# Supplementary material for: An amphipathic helix in Brl1 is required for nuclear pore complex biogenesis in S. cerevisiae
Source: eLife. 2022 Aug 24;11:e78385. doi: 10.7554/eLife.78385 (PMC9402233; doi:10.7554/eLife.78385)
Supplement: Appendix 1—figure 1—source data 1. [file elife-78385-app1-fig1-data1.xlsx]

## Sheet: Sheet1
Supplementary Results Figure 1 - Source Data 1: Fractional Labeling in the source lysate (PRM assay, relates to Supplementary Results Figure 1A)
* Median fractional labeling of all HQ precursor ions in the Brl1 affinity pulldowns
** Median Fractional labeling of all HQ precrusor ions in the source lysate assayed by parallel reaction monitoring MS
Protein	Replicate	Assembly_tier	Median Fractional labelingn Brl1 APs*	Median Fractional labeling source lysate**
NSP1	1	undefined	0.238848	0.357686
NSP1	2	undefined	0.232043	0.329793
NSP1	3	undefined	0.208977	0.354112
KAP123	1	NTR	0.338652	0.378456
KAP123	2	NTR	0.334126	0.369474
KAP123	3	NTR	0.339765	0.366811
MEX67	1	NTR	0.300719	0.296044
MEX67	2	NTR	0.360134	0.292608
MEX67	3	NTR	0.295449	0.262155
MLP1	1	late	0.262947	0.301732
MLP1	2	late	0.225205	0.302382
MLP1	3	late	0.217737	0.307383
MLP2	1	late	0.335257	0.275404
MLP2	2	late	0.324323	0.2779
MLP2	3	late	0.323625	0.318529
NUP1	1	intermediate	0.361528	0.224466
NUP1	2	intermediate	0.368219	0.218252
NUP1	3	intermediate	0.359898	0.247569
NUP159	1	intermediate	0.282188	0.356117
NUP159	2	intermediate	0.258371	0.357129
NUP159	3	intermediate	0.255713	0.347081
NIC96	1	early	0.396003	0.215317
NIC96	2	early	0.373153	0.208497
NIC96	3	early	0.361018	0.224447
NUP100	1	early	0.350478	0.288406
NUP100	2	early	0.329354	0.242665
NUP100	3	early	0.32477	0.257967
NUP116	1	early	0.337901	0.309225
NUP116	2	early	0.326299	0.307453
NUP116	3	early	0.321074	0.304306
NUP133	1	early	0.322306	0.314919
NUP133	2	early	0.309667	0.280417
NUP133	3	early	0.297318	0.303433
NUP170	1	early	0.427356	0.319174
NUP170	2	early	0.404682	0.301275
NUP170	3	early	0.40941	0.274277
NUP192	1	early	0.376995	0.344732
NUP192	2	early	0.374072	0.332894
NUP192	3	early	0.359551	0.323882
NUP53	1	early	0.395684	0.314835
NUP53	2	early	0.379657	0.299733
NUP53	3	early	0.372123	0.25166
NUP57	1	early	0.323353	0.321969
NUP57	2	early	0.318202	0.315853
NUP57	3	early	0.296635	0.342088
POM152	1	early	0.422546	0.227821
POM152	2	early	0.394059	0.270442
POM152	3	early	0.382914	0.260321
ACC1	1	co-purified	0.291402	0.306501
ACC1	2	co-purified	0.279726	0.306227
ACC1	3	co-purified	0.285802	0.306303
RRP5	1	co-purified	0.346445	0.366774
RRP5	2	co-purified	0.351821	0.359212
RRP5	3	co-purified	0.35235	0.349489
