# Supplementary material for: An amphipathic helix in Brl1 is required for nuclear pore complex biogenesis in S. cerevisiae
Source: eLife. 2022 Aug 24;11:e78385. doi: 10.7554/eLife.78385 (PMC9402233; doi:10.7554/eLife.78385)
Supplement: Appendix 1—figure 1—source data 2. [file elife-78385-app1-fig1-data2.xlsx]

## Sheet: Sheet1
Supplementary Results Figure 1 - Source Data 2: Fractional labeling in the lysis intermixing tests with Brl1 bait (Relates to Supplementary Results Figure 1B-D)
*Median fractional labeling of all high quality precursors ions
**Median fractional labeling normalized to the mean fractional labeling in the sample
Protein	Replicate	Bait	Number of HQ precursors	Median Fractional labeling*	Extent of intermxing (%)**	Assembly tier
BRL1	1	BRL1	2	0.011119	2.41392	BRL1
BRL1	2	BRL1	3	0.00872533	2.00867	BRL1
BRL1	3	BRL1	3	0.0126138	2.90925	BRL1
NIC96	2	BRL1	15	0.368544	84.8431	early
NIC96	1	BRL1	14	0.392401	85.1898	early
NIC96	3	BRL1	15	0.376335	86.7979	early
NUP100	1	BRL1	5	0.402565	87.3965	early
NUP100	2	BRL1	6	0.393221	90.5239	early
NUP100	3	BRL1	6	0.40069	92.4151	early
NUP116	3	BRL1	10	0.393873	90.8429	early
NUP116	1	BRL1	8	0.419917	91.1636	early
NUP116	2	BRL1	9	0.394106	90.7276	early
NUP133	2	BRL1	14	0.397442	91.4958	early
NUP133	1	BRL1	12	0.431852	93.7545	early
NUP133	3	BRL1	14	0.401389	92.5762	early
NUP145C	2	BRL1	6	0.36126	83.1661	early
NUP145C	1	BRL1	6	0.402634	87.4114	early
NUP145C	3	BRL1	7	0.369341	85.1848	early
NUP157	2	BRL1	16	0.388581	89.4557	early
NUP157	3	BRL1	16	0.392744	90.5825	early
NUP157	1	BRL1	15	0.413682	89.8098	early
NUP170	2	BRL1	17	0.372134	85.6695	early
NUP170	3	BRL1	16	0.369561	85.2355	early
NUP170	1	BRL1	15	0.401279	87.1172	early
NUP188	1	BRL1	19	0.409038	88.8017	early
NUP188	2	BRL1	21	0.391022	90.0177	early
NUP188	3	BRL1	18	0.387967	89.4806	early
NUP192	2	BRL1	21	0.40133	92.3908	early
NUP192	3	BRL1	19	0.399593	92.1621	early
NUP192	1	BRL1	20	0.425832	92.4477	early
NUP53	2	BRL1	9	0.404099	93.0283	early
NUP53	3	BRL1	9	0.394872	91.0732	early
NUP53	1	BRL1	9	0.429088	93.1546	early
NUP57	2	BRL1	5	0.420823	96.8783	early
NUP57	1	BRL1	7	0.474931	103.107	early
NUP57	3	BRL1	5	0.400583	92.3904	early
POM152	3	BRL1	42	0.387472	89.3665	early
POM152	1	BRL1	39	0.418052	90.7587	early
POM152	2	BRL1	42	0.389779	89.7317	early
NUP1	2	BRL1	4	0.380226	87.5323	intermediate
NUP1	1	BRL1	4	0.43303	94.0103	intermediate
NUP1	3	BRL1	4	0.390173	89.9895	intermediate
NUP120	2	BRL1	8	0.389843	89.7463	intermediate
NUP120	3	BRL1	9	0.3709	85.5443	intermediate
NUP120	1	BRL1	7	0.383513	83.2603	intermediate
NUP159	1	BRL1	12	0.454363	98.6418	intermediate
NUP159	2	BRL1	14	0.427421	98.3973	intermediate
NUP159	3	BRL1	13	0.418827	96.5983	intermediate
NUP2	2	BRL1	12	0.428385	98.6192	intermediate
NUP2	1	BRL1	10	0.487647	105.868	intermediate
NUP2	3	BRL1	11	0.425245	98.0785	intermediate
NUP60	1	BRL1	7	0.41077	89.1777	intermediate
NUP60	2	BRL1	6	0.388013	89.3249	intermediate
NUP60	3	BRL1	7	0.393027	90.6478	intermediate
MLP1	1	BRL1	9	0.445708	96.7627	late
MLP1	2	BRL1	8	0.397312	91.4657	late
MLP1	3	BRL1	5	0.423962	97.7827	late
MLP2	2	BRL1	30	0.438003	100.833	late
MLP2	3	BRL1	26	0.442198	101.989	late
MLP2	1	BRL1	29	0.470156	102.07	late
KAP123	1	BRL1	16	0.483648	105	NTR
KAP123	3	BRL1	19	0.438676	101.176	NTR
KAP123	2	BRL1	19	0.456684	105.134	NTR
KAP95	3	BRL1	8	0.426678	98.4091	NTR
KAP95	2	BRL1	8	0.421951	97.1379	NTR
KAP95	1	BRL1	7	0.442531	96.0729	NTR
MEX67	2	BRL1	13	0.437235	100.657	NTR
MEX67	3	BRL1	13	0.449474	103.667	NTR
MEX67	1	BRL1	10	0.458259	99.4875	NTR
NSP1	2	BRL1	3	0.428849	98.7259	undefined
NSP1	3	BRL1	3	0.43318	99.9085	undefined
NSP1	1	BRL1	3	0.467032	101.392	undefined
