# Supplementary material for: An amphipathic helix in Brl1 is required for nuclear pore complex biogenesis in S. cerevisiae
Source: eLife. 2022 Aug 24;11:e78385. doi: 10.7554/eLife.78385 (PMC9402233; doi:10.7554/eLife.78385)
Supplement: Appendix 1—figure 2—source data 1. [file elife-78385-app1-fig2-data1.xlsx]

## Sheet: Supplementary results figure 2
onion	lineplot	Peak 1	Peak 2	Peak 3	Peak 4	Peak 5	Peak 6	Peak 7	Peak 8		Distances	Mem-Mem	Lumen(both inner membranes, not center of mass)	Mem-Mem	nuclear space	Mem-Mem	nuclear space	Mem-Mem				inner	middle	outer		nuclear space
1	1	0.0231128	0.0338405	0.0830382	0.101998							0.0107277	0.0491977	0.0189599								0.0107277	0.00998162	0.0189599		0.0491977
1	2	0.0211777	0.0342579	0.0850467	0.108412							0.0130802	0.0507889	0.0233649								0.0130802	0.011662	0.0233649		0.0507889
1	3	0.00949698	0.0203453	0.0776642	0.0951138							0.0108484	0.0573189	0.0174496								0.0108484	0.00992741	0.0174496		0.0573189
2	4	0.0113034	0.0350242	0.0863716	0.0963532	0.145914	0.168555					0.0237209	0.0513474	0.00998162	0.049561	0.022641						0.0237209	0.0137446	0.022641		0.0513474
2	5	0.0117306	0.0253396	0.0788043	0.0904663	0.136754	0.155888					0.013609	0.0534647	0.011662	0.0462875	0.0191338						0.013609	0.0155717	0.0191338		0.0534647
2	6	0.00984752	0.0227178	0.0712119	0.0811393	0.123658	0.139335					0.0128703	0.0484941	0.00992741	0.0425187	0.0156769						0.0128703	0.0143751	0.0156769		0.0484941
2	7	0.0111249	0.0330488	0.0805945	0.094339	0.143732	0.174936					0.0219239	0.0475457	0.0137446	0.049393	0.0312043						0.0219239	0.0134942	0.0312043		0.0475457
3	8	0.0174066	0.0382324	0.0913863	0.111459							0.0208258	0.0531539	0.0200724								0.0208258	0.0149265	0.0200724		0.0531539
3	9	0.0111429	0.0341732	0.0804525	0.106623							0.0230303	0.0462793	0.0261707								0.0230303	0.0130552	0.0261707		0.0462793
3	10	0.00854887	0.0291311	0.0742469	0.0922172							0.0205822	0.0451158	0.0179703								0.0205822	0.0133019	0.0179703		0.0451158
4	11	0.00907423	0.0212543	0.0930371	0.111422							0.0121801	0.0717827	0.0183848								0.0121801	0.0138057	0.0183848		0.0717827
4	12	0.0148122	0.0281501	0.0837617	0.0968665							0.0133379	0.0556117	0.0131048								0.0133379	0.0101146	0.0131048		0.0556117
4	13	0.00711793	0.0210434	0.0736859	0.0924559							0.0139254	0.0526426	0.01877								0.0139254	0.0133737	0.01877		0.0526426
5	14	0.0194715	0.0395822	0.0863667	0.10315							0.0201107	0.0467845	0.0167838								0.0201107	0.0124293	0.0167838		0.0467845
5	15	0.0135526	0.029812	0.0796986	0.0950733							0.0162593	0.0498867	0.0153747								0.0162593	0.0125338	0.0153747		0.0498867
5	16	0.0202318	0.0405275	0.10474	0.121365							0.0202957	0.0642121	0.0166251								0.0202957	0.0121182	0.0166251		0.0642121
6	17	0.0153264	0.0352067	0.0896284	0.1052	0.159425	0.178617					0.0198803	0.0544217	0.0155717	0.0542252	0.0191916						0.0198803	0.0131013	0.0191916		0.0544217
7	18	0.0209634	0.0418309	0.12447	0.138845	0.19529	0.208345	0.260176	0.283008			0.0208675	0.0826387	0.0143751	0.0564453		0.0518302	0.0228327				0.0208675	0.0100265	0.0228327		0.0826387
7	19	0.0275431	0.0567731	0.11179	0.125284	0.180789	0.194091	0.248192	0.268638			0.02923	0.0550168	0.0134942	0.0555048		0.0541011	0.0204465				0.02923	0.00990177	0.0204465		0.0550168
7	20	0.0103221	0.0214542	0.0998343	0.114761	0.168994	0.182799	0.236316	0.259282			0.0111321	0.0783801	0.0149265	0.0542328		0.0535172	0.0229653				0.0111321	0.0120944	0.0229653		0.0783801
8	21	0.00955667	0.043181	0.0921207	0.106686							0.0336243	0.0489397	0.0145654								0.0336243	0.0150506	0.0145654		0.0489397
8	22	0.0235321	0.0787222	0.132055	0.15383							0.0551901	0.0533325	0.0217751								0.0551901	0.0113756	0.0217751		0.0533325
8	23	0.0133286	0.0339191	0.0833702	0.104544							0.0205905	0.0494511	0.0211737								0.0205905		0.0211737		0.0494511
9	24	0.0128785	0.0255139	0.092394	0.102509	0.15449	0.170603					0.0126353	0.0668801	0.0101146	0.0519816	0.0161124						0.0126353		0.0161124		0.0668801
9	25	0.00561021	0.0235119	0.100142	0.113516	0.162825	0.183395					0.0179017	0.0766304	0.0133737	0.0493085	0.0205706						0.0179017		0.0205706		0.0766304
9	26	0.0072559	0.0215784	0.0743503	0.0867796	0.141257	0.157931					0.0143225	0.0527719	0.0124293	0.0544778	0.0166731						0.0143225		0.0166731		0.0527719
10	27	0.0113936	0.0298388	0.0757704	0.0883043	0.13716	0.155759					0.0184452	0.0459316	0.0125338	0.048856	0.0185989						0.0184452		0.0185989		0.0459316
10	28	0.03	0.042055	0.0909152	0.103033	0.147708	0.169456					0.0120549	0.0488603	0.0121182	0.0446748	0.0217474						0.0120549		0.0217474		0.0488603
10	29	0.0179294	0.0357923	0.0936513	0.106753	0.153346	0.173303					0.017863	0.057859	0.0131013	0.0465935	0.0199573						0.017863		0.0199573		0.057859
10	30	0.0117688	0.0257401	0.0764083	0.0864348	0.136386	0.158382					0.0139713	0.0506682	0.0100265	0.0499514	0.0219961						0.0139713		0.0219961		0.0506682
11	31	0.0134491	0.032258	0.0866971	0.0965989	0.143889	0.16609					0.0188089	0.0544391	0.00990177	0.0472897	0.0222012						0.0188089		0.0222012		0.0544391
11	32	0.010913	0.0327484	0.0842934	0.0963878	0.148325	0.160999					0.0218354	0.0515449	0.0120944	0.051937	0.0126745						0.0218354		0.0126745		0.0515449
11	33	0.0149768	0.031611	0.074284	0.0893346	0.144263	0.158797					0.0166341	0.042673	0.0150506	0.0549281	0.0145348						0.0166341		0.0145348		0.042673
11	34	0.00965865	0.020784	0.101536	0.112912	0.162242	0.182416					0.0111253	0.0807524	0.0113756	0.0493297	0.0201743						0.0111253		0.0201743		0.0807524
																										0.049561
																										0.0462875
												inner										0.0178823	0.0127945	0.0191627		0.0425187
												middle														0.049393
												outer														0.0542252
																										0.0564453
																					in nm	17.8823	12.7945	19.1627		0.0555048
																										0.0542328
																										0.0519816
																										0.0493085
NE-measurements																										0.0544778
lineplot				um	nm																					0.048856
1	0.0310918	0.0503105		0.0192187	19.2187																					0.0446748
2	0.016121	0.0309052		0.0147842	14.7842																					0.0465935
3	0.0129653	0.0326684		0.0197031	19.7031																					0.0499514
4	0.011129	0.037765		0.026636	26.636																					0.0472897
5	0.0184312	0.0341237		0.0156926	15.6926																					0.051937
6	0.0175738	0.0386791		0.0211053	21.1053																					0.0549281
7	0.0178025	0.0424759		0.0246734	24.6734																					0.0493297
8	0.0180346	0.0314741		0.0134395	13.4395																					0.0518302
9	0.0126171	0.0374221		0.024805	24.805																					0.0541011
10	0.011995	0.0350396		0.0230445	23.0445																					0.0535172
11	0.0126649	0.0299162		0.0172513	17.2513
12	0.0172608	0.0424904		0.0252297	25.2297																					0.0518836
13	0.0152097	0.0355902		0.0203805	20.3805
14	0.0117935	0.0284459		0.0166524	16.6524
15	0.0135657	0.0365883		0.0230225	23.0225
16	0.0198554	0.0420168		0.0221615	22.1615																				in nm	51.8836
17	0.0110588	0.024573		0.0135142	13.5142
18	0.01745	0.0337323		0.0162823	16.2823
19	0.0212326	0.0348454		0.0136128	13.6128
20	0.0170415	0.0402318		0.0231904	23.1904
21	0.0172986	0.0357935		0.0184949	18.4949
22	0.0150105	0.0429874		0.0279768	27.9768
23	0.014439	0.0372321		0.0227931	22.7931
24	0.0170279	0.0353322		0.0183043	18.3043
25	0.014689	0.0338717		0.0191827	19.1827
26	0.0204708	0.0359043		0.0154335	15.4335
27	0.00849481	0.0302764		0.0217816	21.7816
28	0.00760811	0.0347763		0.0271682	27.1682
29	0.0135158	0.0315485		0.0180327	18.0327
30	0.0129622	0.0337011		0.0207389	20.7389
31	0.0115347	0.0313849		0.0198502	19.8502
32	0.0136724	0.0482257		0.0345533	34.5533
33	0.01454	0.0350618		0.0205218	20.5218
34	0.0149	0.0382774		0.0233773	23.3773
35	0.010975	0.0327403		0.0217652	21.7652
36	0.0140142	0.0266236		0.0126094	12.6094
37	0.0108562	0.0330298		0.0221736	22.1736
38	0.0156165	0.0320367		0.0164202	16.4202
39	0.0140401	0.0332605		0.0192204	19.2204
40	0.0164591	0.0384847		0.0220256	22.0256
41	0.0203273	0.0397577		0.0194304	19.4304
42	0.0151268	0.040352		0.0252252	25.2252
				0.0204512	20.4512
