# Supplementary material for: An amphipathic helix in Brl1 is required for nuclear pore complex biogenesis in S. cerevisiae
Source: PubMed Central journal article supplement (PMC9402233; doi:10.7554/elife.78385), 2022-08-24

# Figure 5E

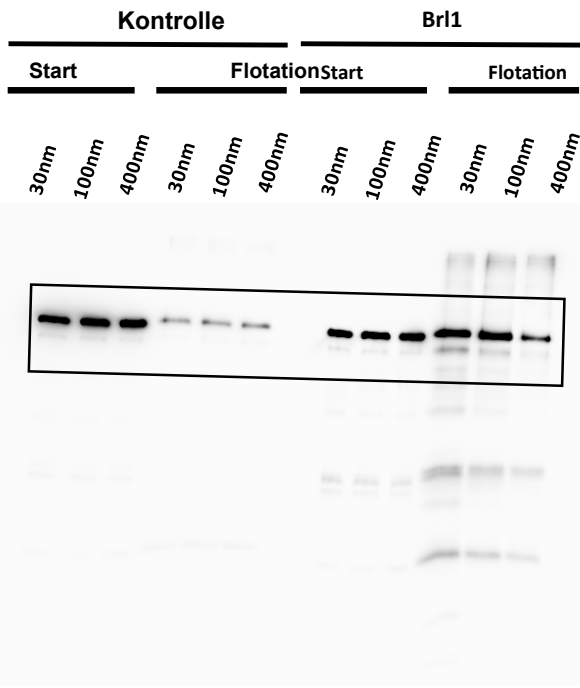

# Figure 5F

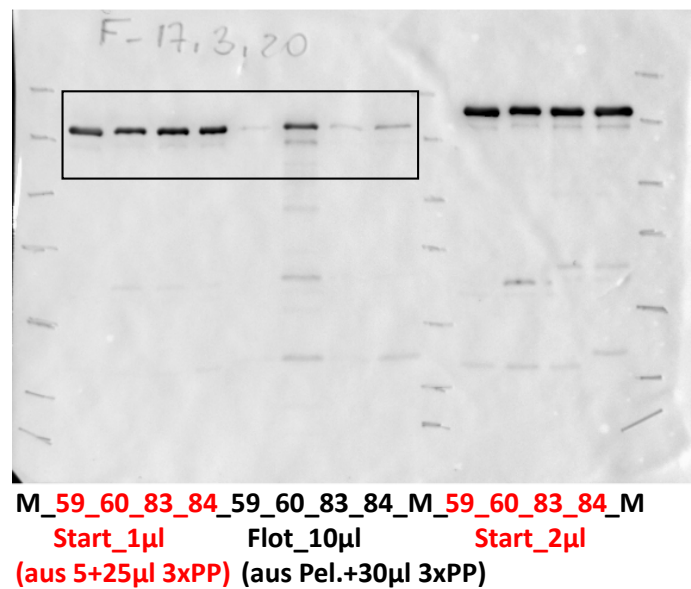

# Figure 3—figure supplement 1B

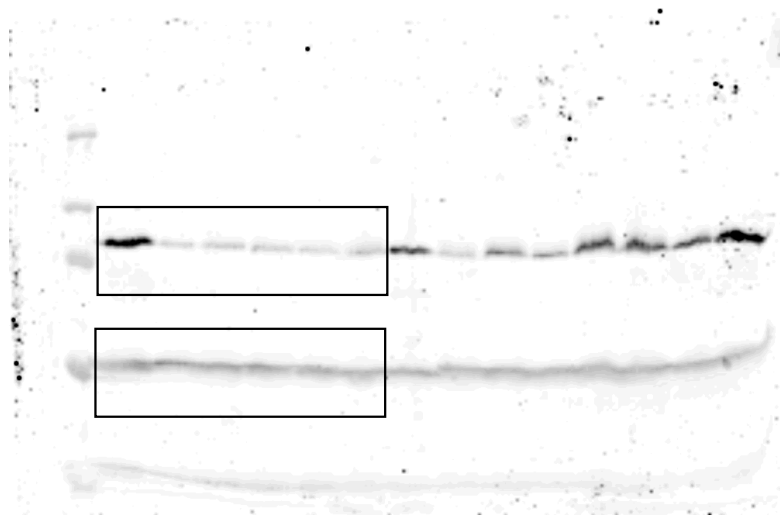

Supplement: elife-78385-fig3-figsupp1-data1.pdf [file elife-78385-fig3-figsupp1-data1.pdf]
