# Supplementary material for: An amphipathic helix in Brl1 is required for nuclear pore complex biogenesis in S. cerevisiae
Source: eLife. 2022 Aug 24;11:e78385. doi: 10.7554/eLife.78385 (PMC9402233; doi:10.7554/eLife.78385)
Supplement: Figure 1—figure supplement 1—source data 1. [file elife-78385-fig1-figsupp1-data1.xlsx]

## Sheet: Sheet1
Figure S1 - Source Data 1: Label-free NUP/NTR intensities with Brl1 bait (Relates to figure S1B)
* Mean intensity of the three most intense precursor ions
Protein	Replicate	Top3 intensity*	Assembly tier
BRL1	1	2.98748e+06	BRL1
BRL1	3	2.01676e+06	BRL1
BRL1	2	2.29847e+06	BRL1
KAP123	1	125763	NTR
KAP123	2	274113	NTR
KAP123	3	191773	NTR
KAP95	1	62386.6	NTR
KAP95	2	79006.7	NTR
KAP95	3	52278.8	NTR
MEX67	1	39672.3	NTR
MEX67	2	63052.1	NTR
MEX67	3	46028.2	NTR
MLP1	1	25184.5	late
MLP1	2	55893.2	late
MLP1	3	34731.5	late
MLP2	1	25973	late
MLP2	2	51787.3	late
MLP2	3	29681.6	late
NIC96	1	127300	early
NIC96	2	207556	early
NIC96	3	126317	early
NSP1	1	46098.1	undefined
NSP1	2	81711.3	undefined
NSP1	3	59928	undefined
NUP1	1	34754.8	intermediate
NUP1	2	55917.5	intermediate
NUP1	3	41875.8	intermediate
NUP100	1	42915.6	early
NUP100	2	69437.1	early
NUP100	3	55230.3	early
NUP116	1	88722.7	early
NUP116	2	149271	early
NUP116	3	92016.9	early
NUP120	2	62016.9	intermediate
NUP120	1	46759.4	intermediate
NUP120	3	53264.8	intermediate
NUP133	3	84919.2	early
NUP133	2	126135	early
NUP133	1	69483.9	early
NUP145C	1	50747	early
NUP145C	3	71740.3	early
NUP145C	2	86546.2	early
NUP145N	1	32280.3	early
NUP145N	2	56393.9	early
NUP145N	3	44769.4	early
NUP157	1	83394.1	early
NUP157	2	146996	early
NUP157	3	98112.5	early
NUP159	1	98324.9	intermediate
NUP159	2	158737	intermediate
NUP159	3	101042	intermediate
NUP170	1	115536	early
NUP170	2	176261	early
NUP170	3	118204	early
NUP188	1	41920	early
NUP188	2	68081.6	early
NUP188	3	69154.9	early
NUP192	1	72110.3	early
NUP192	2	112059	early
NUP192	3	82359.9	early
NUP2	1	48782.5	intermediate
NUP2	2	95354.8	intermediate
NUP2	3	52391.7	intermediate
NUP53	1	27086.9	early
NUP53	2	39567.7	early
NUP53	3	32961.9	early
NUP57	1	74551.8	early
NUP57	2	108204	early
NUP57	3	75082.6	early
NUP60	1	40027.3	intermediate
NUP60	2	60054.1	intermediate
NUP60	3	37414.5	intermediate
POM152	2	170559	early
POM152	1	113058	early
POM152	3	165601	early
