# Supplementary material for: An amphipathic helix in Brl1 is required for nuclear pore complex biogenesis in S. cerevisiae
Source: eLife. 2022 Aug 24;11:e78385. doi: 10.7554/eLife.78385 (PMC9402233; doi:10.7554/eLife.78385)
Supplement: Figure 1—source data 1. [file elife-78385-fig1-data1.xlsx]

## Sheet: Sheet1
Figure 1 - Source Data 1: Label-free Brl1 intensities with 10 NUP baits from Onischenko et al. 2020 (Relates to Figure 1C)
* Mean intensity of the three most intense precursor ions
Bait	Replicate	Protein	Top3 intensity*	Assembly tier
MLP1	1	BRL1	23947.8	late
MLP1	2	BRL1	29948.7	late
MLP1	3	BRL1	29270.3	late
NSP1	1	BRL1	114391	undefined
NSP1	2	BRL1	115188	undefined
NSP1	3	BRL1	147913	undefined
NUP1	1	BRL1	47190.5	intermediate
NUP1	2	BRL1	42803.1	intermediate
NUP1	3	BRL1	49719.8	intermediate
NUP133	1	BRL1	184353	early
NUP133	2	BRL1	127105	early
NUP133	3	BRL1	230432	early
NUP159	1	BRL1	28548.9	intermediate
NUP159	2	BRL1	31205.5	intermediate
NUP159	3	BRL1	28500	intermediate
NUP188	1	BRL1	72657.4	early
NUP188	2	BRL1	66599.1	early
NUP188	3	BRL1	62644.8	early
NUP57	1	BRL1	92410.2	early
NUP57	2	BRL1	97610.6	early
NUP57	3	BRL1	102283	early
NUP82	1	BRL1	60363.2	intermediate
NUP82	2	BRL1	60346.4	intermediate
NUP82	3	BRL1	84026.7	intermediate
NUP84	1	BRL1	166824	early
NUP84	2	BRL1	229675	early
NUP84	3	BRL1	247840	early
NUP85	1	BRL1	85188.5	intermediate
NUP85	2	BRL1	89336.9	intermediate
NUP85	3	BRL1	84139.8	intermediate
