# Supplementary material for: An amphipathic helix in Brl1 is required for nuclear pore complex biogenesis in S. cerevisiae
Source: eLife. 2022 Aug 24;11:e78385. doi: 10.7554/eLife.78385 (PMC9402233; doi:10.7554/eLife.78385)
Supplement: Figure 1—source data 2. [file elife-78385-fig1-data2.xlsx]

## Sheet: Sheet1
		Figure 1 - Source data 2 (Relates to Figure 2F) : co-localization of Brl1-mCherry with old or new Nup170-yEGFP marked NPCs using the RITE strategy
		Pearson Correlation coefficient of Brl1-mCherry and Nup170-RITE intensity profiles along the NE of individual cells in 5 biological replicates (n=1-5).
		In the graph, individual points reflect the average of a biological replicate.
		Cells were imaged ~30min (for new-yEGFP) or ~5h (for old Nup170-yEGFP) after recombination induction.
																		Average Pearson Corr
																		OLD	NEW
				n=1		n=2		n=3		n=4		n=5					n=1	-0.0526921	0.272627
			Average	-0.0526921	0.272627	0.074825	0.207568	-0.113491	0.149341	-0.0632109	0.273608	-0.0804675	0.314197				n=2	0.074825	0.207568
																	n=3	-0.113491	0.149341
				Pearson Corr Coeff													n=4	-0.0632109	0.273608
				old Nup170-yEGFP	new Nup170-yEGFP	old Nup170-yEGFP	new Nup170-yEGFP	old Nup170-yEGFP	new Nup170-yEGFP	old Nup170-yEGFP	new Nup170-yEGFP	old Nup170-yEGFP	new Nup170-yEGFP				n=5	-0.0804675	0.314197
				-0.111325	0.419111	0.148205	-0.0471574	-0.0225291	0.174293	0.236856	0.174756	-0.0672205	0.0875108
				-0.181903	0.575147	-0.0576654	0.866229	0.192816	0.558744	-0.249793	0.348234	-0.221061	0.209085				Average	-0.0470073	0.243468
				0.39622	0.37268	0.198571	0.715887	0.346979	-0.0512833	-0.199	0.710315	-0.219615	-0.613626				Two tailed Student's t-test		0.000152638
				-0.163083	0.192719	-0.215195	0.601992	0.0573033	0.335588	-0.252415	0.696742	-0.0921491	0.391496						***
				-0.219869	0.337953	-0.294339	-0.0271154	-0.131873	0.630042	0.150744	0.442621	-0.315147	0.447294
				-0.00711116	0.0990871	0.455123	0.145899	-0.0895665	0.413242	-0.639075	0.719037	-0.398759	0.121405
				0.356844	0.520034	0.0261302	0.485469	-0.288639	-0.163808	-0.203821	-0.0485091	0.0349775	0.45642
				-0.421715	0.193625	-0.046986	0.350072	-0.245636	-0.327259	-0.0780659	-0.127424	-0.288549	0.366473
				0.0145924	0.644248	-0.0567082	-0.264641	-0.130679	0.520055	0.305871	-0.085851	-0.0871072	0.0339511
				0.30245	0.194479	0.114774	0.327681	0.00544393	0.486382	-0.609681	0.575842	0.0476773	0.420122
				-0.137577	0.0191387	0.346189	0.10817	-0.578268	-0.0385773	0.458379	0.739247	0.210603	0.316723
				0.530401	-0.0280788	0.368261	0.35974	-0.252382	0.321654	0.121534	-0.0236852	-0.372252	-0.188914
				-0.217251	0.302228	0.377737	0.342204	-0.210398	-0.160399	-0.234209	0.0142841	-0.0492779	0.208765
				-0.0461865	0.491474	-0.566945	0.324563	-0.0652936	-0.0658021	0.252068	0.362192	0.15375	0.536134
				-0.138778	0.227731	0.323545	0.135934	0.0870189	0.187845	0.217957	-0.371263	-0.184882	0.507528
				0.152128	0.366071	-0.0438114	0.24472	-0.189224	-0.024022	-0.0984504	0.218582	-0.348971	0.731973
				0.310282	0.144039	0.17539	0.151043	-0.284102	0.585881	-0.292007	0.80323	0.0206076	0.513236
				-0.300677	0.135254	-0.0785586	-0.240285	-0.427833	0.0461631	-0.28828	0.472669	-0.162411	0.276948
				0.114752	0.245146	0.0347759	-0.0995781	-0.461366	0.393448	0.160857	0.336648	-0.31898	0.247457
				-0.0733526	0.616144	0.106291	0.0932531	-0.010117	-0.106029	0.479564	0.302525	0.344398	0.785846
				0.0521332	0.293602	-0.129555	0.360844	0.39906	0.683775	-0.204122	-0.151946	-0.230296	0.412842
				-0.170899	0.302496	0.551549	0.445643	-0.281078	0.336747	0.274706	-0.0852201	0.0784006	0.63266
				-0.0301681	-0.230752	-0.1287	0.106637	0.363303	0.39777	-0.287557	0.436137	-0.114731	0.372022
				-0.104493	0.810571	0.0699839	-0.38298	0.0142495	0.607723	-0.0742102	0.470677	-0.186359	0.393565
				-0.234734	-0.17429	0.483911	-0.110581	-0.0967338	-0.096812	-0.201046	0.303034	0.0654247	0.425033
				-0.351519	0.325499	-0.110815	0.190248	-0.094231	0.302356	-0.17398	0.282863	0.267262	0.0804069
				-0.188991	-0.180918	-0.197168	0.56009	-0.493618	-0.328556	-0.336875	-0.218146	-0.475965	0.647677
				-0.342373	0.419111	-0.197168	0.411552	-0.0476431	0.279568	-0.0741424	0.452464	-0.203265	0.593578
				-0.350503		-0.01162	-0.0228424	-0.000774788	0.14321	-0.0539812	0.50675	-0.484377	0.420235
				-0.0180574		0.599548	0.0943552	0.421151	-0.176177	0.475881	-0.24623	0.283117	0.169053
								-0.312603	0.241064	-0.397276	0.465545	0.14794	0.162352
								0.00815864	0.0217117	-0.640825	-0.399503	0.262114	-0.481839
								-0.228883	0.00356074	0.409954	0.404118	0.128747	0.417165
								0.0380444	-0.462173	-0.15231	-0.0248454	0.172349	0.483655
								0.331048	-0.555808	-0.0156298	0.627418	-0.461598	-0.16835
								-0.0672965	0.620925		0.787542	-0.183628	0.520548
								-0.180172	0.35482		0.0441025	-0.181874	0.694233
								-0.180172	-0.331828		0.0230622	0.0620546	0.161848
								-0.24685	0.383436		0.219218	0.210505	0.377926
								-0.457889	0.403594		0.523641	0.439343	0.538646
								-0.335836	0.353463		0.308372	-0.401119	0.441248
								0.360656	0.304853		0.600001	-0.495974	0.502349
								-0.23031	-0.0450798		0.219726	0.0809325	0.194815
								-0.597842	0.0911683		0.392052	-0.0490693	0.278722
								-0.351658	0.315414		0.0189993	0.29422	0.52971
								-0.210476	-0.0694038		0.426088	-0.297875	0.463784
								-0.51605	0.276157		0.428767	-0.20462	-0.239049
								0.183224	-0.285094		0.425737	-0.162814	0.250031
								0.0030555	0.0247133		0.0206504	0.203737	0.421916
								0.2913	-0.0233262		0.252805	-0.235994	0.321114
								-0.519983	-0.145715		0.251686	-0.260154	0.509392
								-0.0435442	0.347582		0.484794	-0.0600043	0.415736
								-0.236273	-0.0475301		-0.00932489	0.044451	-0.0925012
									0.461193			-0.30578	0.616751
									-0.109748			0.438373	0.00408816
									0.369411			-0.258523	0.675099
												-0.404362	0.495087
												0.211553	-0.273924
												0.0448713
												-0.127881
												-0.209898
												0.0770295
												0.384208
												-0.317781
												0.0555366
												-0.542144
												-0.294679
												-0.106234
												-0.169857
												0.0044366
												0.0714257
