# Supplementary material for: An amphipathic helix in Brl1 is required for nuclear pore complex biogenesis in S. cerevisiae
Source: eLife. 2022 Aug 24;11:e78385. doi: 10.7554/eLife.78385 (PMC9402233; doi:10.7554/eLife.78385)
Supplement: Figure 2—source data 1. [file elife-78385-fig2-data1.xlsx]

## Sheet: Sheet1
Figure 2 - Source Data 1: Fractional labeling of NUPs/NTRs in Brl1 KARMA assays (Relates to Figure 2 and S1)
* The median fractional labeling of all high quality precursors ions for a protein
Protein	TimePoint	Replicate	Bait	Number of HQ precursors	Median Fractional labeling*
BRL1	t30	1	BRL1	5	0.101068
BRL1	t30	2	BRL1	5	0.0985891
BRL1	t30	3	BRL1	5	0.108324
BRL1	t60	1	BRL1	5	0.25071
BRL1	t60	2	BRL1	5	0.25083
BRL1	t60	3	BRL1	5	0.245706
BRL1	t90	1	BRL1	5	0.374801
BRL1	t90	2	BRL1	5	0.379016
BRL1	t90	3	BRL1	5	0.382209
KAP123	t30	1	BRL1	7	0.103501
KAP123	t30	2	BRL1	7	0.114071
KAP123	t30	3	BRL1	7	0.117165
KAP123	t60	1	BRL1	7	0.230047
KAP123	t60	2	BRL1	7	0.223115
KAP123	t60	3	BRL1	7	0.2287
KAP123	t90	1	BRL1	7	0.338652
KAP123	t90	2	BRL1	7	0.334126
KAP123	t90	3	BRL1	6	0.339765
KAP95	t30	1	BRL1	3	0.0783572
KAP95	t30	2	BRL1	3	0.0784828
KAP95	t30	3	BRL1	3	0.103877
KAP95	t60	1	BRL1	3	0.211386
KAP95	t60	2	BRL1	3	0.211976
KAP95	t60	3	BRL1	3	0.187109
KAP95	t90	1	BRL1	2	0.288003
KAP95	t90	2	BRL1	2	0.288738
KAP95	t90	3	BRL1	3	0.285939
MEX67	t30	1	BRL1	3	0.0828972
MEX67	t30	2	BRL1	4	0.094722
MEX67	t30	3	BRL1	4	0.117662
MEX67	t60	1	BRL1	4	0.176198
MEX67	t60	2	BRL1	3	0.166306
MEX67	t60	3	BRL1	4	0.256142
MEX67	t90	1	BRL1	4	0.300719
MEX67	t90	2	BRL1	3	0.360134
MEX67	t90	3	BRL1	3	0.295449
MLP1	t30	1	BRL1	11	0.0588852
MLP1	t30	2	BRL1	10	0.0464768
MLP1	t30	3	BRL1	11	0.0726141
MLP1	t60	1	BRL1	9	0.150938
MLP1	t60	2	BRL1	10	0.190344
MLP1	t60	3	BRL1	11	0.144604
MLP1	t90	1	BRL1	10	0.262947
MLP1	t90	2	BRL1	11	0.225205
MLP1	t90	3	BRL1	11	0.217737
MLP2	t30	1	BRL1	13	0.100841
MLP2	t30	2	BRL1	14	0.0966531
MLP2	t30	3	BRL1	13	0.117066
MLP2	t60	1	BRL1	13	0.23642
MLP2	t60	2	BRL1	9	0.211344
MLP2	t60	3	BRL1	14	0.230457
MLP2	t90	1	BRL1	14	0.335257
MLP2	t90	2	BRL1	14	0.324323
MLP2	t90	3	BRL1	14	0.323625
NIC96	t30	1	BRL1	8	0.146164
NIC96	t30	2	BRL1	7	0.152664
NIC96	t30	3	BRL1	7	0.132628
NIC96	t60	1	BRL1	7	0.266461
NIC96	t60	2	BRL1	7	0.284126
NIC96	t60	3	BRL1	8	0.271983
NIC96	t90	1	BRL1	8	0.396003
NIC96	t90	2	BRL1	7	0.373153
NIC96	t90	3	BRL1	7	0.361018
NSP1	t30	1	BRL1	4	0.0491638
NSP1	t30	2	BRL1	4	0.0678074
NSP1	t30	3	BRL1	4	0.0606424
NSP1	t60	1	BRL1	4	0.141141
NSP1	t60	2	BRL1	3	0.138379
NSP1	t60	3	BRL1	4	0.138103
NSP1	t90	1	BRL1	4	0.238848
NSP1	t90	2	BRL1	4	0.232043
NSP1	t90	3	BRL1	4	0.208977
NUP1	t30	1	BRL1	4	0.110795
NUP1	t30	2	BRL1	4	0.101017
NUP1	t30	3	BRL1	4	0.124444
NUP1	t60	1	BRL1	4	0.2578
NUP1	t60	2	BRL1	3	0.243721
NUP1	t60	3	BRL1	4	0.241811
NUP1	t90	1	BRL1	4	0.361528
NUP1	t90	2	BRL1	4	0.368219
NUP1	t90	3	BRL1	4	0.359898
NUP100	t30	1	BRL1	3	0.126688
NUP100	t30	2	BRL1	3	0.133821
NUP100	t30	3	BRL1	3	0.103491
NUP100	t60	1	BRL1	3	0.244248
NUP100	t60	2	BRL1	2	0.214476
NUP100	t60	3	BRL1	3	0.210392
NUP100	t90	1	BRL1	3	0.350478
NUP100	t90	2	BRL1	3	0.329354
NUP100	t90	3	BRL1	3	0.32477
NUP116	t30	1	BRL1	7	0.10424
NUP116	t30	2	BRL1	7	0.106622
NUP116	t30	3	BRL1	7	0.112286
NUP116	t60	1	BRL1	7	0.224363
NUP116	t60	2	BRL1	7	0.234427
NUP116	t60	3	BRL1	6	0.220471
NUP116	t90	1	BRL1	7	0.337901
NUP116	t90	2	BRL1	7	0.326299
NUP116	t90	3	BRL1	7	0.321074
NUP120	t30	1	BRL1	3	0.0844754
NUP120	t30	2	BRL1	3	0.107446
NUP120	t30	3	BRL1	3	0.09321
NUP120	t60	1	BRL1	3	0.228993
NUP120	t60	2	BRL1	3	0.1946
NUP120	t60	3	BRL1	3	0.210409
NUP120	t90	1	BRL1	3	0.341566
NUP120	t90	2	BRL1	3	0.337816
NUP120	t90	3	BRL1	3	0.322279
NUP133	t30	1	BRL1	9	0.08975
NUP133	t30	2	BRL1	8	0.0954491
NUP133	t30	3	BRL1	8	0.093303
NUP133	t60	1	BRL1	9	0.22181
NUP133	t60	2	BRL1	7	0.220657
NUP133	t60	3	BRL1	7	0.210961
NUP133	t90	1	BRL1	9	0.322306
NUP133	t90	2	BRL1	8	0.309667
NUP133	t90	3	BRL1	8	0.297318
NUP145C	t30	1	BRL1	5	0.106319
NUP145C	t30	2	BRL1	5	0.115148
NUP145C	t30	3	BRL1	5	0.111983
NUP145C	t60	1	BRL1	5	0.258824
NUP145C	t60	2	BRL1	5	0.22402
NUP145C	t60	3	BRL1	4	0.249975
NUP145C	t90	1	BRL1	4	0.355828
NUP145C	t90	2	BRL1	5	0.350655
NUP145C	t90	3	BRL1	5	0.339312
NUP145N	t30	1	BRL1	3	0.0699901
NUP145N	t30	2	BRL1	3	0.0569641
NUP145N	t30	3	BRL1	3	0.0884311
NUP145N	t60	1	BRL1	3	0.234934
NUP145N	t60	2	BRL1	2	0.194949
NUP145N	t60	3	BRL1	3	0.219089
NUP145N	t90	1	BRL1	3	0.348853
NUP145N	t90	2	BRL1	3	0.341732
NUP145N	t90	3	BRL1	3	0.329895
NUP157	t30	1	BRL1	9	0.0681061
NUP157	t30	2	BRL1	7	0.074426
NUP157	t30	3	BRL1	9	0.0788463
NUP157	t60	1	BRL1	8	0.214517
NUP157	t60	2	BRL1	7	0.19802
NUP157	t60	3	BRL1	9	0.198338
NUP157	t90	1	BRL1	9	0.318488
NUP157	t90	2	BRL1	8	0.310384
NUP157	t90	3	BRL1	9	0.31197
NUP159	t30	1	BRL1	12	0.0511332
NUP159	t30	2	BRL1	12	0.0669285
NUP159	t30	3	BRL1	11	0.0506713
NUP159	t60	1	BRL1	11	0.157771
NUP159	t60	2	BRL1	10	0.185169
NUP159	t60	3	BRL1	12	0.149765
NUP159	t90	1	BRL1	12	0.282188
NUP159	t90	2	BRL1	11	0.258371
NUP159	t90	3	BRL1	11	0.255713
NUP170	t30	1	BRL1	7	0.153437
NUP170	t30	2	BRL1	7	0.150916
NUP170	t30	3	BRL1	6	0.16552
NUP170	t60	1	BRL1	7	0.299741
NUP170	t60	2	BRL1	7	0.279965
NUP170	t60	3	BRL1	7	0.289771
NUP170	t90	1	BRL1	7	0.427356
NUP170	t90	2	BRL1	6	0.404682
NUP170	t90	3	BRL1	6	0.40941
NUP188	t30	1	BRL1	7	0.0906986
NUP188	t30	2	BRL1	8	0.0990923
NUP188	t30	3	BRL1	8	0.101796
NUP188	t60	1	BRL1	8	0.227133
NUP188	t60	2	BRL1	8	0.20684
NUP188	t60	3	BRL1	8	0.230899
NUP188	t90	1	BRL1	7	0.34443
NUP188	t90	2	BRL1	7	0.332944
NUP188	t90	3	BRL1	8	0.326839
NUP192	t30	1	BRL1	10	0.126077
NUP192	t30	2	BRL1	9	0.132034
NUP192	t30	3	BRL1	10	0.125905
NUP192	t60	1	BRL1	10	0.268629
NUP192	t60	2	BRL1	7	0.257358
NUP192	t60	3	BRL1	10	0.257616
NUP192	t90	1	BRL1	8	0.376995
NUP192	t90	2	BRL1	8	0.374072
NUP192	t90	3	BRL1	8	0.359551
NUP2	t30	1	BRL1	6	0.0732801
NUP2	t30	2	BRL1	6	0.0717829
NUP2	t30	3	BRL1	6	0.0761922
NUP2	t60	1	BRL1	6	0.185636
NUP2	t60	2	BRL1	5	0.18034
NUP2	t60	3	BRL1	6	0.173217
NUP2	t90	1	BRL1	6	0.284021
NUP2	t90	2	BRL1	6	0.295681
NUP2	t90	3	BRL1	6	0.285675
NUP53	t30	1	BRL1	2	0.142473
NUP53	t30	2	BRL1	2	0.153701
NUP53	t30	3	BRL1	2	0.14357
NUP53	t60	1	BRL1	2	0.28508
NUP53	t60	2	BRL1	2	0.241364
NUP53	t60	3	BRL1	2	0.280424
NUP53	t90	1	BRL1	2	0.395684
NUP53	t90	2	BRL1	2	0.379657
NUP53	t90	3	BRL1	2	0.372123
NUP57	t30	1	BRL1	2	0.0777199
NUP57	t30	2	BRL1	2	0.0794178
NUP57	t30	3	BRL1	2	0.0780498
NUP57	t60	1	BRL1	2	0.23238
NUP57	t60	2	BRL1	2	0.195628
NUP57	t60	3	BRL1	2	0.223464
NUP57	t90	1	BRL1	2	0.323353
NUP57	t90	2	BRL1	2	0.318202
NUP57	t90	3	BRL1	2	0.296635
NUP60	t30	1	BRL1	3	0.089601
NUP60	t30	2	BRL1	3	0.0795516
NUP60	t30	3	BRL1	3	0.0905808
NUP60	t60	1	BRL1	3	0.198077
NUP60	t60	2	BRL1	3	0.17245
NUP60	t60	3	BRL1	3	0.178324
NUP60	t90	1	BRL1	3	0.300479
NUP60	t90	2	BRL1	3	0.299366
NUP60	t90	3	BRL1	3	0.290687
POM152	t30	1	BRL1	15	0.124794
POM152	t30	2	BRL1	15	0.130447
POM152	t30	3	BRL1	15	0.126566
POM152	t60	1	BRL1	15	0.282193
POM152	t60	2	BRL1	15	0.26774
POM152	t60	3	BRL1	15	0.276509
POM152	t90	1	BRL1	14	0.422546
POM152	t90	2	BRL1	15	0.394059
POM152	t90	3	BRL1	15	0.382914
