# Supplementary material for: An amphipathic helix in Brl1 is required for nuclear pore complex biogenesis in S. cerevisiae
Source: eLife. 2022 Aug 24;11:e78385. doi: 10.7554/eLife.78385 (PMC9402233; doi:10.7554/eLife.78385)
Supplement: Figure 2—source data 2. [file elife-78385-fig2-data2.xlsx]

## Sheet: Sheet1
Figure 2 - Source Data 2: Inaccessible pools as estimated by the 3-step KSM (Onischenko et al 2020) for Brl1 and NUP baits (relates to Figure 2C)
Bait	Protein	Assembly tier	Inaccessible pool
BRL1	NUP145C	1 early	0.143872
BRL1	NUP188	1 early	0.13135
BRL1	NUP53	1 early	0.261861
BRL1	NUP57	1 early	0
BRL1	POM152	1 early	0.29145
BRL1	NUP170	1 early	0.337406
BRL1	NUP159	2 intermediate	0
BRL1	NUP1	2 intermediate	0.193675
BRL1	NUP120	2 intermediate	0.147769
BRL1	MLP2	3 late	0.0662099
BRL1	MLP1	3 late	0
MLP1	NUP145C	1 early	0
MLP1	NUP170	1 early	0
MLP1	NUP53	1 early	0
MLP1	NUP57	1 early	0
MLP1	POM152	1 early	0
MLP1	NUP188	1 early	0
MLP1	NUP120	2 intermediate	0
MLP1	NUP1	2 intermediate	0
MLP1	NUP159	2 intermediate	0
MLP1	MLP2	3 late	0
NSP1	POM152	1 early	0
NSP1	NUP57	1 early	0
NSP1	NUP170	1 early	0
NSP1	NUP188	1 early	0
NSP1	NUP53	1 early	0
NSP1	NUP145C	1 early	0
NSP1	NUP159	2 intermediate	0
NSP1	NUP120	2 intermediate	0
NSP1	NUP1	2 intermediate	0
NSP1	MLP2	3 late	0
NSP1	MLP1	3 late	0
NUP1	NUP188	1 early	0
NUP1	NUP170	1 early	0
NUP1	NUP145C	1 early	0
NUP1	POM152	1 early	0
NUP1	NUP57	1 early	0
NUP1	NUP53	1 early	0
NUP1	NUP159	2 intermediate	0
NUP1	NUP120	2 intermediate	0
NUP1	MLP2	3 late	0
NUP1	MLP1	3 late	0
NUP133	NUP53	1 early	0
NUP133	NUP188	1 early	0
NUP133	NUP170	1 early	0
NUP133	NUP145C	1 early	0.215244
NUP133	POM152	1 early	0
NUP133	NUP57	1 early	0
NUP133	NUP1	2 intermediate	0.100326
NUP133	NUP159	2 intermediate	0
NUP133	NUP120	2 intermediate	0.116149
NUP133	MLP1	3 late	0
NUP133	MLP2	3 late	0
NUP159	POM152	1 early	0
NUP159	NUP57	1 early	0
NUP159	NUP53	1 early	0
NUP159	NUP188	1 early	0
NUP159	NUP170	1 early	0
NUP159	NUP145C	1 early	0
NUP159	NUP1	2 intermediate	0
NUP159	NUP120	2 intermediate	0
NUP159	MLP2	3 late	0
NUP159	MLP1	3 late	0
NUP188	POM152	1 early	0
NUP188	NUP53	1 early	0
NUP188	NUP170	1 early	0
NUP188	NUP57	1 early	0
NUP188	NUP145C	1 early	0
NUP188	NUP1	2 intermediate	0.150828
NUP188	NUP159	2 intermediate	0
NUP188	NUP120	2 intermediate	0
NUP188	MLP2	3 late	0
NUP188	MLP1	3 late	0
NUP57	POM152	1 early	0
NUP57	NUP188	1 early	0
NUP57	NUP170	1 early	0
NUP57	NUP145C	1 early	0
NUP57	NUP53	1 early	0
NUP57	NUP159	2 intermediate	0
NUP57	NUP120	2 intermediate	0
NUP57	NUP1	2 intermediate	0.106139
NUP57	MLP2	3 late	0
NUP57	MLP1	3 late	0
NUP82	POM152	1 early	0
NUP82	NUP57	1 early	0
NUP82	NUP53	1 early	0
NUP82	NUP188	1 early	0
NUP82	NUP170	1 early	0
NUP82	NUP145C	1 early	0
NUP82	NUP159	2 intermediate	0.174121
NUP82	NUP1	2 intermediate	0.0629271
NUP82	NUP120	2 intermediate	0
NUP82	MLP2	3 late	0
NUP82	MLP1	3 late	0
NUP84	NUP170	1 early	0
NUP84	NUP145C	1 early	0.202081
NUP84	NUP188	1 early	0
NUP84	NUP53	1 early	0
NUP84	NUP57	1 early	0
NUP84	POM152	1 early	0
NUP84	NUP159	2 intermediate	0
NUP84	NUP1	2 intermediate	0.103239
NUP84	NUP120	2 intermediate	0.124181
NUP84	MLP1	3 late	0
NUP84	MLP2	3 late	0
NUP85	NUP145C	1 early	0
NUP85	POM152	1 early	0
NUP85	NUP170	1 early	0
NUP85	NUP188	1 early	0
NUP85	NUP53	1 early	0
NUP85	NUP57	1 early	0
NUP85	NUP159	2 intermediate	0
NUP85	NUP1	2 intermediate	0.095833
NUP85	NUP120	2 intermediate	0
NUP85	MLP1	3 late	0
NUP85	MLP2	3 late	0
