# Supplementary material for: An amphipathic helix in Brl1 is required for nuclear pore complex biogenesis in S. cerevisiae
Source: eLife. 2022 Aug 24;11:e78385. doi: 10.7554/eLife.78385 (PMC9402233; doi:10.7554/eLife.78385)
Supplement: Figure 4—figure supplement 1—source data 1. [file elife-78385-fig4-figsupp1-data1.xlsx]

## Sheet: Sheet1
Figure S3 - Source Data 1: Fractional labeling in the lysis intermixing tests for Nup170 bait (Relates to Figure S3)
* The median fractional labeling of all high quality precursors ions
** The median fractional labeling normalized to the mean fractional labeling in the sample
Protein	Replicate	Bait	Treatment	Number of HQ precursors	Median fractional labeling*	Extent of intermxing (%)**
NUP59	1	NUP170	Auxin	5	0.388508	81.3909
NUP59	2	NUP170	Auxin	9	0.398246	82.7377
NUP59	3	NUP170	Auxin	9	0.433789	85.5668
NUP59	1	NUP170	Ethanol	8	0.315484	69.9416
NUP59	2	NUP170	Ethanol	7	0.337356	71.106
NUP59	3	NUP170	Ethanol	8	0.307202	72.9901
BRL1	1	NUP170	Ethanol	3	0.335154	74.3024
BRL1	2	NUP170	Ethanol	3	0.404151	85.1846
BRL1	3	NUP170	Ethanol	3	0.325799	77.4087
XPO1	1	NUP170	Auxin	6	0.471186	98.7118
XPO1	2	NUP170	Auxin	6	0.474875	98.6576
XPO1	3	NUP170	Auxin	7	0.479423	94.5684
XPO1	1	NUP170	Ethanol	7	0.432785	95.9468
XPO1	2	NUP170	Ethanol	8	0.4807	101.319
XPO1	3	NUP170	Ethanol	8	0.426477	101.329
GLE2	1	NUP170	Auxin	3	0.39504	82.7594
GLE2	2	NUP170	Auxin	5	0.40679	84.5127
GLE2	3	NUP170	Auxin	5	0.439106	86.6158
GLE2	1	NUP170	Ethanol	5	0.300079	66.5263
GLE2	2	NUP170	Ethanol	4	0.328473	69.2338
GLE2	3	NUP170	Ethanol	5	0.288455	68.5357
KAP120	1	NUP170	Ethanol	4	0.457193	101.358
KAP120	2	NUP170	Ethanol	3	0.487533	102.759
KAP120	3	NUP170	Ethanol	3	0.471043	111.918
KAP123	1	NUP170	Auxin	19	0.467394	97.9173
KAP123	2	NUP170	Auxin	21	0.475651	98.8188
KAP123	3	NUP170	Auxin	21	0.485149	95.6979
KAP123	1	NUP170	Ethanol	21	0.439857	97.5147
KAP123	2	NUP170	Ethanol	16	0.464187	97.8387
KAP123	3	NUP170	Ethanol	21	0.440057	104.556
KAP95	1	NUP170	Auxin	9	0.466468	97.7234
KAP95	2	NUP170	Auxin	8	0.46173	95.9267
KAP95	3	NUP170	Auxin	9	0.487731	96.2071
KAP95	1	NUP170	Ethanol	9	0.425471	94.3255
KAP95	2	NUP170	Ethanol	9	0.445382	93.875
KAP95	3	NUP170	Ethanol	9	0.399572	94.9369
MEX67	1	NUP170	Auxin	16	0.451705	94.6306
MEX67	2	NUP170	Auxin	18	0.455949	94.7256
MEX67	3	NUP170	Auxin	17	0.475115	93.7187
MEX67	1	NUP170	Ethanol	16	0.392426	86.9993
MEX67	2	NUP170	Ethanol	16	0.422443	89.0401
MEX67	3	NUP170	Ethanol	16	0.358088	85.0805
MLP1	1	NUP170	Auxin	9	0.454581	95.233
MLP1	2	NUP170	Auxin	10	0.428679	89.0603
MLP1	3	NUP170	Auxin	11	0.449684	88.7023
MLP1	1	NUP170	Ethanol	12	0.362387	80.34
MLP1	2	NUP170	Ethanol	12	0.358408	75.5433
MLP1	3	NUP170	Ethanol	12	0.337889	80.2811
MLP2	1	NUP170	Auxin	32	0.465894	97.6031
MLP2	2	NUP170	Auxin	35	0.473694	98.4122
MLP2	3	NUP170	Auxin	35	0.503323	99.2828
MLP2	1	NUP170	Ethanol	31	0.419593	93.0222
MLP2	2	NUP170	Ethanol	29	0.439862	92.7116
MLP2	3	NUP170	Ethanol	33	0.390744	92.8393
NDC1	1	NUP170	Auxin	5	0.357398	74.8737
NDC1	2	NUP170	Auxin	4	0.357306	74.2322
NDC1	3	NUP170	Auxin	5	0.370842	73.1502
NDC1	1	NUP170	Ethanol	6	0.271482	60.1865
NDC1	2	NUP170	Ethanol	6	0.286076	60.2974
NDC1	3	NUP170	Ethanol	6	0.262236	62.3063
NIC96	1	NUP170	Auxin	16	0.370233	77.5624
NIC96	2	NUP170	Auxin	17	0.366978	76.2416
NIC96	3	NUP170	Auxin	18	0.391494	77.224
NIC96	1	NUP170	Ethanol	18	0.265238	58.8022
NIC96	2	NUP170	Ethanol	17	0.273955	57.7427
NIC96	3	NUP170	Ethanol	15	0.239413	56.8836
NSP1	1	NUP170	Auxin	4	0.413454	86.6172
NSP1	2	NUP170	Auxin	6	0.394513	81.9621
NSP1	3	NUP170	Auxin	5	0.411387	81.148
NSP1	1	NUP170	Ethanol	6	0.296701	65.7775
NSP1	2	NUP170	Ethanol	6	0.31216	65.7954
NSP1	3	NUP170	Ethanol	7	0.300245	71.337
NUP1	1	NUP170	Auxin	6	0.373885	78.3275
NUP1	2	NUP170	Auxin	5	0.35513	73.7801
NUP1	3	NUP170	Auxin	6	0.398137	78.5343
NUP1	1	NUP170	Ethanol	7	0.277262	61.4679
NUP1	2	NUP170	Ethanol	5	0.285503	60.1768
NUP1	3	NUP170	Ethanol	6	0.264166	62.7647
NUP100	1	NUP170	Auxin	5	0.373896	78.3298
NUP100	2	NUP170	Auxin	6	0.365828	76.0026
NUP100	3	NUP170	Auxin	6	0.394152	77.7483
NUP100	1	NUP170	Ethanol	8	0.30064	66.6508
NUP100	2	NUP170	Ethanol	8	0.333434	70.2793
NUP100	3	NUP170	Ethanol	7	0.298227	70.8576
NUP116	1	NUP170	Auxin	7	0.379024	79.4041
NUP116	2	NUP170	Auxin	9	0.366897	76.2248
NUP116	3	NUP170	Auxin	7	0.397958	78.499
NUP116	1	NUP170	Ethanol	9	0.295862	65.5915
NUP116	2	NUP170	Ethanol	10	0.308714	65.0691
NUP116	3	NUP170	Ethanol	7	0.268062	63.6904
NUP120	1	NUP170	Auxin	6	0.366	76.6757
NUP120	2	NUP170	Auxin	5	0.379472	78.8373
NUP120	3	NUP170	Auxin	6	0.419425	82.7335
NUP120	1	NUP170	Ethanol	8	0.293128	64.9854
NUP120	2	NUP170	Ethanol	8	0.302946	63.8532
NUP120	3	NUP170	Ethanol	8	0.274417	65.2006
NUP133	1	NUP170	Auxin	14	0.417993	87.5681
NUP133	2	NUP170	Auxin	19	0.402156	83.55
NUP133	3	NUP170	Auxin	20	0.414274	81.7175
NUP133	1	NUP170	Ethanol	21	0.311715	69.1061
NUP133	2	NUP170	Ethanol	19	0.319616	67.3668
NUP133	3	NUP170	Ethanol	21	0.304363	72.3154
NUP145C	1	NUP170	Auxin	6	0.369426	77.3934
NUP145C	2	NUP170	Auxin	6	0.350894	72.9001
NUP145C	3	NUP170	Auxin	6	0.359616	70.9358
NUP145C	1	NUP170	Ethanol	16	0.27244	60.399
NUP145C	2	NUP170	Ethanol	13	0.27244	57.4235
NUP145C	3	NUP170	Ethanol	13	0.250043	59.4092
NUP145N	1	NUP170	Auxin	6	0.387377	81.1541
NUP145N	2	NUP170	Auxin	6	0.361825	75.1709
NUP145N	3	NUP170	Auxin	6	0.385243	75.9909
NUP145N	1	NUP170	Ethanol	7	0.310147	68.7586
NUP145N	2	NUP170	Ethanol	8	0.320479	67.5487
NUP145N	3	NUP170	Ethanol	7	0.254243	60.4071
NUP157	1	NUP170	Auxin	17	0.374999	78.561
NUP157	2	NUP170	Auxin	20	0.366312	76.1032
NUP157	3	NUP170	Auxin	20	0.380618	75.0787
NUP157	1	NUP170	Ethanol	20	0.271875	60.2736
NUP157	2	NUP170	Ethanol	21	0.280172	59.0531
NUP157	3	NUP170	Ethanol	20	0.253624	60.2601
NUP159	1	NUP170	Auxin	11	0.412968	86.5153
NUP159	2	NUP170	Auxin	11	0.430835	89.5081
NUP159	3	NUP170	Auxin	12	0.44004	86.8
NUP159	1	NUP170	Ethanol	23	0.326848	72.461
NUP159	2	NUP170	Ethanol	20	0.34635	73.0018
NUP159	3	NUP170	Ethanol	21	0.316926	75.3005
NUP170	1	NUP170	Auxin	16	0.0845081	17.7041
NUP170	2	NUP170	Auxin	18	0.0793633	16.4881
NUP170	3	NUP170	Auxin	17	0.0877324	17.3056
NUP170	1	NUP170	Ethanol	21	0.0503731	11.1675
NUP170	2	NUP170	Ethanol	19	0.0489813	10.324
NUP170	3	NUP170	Ethanol	17	0.0524585	12.4639
NUP188	1	NUP170	Auxin	20	0.397078	83.1865
NUP188	2	NUP170	Auxin	21	0.384372	79.8552
NUP188	3	NUP170	Auxin	22	0.420479	82.9413
NUP188	1	NUP170	Ethanol	22	0.292258	64.7925
NUP188	2	NUP170	Ethanol	22	0.309794	65.2965
NUP188	3	NUP170	Ethanol	23	0.294809	70.0454
NUP192	1	NUP170	Auxin	24	0.413678	86.6641
NUP192	2	NUP170	Auxin	23	0.404399	84.0159
NUP192	3	NUP170	Auxin	24	0.426058	84.0419
NUP192	1	NUP170	Ethanol	28	0.323	71.6079
NUP192	2	NUP170	Ethanol	27	0.338423	71.3309
NUP192	3	NUP170	Ethanol	28	0.318346	75.6378
NUP2	1	NUP170	Auxin	9	0.451893	94.6699
NUP2	2	NUP170	Auxin	13	0.417142	86.6634
NUP2	3	NUP170	Auxin	14	0.442624	87.3096
NUP2	1	NUP170	Ethanol	13	0.341312	75.6676
NUP2	2	NUP170	Ethanol	12	0.344962	72.7092
NUP2	3	NUP170	Ethanol	13	0.328126	77.9616
NUP53	1	NUP170	Auxin	9	0.301099	63.0792
NUP53	2	NUP170	Auxin	10	0.304086	63.1753
NUP53	3	NUP170	Auxin	10	0.353555	69.7404
NUP53	1	NUP170	Ethanol	12	0.235169	52.1361
NUP53	2	NUP170	Ethanol	12	0.261725	55.1648
NUP53	3	NUP170	Ethanol	10	0.224372	53.31
NUP57	1	NUP170	Auxin	4	0.380327	79.6771
NUP57	2	NUP170	Auxin	5	0.37507	77.9227
NUP57	3	NUP170	Auxin	4	0.439605	86.7142
NUP57	1	NUP170	Ethanol	8	0.290703	64.4479
NUP57	2	NUP170	Ethanol	6	0.332287	70.0376
NUP57	3	NUP170	Ethanol	6	0.26735	63.5213
NUP60	1	NUP170	Auxin	8	0.396677	83.1023
NUP60	2	NUP170	Auxin	8	0.394502	81.9597
NUP60	3	NUP170	Auxin	8	0.437442	86.2874
NUP60	1	NUP170	Ethanol	10	0.317522	70.3934
NUP60	2	NUP170	Ethanol	11	0.31785	66.9946
NUP60	3	NUP170	Ethanol	10	0.300789	71.4663
NUP82	1	NUP170	Auxin	5	0.411637	86.2365
NUP82	2	NUP170	Auxin	6	0.424563	88.205
NUP82	3	NUP170	Auxin	6	0.431764	85.1674
NUP82	1	NUP170	Ethanol	7	0.325036	72.0594
NUP82	2	NUP170	Ethanol	7	0.319733	67.3915
NUP82	3	NUP170	Ethanol	5	0.299903	71.2559
NUP84	1	NUP170	Auxin	5	0.484193	101.437
NUP84	2	NUP170	Auxin	5	0.389254	80.8696
NUP84	3	NUP170	Auxin	5	0.39676	78.2627
NUP84	1	NUP170	Ethanol	6	0.313269	69.4506
NUP84	2	NUP170	Ethanol	6	0.329476	69.4451
NUP84	3	NUP170	Ethanol	6	0.342462	81.3677
NUP85	1	NUP170	Auxin	7	0.479365	100.425
NUP85	2	NUP170	Auxin	7	0.346916	72.0736
NUP85	3	NUP170	Auxin	7	0.438845	86.5643
NUP85	1	NUP170	Ethanol	7	0.268654	59.5596
NUP85	2	NUP170	Ethanol	7	0.342895	72.2734
NUP85	3	NUP170	Ethanol	7	0.296691	70.4928
POM152	1	NUP170	Auxin	42	0.381692	79.9631
POM152	2	NUP170	Auxin	42	0.376732	78.2681
POM152	3	NUP170	Auxin	44	0.383854	75.717
POM152	1	NUP170	Ethanol	42	0.298735	66.2284
POM152	2	NUP170	Ethanol	42	0.318915	67.2191
POM152	3	NUP170	Ethanol	41	0.294323	69.9301
POM34	1	NUP170	Auxin	4	0.388169	81.3199
POM34	2	NUP170	Auxin	5	0.412037	85.6028
POM34	3	NUP170	Auxin	5	0.434111	85.6305
POM34	1	NUP170	Ethanol	5	0.309671	68.653
POM34	2	NUP170	Ethanol	4	0.329779	69.509
POM34	3	NUP170	Ethanol	4	0.283069	67.2561
PSE1	1	NUP170	Auxin	3	0.471798	98.8401
PSE1	2	NUP170	Auxin	4	0.415549	86.3323
PSE1	3	NUP170	Auxin	3	0.462351	91.2009
PSE1	1	NUP170	Ethanol	4	0.450453	99.8639
PSE1	2	NUP170	Ethanol	5	0.440102	92.7622
PSE1	3	NUP170	Ethanol	4	0.411224	97.7054
SEC13	1	NUP170	Auxin	12	0.470904	98.6527
SEC13	2	NUP170	Auxin	13	0.485351	100.834
SEC13	3	NUP170	Auxin	13	0.502314	99.0839
SEC13	1	NUP170	Ethanol	13	0.446187	98.918
SEC13	2	NUP170	Ethanol	13	0.468502	98.7481
SEC13	3	NUP170	Ethanol	12	0.415831	98.7998
SEH1	1	NUP170	Auxin	6	0.485025	101.611
SEH1	2	NUP170	Auxin	8	0.500284	103.937
SEH1	3	NUP170	Auxin	8	0.520981	102.766
SEH1	1	NUP170	Ethanol	8	0.378428	83.8962
SEH1	2	NUP170	Ethanol	8	0.395901	83.4458
SEH1	3	NUP170	Ethanol	7	0.387975	92.1813
SRP1	1	NUP170	Auxin	7	0.469539	98.3667
SRP1	2	NUP170	Auxin	7	0.50619	105.164
SRP1	3	NUP170	Auxin	8	0.490945	96.8411
SRP1	1	NUP170	Ethanol	10	0.453485	100.536
SRP1	2	NUP170	Ethanol	10	0.46242	97.4662
SRP1	3	NUP170	Ethanol	8	0.418563	99.4491
