# Supplementary material for: An amphipathic helix in Brl1 is required for nuclear pore complex biogenesis in S. cerevisiae
Source: eLife. 2022 Aug 24;11:e78385. doi: 10.7554/eLife.78385 (PMC9402233; doi:10.7554/eLife.78385)
Supplement: Figure 4—source data 1. [file elife-78385-fig4-data1.xlsx]

## Sheet: Sheet1
Figure 4 - Source Data 1: Fractional labeling in Brl1-AID Nup170 APs with and without auxin treatment (relates to Figure 4)
*Median fractional labeling of all high quality precursors ions in Brl1-AID +OsTIR1 cells treated with auxin
**Median fractional labeling of all high quality precursors ions in Brl1-AID +OsTIR1 cells treated with the solvent control
Protein	TimePoint	Replicate	Bait	Assembly tier	Auxin labeling*	Ethanol labeling**	Ethanol/Auxin labeling ratio
KAP123	t240	1	NUP170	NTR	0.690053	0.734006	0.940119
KAP123	t240	2	NUP170	NTR	0.669283	0.716718	0.933816
KAP123	t240	3	NUP170	NTR	0.686139	0.708733	0.968121
KAP123	t270	1	NUP170	NTR	0.740785	0.781502	0.947898
KAP123	t270	2	NUP170	NTR	0.73161	0.765257	0.956032
KAP123	t270	3	NUP170	NTR	0.732558	0.764742	0.957915
KAP123	t300	1	NUP170	NTR	0.776402	0.798106	0.972806
KAP123	t300	2	NUP170	NTR	0.755589	0.80079	0.943554
KAP123	t300	3	NUP170	NTR	0.799905	0.796401	1.0044
KAP95	t240	1	NUP170	NTR	0.672981	0.695596	0.967489
KAP95	t240	2	NUP170	NTR	0.64863	0.697573	0.929839
KAP95	t240	3	NUP170	NTR	0.65935	0.697189	0.945727
KAP95	t270	1	NUP170	NTR	0.724864	0.765038	0.947488
KAP95	t270	2	NUP170	NTR	0.706653	0.732135	0.965195
KAP95	t270	3	NUP170	NTR	0.71998	0.73677	0.977212
KAP95	t300	1	NUP170	NTR	0.774656	0.797981	0.970771
KAP95	t300	2	NUP170	NTR	0.730782	0.783289	0.932966
KAP95	t300	3	NUP170	NTR	0.72293	0.778419	0.928715
MEX67	t240	1	NUP170	NTR	0.642996	0.696858	0.922707
MEX67	t240	2	NUP170	NTR	0.66327	0.685479	0.9676
MEX67	t240	3	NUP170	NTR	0.682117	0.684049	0.997175
MEX67	t270	1	NUP170	NTR	0.721116	0.773343	0.932466
MEX67	t270	2	NUP170	NTR	0.711139	0.75355	0.943718
MEX67	t270	3	NUP170	NTR	0.732002	0.738506	0.991193
MEX67	t300	1	NUP170	NTR	0.763224	0.778989	0.979762
MEX67	t300	2	NUP170	NTR	0.738717	0.795975	0.928066
MEX67	t300	3	NUP170	NTR	0.787944	0.770227	1.023
MLP1	t240	1	NUP170	late	0.543222	0.682876	0.79549
MLP1	t240	2	NUP170	late	0.520662	0.670236	0.776834
MLP1	t240	3	NUP170	late	0.619764	0.650442	0.952835
MLP1	t270	1	NUP170	late	0.580993	0.763034	0.761425
MLP1	t270	2	NUP170	late	0.602425	NA	NA
MLP1	t270	3	NUP170	late	0.602695	0.748824	0.804855
MLP1	t300	1	NUP170	late	0.615171	0.7762	0.792541
MLP1	t300	2	NUP170	late	0.640549	0.774455	0.827096
MLP1	t300	3	NUP170	late	0.703312	0.784682	0.896302
MLP2	t240	1	NUP170	late	0.661072	0.765305	0.863802
MLP2	t240	2	NUP170	late	0.649446	0.753247	0.862195
MLP2	t240	3	NUP170	late	0.706141	0.731438	0.965415
MLP2	t270	1	NUP170	late	0.713403	0.813778	0.876655
MLP2	t270	2	NUP170	late	0.716174	NA	NA
MLP2	t270	3	NUP170	late	0.707991	0.785658	0.901145
MLP2	t300	1	NUP170	late	0.745332	0.809095	0.921192
MLP2	t300	2	NUP170	late	0.736483	0.829992	0.887338
MLP2	t300	3	NUP170	late	0.768793	0.820717	0.936733
NIC96	t240	1	NUP170	early	0.599975	0.718791	0.8347
NIC96	t240	2	NUP170	early	0.578253	0.69343	0.833902
NIC96	t240	3	NUP170	early	0.625962	0.697541	0.897384
NIC96	t270	1	NUP170	early	0.648897	0.764769	0.848488
NIC96	t270	2	NUP170	early	0.636932	0.732561	0.869459
NIC96	t270	3	NUP170	early	0.673722	0.749759	0.898585
NIC96	t300	1	NUP170	early	0.7174	0.790739	0.907253
NIC96	t300	2	NUP170	early	0.684733	0.811025	0.844281
NIC96	t300	3	NUP170	early	0.731118	0.78853	0.927192
NUP1	t240	1	NUP170	intermediate	0.69705	0.750632	0.928617
NUP1	t240	2	NUP170	intermediate	0.678415	0.781266	0.868353
NUP1	t240	3	NUP170	intermediate	0.740097	0.74816	0.989223
NUP1	t270	1	NUP170	intermediate	0.744858	0.82452	0.903384
NUP1	t270	2	NUP170	intermediate	0.722414	0.814196	0.887272
NUP1	t270	3	NUP170	intermediate	0.769601	0.789517	0.974775
NUP1	t300	1	NUP170	intermediate	0.783077	0.834077	0.938856
NUP1	t300	2	NUP170	intermediate	0.773111	0.841839	0.91836
NUP1	t300	3	NUP170	intermediate	0.812895	0.830003	0.979388
NUP116	t240	1	NUP170	early	0.607868	0.695233	0.874338
NUP116	t240	2	NUP170	early	0.592205	0.689837	0.858471
NUP116	t240	3	NUP170	early	0.661728	0.720169	0.91885
NUP116	t270	1	NUP170	early	0.674575	0.762627	0.884542
NUP116	t270	2	NUP170	early	0.656362	0.794957	0.825657
NUP116	t270	3	NUP170	early	0.708983	0.770906	0.919674
NUP116	t300	1	NUP170	early	0.727649	0.80251	0.906716
NUP116	t300	2	NUP170	early	0.69985	0.799162	0.87573
NUP116	t300	3	NUP170	early	0.743522	0.803387	0.925484
NUP133	t240	1	NUP170	early	0.569308	0.65221	0.87289
NUP133	t240	2	NUP170	early	0.55623	0.669608	0.830681
NUP133	t240	3	NUP170	early	0.597444	0.659265	0.906227
NUP133	t270	1	NUP170	early	0.618576	0.739669	0.836287
NUP133	t270	2	NUP170	early	0.643102	0.753813	0.853132
NUP133	t270	3	NUP170	early	0.641406	0.724623	0.885158
NUP133	t300	1	NUP170	early	0.675476	0.767919	0.87962
NUP133	t300	2	NUP170	early	0.679358	0.770719	0.881459
NUP133	t300	3	NUP170	early	0.684845	0.769995	0.889414
NUP145C	t240	1	NUP170	early	0.595647	0.709854	0.839111
NUP145C	t240	2	NUP170	early	0.566442	0.72061	0.786059
NUP145C	t240	3	NUP170	early	0.624169	0.71938	0.867649
NUP145C	t270	1	NUP170	early	0.628465	0.79419	0.791328
NUP145C	t270	2	NUP170	early	0.639404	0.74419	0.859195
NUP145C	t270	3	NUP170	early	0.66017	0.756878	0.872228
NUP145C	t300	1	NUP170	early	0.694663	0.796242	0.872427
NUP145C	t300	2	NUP170	early	0.668151	0.808928	0.825971
NUP145C	t300	3	NUP170	early	0.698509	0.795739	0.877812
NUP157	t240	1	NUP170	early	0.620605	0.696485	0.891053
NUP157	t240	2	NUP170	early	0.612079	0.688897	0.888491
NUP157	t240	3	NUP170	early	0.646226	0.693126	0.932336
NUP157	t270	1	NUP170	early	0.679251	0.757953	0.896165
NUP157	t270	2	NUP170	early	0.664258	0.751377	0.884054
NUP157	t270	3	NUP170	early	0.672399	0.746375	0.900886
NUP157	t300	1	NUP170	early	0.720462	0.788105	0.91417
NUP157	t300	2	NUP170	early	0.712806	0.788622	0.903863
NUP157	t300	3	NUP170	early	0.721088	0.774758	0.930727
NUP159	t240	1	NUP170	intermediate	0.538295	0.673913	0.798761
NUP159	t240	2	NUP170	intermediate	0.533539	0.688201	0.775267
NUP159	t240	3	NUP170	intermediate	0.531144	0.666221	0.797248
NUP159	t270	1	NUP170	intermediate	0.594899	0.736577	0.807653
NUP159	t270	2	NUP170	intermediate	0.60665	0.722685	0.839439
NUP159	t270	3	NUP170	intermediate	0.598356	0.727433	0.822559
NUP159	t300	1	NUP170	intermediate	0.640947	0.771499	0.830781
NUP159	t300	2	NUP170	intermediate	0.641134	0.749994	0.854852
NUP159	t300	3	NUP170	intermediate	0.635084	0.760176	0.835443
NUP170	t240	1	NUP170	early	0.722632	0.789456	0.915354
NUP170	t240	2	NUP170	early	0.714804	0.787631	0.907537
NUP170	t240	3	NUP170	early	0.742532	0.778575	0.953706
NUP170	t270	1	NUP170	early	0.769243	0.824879	0.932552
NUP170	t270	2	NUP170	early	0.759785	0.823903	0.922178
NUP170	t270	3	NUP170	early	0.777964	0.818601	0.950359
NUP170	t300	1	NUP170	early	0.802126	0.847062	0.946951
NUP170	t300	2	NUP170	early	0.79436	0.8392	0.946568
NUP170	t300	3	NUP170	early	0.809393	0.844763	0.95813
NUP188	t240	1	NUP170	early	0.560931	0.635922	0.882076
NUP188	t240	2	NUP170	early	0.547395	0.655532	0.83504
NUP188	t240	3	NUP170	early	0.584616	0.621074	0.941298
NUP188	t270	1	NUP170	early	0.625777	0.699732	0.89431
NUP188	t270	2	NUP170	early	0.634917	0.735569	0.863165
NUP188	t270	3	NUP170	early	0.628025	0.685699	0.915889
NUP188	t300	1	NUP170	early	0.678992	0.749783	0.905585
NUP188	t300	2	NUP170	early	0.672976	0.750643	0.896534
NUP188	t300	3	NUP170	early	0.696815	0.736047	0.946699
NUP192	t240	1	NUP170	early	0.620502	0.700275	0.886083
NUP192	t240	2	NUP170	early	0.618249	0.713997	0.865899
NUP192	t240	3	NUP170	early	0.682331	0.702027	0.971944
NUP192	t270	1	NUP170	early	0.68592	0.764931	0.896708
NUP192	t270	2	NUP170	early	0.685826	0.79382	0.863957
NUP192	t270	3	NUP170	early	0.701742	0.757664	0.926191
NUP192	t300	1	NUP170	early	0.726165	0.798591	0.909309
NUP192	t300	2	NUP170	early	0.717056	0.793494	0.903669
NUP192	t300	3	NUP170	early	0.763833	0.791845	0.964624
NUP2	t240	1	NUP170	intermediate	0.657374	0.691261	0.950978
NUP2	t240	2	NUP170	intermediate	0.629241	0.685211	0.918317
NUP2	t240	3	NUP170	intermediate	0.6876	0.711435	0.966497
NUP2	t270	1	NUP170	intermediate	0.720191	0.775697	0.928445
NUP2	t270	2	NUP170	intermediate	0.682908	0.6584	1.03722
NUP2	t270	3	NUP170	intermediate	0.734407	0.761397	0.964552
NUP2	t300	1	NUP170	intermediate	0.747932	0.786958	0.950408
NUP2	t300	2	NUP170	intermediate	0.746926	0.779404	0.95833
NUP2	t300	3	NUP170	intermediate	0.769574	0.790107	0.974012
NUP53	t240	1	NUP170	early	0.703861	0.744595	0.945293
NUP53	t240	2	NUP170	early	0.682765	0.749596	0.910843
NUP53	t240	3	NUP170	early	0.717383	0.755083	0.950072
NUP53	t270	1	NUP170	early	0.749517	0.809199	0.926246
NUP53	t270	2	NUP170	early	0.73089	0.787801	0.927759
NUP53	t270	3	NUP170	early	0.762921	0.793184	0.961846
NUP53	t300	1	NUP170	early	0.777584	0.82493	0.942606
NUP53	t300	2	NUP170	early	0.770946	0.815624	0.945223
NUP53	t300	3	NUP170	early	0.794023	0.824724	0.962774
NUP57	t240	1	NUP170	early	0.586685	0.684692	0.856861
NUP57	t240	2	NUP170	early	0.573114	0.689684	0.830981
NUP57	t240	3	NUP170	early	0.620106	0.694303	0.893135
NUP57	t270	1	NUP170	early	0.642469	0.749513	0.857182
NUP57	t270	2	NUP170	early	0.651291	0.70997	0.917351
NUP57	t270	3	NUP170	early	0.670141	0.765989	0.874871
NUP57	t300	1	NUP170	early	0.695599	0.800772	0.86866
NUP57	t300	2	NUP170	early	0.68385	0.790679	0.86489
NUP57	t300	3	NUP170	early	0.71113	0.792896	0.896877
NUP82	t240	1	NUP170	intermediate	0.528874	0.641922	0.823891
NUP82	t240	2	NUP170	intermediate	0.526849	0.660941	0.797119
NUP82	t240	3	NUP170	intermediate	0.512373	0.636166	0.805408
NUP82	t270	1	NUP170	intermediate	0.601638	0.7161	0.840159
NUP82	t270	2	NUP170	intermediate	0.609062	0.732474	0.831514
NUP82	t270	3	NUP170	intermediate	0.595753	0.705604	0.844316
NUP82	t300	1	NUP170	intermediate	0.648445	0.75746	0.856077
NUP82	t300	2	NUP170	intermediate	0.625514	0.720787	0.867821
NUP82	t300	3	NUP170	intermediate	0.651442	0.747216	0.871826
NUP84	t240	1	NUP170	early	0.614021	0.702038	0.874627
NUP84	t240	2	NUP170	early	0.608749	0.703003	0.865928
NUP84	t240	3	NUP170	early	0.664951	0.67559	0.984252
NUP84	t270	1	NUP170	early	0.630909	0.777348	0.811617
NUP84	t270	2	NUP170	early	0.665515	0.707528	0.94062
NUP84	t270	3	NUP170	early	0.677183	0.744925	0.909062
NUP84	t300	1	NUP170	early	0.7026	0.782604	0.897773
NUP84	t300	2	NUP170	early	0.694936	0.765691	0.907593
NUP84	t300	3	NUP170	early	0.718005	0.761298	0.943133
POM152	t240	1	NUP170	early	0.666468	0.708402	0.940805
POM152	t240	2	NUP170	early	0.663254	0.729168	0.909604
POM152	t240	3	NUP170	early	0.67877	0.704206	0.963881
POM152	t270	1	NUP170	early	0.717745	0.779465	0.920818
POM152	t270	2	NUP170	early	0.708797	0.78248	0.905834
POM152	t270	3	NUP170	early	0.711465	0.750979	0.947383
POM152	t300	1	NUP170	early	0.744896	0.796392	0.935338
POM152	t300	2	NUP170	early	0.750478	0.800321	0.937722
POM152	t300	3	NUP170	early	0.749815	0.780683	0.960459
