# Supplementary material for: An amphipathic helix in Brl1 is required for nuclear pore complex biogenesis in S. cerevisiae
Source: eLife. 2022 Aug 24;11:e78385. doi: 10.7554/eLife.78385 (PMC9402233; doi:10.7554/eLife.78385)
Supplement: Figure 6—source data 1. [file elife-78385-fig6-data1.xlsx]

## Sheet: Brl1_raw
	WellF05_PointF05_0000_ChannelBF,GFP_BP_dual,mCherrydual_Seq0035.nd2_1_x	WellF05_PointF05_0000_ChannelBF,GFP_BP_dual,mCherrydual_Seq0035.nd2_1_I_GFP	WellF05_PointF05_0000_ChannelBF,GFP_BP_dual,mCherrydual_Seq0035.nd2_1_I_mCh	WellF05_PointF05_0000_ChannelBF,GFP_BP_dual,mCherrydual_Seq0035.nd2_2_x	WellF05_PointF05_0000_ChannelBF,GFP_BP_dual,mCherrydual_Seq0035.nd2_2_I_GFP	WellF05_PointF05_0000_ChannelBF,GFP_BP_dual,mCherrydual_Seq0035.nd2_2_I_mCh	WellF05_PointF05_0000_ChannelBF,GFP_BP_dual,mCherrydual_Seq0035.nd2_3_x	WellF05_PointF05_0000_ChannelBF,GFP_BP_dual,mCherrydual_Seq0035.nd2_3_I_GFP	WellF05_PointF05_0000_ChannelBF,GFP_BP_dual,mCherrydual_Seq0035.nd2_3_I_mCh	WellF05_PointF05_0000_ChannelBF,GFP_BP_dual,mCherrydual_Seq0035.nd2_4_x	WellF05_PointF05_0000_ChannelBF,GFP_BP_dual,mCherrydual_Seq0035.nd2_4_I_GFP	WellF05_PointF05_0000_ChannelBF,GFP_BP_dual,mCherrydual_Seq0035.nd2_4_I_mCh	WellF05_PointF05_0000_ChannelBF,GFP_BP_dual,mCherrydual_Seq0035.nd2_5_x	WellF05_PointF05_0000_ChannelBF,GFP_BP_dual,mCherrydual_Seq0035.nd2_5_I_GFP	WellF05_PointF05_0000_ChannelBF,GFP_BP_dual,mCherrydual_Seq0035.nd2_5_I_mCh	WellF05_PointF05_0000_ChannelBF,GFP_BP_dual,mCherrydual_Seq0035.nd2_6_x	WellF05_PointF05_0000_ChannelBF,GFP_BP_dual,mCherrydual_Seq0035.nd2_6_I_GFP	WellF05_PointF05_0000_ChannelBF,GFP_BP_dual,mCherrydual_Seq0035.nd2_6_I_mCh	WellF05_PointF05_0000_ChannelBF,GFP_BP_dual,mCherrydual_Seq0035.nd2_7_x	WellF05_PointF05_0000_ChannelBF,GFP_BP_dual,mCherrydual_Seq0035.nd2_7_I_GFP	WellF05_PointF05_0000_ChannelBF,GFP_BP_dual,mCherrydual_Seq0035.nd2_7_I_mCh	WellF05_PointF05_0000_ChannelBF,GFP_BP_dual,mCherrydual_Seq0035.nd2_8_x	WellF05_PointF05_0000_ChannelBF,GFP_BP_dual,mCherrydual_Seq0035.nd2_8_I_GFP	WellF05_PointF05_0000_ChannelBF,GFP_BP_dual,mCherrydual_Seq0035.nd2_8_I_mCh	WellF05_PointF05_0000_ChannelBF,GFP_BP_dual,mCherrydual_Seq0035.nd2_9_x	WellF05_PointF05_0000_ChannelBF,GFP_BP_dual,mCherrydual_Seq0035.nd2_9_I_GFP	WellF05_PointF05_0000_ChannelBF,GFP_BP_dual,mCherrydual_Seq0035.nd2_9_I_mCh	WellF05_PointF05_0000_ChannelBF,GFP_BP_dual,mCherrydual_Seq0035.nd2_10_x	WellF05_PointF05_0000_ChannelBF,GFP_BP_dual,mCherrydual_Seq0035.nd2_10_I_GFP	WellF05_PointF05_0000_ChannelBF,GFP_BP_dual,mCherrydual_Seq0035.nd2_10_I_mCh	WellF05_PointF05_0000_ChannelBF,GFP_BP_dual,mCherrydual_Seq0035.nd2_11_x	WellF05_PointF05_0000_ChannelBF,GFP_BP_dual,mCherrydual_Seq0035.nd2_11_I_GFP	WellF05_PointF05_0000_ChannelBF,GFP_BP_dual,mCherrydual_Seq0035.nd2_11_I_mCh	WellF05_PointF05_0000_ChannelBF,GFP_BP_dual,mCherrydual_Seq0035.nd2_12_x	WellF05_PointF05_0000_ChannelBF,GFP_BP_dual,mCherrydual_Seq0035.nd2_12_I_GFP	WellF05_PointF05_0000_ChannelBF,GFP_BP_dual,mCherrydual_Seq0035.nd2_12_I_mCh	WellF05_PointF05_0000_ChannelBF,GFP_BP_dual,mCherrydual_Seq0035.nd2_13_x	WellF05_PointF05_0000_ChannelBF,GFP_BP_dual,mCherrydual_Seq0035.nd2_13_I_GFP	WellF05_PointF05_0000_ChannelBF,GFP_BP_dual,mCherrydual_Seq0035.nd2_13_I_mCh	WellF05_PointF05_0000_ChannelBF,GFP_BP_dual,mCherrydual_Seq0035.nd2_14_x	WellF05_PointF05_0000_ChannelBF,GFP_BP_dual,mCherrydual_Seq0035.nd2_14_I_GFP	WellF05_PointF05_0000_ChannelBF,GFP_BP_dual,mCherrydual_Seq0035.nd2_14_I_mCh	WellF05_PointF05_0000_ChannelBF,GFP_BP_dual,mCherrydual_Seq0035.nd2_15_x	WellF05_PointF05_0000_ChannelBF,GFP_BP_dual,mCherrydual_Seq0035.nd2_15_I_GFP	WellF05_PointF05_0000_ChannelBF,GFP_BP_dual,mCherrydual_Seq0035.nd2_15_I_mCh	WellF05_PointF05_0000_ChannelBF,GFP_BP_dual,mCherrydual_Seq0035.nd2_16_x	WellF05_PointF05_0000_ChannelBF,GFP_BP_dual,mCherrydual_Seq0035.nd2_16_I_GFP	WellF05_PointF05_0000_ChannelBF,GFP_BP_dual,mCherrydual_Seq0035.nd2_16_I_mCh	WellF05_PointF05_0000_ChannelBF,GFP_BP_dual,mCherrydual_Seq0035.nd2_17_x
1	0	358	7110	0	344	6044	0	305	7463	0	313	6924	0	322	9825	0	360	10011	0	329	8267	0	313	6978	0	300	11950	0	333	5556	0	380	9605	0	352	4944	0	319	5909	0	321	4738	0	332	2849	0	342	5529	0
2	0.065	331.436	8376.37	0.065	323.462	6750.99	0.065	350.68	7774.19	0.065	323.291	8508.1	0.065	341.461	11100.7	0.065	355.642	11126.6	0.065	367.91	9060.11	0.065	353.668	7530.59	0.065	362.35	13923.5	0.065	371.818	6195.59	0.065	376.406	9870.85	0.065	334.55	5295.37	0.065	332.453	6564.15	0.065	321.122	5005.73	0.065	322.227	3112.42	0.065	347.496	6280.45	0.065
3	0.13	342.93	9979.13	0.13	320.569	7644.51	0.13	354.717	8151.42	0.13	367.959	10640.4	0.13	356.365	12301	0.13	352.167	12441.2	0.13	368.256	10455	0.13	339.667	8451.97	0.13	361.78	16105.3	0.13	379.749	7239.15	0.13	367.814	10585	0.13	325.36	6091.86	0.13	335.949	7223.48	0.13	322.775	5843.95	0.13	323.073	3581.48	0.13	383.455	6883.88	0.13
4	0.195	349.711	11887.7	0.195	381.25	8980.14	0.195	342.063	8595.35	0.195	358.809	14316.8	0.195	345.92	14082.8	0.195	358.82	13773.9	0.195	379.852	11879.5	0.195	319.526	9507.7	0.195	348.655	18208	0.195	375.577	8257.92	0.195	330.174	10874.4	0.195	297.637	7211.47	0.195	352.819	8078.88	0.195	312.615	7146.14	0.195	343.43	4213.24	0.195	377.268	8097.42	0.195
5	0.26	382.14	14630.7	0.26	376.432	11322	0.26	325.006	9302.85	0.26	363.69	19366.5	0.26	363.085	16903.6	0.26	390.426	15616.2	0.26	379.404	13400.3	0.26	361.952	10772.1	0.26	370.468	20780	0.26	433.889	9600.75	0.26	347.362	11219	0.26	349.598	8675.34	0.26	351.656	8911.47	0.26	384.348	8386.4	0.26	345.123	5013.26	0.26	349.151	9785.89	0.26
6	0.325	382.558	18120.7	0.325	364.632	13579.5	0.325	325.094	10204.3	0.325	375.616	25385.2	0.325	344.868	20407.1	0.325	376.883	17054	0.325	355.208	15764.9	0.325	378.793	12478.9	0.325	410.358	23253.5	0.325	419.639	11561.1	0.325	352.423	11737.8	0.325	352.862	10392.3	0.325	388.54	9975.9	0.325	346.672	9947.31	0.325	328.484	6016.31	0.325	370.885	12342	0.325
7	0.39	388.029	23312	0.39	433.291	16405.1	0.39	327.692	11250.3	0.39	420.948	31916.6	0.39	376.685	24377.2	0.39	405.635	18818.6	0.39	398.346	18742.9	0.39	360.918	15208.2	0.39	379.497	25804.4	0.39	400.491	14493.8	0.39	375.961	13015.3	0.39	367.425	12741.5	0.39	367.953	11266.2	0.39	361.087	12090.2	0.39	344.631	7408.29	0.39	384.202	16636.6	0.39
8	0.455	410.058	29745.7	0.455	430.673	19047.6	0.455	357.749	12786.9	0.455	430.671	39416	0.455	401.831	29241.8	0.455	390.074	21154	0.455	424.639	22274.7	0.455	357.386	19584.5	0.455	435.6	30742.9	0.455	391.118	17759.4	0.455	388.141	14683.3	0.455	377.561	17062.4	0.455	384.311	13810.8	0.455	370.137	16339.2	0.455	349.724	9739.14	0.455	380.666	23232.7	0.455
9	0.52	419.313	36886.8	0.52	416.713	21367.5	0.52	379.58	14819.7	0.52	457.098	45766.4	0.52	417.568	35166.1	0.52	436.14	24886.4	0.52	428.741	26995.6	0.52	412.486	25947.2	0.52	422.47	36562.5	0.52	428.14	21758.7	0.52	321.011	17440.7	0.52	411.354	23361.7	0.52	378.863	17463.5	0.52	366.364	22156.9	0.52	325.811	12913	0.52	427.87	31673.3	0.52
10	0.585	449.387	43074.3	0.585	404.876	24183	0.585	379.878	18019	0.585	459.669	51718.2	0.585	423.072	43077.2	0.585	445.892	30148.7	0.585	423.783	32619.1	0.585	414.413	34166.6	0.585	420.132	43562.7	0.585	453.264	27053.3	0.585	353.061	21653	0.585	432.146	31451.7	0.585	375.744	22836.3	0.585	366.192	30447.4	0.585	388.738	17465	0.585	454.066	41138.7	0.585
11	0.65	475.911	47973	0.65	445.519	27094.1	0.65	404.12	21320	0.65	504.326	56240	0.65	432.745	53227.6	0.65	509.628	35431.4	0.65	462.773	38156.7	0.65	408.975	43124.3	0.65	438.187	51124	0.65	452.767	33319.9	0.65	392.832	28124	0.65	435.591	40968.2	0.65	403.318	29472	0.65	343.174	39380.6	0.65	394.047	23534	0.65	458.684	49659.5	0.65
12	0.715	457.66	51882.8	0.715	426.798	31405.2	0.715	419.205	25054.1	0.715	448.813	60796.8	0.715	500.551	61959.5	0.715	506.391	41763.7	0.715	467.564	43594.4	0.715	424.99	51453.1	0.715	484.274	57962	0.715	536.568	39748.8	0.715	449.618	36755.6	0.715	459.135	48851.4	0.715	407.764	35963.4	0.715	397.13	47070.8	0.715	402.031	30951.6	0.715	536.005	55444.9	0.715
13	0.78	456.349	55636.8	0.78	430.643	36192.5	0.78	408.229	28919.2	0.78	486.557	64112.1	0.78	557.735	65535	0.78	488.115	46599.8	0.78	510.896	47994.2	0.78	421.603	57827	0.78	474.155	63219.1	0.78	536.37	46156.7	0.78	440.886	46170.1	0.78	466.065	53766.2	0.78	445.211	41249.2	0.78	410.687	51030.3	0.78	456.667	37984.6	0.78	526.267	60123	0.78
14	0.845	466.839	58938.3	0.845	477.476	38978.1	0.845	400.286	32560.9	0.845	475.26	65459.7	0.845	543.585	65535	0.845	476.271	49861.6	0.845	503.085	51495	0.845	478.375	61223.7	0.845	450.858	65492	0.845	547.247	52903.6	0.845	517.263	54715.7	0.845	441.633	56157.9	0.845	462.704	43786.3	0.845	417.857	53222.5	0.845	482.183	44062.4	0.845	532.906	61873.6	0.845
15	0.91	484.393	61338.4	0.91	468.878	42033.2	0.91	417.049	34943.5	0.91	515.572	65534.2	0.91	508.4	65535	0.91	511.062	52563.9	0.91	496.086	52425.5	0.91	502.705	63523.1	0.91	517.699	65535	0.91	625.972	58674.8	0.91	493.09	61866.3	0.91	442.761	57528.1	0.91	433.759	43946.9	0.91	416.862	52500.7	0.91	537.578	47202.7	0.91	540.274	63819	0.91
16	0.975	490.448	63854	0.975	441.824	43682.4	0.975	416.372	37156.1	0.975	444.868	65535	0.975	515.942	65535	0.975	491.782	51437.7	0.975	490.864	51231.7	0.975	502.643	63379.8	0.975	515.644	65499.5	0.975	616.348	63701.6	0.975	538.604	65298.8	0.975	457.467	58581	0.975	422.868	42530.5	0.975	416.89	52020.9	0.975	510.554	48413.1	0.975	559.586	65249.2	0.975
17	1.04	541.3	64104.1	1.04	443.532	43929.4	1.04	405.279	38680	1.04	464.182	65535	1.04	522.68	65535	1.04	469.345	49259.4	1.04	497.022	48434.8	1.04	478.796	61841.8	1.04	501.602	63630.2	1.04	640.125	65095.4	1.04	498.368	65534	1.04	454.681	59756.1	1.04	416.564	39110.6	1.04	420.491	50599.6	1.04	501.467	48869.1	1.04	575.597	65535	1.04
18	1.105	532.753	62112	1.105	445.105	42619.5	1.105	449.423	38557.4	1.105	521.561	65535	1.105	504.607	65535	1.105	503.931	45845	1.105	470.425	44013.3	1.105	499.367	57994.1	1.105	503.014	60018.1	1.105	617.656	65535	1.105	528.709	65535	1.105	439.443	62398.8	1.105	413.39	33846.6	1.105	438.713	47408.2	1.105	496.576	47907.8	1.105	584.569	65535	1.105
19	1.17	492.281	58360.7	1.17	425.121	40258	1.17	416.671	37306.7	1.17	467.317	63851.2	1.17	498.196	60972.6	1.17	449.104	40443.2	1.17	460.278	39602	1.17	429.547	53191.9	1.17	460.518	55830.6	1.17	588.774	65535	1.17	517.346	65535	1.17	462.973	63295.6	1.17	437.63	28412.2	1.17	419.888	42083.8	1.17	517.199	45076.1	1.17	537.236	64080.5	1.17
20	1.235	520.383	52923	1.235	409.045	36051.2	1.235	405.588	34771.4	1.235	481.284	60576.3	1.235	475.711	52959.8	1.235	462.876	35545.5	1.235	463.473	35451.4	1.235	442.568	46448.9	1.235	487.894	50651.4	1.235	665.797	65535	1.235	513.314	65535	1.235	490.57	61936.4	1.235	408.514	24327.7	1.235	439.239	34834.3	1.235	532.707	40632.9	1.235	530.464	59006.2	1.235
21	1.3	482.568	47710.7	1.3	393.827	30881.6	1.3	435.639	32019.9	1.3	507.444	55922.5	1.3	454.582	44463.5	1.3	493.581	31654.8	1.3	476.291	32096.8	1.3	438.882	40581.7	1.3	502.068	45598.2	1.3	659.524	61432.4	1.3	532.352	63978.5	1.3	475.128	58186.8	1.3	377.534	20825.7	1.3	411.026	27231.6	1.3	469.281	34516	1.3	513.823	52620.5	1.3
22	1.365	494.807	42923.6	1.365	385.5	25311.9	1.365	457.029	28794.8	1.365	462.53	50328.9	1.365	450.151	36797.3	1.365	494.41	29037.4	1.365	406.292	29978.4	1.365	406.003	36434.9	1.365	455.934	41099.2	1.365	592.746	54246.3	1.365	495.721	59239.2	1.365	432.976	51116.9	1.365	391.026	19205.6	1.365	417.378	21265.1	1.365	498.776	27590.3	1.365	447.366	44457.7	1.365
23	1.43	478.318	39248.1	1.43	395.124	20222.8	1.43	400.478	25769.7	1.43	433.929	44868	1.43	433.857	31893	1.43	455.25	27118.8	1.43	432.695	28385.6	1.43	382.599	33491.2	1.43	446.137	37529.4	1.43	539.993	46172.7	1.43	480.719	53124.3	1.43	437.903	43500.5	1.43	398.454	18194.9	1.43	403.642	18023	1.43	437.52	21882.2	1.43	444.006	37304.6	1.43
24	1.495	469.603	36003.3	1.495	396.668	16048.3	1.495	380.377	22998.6	1.495	406.71	39265.7	1.495	454.914	29515.3	1.495	437.283	25716.4	1.495	429.548	27837	1.495	414.378	31456.5	1.495	449.41	34623.6	1.495	552.941	39141.3	1.495	521.137	48143.8	1.495	426.471	36760	1.495	392.573	17644.7	1.495	412.174	15732.6	1.495	403.43	17508.1	1.495	456.544	32259.8	1.495
25	1.56	458.054	33252.8	1.56	367.915	13169.2	1.56	384.587	21096	1.56	388.595	34987.6	1.56	439.972	28417.6	1.56	392.6	24445.8	1.56	432.077	26887.8	1.56	418.999	30170.3	1.56	419.608	32682.5	1.56	537.902	33753.7	1.56	470.351	44127.8	1.56	411.334	31111.5	1.56	383.091	17018.6	1.56	373.499	14227.6	1.56	389.946	14272.7	1.56	459.454	28388.9	1.56
26	1.625	441.284	30646.6	1.625	379.172	11652.6	1.625	392.184	19467.7	1.625	420.643	31229.1	1.625	436.112	27571.2	1.625	411.235	23874.9	1.625	411.87	25759.6	1.625	412.791	29013.6	1.625	394.379	30748.7	1.625	517.985	29716.9	1.625	499.733	40978	1.625	407.694	27000.9	1.625	382.888	16237.8	1.625	362.665	12542.4	1.625	360.505	12085.7	1.625	454.825	25284.9	1.625
27	1.69	476.242	28761.2	1.69	372.154	10759.5	1.69	443.441	18149.7	1.69	424.23	28160.1	1.69	413.048	26408.2	1.69	405.167	23523.3	1.69	402.169	25145.4	1.69	393.69	28129.5	1.69	399.442	29404	1.69	501.617	26730.3	1.69	429.636	38107.7	1.69	389.24	23027.7	1.69	394.332	15859.3	1.69	391.499	11484.3	1.69	383.863	10419.2	1.69	436.083	23164.9	1.69
28	1.755	451.185	26856.1	1.755	385.634	10198.1	1.755	415.748	17375.1	1.755	382.801	26018.3	1.755	405.636	24785.1	1.755	424.731	23352.9	1.755	397.525	24452.3	1.755	403.001	27359.4	1.755	416.884	28388	1.755	478.448	24271.4	1.755	433.314	34700.9	1.755	406.914	20870.7	1.755	378.25	15446	1.755	393.46	11022.9	1.755	361.696	8850.41	1.755	432.051	21906.9	1.755
29	1.82	398.48	24928.6	1.82	396.731	9701.29	1.82	425.245	16806.7	1.82	385.027	24870.6	1.82	411.939	23331.8	1.82	410.795	22689.7	1.82	400.506	23831.4	1.82	398.542	27222.2	1.82	418.698	27638.7	1.82	461.601	22089.7	1.82	441.94	31988.4	1.82	402.709	18897.8	1.82	372.859	14757	1.82	381.462	10430.7	1.82	382.078	8143.95	1.82	441.1	20772.8	1.82
30	0	0	0	1.885	373.473	9371.85	1.885	391.915	15971.8	1.885	375.557	23150.6	1.885	373.333	21375.4	0	0	0	1.885	394.04	23128.6	0	0	0	1.885	434.533	26695.1	1.885	498.428	20488.4	1.885	444.212	29237.5	1.885	398.557	17871.9	1.885	389.917	14005.9	1.885	389.655	9926.7	1.885	360.093	7327.56	1.885	395.075	19371.7	1.885
31	0	0	0	1.95	372.561	8929	0	0	0	1.95	385.458	22342.7	1.95	374.011	19107.6	0	0	0	1.95	431.132	22428.8	0	0	0	0	0	0	1.95	487.852	19236	1.95	432.952	26823.2	1.95	379.05	16257	1.95	393.649	13692.3	0	0	0	1.95	364.704	6886.91	1.95	394.159	18213.9	1.95
32	0	0	0	2.015	378.328	8763.8	0	0	0	2.015	356.661	21240.5	0	0	0	0	0	0	2.015	429.877	22093.8	0	0	0	0	0	0	2.015	464.311	18240.3	2.015	439.842	24735.7	0	0	0	2.015	361.071	13195.9	0	0	0	2.015	361.842	6418.48	2.015	388.107	17458.4	2.015
33	0	0	0	2.08	370.514	8700.37	0	0	0	2.08	375.43	20938.8	0	0	0	0	0	0	2.08	412.058	21884.6	0	0	0	0	0	0	2.08	441.829	17162.1	2.08	426.933	22691.4	0	0	0	2.08	335.518	13124.5	0	0	0	2.08	358.018	5864.76	2.08	367.352	16439.2	2.08
34	0	0	0	2.145	372.523	8617.25	0	0	0	0	0	0	0	0	0	0	0	0	2.145	422.94	21082.2	0	0	0	0	0	0	2.145	391.862	15846.5	2.145	375.559	21210.1	0	0	0	0	0	0	0	0	0	2.145	375.481	5638.58	2.145	400.563	15583.8	2.145
35	0	0	0	2.21	377.114	8658.65	0	0	0	0	0	0	0	0	0	0	0	0	2.21	393.191	20478.7	0	0	0	0	0	0	2.21	423.844	15124.9	2.21	386.735	19800.8	0	0	0	0	0	0	0	0	0	2.21	348.557	5433.98	2.21	391.017	15149	2.21
36	0	0	0	0	0	0	0	0	0	0	0	0	0	0	0	0	0	0	0	0	0	0	0	0	0	0	0	2.275	441.365	14152.5	2.275	420.995	18041.6	0	0	0	0	0	0	0	0	0	0	0	0	2.275	379.406	14219.4	2.275
37	0	0	0	0	0	0	0	0	0	0	0	0	0	0	0	0	0	0	0	0	0	0	0	0	0	0	0	2.34	429.521	13095.9	2.34	440.379	17367.4	0	0	0	0	0	0	0	0	0	0	0	0	0	0	0	2.34
38	0	0	0	0	0	0	0	0	0	0	0	0	0	0	0	0	0	0	0	0	0	0	0	0	0	0	0	2.405	444.577	12322.5	2.405	373.713	16427.5	0	0	0	0	0	0	0	0	0	0	0	0	0	0	0	2.405
39	0	0	0	0	0	0	0	0	0	0	0	0	0	0	0	0	0	0	0	0	0	0	0	0	0	0	0	0	0	0	2.47	445.376	15431.5	0	0	0	0	0	0	0	0	0	0	0	0	0	0	0	2.47
40	0	0	0	0	0	0	0	0	0	0	0	0	0	0	0	0	0	0	0	0	0	0	0	0	0	0	0	0	0	0	2.535	403.993	14650.3	0	0	0	0	0	0	0	0	0	0	0	0	0	0	0	2.535
41	0	0	0	0	0	0	0	0	0	0	0	0	0	0	0	0	0	0	0	0	0	0	0	0	0	0	0	0	0	0	2.6	392.172	13761.1	0	0	0	0	0	0	0	0	0	0	0	0	0	0	0	0
42	0	0	0	0	0	0	0	0	0	0	0	0	0	0	0	0	0	0	0	0	0	0	0	0	0	0	0	0	0	0	2.665	386.987	13076.3	0	0	0	0	0	0	0	0	0	0	0	0	0	0	0	0
43	0	0	0	0	0	0	0	0	0	0	0	0	0	0	0	0	0	0	0	0	0	0	0	0	0	0	0	0	0	0	2.73	394.906	12818	0	0	0	0	0	0	0	0	0	0	0	0	0	0	0	0
44	0	0	0	0	0	0	0	0	0	0	0	0	0	0	0	0	0	0	0	0	0	0	0	0	0	0	0	0	0	0	0	0	0	0	0	0	0	0	0	0	0	0	0	0	0	0	0	0	0
45	0	0	0	0	0	0	0	0	0	0	0	0	0	0	0	0	0	0	0	0	0	0	0	0	0	0	0	0	0	0	0	0	0	0	0	0	0	0	0	0	0	0	0	0	0	0	0	0	0
46	0	0	0	0	0	0	0	0	0	0	0	0	0	0	0	0	0	0	0	0	0	0	0	0	0	0	0	0	0	0	0	0	0	0	0	0	0	0	0	0	0	0	0	0	0	0	0	0	0
47	0	0	0	0	0	0	0	0	0	0	0	0	0	0	0	0	0	0	0	0	0	0	0	0	0	0	0	0	0	0	0	0	0	0	0	0	0	0	0	0	0	0	0	0	0	0	0	0	0
[truncated: 116 more columns]

## Sheet: Brl1_normalized
	WellF05_PointF05_0000_ChannelBF,GFP_BP_dual,mCherrydual_Seq0035.nd2_1_x	WellF05_PointF05_0000_ChannelBF,GFP_BP_dual,mCherrydual_Seq0035.nd2_1_I_GFP	WellF05_PointF05_0000_ChannelBF,GFP_BP_dual,mCherrydual_Seq0035.nd2_1_I_mCh	WellF05_PointF05_0000_ChannelBF,GFP_BP_dual,mCherrydual_Seq0035.nd2_2_x	WellF05_PointF05_0000_ChannelBF,GFP_BP_dual,mCherrydual_Seq0035.nd2_2_I_GFP	WellF05_PointF05_0000_ChannelBF,GFP_BP_dual,mCherrydual_Seq0035.nd2_2_I_mCh	WellF05_PointF05_0000_ChannelBF,GFP_BP_dual,mCherrydual_Seq0035.nd2_3_x	WellF05_PointF05_0000_ChannelBF,GFP_BP_dual,mCherrydual_Seq0035.nd2_3_I_GFP	WellF05_PointF05_0000_ChannelBF,GFP_BP_dual,mCherrydual_Seq0035.nd2_3_I_mCh	WellF05_PointF05_0000_ChannelBF,GFP_BP_dual,mCherrydual_Seq0035.nd2_4_x	WellF05_PointF05_0000_ChannelBF,GFP_BP_dual,mCherrydual_Seq0035.nd2_4_I_GFP	WellF05_PointF05_0000_ChannelBF,GFP_BP_dual,mCherrydual_Seq0035.nd2_4_I_mCh	WellF05_PointF05_0000_ChannelBF,GFP_BP_dual,mCherrydual_Seq0035.nd2_5_x	WellF05_PointF05_0000_ChannelBF,GFP_BP_dual,mCherrydual_Seq0035.nd2_5_I_GFP	WellF05_PointF05_0000_ChannelBF,GFP_BP_dual,mCherrydual_Seq0035.nd2_5_I_mCh	WellF05_PointF05_0000_ChannelBF,GFP_BP_dual,mCherrydual_Seq0035.nd2_16_x	WellF05_PointF05_0000_ChannelBF,GFP_BP_dual,mCherrydual_Seq0035.nd2_16_I_GFP	WellF05_PointF05_0000_ChannelBF,GFP_BP_dual,mCherrydual_Seq0035.nd2_18_x	WellF05_PointF05_0000_ChannelBF,GFP_BP_dual,mCherrydual_Seq0035.nd2_18_I_GFP	WellF05_PointF05_0000_ChannelBF,GFP_BP_dual,mCherrydual_Seq0035.nd2_18_I_mCh	WellF05_PointF05_0000_ChannelBF,GFP_BP_dual,mCherrydual_Seq0035.nd2_19_x	WellF05_PointF05_0000_ChannelBF,GFP_BP_dual,mCherrydual_Seq0035.nd2_19_I_GFP	WellF05_PointF05_0000_ChannelBF,GFP_BP_dual,mCherrydual_Seq0035.nd2_23_x	WellF05_PointF05_0000_ChannelBF,GFP_BP_dual,mCherrydual_Seq0035.nd2_23_I_GFP	WellF05_PointF05_0000_ChannelBF,GFP_BP_dual,mCherrydual_Seq0035.nd2_23_I_mCh	WellF05_PointF05_0001_ChannelBF,GFP_BP_dual,mCherrydual_Seq0036.nd2_1_x	WellF05_PointF05_0001_ChannelBF,GFP_BP_dual,mCherrydual_Seq0036.nd2_1_I_GFP	WellF05_PointF05_0001_ChannelBF,GFP_BP_dual,mCherrydual_Seq0036.nd2_6_x	WellF05_PointF05_0001_ChannelBF,GFP_BP_dual,mCherrydual_Seq0036.nd2_6_I_GFP	WellF05_PointF05_0001_ChannelBF,GFP_BP_dual,mCherrydual_Seq0036.nd2_6_I_mCh	WellF05_PointF05_0001_ChannelBF,GFP_BP_dual,mCherrydual_Seq0036.nd2_9_x	WellF05_PointF05_0001_ChannelBF,GFP_BP_dual,mCherrydual_Seq0036.nd2_9_I_GFP	WellF05_PointF05_0001_ChannelBF,GFP_BP_dual,mCherrydual_Seq0036.nd2_9_I_mCh	WellF05_PointF05_0003_ChannelBF,GFP_BP_dual,mCherrydual_Seq0038.nd2_2_x	WellF05_PointF05_0003_ChannelBF,GFP_BP_dual,mCherrydual_Seq0038.nd2_2_I_GFP	WellF05_PointF05_0003_ChannelBF,GFP_BP_dual,mCherrydual_Seq0038.nd2_2_I_mCh	WellF05_PointF05_0003_ChannelBF,GFP_BP_dual,mCherrydual_Seq0038.nd2_5_x	WellF05_PointF05_0003_ChannelBF,GFP_BP_dual,mCherrydual_Seq0038.nd2_5_I_GFP	WellF05_PointF05_0003_ChannelBF,GFP_BP_dual,mCherrydual_Seq0038.nd2_7_x	WellF05_PointF05_0003_ChannelBF,GFP_BP_dual,mCherrydual_Seq0038.nd2_7_I_GFP	WellF05_PointF05_0003_ChannelBF,GFP_BP_dual,mCherrydual_Seq0038.nd2_11_x	WellF05_PointF05_0003_ChannelBF,GFP_BP_dual,mCherrydual_Seq0038.nd2_11_I_GFP	WellF05_PointF05_0003_ChannelBF,GFP_BP_dual,mCherrydual_Seq0038.nd2_11_I_mCh	WellF05_PointF05_0003_ChannelBF,GFP_BP_dual,mCherrydual_Seq0038.nd2_12_x	WellF05_PointF05_0003_ChannelBF,GFP_BP_dual,mCherrydual_Seq0038.nd2_12_I_GFP	WellF05_PointF05_0003_ChannelBF,GFP_BP_dual,mCherrydual_Seq0038.nd2_12_I_mCh	WellF05_PointF05_0003_ChannelBF,GFP_BP_dual,mCherrydual_Seq0038.nd2_13_x	WellF05_PointF05_0003_ChannelBF,GFP_BP_dual,mCherrydual_Seq0038.nd2_13_I_GFP	WellF05_PointF05_0003_ChannelBF,GFP_BP_dual,mCherrydual_Seq0038.nd2_13_I_mCh
1	0	358	7110	0	344	6044	0	305	7463	0	313	6924	0	322	9825	0	342	0	363	8067	0	380	0	334	7576	0	340	0	331	5931	0	403	9137	0	362	5019	0	290	0	350	0	414	18507	0	356	6389	0	312	5888
2	0.065	331.436	8376.37	0.065	323.462	6750.99	0.065	350.68	7774.19	0.065	323.291	8508.1	0.065	341.461	11100.7	0.065	347.496	0.065	369.772	8783.89	0.065	309.727	0.065	390	8510	0.065	330.272	0.065	354.215	6664.06	0.065	379.281	10489.1	0.065	350.674	5279.4	0.065	329.939	0.065	369.465	0.065	327.339	19668.7	0.065	360.067	7360.51	0.065	360.121	6112.52
3	0.13	342.93	9979.13	0.13	320.569	7644.51	0.13	354.717	8151.42	0.13	367.959	10640.4	0.13	356.365	12301	0.13	383.455	0.13	381.227	9931.95	0.13	424.833	0.13	360	9844	0.13	367.614	0.13	348.267	7505.72	0.13	398.2	12041.8	0.13	344.875	5587.92	0.13	328.437	0.13	377.586	0.13	391.601	20756.8	0.13	374.466	8049.93	0.13	354.615	6704.65
4	0.195	349.711	11887.7	0.195	381.25	8980.14	0.195	342.063	8595.35	0.195	358.809	14316.8	0.195	345.92	14082.8	0.195	377.268	0.195	385.555	11024.5	0.195	404.913	0.195	362	11236	0.195	368.463	0.195	346.765	8512.17	0.195	404.984	14390.1	0.195	346.191	5820.4	0.195	343.082	0.195	407.378	0.195	408.233	21553.9	0.195	367.489	9160.28	0.195	383.136	7089.22
5	0.26	382.14	14630.7	0.26	376.432	11322	0.26	325.006	9302.85	0.26	363.69	19366.5	0.26	363.085	16903.6	0.26	349.151	0.26	410.059	12394.6	0.26	401.986	0.26	388	13096	0.26	361.168	0.26	373.164	9861.19	0.26	427.576	16917.3	0.26	353.474	6789.89	0.26	360.012	0.26	450.694	0.26	393.98	23243.2	0.26	333.978	9762.5	0.26	348.94	8285.28
6	0.325	382.558	18120.7	0.325	364.632	13579.5	0.325	325.094	10204.3	0.325	375.616	25385.2	0.325	344.868	20407.1	0.325	370.885	0.325	397.501	14065.1	0.325	373.71	0.325	421	14917	0.325	347.991	0.325	371.164	11196.9	0.325	448.089	21014.2	0.325	351.448	7499.31	0.325	341.165	0.325	411.395	0.325	404.403	25319.2	0.325	362.03	10927.1	0.325	326.403	9348.43
7	0.39	388.029	23312	0.39	433.291	16405.1	0.39	327.692	11250.3	0.39	420.948	31916.6	0.39	376.685	24377.2	0.39	384.202	0.39	425.826	16859.6	0.39	440.063	0.39	442	17383	0.39	371.362	0.39	368.396	12735.6	0.39	440.079	25962	0.39	347.052	8897.49	0.39	342.445	0.39	418.757	0.39	424.877	27953.7	0.39	384.709	12633.1	0.39	398.671	11109.9
8	0.455	410.058	29745.7	0.455	430.673	19047.6	0.455	357.749	12786.9	0.455	430.671	39416	0.455	401.831	29241.8	0.455	380.666	0.455	408.685	20717.1	0.455	395.063	0.455	435	21125	0.455	385.167	0.455	353.344	14509	0.455	444.017	31781.7	0.455	369.861	10983.5	0.455	346.174	0.455	393.411	0.455	419.763	30457.3	0.455	399.537	14680	0.455	423.099	13228.2
9	0.52	419.313	36886.8	0.52	416.713	21367.5	0.52	379.58	14819.7	0.52	457.098	45766.4	0.52	417.568	35166.1	0.52	427.87	0.52	469.553	26074.5	0.52	446.337	0.52	467	25551	0.52	376.532	0.52	388.249	16591.5	0.52	468.085	38629.4	0.52	348.245	14159.2	0.52	354.192	0.52	397.343	0.52	444.011	33525.6	0.52	424.831	17549.2	0.52	380.019	16544.2
10	0.585	449.387	43074.3	0.585	404.876	24183	0.585	379.878	18019	0.585	459.669	51718.2	0.585	423.072	43077.2	0.585	454.066	0.585	495.178	31786.6	0.585	484.159	0.585	424	32043	0.585	367.829	0.585	402.153	18985.2	0.585	423.196	45479.4	0.585	391.315	18375.5	0.585	384.956	0.585	409.64	0.585	437.894	36649.5	0.585	460.029	21487.1	0.585	398.436	22056.5
11	0.65	475.911	47973	0.65	445.519	27094.1	0.65	404.12	21320	0.65	504.326	56240	0.65	432.745	53227.6	0.65	458.684	0.65	467.699	36884	0.65	532.121	0.65	499	42880	0.65	374.212	0.65	404.538	21846.5	0.65	549.773	52902.3	0.65	428.8	23662.4	0.65	382.238	0.65	411.937	0.65	436.895	40515.1	0.65	455.41	25974.7	0.65	482.23	30633.5
12	0.715	457.66	51882.8	0.715	426.798	31405.2	0.715	419.205	25054.1	0.715	448.813	60796.8	0.715	500.551	61959.5	0.715	536.005	0.715	502.071	40975.5	0.715	545.385	0.715	553	55030	0.715	403.521	0.715	453.779	25198.9	0.715	610.654	59786.6	0.715	405.853	29338.6	0.715	393.537	0.715	460.144	0.715	436.383	44151.1	0.715	491.146	32643.5	0.715	511.74	40769.9
13	0.78	456.349	55636.8	0.78	430.643	36192.5	0.78	408.229	28919.2	0.78	486.557	64112.1	0.78	557.735	65535	0.78	526.267	0.78	486.3	41989.4	0.78	576.41	0.78	670	65535	0.78	418.418	0.78	487.962	28646.2	0.78	605.722	63434.7	0.78	409.436	33927.4	0.78	392.251	0.78	465.079	0.78	486.138	48332.5	0.78	506.204	39676.5	0.78	585.003	51804.7
14	0.845	466.839	58938.3	0.845	477.476	38978.1	0.845	400.286	32560.9	0.845	475.26	65459.7	0.845	543.585	65535	0.845	532.906	0.845	512.148	43394.8	0.845	561.475	0.845	687	65535	0.845	428.349	0.845	482.635	32070.4	0.845	601.826	65191.4	0.845	444.699	36814.3	0.845	388.63	0.845	512.761	0.845	458.574	52002.1	0.845	492.714	46100.1	0.845	594.591	60856.5
15	0.91	484.393	61338.4	0.91	468.878	42033.2	0.91	417.049	34943.5	0.91	515.572	65534.2	0.91	508.4	65535	0.91	540.274	0.91	527.023	44236.7	0.91	561.459	0.91	664	65535	0.91	491.361	0.91	458.348	35084.7	0.91	613.979	65409.8	0.91	443.799	36811	0.91	443.916	0.91	518.698	0.91	455.708	55709.1	0.91	499.686	51371	0.91	545.316	65509.8
16	0.975	490.448	63854	0.975	441.824	43682.4	0.975	416.372	37156.1	0.975	444.868	65535	0.975	515.942	65535	0.975	559.586	0.975	528.433	45597.1	0.975	532.447	0.975	697	65535	0.975	498.313	0.975	430.979	37279.5	0.975	611.563	63920.3	0.975	421.914	35839.7	0.975	445.566	0.975	512.174	0.975	470.557	57248.1	0.975	526.671	54752.1	0.975	617.334	65535
17	1.04	541.3	64104.1	1.04	443.532	43929.4	1.04	405.279	38680	1.04	464.182	65535	1.04	522.68	65535	1.04	575.597	1.04	528.501	47691.2	1.04	543.131	1.04	777	65535	1.04	514.944	1.04	503.715	38657	1.04	611.363	60236.9	1.04	444.061	32557	1.04	432.208	1.04	498.088	1.04	476.649	57476.3	1.04	520.253	57456.5	1.04	607.838	65535
18	1.105	532.753	62112	1.105	445.105	42619.5	1.105	449.423	38557.4	1.105	521.561	65535	1.105	504.607	65535	1.105	584.569	1.105	544.053	49132.3	1.105	527.287	1.105	732	65535	1.105	512.682	1.105	474.482	39145.2	1.105	562.23	55335.7	1.105	403.364	28693.9	1.105	448.652	1.105	534.981	1.105	518.846	56993	1.105	563.309	60323.8	1.105	599.383	65535
19	1.17	492.281	58360.7	1.17	425.121	40258	1.17	416.671	37306.7	1.17	467.317	63851.2	1.17	498.196	60972.6	1.17	537.236	1.17	538.717	49279.5	1.17	521.013	1.17	663	65535	1.17	517.951	1.17	497.697	39071.1	1.17	562.797	49463.9	1.17	422.357	25167.3	1.17	486.035	1.17	501.07	1.17	523.152	54822.7	1.17	552.987	62388.5	1.17	603.472	65535
20	1.235	520.383	52923	1.235	409.045	36051.2	1.235	405.588	34771.4	1.235	481.284	60576.3	1.235	475.711	52959.8	1.235	530.464	1.235	556.158	47630.6	1.235	468.664	1.235	678	65535	1.235	569.78	1.235	503.579	38216.9	1.235	518.174	43592.2	1.235	411.473	22242.5	1.235	452.195	1.235	484.166	1.235	496.243	50782.1	1.235	510.373	63203.8	1.235	574.861	65535
21	1.3	482.568	47710.7	1.3	393.827	30881.6	1.3	435.639	32019.9	1.3	507.444	55922.5	1.3	454.582	44463.5	1.3	513.823	1.3	509.763	44049.7	1.3	481.676	1.3	604	63588	1.3	519.562	1.3	531.425	36765.1	1.3	533.193	38918.8	1.3	401.212	20370.7	1.3	469.762	1.3	464.469	1.3	461.513	47225.8	1.3	486.996	63301.5	1.3	539.837	63423.7
22	1.365	494.807	42923.6	1.365	385.5	25311.9	1.365	457.029	28794.8	1.365	462.53	50328.9	1.365	450.151	36797.3	1.365	447.366	1.365	512.792	39435.1	1.365	457.319	1.365	558	55140	1.365	587.501	1.365	488.906	35301.6	1.365	514.182	34955.7	1.365	399.829	19209.1	1.365	462.378	1.365	450.864	1.365	477.09	43639.6	1.365	462.395	60253.5	1.365	480.556	54244.1
23	1.43	478.318	39248.1	1.43	395.124	20222.8	1.43	400.478	25769.7	1.43	433.929	44868	1.43	433.857	31893	1.43	444.006	1.43	518.448	35084.6	1.43	460.453	1.43	581	46731	1.43	592.444	1.43	452.074	33884	1.43	494.09	31681.1	1.43	402.075	17753.2	1.43	500.586	1.43	421.521	1.43	467.179	40998.9	1.43	483.095	55840.3	1.43	479.103	43570.4
24	1.495	469.603	36003.3	1.495	396.668	16048.3	1.495	380.377	22998.6	1.495	406.71	39265.7	1.495	454.914	29515.3	1.495	456.544	1.495	466.993	30949.3	1.495	438.071	1.495	608	39908	1.495	559.491	1.495	424.142	32108.4	1.495	471.907	28746.2	1.495	389.529	16812.4	1.495	416.716	1.495	417.808	1.495	477.219	38770.4	1.495	466.501	50710.9	1.495	450.889	34200
25	1.56	458.054	33252.8	1.56	367.915	13169.2	1.56	384.587	21096	1.56	388.595	34987.6	1.56	439.972	28417.6	1.56	459.454	1.56	455.176	27737	1.56	464.538	1.56	522	34322	1.56	547.102	1.56	414.332	30800.7	1.56	469.679	26202.1	1.56	397.298	15848.1	1.56	353.266	1.56	395.846	1.56	477.242	37138.2	1.56	463.274	45501.2	1.56	438.458	25938.6
26	1.625	441.284	30646.6	1.625	379.172	11652.6	1.625	392.184	19467.7	1.625	420.643	31229.1	1.625	436.112	27571.2	1.625	454.825	1.625	448.948	25164.8	1.625	427.049	1.625	545	30080	1.625	541.616	1.625	449.112	29166.6	1.625	448.979	24173.9	1.625	407.155	14577.1	1.625	410.845	1.625	411.122	1.625	460.847	35599.4	1.625	421.427	40538.8	1.625	442.896	20181.9
27	1.69	476.242	28761.2	1.69	372.154	10759.5	1.69	443.441	18149.7	1.69	424.23	28160.1	1.69	413.048	26408.2	1.69	436.083	1.69	430.458	23276.5	1.69	423.853	1.69	491	27142	1.69	514.804	1.69	445.16	27514	1.69	441.664	22461.6	1.69	370.548	13651.4	1.69	396.159	1.69	408.384	1.69	466.245	34093.3	1.69	385.576	35788.8	1.69	454.534	16583.1
28	1.755	451.185	26856.1	1.755	385.634	10198.1	1.755	415.748	17375.1	1.755	382.801	26018.3	1.755	405.636	24785.1	1.755	432.051	1.755	450.102	21110.8	1.755	412.652	1.755	494	24130	1.755	487.252	1.755	411.972	25914.7	1.755	390.24	20495.8	1.755	375.828	12961.9	1.755	424.02	1.755	392.79	1.755	441.73	32665.4	1.755	421.888	31476.8	1.755	387.236	14908.3
29	1.82	398.48	24928.6	1.82	396.731	9701.29	1.82	425.245	16806.7	1.82	385.027	24870.6	1.82	411.939	23331.8	1.82	441.1	1.82	429.712	19722.5	1.82	435.593	1.82	484	21953	1.82	516.028	1.82	413.648	24202.6	1.82	423.965	19027.5	1.82	396.806	12290.6	1.82	419.1	1.82	389.771	1.82	450.488	31407.2	1.82	420.14	27515.8	1.82	385.128	13945.1
30	0	0	0	1.885	373.473	9371.85	1.885	391.915	15971.8	1.885	375.557	23150.6	1.885	373.333	21375.4	1.885	395.075	1.885	427.341	18461.7	1.885	433.939	1.885	492	20648	1.885	501.87	1.885	415.572	22766.8	1.885	406.142	17616.7	1.885	383	11594	1.885	395.339	1.885	401.165	1.885	450.206	30890.2	1.885	427.225	24065.7	1.885	398.679	13853.3
31	0	0	0	1.95	372.561	8929	0	0	0	1.95	385.458	22342.7	1.95	374.011	19107.6	1.95	394.159	1.95	405.659	17326.9	1.95	457.65	1.95	461	18436	1.95	480.645	1.95	447.137	21055.5	1.95	443.41	16569.5	0	0	0	1.95	446.113	0	0	1.95	436.855	29790.5	1.95	398.858	21410.3	1.95	442.313	13347.3
32	0	0	0	2.015	378.328	8763.8	0	0	0	2.015	356.661	21240.5	0	0	0	2.015	388.107	2.015	406.571	16352.6	2.015	433.011	2.015	423	16876	2.015	468.869	2.015	390.079	19521.7	2.015	404.931	15280	0	0	0	2.015	405.693	0	0	2.015	451.054	28560.4	2.015	376.958	19279.9	2.015	425.641	13174.4
33	0	0	0	2.08	370.514	8700.37	0	0	0	2.08	375.43	20938.8	0	0	0	2.08	367.352	2.08	399.258	15705.8	2.08	382.19	2.08	482	15389	2.08	478.781	2.08	379.878	18334.9	2.08	409.884	14183.2	0	0	0	2.08	396.482	0	0	2.08	474.291	27850	2.08	409.676	17649.4	2.08	396.49	13468.5
34	0	0	0	2.145	372.523	8617.25	0	0	0	0	0	0	0	0	0	2.145	400.563	2.145	399.188	15227.5	2.145	380.743	2.145	399	14196	2.145	448.269	2.145	421.106	16948	2.145	432.119	13287.1	0	0	0	2.145	396.887	0	0	2.145	453.822	27101.3	2.145	413.291	16346	2.145	399.32	13649.7
35	0	0	0	2.21	377.114	8658.65	0	0	0	0	0	0	0	0	0	2.21	391.017	2.21	424.173	14794.2	2.21	391.374	2.21	437	12739	2.21	414.294	2.21	401.949	15478.7	0	0	0	0	0	0	2.21	379.519	0	0	2.21	434.161	26108.3	2.21	374.996	15451.2	2.21	413.776	13536.2
36	0	0	0	0	0	0	0	0	0	0	0	0	0	0	0	2.275	379.406	2.275	428.647	14343	2.275	375.205	2.275	428	11692	2.275	426.623	2.275	389.796	14102.5	0	0	0	0	0	0	2.275	370.414	0	0	2.275	430.584	25309.6	2.275	355.791	14971.6	2.275	388.629	13346.9
37	0	0	0	0	0	0	0	0	0	0	0	0	0	0	0	0	0	2.34	403.36	13749.7	0	0	2.34	441	10242	2.34	430.765	2.34	371.142	12960.5	0	0	0	0	0	0	0	0	0	0	0	0	0	2.34	412.028	14411.1	2.34	466.863	13418
38	0	0	0	0	0	0	0	0	0	0	0	0	0	0	0	0	0	2.405	406.125	13757.1	0	0	2.405	477	9293	2.405	431.619	2.405	375.783	11872.5	0	0	0	0	0	0	0	0	0	0	0	0	0	0	0	0	0	0	0
39	0	0	0	0	0	0	0	0	0	0	0	0	0	0	0	0	0	2.47	407.401	13775.8	0	0	2.47	413	8423	2.47	439.068	2.47	371.697	10776.5	0	0	0	0	0	0	0	0	0	0	0	0	0	0	0	0	0	0	0
40	0	0	0	0	0	0	0	0	0	0	0	0	0	0	0	0	0	2.535	359.75	13546.3	0	0	2.535	448	7734	2.535	423.143	0	0	0	0	0	0	0	0	0	0	0	0	0	0	0	0	0	0	0	0	0	0
41	0	0	0	0	0	0	0	0	0	0	0	0	0	0	0	0	0	0	0	0	0	0	2.6	390	7157	0	0	0	0	0	0	0	0	0	0	0	0	0	0	0	0	0	0	0	0	0	0	0	0
42	0	0	0	0	0	0	0	0	0	0	0	0	0	0	0	0	0	0	0	0	0	0	0	0	0	0	0	0	0	0	0	0	0	0	0	0	0	0	0	0	0	0	0	0	0	0	0	0	0
43	0	0	0	0	0	0	0	0	0	0	0	0	0	0	0	0	0	0	0	0	0	0	0	0	0	0	0	0	0	0	0	0	0	0	0	0	0	0	0	0	0	0	0	0	0	0	0	0	0
44	0	0	0	0	0	0	0	0	0	0	0	0	0	0	0	0	0	0	0	0	0	0	0	0	0	0	0	0	0	0	0	0	0	0	0	0	0	0	0	0	0	0	0	0	0	0	0	0	0
45	0	0	0	0	0	0	0	0	0	0	0	0	0	0	0	0	0	0	0	0	0	0	0	0	0	0	0	0	0	0	0	0	0	0	0	0	0	0	0	0	0	0	0	0	0	0	0	0	0
46	0	0	0	0	0	0	0	0	0	0	0	0	0	0	0	0	0	0	0	0	0	0	0	0	0	0	0	0	0	0	0	0	0	0	0	0	0	0	0	0	0	0	0	0	0	0	0	0	0
47	0	0	0	0	0	0	0	0	0	0	0	0	0	0	0	0	0	0	0	0	0	0	0	0	0	0	0	0	0	0	0	0	0	0	0	0	0	0	0	0	0	0	0	0	0	0	0	0	0
0	358	344	305	313	322	360	329	313	300	333	380	352	319	321	332	342	320	363	380	351	386	404	334	340	377	366	353	331	325	340	403	379	335	362	332	405	290	433	350	315	414	356	312	328	351	349	325	321	392
0.065	331.436	323.462	350.68	323.291	341.461	355.642	367.91	353.668	362.35	371.818	376.406	334.55	332.453	321.122	322.227	347.496	362.877	369.772	309.727	353.032	363.031	381.64	390	330.272	361.736	352.75	341.525	354.215	399.801	376.567	379.281	364.614	348.84	350.674	345.733	376.509	329.939	368.777	369.465	310.045	327.339	360.067	360.121	316.983	342.444	322.672	350.014	329.138	434.143
0.13	342.93	320.569	354.717	367.959	356.365	352.167	368.256	339.667	361.78	379.749	367.814	325.36	335.949	322.775	323.073	383.455	348.398	381.227	424.833	366.459	347.386	387.973	360	367.614	319.348	362.861	363.236	348.267	401.24	352.963	398.2	384.968	378.696	344.875	320.806	410.596	328.437	384.577	377.586	342.318	391.601	374.466	354.615	331.294	336.076	362.515	337.133	310.604	387.051
0.195	349.711	381.25	342.063	358.809	345.92	358.82	379.852	319.526	348.655	375.577	330.174	297.637	352.819	312.615	343.43	377.268	353.763	385.555	404.913	381.315	374.256	383.091	362	368.463	351.987	374.727	358.523	346.765	345.261	316.381	404.984	387.459	370.636	346.191	351.416	411.903	343.082	451.051	407.378	333.738	408.233	367.489	383.136	367.836	353.567	390.579	375.123	349.398	416.252
0.26	382.14	376.432	325.006	363.69	363.085	390.426	379.404	361.952	370.468	433.889	347.362	349.598	351.656	384.348	345.123	349.151	373.789	410.059	401.986	379.127	372.426	447.612	388	361.168	381.047	390.231	367.812	373.164	352.803	358.731	427.576	423.145	354.34	353.474	380.68	428.43	360.012	469.813	450.694	339.364	393.98	333.978	348.94	360.566	381.047	385.926	388.706	358.649	428.641
0.325	382.558	364.632	325.094	375.616	344.868	376.883	355.208	378.793	410.358	419.639	352.423	352.862	388.54	346.672	328.484	370.885	361.294	397.501	373.71	389.987	396.111	456.449	421	347.991	379.838	357.39	322.588	371.164	353.793	371.69	448.089	451.372	397.596	351.448	377.805	403.181	341.165	441.433	411.395	316.657	404.403	362.03	326.403	346.902	346.412	391.331	406.534	349.327	433.145
0.39	388.029	433.291	327.692	420.948	376.685	405.635	398.346	360.918	379.497	400.491	375.961	367.425	367.953	361.087	344.631	384.202	355.848	425.826	440.063	404.05	349.229	424.053	442	371.362	402.351	362.089	340.871	368.396	382.825	393.948	440.079	481.874	407.662	347.052	377.792	410.377	342.445	444.995	418.757	338.555	424.877	384.709	398.671	349.326	361.435	366.534	411.689	332.351	413.469
0.455	410.058	430.673	357.749	430.671	401.831	390.074	424.639	357.386	435.6	391.118	388.141	377.561	384.311	370.137	349.724	380.666	401.257	408.685	395.063	392.684	364.686	473.199	435	385.167	419.003	392.055	377.433	353.344	360.207	396.393	444.017	509.599	380.721	369.861	405.107	441.069	346.174	466.764	393.411	398.807	419.763	399.537	423.099	371.18	399.696	354.794	403.974	357.598	422.856
0.52	419.313	416.713	379.58	457.098	417.568	436.14	428.741	412.486	422.47	428.14	321.011	411.354	378.863	366.364	325.811	427.87	435.174	469.553	446.337	404.851	359.606	504.407	467	376.532	441.759	381.766	383.706	388.249	402.015	382.144	468.085	509.326	414.013	348.245	397.423	435.291	354.192	489.097	397.343	369.019	444.011	424.831	380.019	371.065	436.58	407.36	402.962	393.374	497.681
0.585	449.387	404.876	379.878	459.669	423.072	445.892	423.783	414.413	420.132	453.264	353.061	432.146	375.744	366.192	388.738	454.066	453.118	495.178	484.159	426.287	383.579	523.302	424	367.829	407.694	391.576	392.863	402.153	438.342	412.009	423.196	565.335	434.455	391.315	411.942	457.1	384.956	480.953	409.64	370.43	437.894	460.029	398.436	389.147	425.196	379.813	417.77	407.858	483.774
0.65	475.911	445.519	404.12	504.326	432.745	509.628	462.773	408.975	438.187	452.767	392.832	435.591	403.318	343.174	394.047	458.684	465.069	467.699	532.121	435.076	431.238	517.564	499	374.212	457.529	411.069	415.348	404.538	439.613	459.521	549.773	554.917	457.55	428.8	447.176	460.82	382.238	532.646	411.937	369.687	436.895	455.41	482.23	417.355	397.067	422.143	441.201	421.463	585.426
0.715	457.66	426.798	419.205	448.813	500.551	506.391	467.564	424.99	484.274	536.568	449.618	459.135	407.764	397.13	402.031	536.005	512.003	502.071	545.385	430.077	412.801	570.378	553	403.521	447.775	468.554	451.925	453.779	438.134	419.204	610.654	580.632	418.059	405.853	438.469	530.625	393.537	545.853	460.144	374.486	436.383	491.146	511.74	452.454	457.249	437.333	477.329	445.097	619.861
0.78	456.349	430.643	408.229	486.557	557.735	488.115	510.896	421.603	474.155	536.37	440.886	466.065	445.211	410.687	456.667	526.267	539.257	486.3	576.41	439.271	403.171	580.798	670	418.418	443.927	483.078	405.265	487.962	497.603	489.291	605.722	594.877	491.811	409.436	440.934	533.76	392.251	553.032	465.079	364.406	486.138	506.204	585.003	425.579	460.338	483.236	517.401	471.452	636.295
0.845	466.839	477.476	400.286	475.26	543.585	476.271	503.085	478.375	450.858	547.247	517.263	441.633	462.704	417.857	482.183	532.906	610.338	512.148	561.475	465.102	453.244	602.732	687	428.349	489.504	489.545	441.901	482.635	514.108	489.038	601.826	577.955	461.253	444.699	444.897	547.415	388.63	555.184	512.761	387.925	458.574	492.714	594.591	500.783	434.385	465.355	528.957	494.694	648.428
0.91	484.393	468.878	417.049	515.572	508.4	511.062	496.086	502.705	517.699	625.972	493.09	442.761	433.759	416.862	537.578	540.274	533.882	527.023	561.459	460.985	488.069	620.865	664	491.361	524.271	471.048	460.475	458.348	460.88	506.12	613.979	634.071	491.271	443.799	474.195	533.98	443.916	546.401	518.698	394.834	455.708	499.686	545.316	488.119	477.88	479.437	531.573	526.831	675.149
0.975	490.448	441.824	416.372	444.868	515.942	491.782	490.864	502.643	515.644	616.348	538.604	457.467	422.868	416.89	510.554	559.586	557.424	528.433	532.447	393.742	483.694	624.246	697	498.313	520.143	484.882	455.072	430.979	463.69	535.107	611.563	604.708	478.073	421.914	445.77	540.562	445.566	531.651	512.174	401.348	470.557	526.671	617.334	454.572	501.777	479.29	537.848	538.274	612.493
1.04	541.3	443.532	405.279	464.182	522.68	469.345	497.022	478.796	501.602	640.125	498.368	454.681	416.564	420.491	501.467	575.597	586.803	528.501	543.131	397.2	481.938	609.784	777	514.944	493.664	517.791	446.079	503.715	486.221	536.056	611.363	568.75	481.183	444.061	479.053	569.256	432.208	541.839	498.088	445.621	476.649	520.253	607.838	506.985	432.899	498.256	529.241	535.712	600.464
1.105	532.753	445.105	449.423	521.561	504.607	503.931	470.425	499.367	503.014	617.656	528.709	439.443	413.39	438.713	496.576	584.569	592.262	544.053	527.287	414.861	530.233	643.632	732	512.682	513.078	492.232	451.034	474.482	512.196	546.283	562.23	518.988	484.853	403.364	502.824	505.702	448.652	563.42	534.981	463.095	518.846	563.309	599.383	499.074	435.912	503.463	523.281	498.536	576.237
1.17	492.281	425.121	416.671	467.317	498.196	449.104	460.278	429.547	460.518	588.774	517.346	462.973	437.63	419.888	517.199	537.236	567.667	538.717	521.013	450.006	518.554	661.385	663	517.951	541.844	458.329	444.311	497.697	469.964	601.846	562.797	492.042	461.419	422.357	492.297	554.071	486.035	560.338	501.07	518.228	523.152	552.987	603.472	466.831	441.102	543.59	508.789	504.574	561.332
1.235	520.383	409.045	405.588	481.284	475.711	462.876	463.473	442.568	487.894	665.797	513.314	490.57	408.514	439.239	532.707	530.464	590.635	556.158	468.664	427.565	488.829	615.871	678	569.78	516.594	460.929	435.477	503.579	430.452	585.616	518.174	477.947	418.553	411.473	478.03	559.83	452.195	564.049	484.166	505.739	496.243	510.373	574.861	455.705	423.269	516.846	542.016	502.541	498.725
1.3	482.568	393.827	435.639	507.444	454.582	493.581	476.291	438.882	502.068	659.524	532.352	475.128	377.534	411.026	469.281	513.823	543.84	509.763	481.676	424.176	445.736	573.027	604	519.562	489.569	457.168	422.044	531.425	440.456	561.536	533.193	454.797	432.441	401.212	480.776	545.41	469.762	486.713	464.469	538.301	461.513	486.996	539.837	449.497	418.839	443.36	585.137	481.499	479.528
1.365	494.807	385.5	457.029	462.53	450.151	494.41	406.292	406.003	455.934	592.746	495.721	432.976	391.026	417.378	498.776	447.366	515.285	512.792	457.319	406.445	466.606	565.232	558	587.501	437.08	464.454	412.526	488.906	443.998	531.394	514.182	442.401	412.998	399.829	471.515	542.596	462.378	495.755	450.864	577.582	477.09	462.395	480.556	401.514	390.768	403.507	560.906	437.304	508.514
1.43	478.318	395.124	400.478	433.929	433.857	455.25	432.695	382.599	446.137	539.993	480.719	437.903	398.454	403.642	437.52	444.006	497.349	518.448	460.453	438.302	460.979	508.874	581	592.444	437.529	426.982	415.34	452.074	425.707	556.019	494.09	435.733	433.747	402.075	427.361	482.151	500.586	471.25	421.521	524.211	467.179	483.095	479.103	436.979	417.286	440.552	498.302	420.818	557.412
1.495	469.603	396.668	380.377	406.71	454.914	437.283	429.548	414.378	449.41	552.941	521.137	426.471	392.573	412.174	403.43	456.544	488.355	466.993	438.071	409.188	407.137	506.82	608	559.491	449.123	425.649	423.167	424.142	434.911	509.14	471.907	408.036	436.653	389.529	430.696	540.026	416.716	488.569	417.808	560.064	477.219	466.501	450.889	433.04	436.503	440.238	495.651	405.683	471.43
1.56	458.054	367.915	384.587	388.595	439.972	392.6	432.077	418.999	419.608	537.902	470.351	411.334	383.091	373.499	389.946	459.454	503.527	455.176	464.538	403.537	415.79	472.39	522	547.102	478.694	425.932	367.782	414.332	405.612	490.671	469.679	429.395	435.464	397.298	428.538	491	353.266	432.338	395.846	551.673	477.242	463.274	438.458	396.531	414.545	429.543	483.566	377.15	484.616
1.625	441.284	379.172	392.184	420.643	436.112	411.235	411.87	412.791	394.379	517.985	499.733	407.694	382.888	362.665	360.505	454.825	482.543	448.948	427.049	403.761	435.272	436.922	545	541.616	457.013	431.45	391.704	449.112	407.808	455.866	448.979	433.831	416.948	407.155	418.8	501.688	410.845	419.221	411.122	558.306	460.847	421.427	442.896	396.445	413.257	446.802	474.279	417.369	513.397
1.69	476.242	372.154	443.441	424.23	413.048	405.167	402.169	393.69	399.442	501.617	429.636	389.24	394.332	391.499	383.863	436.083	463.053	430.458	423.853	393.635	416.827	398.492	491	514.804	455.447	400.832	424.534	445.16	401.002	478.396	441.664	415.742	383.042	370.548	412.039	510.265	396.159	419.298	408.384	538.354	466.245	385.576	454.534	377.325	410.951	427.682	482.251	428.842	465.196
1.755	451.185	385.634	415.748	382.801	405.636	424.731	397.525	403.001	416.884	478.448	433.314	406.914	378.25	393.46	361.696	432.051	437.343	450.102	412.652	388.684	415.119	427.565	494	487.252	438.25	449.683	374.251	411.972	0	475.325	390.24	410.886	424.191	375.828	423.255	506.92	424.02	497.994	392.79	535.166	441.73	421.888	387.236	400.401	413.936	424.761	479.148	388.164	515.92
1.82	398.48	396.731	425.245	385.027	411.939	410.795	400.506	398.542	418.698	461.601	441.94	402.709	372.859	381.462	382.078	441.1	427.011	429.712	435.593	372.824	416.885	456.104	484	516.028	412.572	429.639	386.093	413.648	0	409.671	423.965	0	408.381	396.806	424.896	466.163	419.1	432.926	389.771	509.934	450.488	420.14	385.128	394.637	415.352	418.574	428.304	398.025	412.489
1.885	0	373.473	391.915	375.557	373.333	0	394.04	0	434.533	498.428	444.212	398.557	389.917	389.655	360.093	395.075	456.662	427.341	433.939	384	398.877	401.413	492	501.87	392.841	382.173	411.165	415.572	0	398.315	406.142	0	398.591	383	388.844	440.625	395.339	409.826	401.165	518.755	450.206	427.225	398.679	342.185	388.296	417.97	457.694	401.995	449.447
1.95	0	372.561	0	385.458	374.011	0	431.132	0	0	487.852	432.952	379.05	393.649	0	364.704	394.159	446.713	405.659	457.65	0	407.656	431.732	461	480.645	449.54	389.023	376.414	447.137	0	447.066	443.41	0	375.824	0	397.118	453.897	446.113	432.669	0	519.738	436.855	398.858	442.313	365.992	382.222	395.562	466.463	378.561	425.428
2.015	0	378.328	0	356.661	0	0	429.877	0	0	464.311	439.842	0	361.071	0	361.842	388.107	417.28	406.571	433.011	0	408.325	438.655	423	468.869	419.886	381.564	377.212	390.079	0	419.318	404.931	0	397.122	0	395.039	458.987	405.693	374.623	0	490.867	451.054	376.958	425.641	377.751	366.017	0	437.941	378.644	0
2.08	0	370.514	0	375.43	0	0	412.058	0	0	441.829	426.933	0	335.518	0	358.018	367.352	444.686	399.258	382.19	0	378.615	441.517	482	478.781	421.591	385.517	388.526	379.878	0	389.645	409.884	0	395.485	0	388.922	492.065	396.482	387.312	0	469.84	474.291	409.676	396.49	0	381.924	0	466.005	364.839	0
2.145	0	372.523	0	0	0	0	422.94	0	0	391.862	375.559	0	0	0	375.481	400.563	435.478	399.188	380.743	0	358.484	452.397	399	448.269	420.531	411.187	401.393	421.106	0	382.17	432.119	0	0	0	0	443.782	396.887	433.547	0	442.194	453.822	413.291	399.32	0	366.846	0	428.52	372.117	0
2.21	0	377.114	0	0	0	0	393.191	0	0	423.844	386.735	0	0	0	348.557	391.017	389.798	424.173	391.374	0	383.186	417.458	437	414.294	405.01	399.222	379.556	401.949	0	429.212	0	0	0	0	0	411.392	379.519	443.798	0	449.987	434.161	374.996	413.776	0	367.787	0	371.462	380.79	0
2.275	0	0	0	0	0	0	0	0	0	441.365	420.995	0	0	0	0	379.406	396.758	428.647	375.205	0	409.484	0	428	426.623	414.565	0	367.745	389.796	0	386.959	0	0	0	0	0	456.373	370.414	0	0	436.953	430.584	355.791	388.629	0	381.748	0	418.933	0	0
2.34	0	0	0	0	0	0	0	0	0	429.521	440.379	0	0	0	0	0	400.471	403.36	0	0	394.199	0	441	430.765	0	0	0	371.142	0	377.961	0	0	0	0	0	441.227	0	0	0	432.467	0	412.028	466.863	0	423.218	0	402.273	0	0
2.405	0	0	0	0	0	0	0	0	0	444.577	373.713	0	0	0	0	0	392.877	406.125	0	0	379.642	0	477	431.619	0	0	0	375.783	0	432.263	0	0	0	0	0	0	0	0	0	444.353	0	0	0	0	382.918	0	420.891	0	0
2.47	0	0	0	0	0	0	0	0	0	0	445.376	0	0	0	0	0	384.059	407.401	0	0	397.827	0	413	439.068	0	0	0	371.697	0	393.54	0	0	0	0	0	0	0	0	0	412.705	0	0	0	0	317.58	0	0	0	0
2.535	0	0	0	0	0	0	0	0	0	0	403.993	0	0	0	0	0	395.638	359.75	0	0	411.797	0	448	423.143	0	0	0	0	0	0	0	0	0	0	0	0	0	0	0	421.226	0	0	0	0	0	0	0	0	0
2.6	0	0	0	0	0	0	0	0	0	0	392.172	0	0	0	0	0	0	0	0	0	380.804	0	390	0	0	0	0	0	0	0	0	0	0	0	0	0	0	0	0	448.395	0	0	0	0	0	0	0	0	0
2.665	0	0	0	0	0	0	0	0	0	0	386.987	0	0	0	0	0	0	0	0	0	0	0	0	0	0	0	0	0	0	0	0	0	0	0	0	0	0	0	0	441.068	0	0	0	0	0	0	0	0	0
2.73	0	0	0	0	0	0	0	0	0	0	394.906	0	0	0	0	0	0	0	0	0	0	0	0	0	0	0	0	0	0	0	0	0	0	0	0	0	0	0	0	410.121	0	0	0	0	0	0	0	0	0
2.795	0	0	0	0	0	0	0	0	0	0	0	0	0	0	0	0	0	0	0	0	0	0	0	0	0	0	0	0	0	0	0	0	0	0	0	0	0	0	0	430.544	0	0	0	0	0	0	0	0	0
2.86	0	0	0	0	0	0	0	0	0	0	0	0	0	0	0	0	0	0	0	0	0	0	0	0	0	0	0	0	0	0	0	0	0	0	0	0	0	0	0	441.039	0	0	0	0	0	0	0	0	0
2.925	0	0	0	0	0	0	0	0	0	0	0	0	0	0	0	0	0	0	0	0	0	0	0	0	0	0	0	0	0	0	0	0	0	0	0	0	0	0	0	403.683	0	0	0	0	0	0	0	0	0
2.99	0	0	0	0	0	0	0	0	0	0	0	0	0	0	0	0	0	0	0	0	0	0	0	0	0	0	0	0	0	0	0	0	0	0	0	0	0	0	0	405.804	0	0	0	0	0	0	0	0	0
0	7110	6044	7463	6924	9825	10011	8267	6978	11950	5556	9605	4944	5909	4738	2849	5529	5811	8067	12170	8325	13147	15449	7576	6297	7926	5785	5560	5931	5839	5203	9137	9488	12104	5019	13395	11841	7113	11789	9762	4884	18507	6389	5888	5719	5415	7228	6189	4636	6720
0.065	8376.37	6750.99	7774.19	8508.1	11100.7	11126.6	9060.11	7530.59	13923.5	6195.59	9870.85	5295.37	6564.15	5005.73	3112.42	6280.45	6308.93	8783.89	13986.1	8962.28	14428.3	15135.3	8510	6794.22	8821.84	6667.45	6251.77	6664.06	6633.5	6035.4	10489.1	11788.3	13639.5	5279.4	14769.1	12720.5	7831.92	12491.8	10984	5200.76	19668.7	7360.51	6112.52	6614.72	5818	7791.63	6885.8	5073.93	7198.93
0.13	9979.13	7644.51	8151.42	10640.4	12301	12441.2	10455	8451.97	16105.3	7239.15	10585	6091.86	7223.48	5843.95	3581.48	6883.88	7175.5	9931.95	15496.2	10116.6	15437.9	15000.4	9844	7538.1	9662.23	7460.9	7085.39	7505.72	7648.34	6807.72	12041.8	14252.9	15675.2	5587.92	16214.1	13803.1	8443.41	13109.8	12421	5727.75	20756.8	8049.93	6704.65	7642.16	6342.7	8716.55	7548.96	5767.47	7639.7
0.195	11887.7	8980.14	8595.35	14316.8	14082.8	13773.9	11879.5	9507.7	18208	8257.92	10874.4	7211.47	8078.88	7146.14	4213.24	8097.42	8201.57	11024.5	17708.6	11712.4	16699.7	15310.5	11236	8396.09	10576.9	8482.03	8035.05	8512.17	9350.88	7723.78	14390.1	16745.1	17970	5820.4	17866.9	15942.7	9090.11	14523.3	13889	6183.09	21553.9	9160.28	7089.22	8811.76	7639.88	9690.29	8641.39	6699.47	8611.29
0.26	14630.7	11322	9302.85	19366.5	16903.6	15616.2	13400.3	10772.1	20780	9600.75	11219	8675.34	8911.47	8386.4	5013.26	9785.89	9471.11	12394.6	20232.2	13835	18446.7	16483.7	13096	9345.59	11418.8	9889.63	9126.55	9861.19	11090.3	9084.59	16917.3	19822.5	19965.2	6789.89	20075.2	18647.7	10005.5	15704.5	16002.4	6704.81	23243.2	9762.5	8285.28	9979.31	8553.65	10690.5	10080.7	7862	9454.26
0.325	18120.7	13579.5	10204.3	25385.2	20407.1	17054	15764.9	12478.9	23253.5	11561.1	11737.8	10392.3	9975.9	9947.31	6016.31	12342	11889.2	14065.1	23162.1	16998.2	19905.8	17853.5	14917	10681.4	12499.9	11779.6	10347.2	11196.9	13098.8	10657.6	21014.2	23374.8	22827.5	7499.31	22398.8	21994.3	11345.2	17641.3	18517.6	7756.75	25319.2	10927.1	9348.43	11427.9	9711.68	11893.5	11469.9	9479.74	10652.4
0.39	23312	16405.1	11250.3	31916.6	24377.2	18818.6	18742.9	15208.2	25804.4	14493.8	13015.3	12741.5	11266.2	12090.2	7408.29	16636.6	14952.7	16859.6	25841.7	21779	22446.8	19826	17383	12226.2	14078.3	14080.4	11646.8	12735.6	15280.8	12639.9	25962	28316.9	26090.4	8897.49	25045.9	24731.6	13511.8	18933.6	21555.9	8380.64	27953.7	12633.1	11109.9	13208.1	12262.6	13559.6	13508	11837.6	12719.3
0.455	29745.7	19047.6	12786.9	39416	29241.8	21154	22274.7	19584.5	30742.9	17759.4	14683.3	17062.4	13810.8	16339.2	9739.14	23232.7	19806.9	20717.1	29574.6	27874.5	25092.7	22607.2	21125	14478.6	15970.3	17188.9	13452	14509	17692.6	15409.5	31781.7	34577.8	30392.1	10983.5	28281.6	28718.6	16087.4	20388.1	25595.9	9418.67	30457.3	14680	13228.2	16056.2	15442.3	16146.2	16103.4	15707	16414.1
0.52	36886.8	21367.5	14819.7	45766.4	35166.1	24886.4	26995.6	25947.2	36562.5	21758.7	17440.7	23361.7	17463.5	22156.9	12913	31673.3	25698.8	26074.5	33416	35665	28634.9	26064.6	25551	17467.5	18543.1	20978.9	15506	16591.5	20733.8	18901.5	38629.4	42936.3	35413.4	14159.2	32343.7	33862.6	19737.9	23527.2	30317.9	10946.9	33525.6	17549.2	16544.2	19588.9	19859.1	18917.2	20810.1	20930.2	22847.3
0.585	43074.3	24183	18019	51718.2	43077.2	30148.7	32619.1	34166.6	43562.7	27053.3	21653	31451.7	22836.3	30447.4	17465	41138.7	31938.3	31786.6	37475.1	43294	32908.8	29431.8	32043	21481.9	21656.6	25715.2	18498.9	18985.2	24957	22773.7	45479.4	50471.9	40924.2	18375.5	36242.9	40276.6	24656	28112.1	36289	12744.6	36649.5	21487.1	22056.5	25373.1	24938.4	22765.9	27259.3	26851.8	31468.2
0.65	47973	27094.1	21320	56240	53227.6	35431.4	38156.7	43124.3	51124	33319.9	28124	40968.2	29472	39380.6	23534	49659.5	37569.4	36884	42700.7	49758.4	39168	33862.1	42880	26847.9	26168.8	30937.7	22456.2	21846.5	29915.7	28289	52902.3	57610.8	46909.5	23662.4	40228.3	47864.3	31078.8	34557.3	41781.3	15478.9	40515.1	25974.7	30633.5	31129.8	30207.1	27834.3	36205.3	32951.7	40402.3
0.715	51882.8	31405.2	25054.1	60796.8	61959.5	41763.7	43594.4	51453.1	57962	39748.8	36755.6	48851.4	35963.4	47070.8	30951.6	55444.9	41622.7	40975.5	48549.7	54096.4	46528.5	38783.7	55030	33289.6	31591.2	35652.9	27073.4	25198.9	35442.5	33935.2	59786.6	62917.3	51908	29338.6	44491.7	54952.9	37741.3	42889.9	46631.7	19808.4	44151.1	32643.5	40769.9	37191.2	35057.6	34009.2	46621.9	39148	48549.2
0.78	55636.8	36192.5	28919.2	64112.1	65535	46599.8	47994.2	57827	63219.1	46156.7	46170.1	53766.2	41249.2	51030.3	37984.6	60123	45330.5	41989.4	55094.3	56812	55735.2	44735.6	65535	39991.1	38257	40136.4	33369.8	28646.2	40391.9	41021.2	63434.7	65523.7	55627.5	33927.4	48062.1	61063.6	43787.1	51687.7	50056.8	25007	48332.5	39676.5	51804.7	42535.9	38490.6	41771.1	57350.1	42943.4	54356.5
0.845	58938.3	38978.1	32560.9	65459.7	65535	49861.6	51495	61223.7	65492	52903.6	54715.7	56157.9	43786.3	53222.5	44062.4	61873.6	47472.9	43394.8	61131.5	59248.5	63275.2	50719.1	65535	46681.2	45381.4	44685.1	38815.3	32070.4	44023	47457.5	65191.4	65535	57632.9	36814.3	51905.3	64507.1	48862.9	60177.7	51206.8	31381.9	52002.1	46100.1	60856.5	46106.1	40693.1	50601.1	63246.8	45792	57287.6
0.91	61338.4	42033.2	34943.5	65534.2	65535	52563.9	52425.5	63523.1	65535	58674.8	61866.3	57528.1	43946.9	52500.7	47202.7	63819	48890.9	44236.7	65200.5	59502.2	65373.2	57047.6	65535	52416.1	52158.1	48469.5	44742.5	35084.7	46461.6	53484.1	65409.8	65534.8	58950.4	36811	53753.7	65260.7	52548.4	65535	51007.5	37699.3	55709.1	51371	65509.8	48937.5	40963.4	58376.6	65296.4	47121.6	58697.9
0.975	63854	43682.4	37156.1	65535	65535	51437.7	51231.7	63379.8	65499.5	63701.6	65298.8	58581	42530.5	52020.9	48413.1	65249.2	49969.7	45597.1	65535	58705	65535	61790.8	65535	57866.5	57892.7	50778.7	48917.6	37279.5	46598.1	59574.4	63920.3	65515.2	58106.8	35839.7	55928.1	65523.7	54654.6	65535	48968.2	43153.8	57248.1	54752.1	65535	49919.8	40317.8	63798.8	65535	46801.3	57916
1.04	64104.1	43929.4	38680	65535	65535	49259.4	48434.8	61841.8	63630.2	65095.4	65534	59756.1	39110.6	50599.6	48869.1	65535	48819.1	47691.2	65535	55692.7	65535	64429.5	65535	62883.2	61103.6	52576.9	52314.4	38657	45761.1	64359.6	60236.9	61506.2	55575.3	32557	57579.6	63957.7	55809	65535	46125.3	47871.8	57476.3	57456.5	65535	49572.4	37473.3	65406.5	65535	46173.6	54550.4
1.105	62112	42619.5	38557.4	65535	65535	45845	44013.3	57994.1	60018.1	65535	65535	62398.8	33846.6	47408.2	47907.8	65535	45595.7	49132.3	65535	50586.7	65535	65496.2	65535	65535	63925.1	52608.9	54442	39145.2	43802.9	65528.5	55335.7	54460.5	52654.1	28693.9	57593.9	61900.2	56612.2	65535	42162.3	50834	56993	60323.8	65535	47837	35397.8	65535	65535	43698.9	48504.7
1.17	58360.7	40258	37306.7	63851.2	60972.6	40443.2	39602	53191.9	55830.6	65535	65535	63295.6	28412.2	42083.8	45076.1	64080.5	41717.6	49279.5	65535	43681	65535	65062.7	65535	65535	65067.3	51330.2	55203	39071.1	39716.5	65535	49463.9	46380.2	48292.2	25167.3	56828.7	57975.7	56516.8	65535	37677	53225	54822.7	62388.5	65535	44537.2	32614.5	63885.8	65535	38920.8	41640.7
1.235	52923	36051.2	34771.4	60576.3	52959.8	35545.5	35451.4	46448.9	50651.4	65535	65535	61936.4	24327.7	34834.3	40632.9	59006.2	37800	47630.6	65535	36938.4	65535	63205.7	65535	65535	63619.2	48998.1	54621	38216.9	36291.4	65535	43592.2	39125.3	43868.8	22242.5	54574.6	52877.3	54757.5	65535	32933.9	55699.3	50782.1	63203.8	65535	40904.7	30540.4	60403.9	65535	34689.6	35290.7
1.3	47710.7	30881.6	32019.9	55922.5	44463.5	31654.8	32096.8	40581.7	45598.2	61432.4	63978.5	58186.8	20825.7	27231.6	34516	52620.5	34477.4	44049.7	64339.7	31337.8	65535	59433.8	63588	65535	60485.3	46526.2	52962.8	36765.1	31868.1	65535	38918.8	33024.2	40076.6	20370.7	51594.9	47244.5	50627.8	65535	28160.6	58214.2	47225.8	63301.5	63423.7	37187.9	29134.1	56351.3	65481.3	30188.1	30420.5
1.365	42923.6	25311.9	28794.8	50328.9	36797.3	29037.4	29978.4	36434.9	41099.2	54246.3	59239.2	51116.9	19205.6	21265.1	27590.3	44457.7	31113.8	39435.1	59845.4	27748.4	65535	54550.2	55140	65535	56099.7	43108.4	49503.5	35301.6	28673.8	65535	34955.7	27848.4	36186.3	19209.1	47674.6	42350.1	45510.5	65448.5	24167.5	60681.3	43639.6	60253.5	54244.1	33310.5	28392.3	51594	63032.5	25605.6	27071.5
1.43	39248.1	20222.8	25769.7	44868	31893	27118.8	28385.6	33491.2	37529.4	46172.7	53124.3	43500.5	18194.9	18023	21882.2	37304.6	28708.2	35084.6	54202.2	25029.4	65535	47403.3	46731	65535	51347.6	39541.9	44400.3	33884	25892.9	65455.6	31681.1	23500.2	32393.8	17753.2	43152.7	38674.4	40073.9	64254.3	21147.5	63190.7	40998.9	55840.3	43570.4	30360.6	27733.3	47349.1	55854.9	22252.2	24708
1.495	36003.3	16048.3	22998.6	39265.7	29515.3	25716.4	27837	31456.5	34623.6	39141.3	48143.8	36760	17644.7	15732.6	17508.1	32259.8	26913.6	30949.3	49610.9	22792.2	62850.7	39363.5	39908	65535	46780.2	36684.5	40342.3	32108.4	23955.4	60783.8	28746.2	20699.5	30022.4	16812.4	38869.2	36137.4	36105.1	56912.6	18975.8	64080.3	38770.4	50710.9	34200	27950	26662.6	43249.2	47897.9	19406.3	22566
1.56	33252.8	13169.2	21096	34987.6	28417.6	24445.8	26887.8	30170.3	32682.5	33753.7	44127.8	31111.5	17018.6	14227.6	14272.7	28388.9	25589.3	27737	44842.9	21034.3	58233	32906.9	34322	63612.6	43725.6	33652.4	35831	30800.7	22185.8	54105.1	26202.1	18360.6	27901.6	15848.1	35020.7	33834.3	32973.9	46482.1	16875.8	63599.4	37138.2	45501.2	25938.6	25448.4	25852	39960.5	40896.3	17135	21248.3
1.625	30646.6	11652.6	19467.7	31229.1	27571.2	23874.9	25759.6	29013.6	30748.7	29716.9	40978	27000.9	16237.8	12542.4	12085.7	25284.9	24083.5	25164.8	40762.5	19759.9	52920.6	27552.3	30080	58652.9	41748.5	30702.7	32323.3	29166.6	20886.9	47436.1	24173.9	16608.5	25781.8	14577.1	32034.3	32006.5	30662.3	36777.3	15787.9	61057	35599.4	40538.8	20181.9	22501.3	24746.9	36934.1	35507.5	15611.2	19709.5
1.69	28761.2	10759.5	18149.7	28160.1	26408.2	23523.3	25145.4	28129.5	29404	26730.3	38107.7	23027.7	15859.3	11484.3	10419.2	23164.9	22286.9	23276.5	37397.9	18852.8	48292.6	23943.2	27142	54164.9	40327.9	28395.7	30119.7	27514	19810.1	41353.7	22461.6	15295.4	24226.7	13651.4	30015.3	29558.9	28428.2	29547.8	14452.6	56573	34093.3	35788.8	16583.1	19635.5	23585.9	33860.6	31307.2	14036.4	17574.1
1.755	26856.1	10198.1	17375.1	26018.3	24785.1	23352.9	24452.3	27359.4	28388	24271.4	34700.9	20870.7	15446	11022.9	8850.41	21906.9	20966.2	21110.8	33905.1	17890.2	44252.3	20976	24130	49377.4	39088.8	26717.4	27702	25914.7	0	36243.2	20495.8	14209.8	23192.7	12961.9	28242.7	28114	27445.2	24462.7	13202.6	50635.5	32665.4	31476.8	14908.3	17434.7	22419	31068.3	28052.4	13026	16020.6
1.82	24928.6	9701.29	16806.7	24870.6	23331.8	22689.7	23831.4	27222.2	27638.7	22089.7	31988.4	18897.8	14757	10430.7	8143.95	20772.8	19725.9	19722.5	31601.6	16937.4	40905.5	18651	21953	44837.4	37999	24819.8	25677	24202.6	0	30771.2	19027.5	0	21721.2	12290.6	26735.4	26713.8	26035.8	20654	12476.2	44501.5	31407.2	27515.8	13945.1	14956	21425.3	28663.4	26115.2	12268.4	14645.1
1.885	0	9371.85	15971.8	23150.6	21375.4	0	23128.6	0	26695.1	20488.4	29237.5	17871.9	14005.9	9926.7	7327.56	19371.7	18200.1	18461.7	29563.8	15818	38128	16905.6	20648	40183.2	36785.9	23167.8	24258.8	22766.8	0	27367.3	17616.7	0	20320.5	11594	25776.6	25534	24653.6	18843.1	12035	38853.5	30890.2	24065.7	13853.3	13305.2	20350.2	25944.8	24646.9	11361.6	13592.5
1.95	0	8929	0	22342.7	19107.6	0	22428.8	0	0	19236	26823.2	16257	13692.3	0	6886.91	18213.9	17064.4	17326.9	27468.1	0	35679	15610.8	18436	36019	36024.9	21826.6	22954.9	21055.5	0	24064.9	16569.5	0	19260.6	0	24875.1	24561.8	23287.1	17559.8	0	34114.8	29790.5	21410.3	13347.3	12189.9	19155.5	23385.6	23702.1	10953.8	12562.2
2.015	0	8763.8	0	21240.5	0	0	22093.8	0	0	18240.3	24735.7	0	13195.9	0	6418.48	17458.4	15909.2	16352.6	25536.4	0	33796.2	14538.8	16876	33057.5	35300.9	20596.2	21878.3	19521.7	0	21302	15280	0	18764.5	0	23703.8	23138.8	22183.5	16793.2	0	29637.7	28560.4	19279.9	13174.4	11264.7	18239.9	0	22764.2	10439.7	0
2.08	0	8700.37	0	20938.8	0	0	21884.6	0	0	17162.1	22691.4	0	13124.5	0	5864.76	16439.2	14711.4	15705.8	23958.7	0	32020.1	13542.8	15389	30483.6	34105.4	19203.1	20888.6	18334.9	0	19676.3	14183.2	0	17412.7	0	22791	21854.9	21197.6	15781.5	0	26322.7	27850	17649.4	13468.5	0	17133.5	0	21580.2	10101.2	0
2.145	0	8617.25	0	0	0	0	21082.2	0	0	15846.5	21210.1	0	0	0	5638.58	15583.8	13658.3	15227.5	22119.9	0	30622	12835.6	14196	28412.2	33134.7	18212	19865.3	16948	0	18463.2	13287.1	0	0	0	0	21032.2	20328.1	15230.6	0	23891.4	27101.3	16346	13649.7	0	16116.6	0	20777.6	9718.34	0
2.21	0	8658.65	0	0	0	0	20478.7	0	0	15124.9	19800.8	0	0	0	5433.98	15149	12580.3	14794.2	20146.6	0	29430.4	12291.4	12739	26640.3	32238	17129	19029	15478.7	0	16625.7	0	0	0	0	0	19711	19652.8	14488	0	21649.4	26108.3	15451.2	13536.2	0	14914.3	0	19693.1	9272.19	0
2.275	0	0	0	0	0	0	0	0	0	14152.5	18041.6	0	0	0	0	14219.4	11826.4	14343	18874.4	0	27981.2	0	11692	25236.8	30745	0	18274.2	14102.5	0	15411.3	0	0	0	0	0	19129.1	19082	0	0	19999.1	25309.6	14971.6	13346.9	0	14131	0	19376	0	0
2.34	0	0	0	0	0	0	0	0	0	13095.9	17367.4	0	0	0	0	0	11035.4	13749.7	0	0	26853.1	0	10242	24134.7	0	0	0	12960.5	0	14612.2	0	0	0	0	0	18290.2	0	0	0	18360.5	0	14411.1	13418	0	13301.3	0	18261.1	0	0
2.405	0	0	0	0	0	0	0	0	0	12322.5	16427.5	0	0	0	0	0	10323.7	13757.1	0	0	25739.1	0	9293	22958.4	0	0	0	11872.5	0	13359.5	0	0	0	0	0	0	0	0	0	17082.4	0	0	0	0	12431	0	17595.3	0	0
2.47	0	0	0	0	0	0	0	0	0	0	15431.5	0	0	0	0	0	9830.62	13775.8	0	0	24575.5	0	8423	21719.9	0	0	0	10776.5	0	12838.6	0	0	0	0	0	0	0	0	0	16044.6	0	0	0	0	12400.6	0	0	0	0
2.535	0	0	0	0	0	0	0	0	0	0	14650.3	0	0	0	0	0	9259.32	13546.3	0	0	23543	0	7734	20749.6	0	0	0	0	0	0	0	0	0	0	0	0	0	0	0	15082.6	0	0	0	0	0	0	0	0	0
2.6	0	0	0	0	0	0	0	0	0	0	13761.1	0	0	0	0	0	0	0	0	0	22190.6	0	7157	0	0	0	0	0	0	0	0	0	0	0	0	0	0	0	0	14546.3	0	0	0	0	0	0	0	0	0
2.665	0	0	0	0	0	0	0	0	0	0	13076.3	0	0	0	0	0	0	0	0	0	0	0	0	0	0	0	0	0	0	0	0	0	0	0	0	0	0	0	0	13474.1	0	0	0	0	0	0	0	0	0
2.73	0	0	0	0	0	0	0	0	0	0	12818	0	0	0	0	0	0	0	0	0	0	0	0	0	0	0	0	0	0	0	0	0	0	0	0	0	0	0	0	12530.2	0	0	0	0	0	0	0	0	0
2.795	0	0	0	0	0	0	0	0	0	0	0	0	0	0	0	0	0	0	0	0	0	0	0	0	0	0	0	0	0	0	0	0	0	0	0	0	0	0	0	12018.8	0	0	0	0	0	0	0	0	0
2.86	0	0	0	0	0	0	0	0	0	0	0	0	0	0	0	0	0	0	0	0	0	0	0	0	0	0	0	0	0	0	0	0	0	0	0	0	0	0	0	11430	0	0	0	0	0	0	0	0	0
2.925	0	0	0	0	0	0	0	0	0	0	0	0	0	0	0	0	0	0	0	0	0	0	0	0	0	0	0	0	0	0	0	0	0	0	0	0	0	0	0	10942	0	0	0	0	0	0	0	0	0
2.99	0	0	0	0	0	0	0	0	0	0	0	0	0	0	0	0	0	0	0	0	0	0	0	0	0	0	0	0	0	0	0	0	0	0	0	0	0	0	0	10614.4	0	0	0	0	0	0	0	0	0
0	0.661371	0.720455	0.667354	0.600122	0.577335	0.704416	0.643967	0.622632	0.579487	0.500152	0.705528	0.717533	0.689426	0.730809	0.617585	0.585046	0.5243	0.652692	0.659253	0.754673	0.727982	0.610839	0.429858	0.573894	0.695772	0.706849	0.7666	0.622854	0.632163	0.564929	0.656374	0.597725	0.681156	0.814034	0.660271	0.711455	0.579321	0.767664	0.654229	0.545377	0.791357	0.63198	0.505399	0.646962	0.699514	0.642028	0.555425	0.596351	0.580613
0.065	0.612296	0.677441	0.767304	0.619853	0.612228	0.695888	0.720127	0.70353	0.699924	0.558456	0.698855	0.681962	0.7185	0.731087	0.599405	0.594448	0.594551	0.664869	0.537338	0.759042	0.684663	0.577032	0.501931	0.557474	0.667602	0.681259	0.74168	0.666538	0.77766	0.625687	0.617743	0.575037	0.709297	0.788565	0.687583	0.661405	0.659106	0.653803	0.690613	0.536798	0.625705	0.6392	0.583349	0.625232	0.682463	0.593594	0.598174	0.611469	0.643033
0.13	0.63353	0.671382	0.776137	0.705496	0.63895	0.689089	0.720804	0.675679	0.698823	0.570368	0.682902	0.663228	0.726056	0.734851	0.600979	0.655962	0.570828	0.685465	0.737033	0.787911	0.655157	0.586607	0.46332	0.620504	0.589373	0.700787	0.788829	0.655346	0.780459	0.586467	0.648556	0.607137	0.770003	0.775525	0.638009	0.721285	0.656105	0.681815	0.705793	0.592674	0.748542	0.664761	0.57443	0.653459	0.669772	0.66689	0.576161	0.577037	0.573282
0.195	0.646058	0.798469	0.748449	0.687952	0.620223	0.702107	0.743502	0.635613	0.67347	0.564101	0.613018	0.606717	0.762516	0.71172	0.638847	0.645378	0.579618	0.693247	0.702474	0.819852	0.705833	0.579225	0.465894	0.621937	0.649609	0.723703	0.778594	0.652519	0.671573	0.525684	0.659606	0.611066	0.753615	0.778484	0.698885	0.723581	0.685361	0.799666	0.761481	0.577819	0.780333	0.652376	0.62063	0.725536	0.70463	0.718518	0.641086	0.649108	0.616534
0.26	0.705967	0.788379	0.711128	0.697311	0.650999	0.76395	0.742625	0.720009	0.715605	0.651684	0.64493	0.712636	0.760002	0.875032	0.641996	0.597279	0.61243	0.737307	0.697396	0.815148	0.702382	0.67678	0.499356	0.609624	0.703241	0.753646	0.798766	0.702195	0.686243	0.596051	0.696402	0.667346	0.72048	0.794861	0.757084	0.752614	0.719181	0.832929	0.842449	0.58756	0.753089	0.592886	0.565237	0.711197	0.759395	0.709958	0.664299	0.666294	0.634884
0.325	0.706739	0.763666	0.71132	0.720177	0.618337	0.737451	0.695265	0.75351	0.792658	0.630281	0.654327	0.71929	0.839716	0.789256	0.611044	0.634459	0.591957	0.714727	0.648341	0.838498	0.747051	0.690141	0.541828	0.587382	0.70101	0.690221	0.700555	0.698432	0.688169	0.617583	0.729812	0.711863	0.808433	0.790305	0.751366	0.70826	0.681531	0.782615	0.76899	0.548246	0.773012	0.642685	0.52873	0.684245	0.69037	0.719901	0.694767	0.648976	0.641555
0.39	0.716846	0.907461	0.717005	0.807093	0.675383	0.79371	0.779701	0.717952	0.733046	0.601521	0.698029	0.748976	0.795223	0.822074	0.641081	0.65724	0.583034	0.765657	0.763455	0.868734	0.658633	0.641159	0.568855	0.626831	0.742559	0.699296	0.74026	0.693223	0.744639	0.654566	0.716766	0.759969	0.8289	0.78042	0.75134	0.720901	0.684088	0.78893	0.782751	0.586159	0.812148	0.682945	0.645795	0.689026	0.72031	0.674284	0.703577	0.617438	0.612411
0.455	0.757543	0.901978	0.782771	0.825735	0.720469	0.763262	0.831165	0.710926	0.841416	0.587443	0.720643	0.769637	0.830576	0.842678	0.650555	0.651191	0.657434	0.734836	0.685385	0.844297	0.687784	0.715467	0.559846	0.650132	0.773291	0.757168	0.81966	0.664899	0.700645	0.658629	0.723179	0.803694	0.774121	0.831711	0.805664	0.774817	0.691538	0.827524	0.735374	0.690477	0.802373	0.709268	0.685365	0.732132	0.796561	0.652687	0.690392	0.664342	0.626315
0.52	0.774641	0.872741	0.830538	0.876404	0.748685	0.853399	0.839194	0.820533	0.816053	0.643049	0.596006	0.838523	0.818802	0.834088	0.606072	0.731941	0.713005	0.84428	0.774339	0.870456	0.678204	0.762653	0.60103	0.635557	0.815288	0.737297	0.833283	0.730581	0.781966	0.634953	0.762379	0.803263	0.841813	0.783103	0.790382	0.764667	0.707555	0.867118	0.742724	0.638903	0.848723	0.75417	0.615581	0.731905	0.870068	0.749388	0.688663	0.730806	0.737142
0.585	0.8302	0.84795	0.83119	0.881333	0.758554	0.872481	0.82949	0.824366	0.811537	0.680784	0.655511	0.880906	0.812061	0.833696	0.723129	0.776753	0.742405	0.890355	0.839956	0.916545	0.723416	0.791221	0.545689	0.620867	0.75242	0.756243	0.853169	0.756745	0.852626	0.684575	0.689268	0.891596	0.883378	0.879955	0.819257	0.802978	0.769011	0.852679	0.765709	0.641346	0.83703	0.816655	0.645414	0.767571	0.84738	0.698712	0.71397	0.757714	0.716544
0.65	0.8792	0.933071	0.884233	0.966955	0.775897	0.997194	0.905807	0.813549	0.846413	0.680038	0.729352	0.887928	0.871654	0.781292	0.733004	0.784653	0.761986	0.840946	0.923164	0.935442	0.813299	0.782546	0.642214	0.631641	0.844392	0.79389	0.901999	0.761233	0.855099	0.763519	0.895426	0.875165	0.930337	0.964248	0.889329	0.809513	0.763581	0.944326	0.770003	0.64006	0.835121	0.808455	0.781149	0.82321	0.791322	0.776583	0.754013	0.78299	0.867106
0.715	0.845483	0.893863	0.917239	0.860519	0.897471	0.99086	0.915184	0.845406	0.935435	0.805903	0.834784	0.935921	0.881263	0.904132	0.747856	0.916923	0.838884	0.902749	0.946175	0.924694	0.778528	0.862399	0.711712	0.681112	0.826391	0.90491	0.981432	0.853891	0.852222	0.69653	0.994585	0.915721	0.85004	0.912647	0.872013	0.932138	0.786153	0.96774	0.860113	0.648369	0.834142	0.871894	0.828952	0.892441	0.911259	0.804527	0.815756	0.826897	0.91811
0.78	0.843061	0.901915	0.893223	0.932886	1	0.955099	1	0.838669	0.915889	0.805606	0.818572	0.950048	0.962194	0.934997	0.84949	0.900265	0.883538	0.874392	1	0.944462	0.760366	0.878154	0.862291	0.706257	0.819289	0.932959	0.880102	0.918214	0.967896	0.812984	0.986552	0.938187	1	0.920704	0.876915	0.937645	0.783584	0.980468	0.869337	0.630916	0.929248	0.898626	0.947628	0.839431	0.917416	0.888971	0.884239	0.875859	0.942451
0.845	0.86244	1	0.875844	0.911226	0.97463	0.931924	0.984711	0.951602	0.870888	0.821943	0.960377	0.900245	1	0.95132	0.896954	0.911622	1	0.920868	0.97409	1	0.854802	0.911318	0.88417	0.72302	0.903404	0.945449	0.959663	0.90819	1	0.812563	0.980206	0.911499	0.937866	1	0.884797	0.961632	0.77635	0.984283	0.958466	0.671636	0.87656	0.874678	0.963159	0.987767	0.865693	0.856077	0.903988	0.919038	0.960422
0.91	0.89487	0.981993	0.912522	0.988517	0.911544	1	0.971012	1	1	0.940184	0.915496	0.902544	0.937444	0.949055	1	0.924226	0.874732	0.947614	0.974062	0.991148	0.92048	0.938735	0.854569	0.82938	0.967568	0.909726	1	0.862489	0.896465	0.840946	1	1	0.998902	0.997976	0.943064	0.938031	0.886793	0.968712	0.969563	0.683598	0.871081	0.887055	0.88334	0.962788	0.952375	0.881983	0.908459	0.978741	1
0.975	0.906056	0.925332	0.911041	0.852955	0.925067	0.962275	0.96079	0.999877	0.996031	0.92573	1	0.932521	0.913906	0.949119	0.94973	0.957263	0.913304	0.950149	0.92373	0.846571	0.912229	0.943847	0.89704	0.841114	0.95995	0.936443	0.988266	0.810987	0.901931	0.88911	0.996065	0.953691	0.972067	0.948763	0.886533	0.949594	0.890089	0.942562	0.957369	0.694876	0.899465	0.934959	1	0.896618	1	0.881712	0.919183	1	0.907197
1.04	1	0.92891	0.886769	0.889986	0.937148	0.918372	0.972844	0.952439	0.968907	0.961442	0.925296	0.926842	0.900282	0.957317	0.932826	0.984652	0.961439	0.950271	0.942265	0.854006	0.908917	0.92198	1	0.869186	0.911081	1	0.968737	0.947857	0.945757	0.890686	0.995739	0.896982	0.97839	0.998565	0.952725	1	0.863404	0.960624	0.931039	0.771529	0.91111	0.923566	0.984618	1	0.862732	0.916603	0.904474	0.99524	0.88938
1.105	0.98421	0.932204	0.983358	1	0.904743	0.986047	0.920784	0.99336	0.971634	0.927694	0.981628	0.89578	0.893422	0.998802	0.923728	1	0.970384	0.978235	0.914778	0.891979	1	0.973158	0.942085	0.865368	0.946911	0.950638	0.979497	0.892848	0.996281	0.907679	0.915715	0.818501	0.985852	0.907049	1	0.888356	0.896254	0.998885	1	0.801782	0.991769	1	0.970922	0.984396	0.868737	0.926181	0.894288	0.926175	0.853496
1.17	0.909442	0.890351	0.911695	0.895997	0.893249	0.878766	0.900923	0.854471	0.889548	0.884315	0.960531	0.943745	0.94581	0.955944	0.962091	0.919029	0.930086	0.96864	0.903893	0.967543	0.977974	1	0.853282	0.874262	1	0.885162	0.964897	0.936533	0.914135	1	0.916639	0.776005	0.938204	0.949759	0.979064	0.973325	0.970932	0.993421	0.936613	0.897237	1	0.981676	0.977545	0.920798	0.87908	1	0.869521	0.937392	0.831419
1.235	0.961358	0.856682	0.887445	0.922776	0.852934	0.905714	0.907177	0.880373	0.942428	1	0.953045	1	0.882884	1	0.990939	0.907445	0.967718	1	0.813074	0.919293	0.921914	0.931184	0.872587	0.961745	0.9534	0.890183	0.945713	0.947601	0.837279	0.973033	0.84396	0.753775	0.851044	0.925284	0.950691	0.983442	0.903331	1	0.905015	0.875614	0.948564	0.906027	0.931199	0.898853	0.84354	0.950801	0.926306	0.933616	0.738689
1.3	0.891498	0.82481	0.953198	0.972933	0.81505	0.965795	0.932266	0.873041	0.969807	0.990578	0.988392	0.968522	0.81593	0.935768	0.872954	0.878978	0.891047	0.916579	0.835648	0.912006	0.840642	0.866405	0.777349	0.876981	0.903524	0.88292	0.916541	1	0.856738	0.933023	0.868422	0.717265	0.879283	0.90221	0.956152	0.95811	0.938424	0.862891	0.868197	0.931991	0.882178	0.864527	0.874465	0.886608	0.834711	0.815615	1	0.894524	0.710255
1.365	0.914109	0.80737	1	0.886819	0.807106	0.967417	0.795254	0.807637	0.880693	0.89028	0.920381	0.882598	0.845089	0.95023	0.927821	0.765292	0.844262	0.922026	0.793392	0.873884	0.880002	0.854619	0.718147	0.991657	0.806653	0.896991	0.895871	0.919991	0.863628	0.88294	0.837459	0.697715	0.839749	0.8991	0.937734	0.953167	0.923673	0.878922	0.842766	1	0.911953	0.820855	0.778438	0.791964	0.778768	0.7423	0.958589	0.812419	0.753188
1.43	0.883647	0.827526	0.876264	0.831981	0.777891	0.890792	0.846934	0.761081	0.861769	0.811048	0.892528	0.892641	0.861142	0.918958	0.813873	0.759544	0.814875	0.932196	0.798829	0.942378	0.869389	0.769407	0.747748	1	0.807481	0.824622	0.901982	0.850683	0.82805	0.923856	0.804734	0.687199	0.881938	0.904151	0.849922	0.846984	1	0.835477	0.787918	0.907596	0.893008	0.857602	0.776084	0.861917	0.831616	0.810449	0.851599	0.781791	0.825613
1.495	0.867547	0.83076	0.832282	0.779794	0.815645	0.855636	0.840774	0.824297	0.868091	0.830495	0.96757	0.869338	0.848432	0.938382	0.750459	0.780992	0.800139	0.839677	0.759999	0.879781	0.767845	0.766301	0.782497	0.944378	0.828879	0.822048	0.918979	0.798122	0.845953	0.845964	0.768604	0.643518	0.887847	0.875939	0.856554	0.948652	0.832456	0.866182	0.780977	0.96967	0.9122	0.828144	0.730381	0.854148	0.869914	0.809871	0.847068	0.753674	0.698261
1.56	0.846211	0.770541	0.841494	0.745061	0.788855	0.768204	0.845724	0.833489	0.810525	0.807907	0.873278	0.838482	0.82794	0.850332	0.725376	0.785971	0.824997	0.818429	0.805916	0.867631	0.784165	0.714244	0.671815	0.923466	0.883454	0.822594	0.798701	0.779662	0.788963	0.815277	0.764976	0.677203	0.88543	0.893409	0.852262	0.862529	0.705705	0.76649	0.739925	0.955142	0.912243	0.822415	0.710244	0.782136	0.826154	0.790197	0.826415	0.700665	0.717791
1.625	0.81523	0.794117	0.858116	0.806508	0.781934	0.804668	0.806172	0.82114	0.761792	0.777992	0.92783	0.831062	0.827501	0.825667	0.67061	0.778052	0.790616	0.807231	0.740877	0.868113	0.820907	0.660617	0.701416	0.914206	0.84344	0.833251	0.850652	0.845109	0.793234	0.757446	0.731261	0.684199	0.847781	0.915574	0.832896	0.881305	0.820728	0.743235	0.76848	0.966626	0.880905	0.748128	0.717433	0.781966	0.823587	0.821947	0.810544	0.775384	0.76042
1.69	0.879812	0.779419	0.970269	0.813385	0.740581	0.792794	0.787184	0.783143	0.771572	0.753408	0.797684	0.793444	0.852234	0.891312	0.71406	0.745991	0.758683	0.773985	0.735332	0.846341	0.78612	0.602511	0.631918	0.86895	0.84055	0.774119	0.921948	0.837672	0.779996	0.794881	0.719347	0.655671	0.77884	0.833256	0.81945	0.896372	0.79139	0.743372	0.763362	0.932082	0.891223	0.684484	0.736285	0.744253	0.818991	0.786773	0.824168	0.796698	0.689027
1.755	0.833521	0.807651	0.909675	0.733953	0.727292	0.831075	0.778094	0.801665	0.805263	0.718609	0.804513	0.829472	0.817477	0.895777	0.672825	0.739093	0.716559	0.809306	0.7159	0.835696	0.782899	0.646469	0.635779	0.822444	0.808812	0.868464	0.81275	0.775221	0	0.789778	0.635592	0.648013	0.862508	0.845129	0.841756	0.890496	0.847047	0.882891	0.734213	0.926563	0.844363	0.748946	0.627271	0.789769	0.82494	0.7814	0.818865	0.721127	0.764157
1.82	0.736154	0.830892	0.930455	0.73822	0.738593	0.803807	0.783929	0.792795	0.808767	0.693306	0.820529	0.8209	0.805826	0.868461	0.71074	0.754573	0.69963	0.772644	0.7557	0.801596	0.78623	0.68962	0.622909	0.871016	0.761422	0.829754	0.838467	0.778375	0	0.680691	0.69052	0	0.830362	0.892302	0.845019	0.818899	0.837219	0.767533	0.72857	0.882877	0.861103	0.745843	0.623857	0.7784	0.827762	0.770018	0.731972	0.739447	0.61096
1.885	0	0.782182	0.857528	0.720063	0.669373	0	0.771272	0	0.839355	0.748619	0.824747	0.812437	0.842692	0.887114	0.669843	0.67584	0.748212	0.768381	0.75283	0.825625	0.752267	0.606928	0.633205	0.847118	0.725008	0.738084	0.892915	0.781996	0	0.661822	0.661492	0	0.810456	0.861257	0.77332	0.774037	0.789752	0.726579	0.749868	0.89815	0.860564	0.75842	0.645808	0.674941	0.773842	0.768907	0.7822	0.746822	0.6657
1.95	0	0.780272	0	0.739047	0.670589	0	0.843874	0	0	0.732734	0.803841	0.772673	0.850758	0	0.678421	0.674273	0.731911	0.729395	0.793966	0	0.768824	0.65277	0.593308	0.811292	0.829648	0.751313	0.817447	0.841392	0	0.742825	0.722191	0	0.764163	0	0.789775	0.797351	0.891182	0.767077	0	0.899851	0.835044	0.708063	0.716489	0.721899	0.761737	0.727684	0.797186	0.703287	0.630125
2.015	0	0.79235	0	0.683834	0	0	0.841418	0	0	0.697376	0.816633	0	0.78035	0	0.673097	0.66392	0.683687	0.731035	0.75122	0	0.770086	0.663237	0.544402	0.791415	0.77492	0.736907	0.81918	0.734025	0	0.69672	0.659519	0	0.807469	0	0.785641	0.806293	0.810436	0.664167	0	0.849865	0.862185	0.669185	0.689483	0.745093	0.729442	0	0.748442	0.703441	0
2.08	0	0.775985	0	0.71982	0	0	0.80654	0	0	0.663609	0.792666	0	0.725124	0	0.665983	0.628415	0.72859	0.717886	0.663052	0	0.714054	0.667564	0.620335	0.808146	0.778067	0.744542	0.84375	0.714829	0	0.647416	0.667586	0	0.80414	0	0.773475	0.8644	0.792036	0.686664	0	0.81346	0.906603	0.727267	0.642262	0	0.761143	0	0.796403	0.677794	0
2.145	0	0.780192	0	0	0	0	0.82784	0	0	0.588561	0.697282	0	0	0	0.698468	0.685228	0.713503	0.71776	0.660542	0	0.676088	0.684015	0.513514	0.756644	0.776111	0.794118	0.871693	0.792409	0	0.634996	0.703801	0	0	0	0	0.779582	0.792845	0.768634	0	0.765595	0.867476	0.733684	0.646846	0	0.731094	0	0.732341	0.691315	0
2.21	0	0.789807	0	0	0	0	0.769611	0	0	0.636596	0.718032	0	0	0	0.648384	0.668898	0.638659	0.762684	0.678985	0	0.722675	0.631188	0.56242	0.699296	0.747466	0.77101	0.824271	0.756361	0	0.713159	0	0	0	0	0	0.722684	0.758149	0.786808	0	0.779088	0.829895	0.665702	0.670263	0	0.732969	0	0.634829	0.707428	0
2.275	0	0	0	0	0	0	0	0	0	0.662912	0.781641	0	0	0	0	0.649035	0.650063	0.770729	0.650934	0	0.772272	0	0.550837	0.720107	0.7651	0	0.798621	0.733492	0	0.642954	0	0	0	0	0	0.801701	0.739961	0	0	0.756521	0.823057	0.631609	0.629528	0	0.760792	0	0.715957	0	0
2.34	0	0	0	0	0	0	0	0	0	0.645123	0.81763	0	0	0	0	0	0.656146	0.725262	0	0	0.743445	0	0.567568	0.727098	0	0	0	0.69839	0	0.628003	0	0	0	0	0	0.775094	0	0	0	0.748754	0	0.731442	0.756257	0	0.843438	0	0.687485	0	0
2.405	0	0	0	0	0	0	0	0	0	0.667737	0.693855	0	0	0	0	0	0.643704	0.730233	0	0	0.715991	0	0.6139	0.72854	0	0	0	0.707123	0	0.718229	0	0	0	0	0	0	0	0	0	0.769333	0	0	0	0	0.763124	0	0.719303	0	0
2.47	0	0	0	0	0	0	0	0	0	0	0.826908	0	0	0	0	0	0.629256	0.732527	0	0	0.750287	0	0.531532	0.741113	0	0	0	0.699435	0	0.653888	0	0	0	0	0	0	0	0	0	0.714539	0	0	0	0	0.632911	0	0	0	0
2.535	0	0	0	0	0	0	0	0	0	0	0.750074	0	0	0	0	0	0.648228	0.646849	0	0	0.776634	0	0.576577	0.714233	0	0	0	0	0	0	0	0	0	0	0	0	0	0	0	0.729292	0	0	0	0	0	0	0	0	0
2.6	0	0	0	0	0	0	0	0	0	0	0.728127	0	0	0	0	0	0	0	0	0	0.718182	0	0.501931	0	0	0	0	0	0	0	0	0	0	0	0	0	0	0	0	0.776331	0	0	0	0	0	0	0	0	0
2.665	0	0	0	0	0	0	0	0	0	0	0.7185	0	0	0	0	0	0	0	0	0	0	0	0	0	0	0	0	0	0	0	0	0	0	0	0	0	0	0	0	0.763646	0	0	0	0	0	0	0	0	0
2.73	0	0	0	0	0	0	0	0	0	0	0.733203	0	0	0	0	0	0	0	0	0	0	0	0	0	0	0	0	0	0	0	0	0	0	0	0	0	0	0	0	0.710065	0	0	0	0	0	0	0	0	0
2.795	0	0	0	0	0	0	0	0	0	0	0	0	0	0	0	0	0	0	0	0	0	0	0	0	0	0	0	0	0	0	0	0	0	0	0	0	0	0	0	0.745425	0	0	0	0	0	0	0	0	0
2.86	0	0	0	0	0	0	0	0	0	0	0	0	0	0	0	0	0	0	0	0	0	0	0	0	0	0	0	0	0	0	0	0	0	0	0	0	0	0	0	0.763595	0	0	0	0	0	0	0	0	0
2.925	0	0	0	0	0	0	0	0	0	0	0	0	0	0	0	0	0	0	0	0	0	0	0	0	0	0	0	0	0	0	0	0	0	0	0	0	0	0	0	0.698919	0	0	0	0	0	0	0	0	0
2.99	0	0	0	0	0	0	0	0	0	0	0	0	0	0	0	0	0	0	0	0	0	0	0	0	0	0	0	0	0	0	0	0	0	0	0	0	0	0	0	0.702591	0	0	0	0	0	0	0	0	0
0	0.110913	0.137584	0.192942	0.105653	0.14992	0.190454	0.15769	0.10985	0.182345	0.0847791	0.146563	0.0781096	0.134458	0.0890225	0.0582986	0.0843671	0.11629	0.163699	0.185702	0.139911	0.20061	0.235876	0.115602	0.0960861	0.121812	0.109962	0.100719	0.151513	0.125306	0.0793927	0.139689	0.144778	0.205325	0.136333	0.232577	0.180713	0.125644	0.179889	0.190639	0.0762169	0.321994	0.10093	0.0898451	0.114564	0.132191	0.110292	0.0944381	0.0983837	0.114485
0.065	0.130668	0.153678	0.200987	0.129825	0.169386	0.211678	0.172819	0.118549	0.21246	0.0945387	0.15062	0.0836609	0.149365	0.094053	0.063689	0.0958336	0.126255	0.178246	0.213414	0.150621	0.220161	0.231087	0.129854	0.103673	0.13558	0.126736	0.113251	0.17024	0.142356	0.0920943	0.16036	0.179878	0.231372	0.143406	0.256436	0.194136	0.138343	0.190613	0.214503	0.08116	0.342206	0.116277	0.0932711	0.132507	0.142029	0.118893	0.105071	0.107677	0.122644
0.13	0.155671	0.174018	0.21074	0.162362	0.187702	0.236688	0.199425	0.133054	0.245751	0.110462	0.161516	0.0962445	0.164368	0.109802	0.0732872	0.105041	0.143597	0.201543	0.236458	0.17002	0.235568	0.229026	0.15021	0.115024	0.148496	0.141818	0.128352	0.191741	0.164134	0.103879	0.184098	0.217486	0.265904	0.151787	0.281525	0.210657	0.149145	0.200043	0.242566	0.089384	0.361137	0.127168	0.102306	0.153089	0.154838	0.133006	0.11519	0.122395	0.130153
0.195	0.185443	0.204422	0.222217	0.218461	0.21489	0.262041	0.226598	0.149673	0.277836	0.126008	0.165933	0.113933	0.183833	0.134269	0.0862149	0.123559	0.164131	0.223715	0.270215	0.196841	0.254821	0.233762	0.17145	0.128116	0.162553	0.161228	0.145555	0.217451	0.200671	0.117857	0.219999	0.255515	0.304832	0.158102	0.310223	0.243311	0.160568	0.221611	0.271234	0.0964898	0.375006	0.144709	0.108175	0.176518	0.186505	0.147864	0.131859	0.142174	0.146705
0.26	0.228233	0.257732	0.240508	0.295514	0.257932	0.29709	0.255606	0.169578	0.317082	0.146498	0.171191	0.137061	0.202778	0.157573	0.102586	0.149323	0.189537	0.251516	0.308724	0.232512	0.281479	0.251674	0.199832	0.142605	0.175491	0.187984	0.165327	0.251913	0.237999	0.138622	0.258635	0.302472	0.338677	0.184436	0.348564	0.284595	0.176738	0.239636	0.312505	0.104631	0.404397	0.154222	0.126425	0.199907	0.208812	0.163127	0.153821	0.166845	0.161067
0.325	0.282676	0.309122	0.263813	0.387353	0.311392	0.324444	0.300711	0.196446	0.354825	0.176411	0.179107	0.164186	0.226999	0.186901	0.123111	0.188326	0.237928	0.285415	0.353431	0.285674	0.303743	0.272588	0.227619	0.162988	0.192108	0.223908	0.187438	0.286036	0.281102	0.162625	0.321269	0.356676	0.387231	0.203707	0.388909	0.33567	0.200402	0.269189	0.361624	0.121047	0.440516	0.17262	0.142648	0.228925	0.237082	0.181483	0.17502	0.201176	0.181478
0.39	0.363658	0.373442	0.290855	0.487016	0.371973	0.358014	0.357514	0.239413	0.39375	0.221162	0.1986	0.201302	0.256359	0.227164	0.151595	0.253858	0.299236	0.342123	0.394319	0.36602	0.342517	0.302705	0.265248	0.186559	0.216366	0.267643	0.210981	0.325343	0.327928	0.192873	0.396913	0.432088	0.442581	0.241686	0.43487	0.377445	0.238674	0.288908	0.420958	0.130783	0.486353	0.19957	0.169527	0.264586	0.299355	0.206906	0.206118	0.251214	0.21669
0.455	0.464023	0.433595	0.330581	0.60145	0.446201	0.402444	0.424882	0.308305	0.469107	0.270992	0.224053	0.269567	0.31426	0.306999	0.19929	0.354509	0.396378	0.4204	0.451279	0.468461	0.382889	0.345168	0.322347	0.22093	0.245443	0.32673	0.243683	0.370646	0.379685	0.235134	0.485886	0.527623	0.515553	0.298349	0.491052	0.438293	0.284168	0.311103	0.499854	0.146982	0.529911	0.231905	0.201849	0.32164	0.376978	0.246376	0.245723	0.333329	0.279636
0.52	0.575421	0.486405	0.383137	0.698351	0.536601	0.473451	0.514933	0.408469	0.557908	0.332016	0.266128	0.369089	0.397377	0.416307	0.264236	0.483304	0.514287	0.529114	0.509895	0.59939	0.436941	0.397957	0.389883	0.266537	0.284983	0.39877	0.280891	0.423846	0.444949	0.288418	0.590575	0.655166	0.600731	0.384611	0.561581	0.516799	0.348652	0.359002	0.592068	0.170831	0.583295	0.277232	0.252448	0.392408	0.484801	0.288658	0.317542	0.444173	0.389236
0.585	0.671943	0.550496	0.465849	0.789169	0.657316	0.573564	0.622199	0.537861	0.664725	0.412806	0.330404	0.496901	0.519634	0.572079	0.357383	0.627736	0.639153	0.645027	0.571833	0.727605	0.502155	0.449367	0.488945	0.327793	0.332834	0.488799	0.335108	0.484994	0.53558	0.347505	0.695299	0.770152	0.694214	0.49914	0.629284	0.614687	0.435525	0.428963	0.708675	0.198885	0.637645	0.339441	0.336561	0.508278	0.608799	0.347385	0.41595	0.56984	0.536104
0.65	0.748362	0.616764	0.551189	0.858167	0.812201	0.674063	0.727826	0.678876	0.780103	0.508429	0.429145	0.647252	0.670628	0.739924	0.481572	0.757756	0.751843	0.748464	0.651571	0.836246	0.597665	0.517009	0.654307	0.409672	0.40218	0.588069	0.406794	0.55809	0.641994	0.431663	0.808783	0.879084	0.795744	0.64275	0.698482	0.730488	0.548978	0.527311	0.815933	0.241555	0.704902	0.410334	0.467438	0.623596	0.737417	0.424724	0.552457	0.69929	0.688309
0.715	0.809353	0.714902	0.647728	0.9277	0.945441	0.794533	0.831549	0.809991	0.884444	0.606528	0.560855	0.771797	0.818336	0.884415	0.633358	0.846035	0.832958	0.831493	0.740821	0.90915	0.70998	0.592152	0.839704	0.507966	0.485516	0.677696	0.490433	0.643729	0.760599	0.517817	0.914032	0.960057	0.880537	0.796936	0.772507	0.838673	0.666664	0.654458	0.910654	0.309118	0.768162	0.515682	0.622108	0.74502	0.855828	0.518948	0.711404	0.830787	0.827103
0.78	0.867913	0.823878	0.747652	0.978287	1	0.886536	0.915474	0.91033	0.964662	0.704307	0.704511	0.849446	0.938615	0.958812	0.777272	0.917418	0.907159	0.852067	0.840686	0.954789	0.850465	0.683026	1	0.610225	0.58796	0.76292	0.604493	0.731795	0.866815	0.625944	0.969804	0.999828	0.943632	0.921584	0.8345	0.931931	0.773457	0.788704	0.977542	0.390245	0.840912	0.626785	0.790488	0.852086	0.939636	0.637387	0.875106	0.91133	0.926038
0.845	0.919416	0.887289	0.841802	0.998852	1	0.948591	0.98225	0.963803	0.999344	0.807257	0.834907	0.887232	0.996345	1	0.901642	0.94413	0.950033	0.880585	0.932807	0.995737	0.965518	0.774383	1	0.71231	0.697453	0.849383	0.703138	0.819268	0.944739	0.724156	0.996661	1	0.97765	1	0.90123	0.984485	0.863116	0.918253	1	0.489728	0.904759	0.728262	0.92861	0.923605	0.993401	0.772124	0.965085	0.971783	0.975974
0.91	0.956856	0.956835	0.9034	0.999988	1	1	1	1	1	0.89532	0.944019	0.90888	1	0.986438	0.965901	0.973815	0.978411	0.897669	0.994896	1	0.997532	0.871006	1	0.799818	0.801602	0.921316	0.810509	0.896271	0.997071	0.816115	1	0.999997	1	0.999911	0.933322	0.995987	0.928218	1	0.996108	0.588314	0.969254	0.811529	0.999616	0.980323	1	0.89077	0.996359	1	1
0.975	0.9961	0.994377	0.960603	1	1	0.978576	0.977229	0.997744	0.999459	0.972024	0.996395	0.925514	0.967769	0.977423	0.990669	0.995639	1	0.925275	1	0.986603	1	0.943425	1	0.882986	0.889734	0.96521	0.886141	0.952339	1	0.909048	0.977228	0.999699	0.985688	0.973528	0.971077	1	0.965421	1	0.956283	0.673433	0.99603	0.86494	1	1	0.984242	0.973507	1	0.993202	0.98668
1.04	1	1	1	1	1	0.937135	0.923879	0.973533	0.970934	0.993292	0.999985	0.94408	0.889951	0.950719	1	1	0.976973	0.96777	1	0.935977	1	0.983713	1	0.959537	0.939082	0.99939	0.947674	0.987528	0.982037	0.982064	0.920916	0.938524	0.942747	0.884358	0.999751	0.976101	0.985813	1	0.900765	0.747059	1	0.907664	1	0.993041	0.9148	0.99804	1	0.979882	0.929342
1.105	0.968925	0.970181	0.99683	1	1	0.872176	0.839539	0.912961	0.915818	1	1	0.985831	0.770169	0.890755	0.980329	1	0.912466	0.997013	1	0.850165	1	1	1	1	0.982446	1	0.986214	1	0.940014	0.999901	0.845985	0.831014	0.893193	0.779423	1	0.9447	1	1	0.823372	0.793287	0.991591	0.952959	1	0.958278	0.864134	1	1	0.927363	0.826345
1.17	0.910406	0.916425	0.964497	0.974306	0.930383	0.76941	0.755396	0.837363	0.85192	1	1	1	0.646512	0.790714	0.922385	0.977805	0.834858	1	1	0.734108	1	0.993382	1	1	1	0.975693	1	0.998107	0.852321	1	0.756215	0.707717	0.819199	0.683629	0.986713	0.884806	0.998316	1	0.735782	0.830599	0.953832	0.985576	1	0.892175	0.796186	0.974835	1	0.825965	0.709408
1.235	0.825579	0.820661	0.898952	0.924334	0.808114	0.676235	0.676225	0.731214	0.77289	1	1	0.978526	0.55357	0.654504	0.831465	0.900377	0.756457	0.966539	1	0.620792	1	0.965028	1	1	0.977744	0.931364	0.989458	0.976286	0.778817	1	0.666447	0.597014	0.744163	0.604182	0.947575	0.806995	0.967239	1	0.643155	0.869211	0.883532	0.998456	1	0.819409	0.745554	0.921704	1	0.736171	0.601227
1.3	0.744269	0.702983	0.827817	0.853323	0.67847	0.602215	0.612236	0.63885	0.695785	0.937398	0.97625	0.919286	0.473883	0.511655	0.706296	0.802937	0.689966	0.893874	0.98176	0.526666	1	0.907438	0.970291	1	0.92958	0.884378	0.959419	0.9392	0.683892	1	0.595	0.503918	0.679836	0.553337	0.895839	0.721029	0.894292	1	0.549939	0.908457	0.821658	1	0.967784	0.744954	0.711224	0.859866	0.999181	0.640643	0.518255
1.365	0.669593	0.576196	0.744436	0.767969	0.56149	0.552421	0.571829	0.57357	0.627133	0.827745	0.903933	0.80759	0.437017	0.399551	0.564575	0.678381	0.622653	0.800234	0.913182	0.466343	1	0.832876	0.841382	1	0.862178	0.819412	0.896755	0.901813	0.615343	1	0.534411	0.424939	0.613842	0.521783	0.827772	0.646333	0.8039	0.99868	0.471959	0.946958	0.759262	0.951849	0.827712	0.667281	0.693115	0.787274	0.961815	0.543393	0.461201
1.43	0.612256	0.460347	0.666228	0.684642	0.486656	0.515921	0.541445	0.527229	0.572662	0.70455	0.810624	0.687259	0.41402	0.338635	0.447773	0.569231	0.574512	0.711951	0.827073	0.420647	1	0.723757	0.713069	1	0.789145	0.75162	0.804311	0.865599	0.555664	0.998788	0.484348	0.35859	0.549509	0.482237	0.749258	0.590235	0.707867	0.980457	0.412981	0.986118	0.713319	0.882132	0.664842	0.608188	0.677026	0.722501	0.852291	0.472228	0.420935
1.495	0.561639	0.36532	0.594586	0.599157	0.450375	0.48924	0.530982	0.495198	0.528323	0.597258	0.734627	0.580767	0.401501	0.295601	0.358266	0.492253	0.538598	0.628036	0.757014	0.383047	0.959041	0.601004	0.608957	1	0.71895	0.697306	0.7308	0.82024	0.514085	0.927501	0.439479	0.315854	0.509282	0.456683	0.674884	0.551517	0.637762	0.868431	0.370573	1	0.674546	0.801101	0.521858	0.559898	0.650889	0.65994	0.730874	0.411835	0.384444
1.56	0.518732	0.29978	0.545398	0.533876	0.433625	0.465069	0.512876	0.474951	0.498703	0.515048	0.673347	0.491527	0.387253	0.267324	0.29206	0.433188	0.512096	0.562851	0.684259	0.353504	0.888579	0.502424	0.52372	0.970666	0.672006	0.63967	0.649077	0.786833	0.476111	0.82559	0.400584	0.280164	0.473305	0.430489	0.608062	0.516367	0.582452	0.709272	0.329562	0.992495	0.646149	0.718801	0.395797	0.509786	0.6311	0.609759	0.624037	0.363634	0.361994
1.625	0.478076	0.265258	0.503303	0.476525	0.420709	0.454207	0.491355	0.456742	0.469195	0.453451	0.625284	0.426583	0.369486	0.23566	0.247308	0.385822	0.481963	0.510655	0.621996	0.332087	0.807517	0.42067	0.458991	0.894986	0.641619	0.583603	0.585536	0.745089	0.448234	0.723829	0.369577	0.253429	0.437347	0.395962	0.55621	0.488472	0.54162	0.561185	0.308316	0.95282	0.619376	0.640408	0.307956	0.450749	0.604122	0.563579	0.54181	0.331296	0.335778
1.69	0.448665	0.244927	0.469228	0.429696	0.402964	0.447519	0.47964	0.442823	0.448677	0.407879	0.581485	0.363811	0.360875	0.21578	0.213207	0.353474	0.446007	0.472337	0.570656	0.316842	0.736898	0.365567	0.41416	0.826504	0.619788	0.539751	0.545617	0.702871	0.425126	0.631017	0.343398	0.233393	0.410967	0.370819	0.521154	0.451118	0.502157	0.45087	0.282241	0.882846	0.593173	0.56537	0.253042	0.393342	0.57578	0.51668	0.477718	0.297875	0.2994
1.755	0.418945	0.232149	0.449202	0.397013	0.378197	0.444277	0.46642	0.4307	0.433173	0.370358	0.529502	0.329734	0.351469	0.20711	0.181105	0.334278	0.419578	0.428389	0.517359	0.300665	0.675247	0.320264	0.3682	0.753451	0.600743	0.507849	0.501821	0.662016	0	0.553036	0.313345	0.216827	0.393427	0.35209	0.490376	0.429065	0.484793	0.373277	0.25783	0.790189	0.568329	0.497252	0.227486	0.349254	0.547294	0.474071	0.428052	0.276433	0.272934
1.82	0.388878	0.220838	0.434506	0.379501	0.356021	0.43166	0.454577	0.428541	0.42174	0.337068	0.488112	0.298565	0.335792	0.195984	0.166648	0.316972	0.394757	0.400217	0.482209	0.284652	0.624179	0.284764	0.334981	0.684175	0.583995	0.471779	0.465139	0.618278	0	0.469539	0.290896	0	0.368466	0.333855	0.464206	0.407697	0.459897	0.31516	0.243644	0.694465	0.546438	0.434678	0.212788	0.299601	0.523035	0.437376	0.398493	0.260357	0.249499
1.885	0	0.213339	0.41292	0.353255	0.326168	0	0.44117	0	0.407341	0.312633	0.446135	0.282356	0.318701	0.186513	0.149943	0.295593	0.364222	0.374633	0.451115	0.265839	0.581796	0.258116	0.315068	0.613157	0.565351	0.440377	0.439447	0.581599	0	0.417598	0.269329	0	0.344705	0.314932	0.447558	0.389691	0.435483	0.287527	0.235028	0.606325	0.537442	0.380175	0.211387	0.266532	0.496791	0.395893	0.376088	0.241112	0.231568
1.95	0	0.203258	0	0.340928	0.291563	0	0.427822	0	0	0.293523	0.409296	0.256842	0.311564	0	0.140926	0.277927	0.341495	0.351605	0.419136	0	0.544426	0.238346	0.281315	0.549615	0.553656	0.414885	0.415827	0.537882	0	0.367207	0.253319	0	0.326725	0	0.431906	0.374854	0.411345	0.267945	0	0.532376	0.518309	0.338227	0.203667	0.24419	0.467626	0.356842	0.36167	0.232458	0.214015
2.015	0	0.199497	0	0.324109	0	0	0.421432	0	0	0.278329	0.377443	0	0.300269	0	0.13134	0.266397	0.318378	0.331833	0.389661	0	0.515696	0.221979	0.257511	0.504425	0.542529	0.391496	0.396324	0.498699	0	0.325047	0.233604	0	0.318309	0	0.411568	0.353136	0.39185	0.256248	0	0.462508	0.496908	0.304572	0.201029	0.225656	0.445273	0	0.347359	0.221548	0
2.08	0	0.198053	0	0.319506	0	0	0.417442	0	0	0.261876	0.346248	0	0.298645	0	0.12001	0.250847	0.294405	0.318709	0.365587	0	0.488596	0.206772	0.234821	0.46515	0.524156	0.365015	0.378396	0.468381	0	0.300241	0.216836	0	0.295379	0	0.395719	0.333542	0.374436	0.24081	0	0.410777	0.484547	0.278814	0.205516	0	0.418264	0	0.329293	0.214363	0
2.145	0	0.196161	0	0	0	0	0.402136	0	0	0.241802	0.323645	0	0	0	0.115381	0.237793	0.273332	0.309003	0.337529	0	0.467262	0.195975	0.216617	0.433542	0.509237	0.346177	0.35986	0.432953	0	0.28173	0.203136	0	0	0	0	0.320986	0.359076	0.232403	0	0.372836	0.471521	0.258224	0.208281	0	0.39344	0	0.317046	0.206239	0
2.21	0	0.197104	0	0	0	0	0.390624	0	0	0.230791	0.302142	0	0	0	0.111195	0.231158	0.251759	0.30021	0.307418	0	0.44908	0.187666	0.194385	0.406505	0.495456	0.32559	0.344709	0.395418	0	0.253691	0	0	0	0	0	0.300823	0.347149	0.221073	0	0.337848	0.454245	0.244089	0.206549	0	0.364088	0	0.300498	0.196772	0
2.275	0	0	0	0	0	0	0	0	0	0.215953	0.275297	0	0	0	0	0.216975	0.236672	0.291055	0.288006	0	0.426965	0	0.178408	0.385089	0.472511	0	0.331037	0.360261	0	0.235161	0	0	0	0	0	0.291942	0.337065	0	0	0.312095	0.440348	0.236513	0.203661	0	0.344968	0	0.295659	0	0
2.34	0	0	0	0	0	0	0	0	0	0.19983	0.26501	0	0	0	0	0	0.220841	0.279016	0	0	0.409751	0	0.156283	0.368272	0	0	0	0.331089	0	0.222967	0	0	0	0	0	0.279139	0	0	0	0.286524	0	0.227657	0.204746	0	0.324711	0	0.278647	0	0
2.405	0	0	0	0	0	0	0	0	0	0.188029	0.250668	0	0	0	0	0	0.206598	0.279165	0	0	0.392754	0	0.141802	0.350323	0	0	0	0.303294	0	0.203853	0	0	0	0	0	0	0	0	0	0.266579	0	0	0	0	0.303466	0	0.268488	0	0
2.47	0	0	0	0	0	0	0	0	0	0	0.23547	0	0	0	0	0	0.196732	0.279544	0	0	0.374998	0	0.128527	0.331425	0	0	0	0.275297	0	0.195905	0	0	0	0	0	0	0	0	0	0.250383	0	0	0	0	0.302724	0	0	0	0
2.535	0	0	0	0	0	0	0	0	0	0	0.223549	0	0	0	0	0	0.185299	0.274886	0	0	0.359244	0	0.118013	0.316618	0	0	0	0	0	0	0	0	0	0	0	0	0	0	0	0.23537	0	0	0	0	0	0	0	0	0
2.6	0	0	0	0	0	0	0	0	0	0	0.20998	0	0	0	0	0	0	0	0	0	0.338607	0	0.109209	0	0	0	0	0	0	0	0	0	0	0	0	0	0	0	0	0.227001	0	0	0	0	0	0	0	0	0
2.665	0	0	0	0	0	0	0	0	0	0	0.199531	0	0	0	0	0	0	0	0	0	0	0	0	0	0	0	0	0	0	0	0	0	0	0	0	0	0	0	0	0.210269	0	0	0	0	0	0	0	0	0
2.73	0	0	0	0	0	0	0	0	0	0	0.19559	0	0	0	0	0	0	0	0	0	0	0	0	0	0	0	0	0	0	0	0	0	0	0	0	0	0	0	0	0.195539	0	0	0	0	0	0	0	0	0
2.795	0	0	0	0	0	0	0	0	0	0	0	0	0	0	0	0	0	0	0	0	0	0	0	0	0	0	0	0	0	0	0	0	0	0	0	0	0	0	0	0.187559	0	0	0	0	0	0	0	0	0
2.86	0	0	0	0	0	0	0	0	0	0	0	0	0	0	0	0	0	0	0	0	0	0	0	0	0	0	0	0	0	0	0	0	0	0	0	0	0	0	0	0.17837	0	0	0	0	0	0	0	0	0
2.925	0	0	0	0	0	0	0	0	0	0	0	0	0	0	0	0	0	0	0	0	0	0	0	0	0	0	0	0	0	0	0	0	0	0	0	0	0	0	0	0.170754	0	0	0	0	0	0	0	0	0
2.99	0	0	0	0	0	0	0	0	0	0	0	0	0	0	0	0	0	0	0	0	0	0	0	0	0	0	0	0	0	0	0	0	0	0	0	0	0	0	0	0.165642	0	0	0	0	0	0	0	0	0
[truncated: 14 more columns]

## Sheet: Brl1_centered
																																								0.0762169
																																								0.08116
																																								0.089384
																								0.0960861																0.0964898		0.10093
																					0.20061			0.103673						0.0793927										0.104631		0.116277
										0.0847791	0.146563	0.0781096						0.163699			0.220161			0.115024	0.121812		0.100719			0.0920943										0.121047		0.127168
										0.0945387	0.15062	0.0836609						0.178246	0.185702		0.235568	0.235876		0.128116	0.13558	0.109962	0.113251	0.151513		0.103879					0.232577		0.125644			0.130783		0.144709	0.0898451			0.110292	0.0944381
0	0.110913	0.137584	0.192942	0.105653						0.110462	0.161516	0.0962445			0.0582986	0.0843671		0.201543	0.213414		0.254821	0.231087		0.142605	0.148496	0.126736	0.128352	0.17024		0.117857					0.256436		0.138343	0.179889		0.146982	0.321994	0.154222	0.0932711			0.118893	0.105071
0.065	0.130668	0.153678	0.200987	0.129825	0.14992					0.126008	0.165933	0.113933			0.063689	0.0958336	0.11629	0.223715	0.236458		0.281479	0.229026	0.115602	0.162988	0.162553	0.141818	0.145555	0.191741	0.125306	0.138622					0.281525	0.180713	0.149145	0.190613		0.170831	0.342206	0.17262	0.102306	0.114564		0.133006	0.11519
0.13	0.155671	0.174018	0.21074	0.162362	0.169386	0.190454	0.15769	0.10985	0.182345	0.146498	0.171191	0.137061	0.134458		0.0732872	0.105041	0.126255	0.251516	0.270215	0.139911	0.303743	0.233762	0.129854	0.186559	0.175491	0.161228	0.165327	0.217451	0.142356	0.162625	0.139689		0.205325		0.310223	0.194136	0.160568	0.200043		0.198885	0.361137	0.19957	0.108175	0.132507	0.132191	0.147864	0.131859	0.0983837	0.114485
0.195	0.185443	0.204422	0.222217	0.218461	0.187702	0.211678	0.172819	0.118549	0.21246	0.176411	0.179107	0.164186	0.149365	0.0890225	0.0862149	0.123559	0.143597	0.285415	0.308724	0.150621	0.342517	0.251674	0.15021	0.22093	0.192108	0.187984	0.187438	0.251913	0.164134	0.192873	0.16036	0.144778	0.231372	0.136333	0.348564	0.210657	0.176738	0.221611	0.190639	0.241555	0.375006	0.231905	0.126425	0.153089	0.142029	0.163127	0.153821	0.107677	0.122644
0.26	0.228233	0.257732	0.240508	0.295514	0.21489	0.236688	0.199425	0.133054	0.245751	0.221162	0.1986	0.201302	0.164368	0.094053	0.102586	0.149323	0.164131	0.342123	0.353431	0.17002	0.382889	0.272588	0.17145	0.266537	0.216366	0.223908	0.210981	0.286036	0.200671	0.235134	0.184098	0.179878	0.265904	0.143406	0.388909	0.243311	0.200402	0.239636	0.214503	0.309118	0.404397	0.277232	0.142648	0.176518	0.154838	0.181483	0.17502	0.122395	0.130153
0.325	0.282676	0.309122	0.263813	0.387353	0.257932	0.262041	0.226598	0.149673	0.277836	0.270992	0.224053	0.269567	0.183833	0.109802	0.123111	0.188326	0.189537	0.4204	0.394319	0.196841	0.436941	0.302705	0.199832	0.327793	0.245443	0.267643	0.243683	0.325343	0.237999	0.288418	0.219999	0.217486	0.304832	0.151787	0.43487	0.284595	0.238674	0.269189	0.242566	0.390245	0.440516	0.339441	0.169527	0.199907	0.186505	0.206906	0.206118	0.142174	0.146705
0.39	0.363658	0.373442	0.290855	0.487016	0.311392	0.29709	0.255606	0.169578	0.317082	0.332016	0.266128	0.369089	0.202778	0.134269	0.151595	0.253858	0.237928	0.529114	0.451279	0.232512	0.502155	0.345168	0.227619	0.409672	0.284983	0.32673	0.280891	0.370646	0.281102	0.347505	0.258635	0.255515	0.338677	0.158102	0.491052	0.33567	0.284168	0.288908	0.271234	0.489728	0.486353	0.410334	0.201849	0.228925	0.208812	0.246376	0.245723	0.166845	0.161067
0.455	0.464023	0.433595	0.330581	0.60145	0.371973	0.324444	0.300711	0.196446	0.354825	0.412806	0.330404	0.496901	0.226999	0.157573	0.19929	0.354509	0.299236	0.645027	0.509895	0.285674	0.597665	0.397957	0.265248	0.507966	0.332834	0.39877	0.335108	0.423846	0.327928	0.431663	0.321269	0.302472	0.387231	0.184436	0.561581	0.377445	0.348652	0.311103	0.312505	0.588314	0.529911	0.515682	0.252448	0.264586	0.237082	0.288658	0.317542	0.201176	0.181478
0.52	0.575421	0.486405	0.383137	0.698351	0.446201	0.358014	0.357514	0.239413	0.39375	0.508429	0.429145	0.647252	0.256359	0.186901	0.264236	0.483304	0.396378	0.748464	0.571833	0.36602	0.70998	0.449367	0.322347	0.610225	0.40218	0.488799	0.406794	0.484994	0.379685	0.517817	0.396913	0.356676	0.442581	0.203707	0.629284	0.438293	0.435525	0.359002	0.361624	0.673433	0.583295	0.626785	0.336561	0.32164	0.299355	0.347385	0.41595	0.251214	0.21669
0.585	0.671943	0.550496	0.465849	0.789169	0.536601	0.402444	0.424882	0.308305	0.469107	0.606528	0.560855	0.771797	0.31426	0.227164	0.357383	0.627736	0.514287	0.831493	0.651571	0.468461	0.850465	0.517009	0.389883	0.71231	0.485516	0.588069	0.490433	0.55809	0.444949	0.625944	0.485886	0.432088	0.515553	0.241686	0.698482	0.516799	0.548978	0.428963	0.420958	0.747059	0.637645	0.728262	0.467438	0.392408	0.376978	0.424724	0.552457	0.333329	0.279636
0.65	0.748362	0.616764	0.551189	0.858167	0.657316	0.473451	0.514933	0.408469	0.557908	0.704307	0.704511	0.849446	0.397377	0.306999	0.481572	0.757756	0.639153	0.852067	0.740821	0.59939	0.965518	0.592152	0.488945	0.799818	0.58796	0.677696	0.604493	0.643729	0.53558	0.724156	0.590575	0.527623	0.600731	0.298349	0.772507	0.614687	0.666664	0.527311	0.499854	0.793287	0.704902	0.811529	0.622108	0.508278	0.484801	0.518948	0.711404	0.444173	0.389236
0.715	0.809353	0.714902	0.647728	0.9277	0.812201	0.573564	0.622199	0.537861	0.664725	0.807257	0.834907	0.887232	0.519634	0.416307	0.633358	0.846035	0.751843	0.880585	0.840686	0.727605	0.997532	0.683026	0.654307	0.882986	0.697453	0.76292	0.703138	0.731795	0.641994	0.816115	0.695299	0.655166	0.694214	0.384611	0.8345	0.730488	0.773457	0.654458	0.592068	0.830599	0.768162	0.86494	0.790488	0.623596	0.608799	0.637387	0.875106	0.56984	0.536104
0.78	0.867913	0.823878	0.747652	0.978287	0.945441	0.674063	0.727826	0.678876	0.780103	0.89532	0.944019	0.90888	0.670628	0.572079	0.777272	0.917418	0.832958	0.897669	0.932807	0.836246	1	0.774383	0.839704	0.959537	0.801602	0.849383	0.810509	0.819268	0.760599	0.909048	0.808783	0.770152	0.795744	0.49914	0.90123	0.838673	0.863116	0.788704	0.708675	0.869211	0.840912	0.907664	0.92861	0.74502	0.737417	0.772124	0.965085	0.69929	0.688309
0.845	0.919416	0.887289	0.841802	0.998852	1	0.794533	0.831549	0.809991	0.884444	0.972024	0.996395	0.925514	0.818336	0.739924	0.901642	0.94413	0.907159	0.925275	0.994896	0.90915	1	0.871006	1	1	0.889734	0.921316	0.886141	0.896271	0.866815	0.982064	0.914032	0.879084	0.880537	0.64275	0.933322	0.931931	0.928218	0.918253	0.815933	0.908457	0.904759	0.952959	0.999616	0.852086	0.855828	0.89077	0.996359	0.830787	0.827103
0.91	0.956856	0.956835	0.9034	0.999988	1	0.886536	0.915474	0.91033	0.964662	0.993292	0.999985	0.94408	0.938615	0.884415	0.965901	0.973815	0.950033	0.96777	1	0.954789	1	0.943425	1	1	0.939082	0.96521	0.947674	0.952339	0.944739	0.999901	0.969804	0.960057	0.943632	0.796936	0.971077	0.984485	0.965421	1	0.910654	0.946958	0.969254	0.985576	1	0.923605	0.939636	0.973507	1	0.91133	0.926038
0.975	0.9961	0.994377	0.960603	1	1	0.948591	0.98225	0.963803	0.999344	1	1	0.985831	0.996345	0.958812	0.990669	0.995639	0.978411	0.997013	1	0.995737	1	0.983713	1	1	0.982446	0.99939	0.986214	0.987528	0.997071	1	0.996661	0.999828	0.97765	0.921584	0.999751	0.995987	0.985813	1	0.977542	0.986118	0.99603	0.998456	1	0.980323	0.993401	0.99804	1	0.971783	0.975974
1.04	1	1	1	1	1	1	1	1	1	1	1	1	1	1	1	1	1	1	1	1	1	1	1	1	1	1	1	1	1	1	1	1	1	1	1	1	1	1	1	1	1	1	1	1	1	1	1	1	1
1.105	0.968925	0.970181	0.99683	1	1	0.978576	0.977229	0.997744	0.999459	1	1	0.978526	0.967769	0.986438	0.980329	1	0.976973	0.966539	1	0.986603	1	0.993382	1	1	0.977744	0.975693	0.989458	0.998107	0.982037	1	0.977228	0.999997	0.985688	0.999911	0.986713	0.976101	0.998316	1	0.996108	0.992495	0.991591	0.951849	1	0.993041	0.984242	0.974835	1	0.993202	0.98668
1.17	0.910406	0.916425	0.964497	0.974306	1	0.937135	0.923879	0.973533	0.970934	0.937398	0.97625	0.919286	0.889951	0.977423	0.922385	0.977805	0.912466	0.893874	1	0.935977	1	0.965028	1	1	0.92958	0.931364	0.959419	0.976286	0.940014	1	0.920916	0.999699	0.942747	0.973528	0.947575	0.9447	0.967239	1	0.956283	0.95282	0.953832	0.882132	1	0.958278	0.9148	0.921704	1	0.979882	0.929342
1.235	0.825579	0.820661	0.898952	0.924334	0.930383	0.872176	0.839539	0.912961	0.915818	0.827745	0.903933	0.80759	0.770169	0.950719	0.831465	0.900377	0.834858	0.800234	0.98176	0.850165	1	0.907438	1	1	0.862178	0.884378	0.896755	0.9392	0.852321	0.998788	0.845985	0.938524	0.893193	0.884358	0.895839	0.884806	0.894292	1	0.900765	0.882846	0.883532	0.801101	0.967784	0.892175	0.864134	0.859866	0.999181	0.927363	0.826345
1.3	0.744269	0.702983	0.827817	0.853323	0.808114	0.76941	0.755396	0.837363	0.85192	0.70455	0.810624	0.687259	0.646512	0.890755	0.706296	0.802937	0.756457	0.711951	0.913182	0.734108	0.959041	0.832876	1	0.970666	0.789145	0.819412	0.804311	0.901813	0.778817	0.927501	0.756215	0.831014	0.819199	0.779423	0.827772	0.806995	0.8039	1	0.823372	0.790189	0.821658	0.718801	0.827712	0.819409	0.796186	0.787274	0.961815	0.825965	0.709408
1.365	0.669593	0.576196	0.744436	0.767969	0.67847	0.676235	0.676225	0.731214	0.77289	0.597258	0.734627	0.580767	0.55357	0.790714	0.564575	0.678381	0.689966	0.628036	0.827073	0.620792	0.888579	0.723757	0.970291	0.894986	0.71895	0.75162	0.7308	0.865599	0.683892	0.82559	0.666447	0.707717	0.744163	0.683629	0.749258	0.721029	0.707867	0.99868	0.735782	0.694465	0.759262	0.640408	0.664842	0.744954	0.745554	0.722501	0.852291	0.736171	0.601227
1.43	0.612256	0.460347	0.666228	0.684642	0.56149	0.602215	0.612236	0.63885	0.695785	0.515048	0.673347	0.491527	0.473883	0.654504	0.447773	0.569231	0.622653	0.562851	0.757014	0.526666	0.807517	0.601004	0.841382	0.826504	0.672006	0.697306	0.649077	0.82024	0.615343	0.723829	0.595	0.597014	0.679836	0.604182	0.674884	0.646333	0.637762	0.980457	0.643155	0.606325	0.713319	0.56537	0.521858	0.667281	0.711224	0.65994	0.730874	0.640643	0.518255
1.495	0.561639	0.36532	0.594586	0.599157	0.486656	0.552421	0.571829	0.57357	0.627133	0.453451	0.625284	0.426583	0.437017	0.511655	0.358266	0.492253	0.574512	0.510655	0.684259	0.466343	0.736898	0.502424	0.713069	0.753451	0.641619	0.63967	0.585536	0.786833	0.555664	0.631017	0.534411	0.503918	0.613842	0.553337	0.608062	0.590235	0.582452	0.868431	0.549939	0.532376	0.674546	0.497252	0.395797	0.608188	0.693115	0.609759	0.624037	0.543393	0.461201
1.56	0.518732	0.29978	0.545398	0.533876	0.450375	0.515921	0.541445	0.527229	0.572662	0.407879	0.581485	0.363811	0.41402	0.399551	0.29206	0.433188	0.538598	0.472337	0.621996	0.420647	0.675247	0.42067	0.608957	0.684175	0.619788	0.583603	0.545617	0.745089	0.514085	0.553036	0.484348	0.424939	0.549509	0.521783	0.55621	0.551517	0.54162	0.709272	0.471959	0.462508	0.646149	0.434678	0.307956	0.559898	0.677026	0.563579	0.54181	0.472228	0.420935
1.625	0.478076	0.265258	0.503303	0.476525	0.433625	0.48924	0.530982	0.495198	0.528323	0.370358	0.529502	0.329734	0.401501	0.338635	0.247308	0.385822	0.512096	0.428389	0.570656	0.383047	0.624179	0.365567	0.52372	0.613157	0.600743	0.539751	0.501821	0.702871	0.476111	0.469539	0.439479	0.35859	0.509282	0.482237	0.521154	0.516367	0.502157	0.561185	0.412981	0.410777	0.619376	0.380175	0.253042	0.509786	0.650889	0.51668	0.477718	0.411835	0.384444
1.69	0.448665	0.244927	0.469228	0.429696	0.420709	0.465069	0.512876	0.474951	0.498703	0.337068	0.488112	0.298565	0.387253	0.295601	0.213207	0.353474	0.481963	0.400217	0.517359	0.353504	0.581796	0.320264	0.458991	0.549615	0.583995	0.507849	0.465139	0.662016	0.448234	0.417598	0.400584	0.315854	0.473305	0.456683	0.490376	0.488472	0.484793	0.45087	0.370573	0.372836	0.593173	0.338227	0.227486	0.450749	0.6311	0.474071	0.428052	0.363634	0.361994
1.755	0.418945	0.232149	0.449202	0.397013	0.402964	0.454207	0.491355	0.456742	0.469195	0.312633	0.446135	0.282356	0.369486	0.267324	0.181105	0.334278	0.446007	0.374633	0.482209	0.332087	0.544426	0.284764	0.41416	0.504425	0.565351	0.471779	0.439447	0.618278	0.425126	0.367207	0.369577	0.280164	0.437347	0.430489	0.464206	0.451118	0.459897	0.373277	0.329562	0.337848	0.568329	0.304572	0.212788	0.393342	0.604122	0.437376	0.398493	0.331296	0.335778
1.82	0.388878	0.220838	0.434506	0.379501	0.378197	0.447519	0.47964	0.442823	0.448677	0.293523	0.409296	0.256842	0.360875	0.23566	0.166648	0.316972	0.419578	0.351605	0.451115	0.316842	0.515696	0.258116	0.3682	0.46515	0.553656	0.440377	0.415827	0.581599		0.325047	0.343398	0.253429	0.410967	0.395962	0.447558	0.429065	0.435483	0.31516	0.308316	0.312095	0.546438	0.278814	0.211387	0.349254	0.57578	0.395893	0.376088	0.297875	0.2994
1.885		0.213339	0.41292	0.353255	0.356021	0.444277	0.46642	0.4307	0.433173	0.278329	0.377443		0.351469	0.21578	0.149943	0.295593	0.394757	0.331833	0.419136	0.300665	0.488596	0.238346	0.334981	0.433542	0.542529	0.414885	0.396324	0.537882		0.300241	0.313345	0.233393	0.393427	0.370819	0.431906	0.407697	0.411345	0.287527	0.282241	0.286524	0.537442	0.258224	0.203667	0.299601	0.547294	0.356842	0.36167	0.276433	0.272934
1.95		0.203258		0.340928	0.326168	0.43166	0.454577	0.428541	0.42174	0.261876	0.346248		0.335792	0.20711	0.140926	0.277927	0.364222	0.318709	0.389661	0.284652	0.467262	0.221979	0.315068	0.406505	0.524156	0.391496	0.378396	0.498699		0.28173	0.290896	0.216827	0.368466	0.35209	0.411568	0.389691	0.39185	0.267945	0.25783	0.266579	0.518309	0.244089	0.201029	0.266532	0.523035		0.347359	0.260357	0.249499
2.015		0.199497		0.324109	0.291563		0.44117		0.407341	0.241802	0.323645		0.318701	0.195984	0.13134	0.266397	0.341495	0.309003	0.365587	0.265839	0.44908	0.206772	0.281315	0.385089	0.509237	0.365015	0.35986	0.468381		0.253691	0.269329		0.344705	0.333855	0.395719	0.374854	0.374436	0.256248	0.243644	0.250383	0.496908	0.236513	0.205516	0.24419	0.496791		0.329293	0.241112	0.231568
2.08		0.198053		0.319506			0.427822			0.230791	0.302142		0.311564	0.186513	0.12001	0.250847	0.318378	0.30021	0.337529		0.426965	0.195975	0.257511	0.368272	0.495456	0.346177	0.344709	0.432953		0.235161	0.253319		0.326725	0.314932		0.353136	0.359076	0.24081	0.235028	0.23537	0.484547	0.227657	0.208281	0.225656	0.467626		0.317046	0.232458	0.214015
2.145		0.196161					0.421432			0.215953	0.275297		0.300269		0.115381	0.237793	0.294405	0.291055	0.307418		0.409751	0.187666	0.234821	0.350323	0.472511	0.32559	0.331037	0.395418		0.222967	0.233604		0.318309			0.333542	0.347149	0.232403		0.227001	0.471521		0.206549		0.445273		0.300498	0.221548
2.21		0.197104					0.417442			0.19983	0.26501		0.298645		0.111195	0.231158	0.273332	0.279016	0.288006		0.392754		0.216617	0.331425				0.360261		0.203853	0.216836		0.295379			0.320986	0.337065	0.221073		0.210269	0.454245		0.203661		0.418264		0.295659	0.214363
2.275							0.402136			0.188029	0.250668					0.216975	0.251759	0.279165			0.374998		0.194385	0.316618				0.331089		0.195905	0.203136					0.300823				0.195539	0.440348		0.204746		0.39344		0.278647	0.206239
2.34							0.390624				0.23547						0.236672	0.279544			0.359244		0.178408					0.303294								0.291942				0.187559					0.364088		0.268488	0.196772
2.405											0.223549						0.220841	0.274886			0.338607		0.156283					0.275297								0.279139				0.17837					0.344968
2.47											0.20998						0.206598						0.141802																	0.170754					0.324711
2.535											0.199531						0.196732						0.128527																	0.165642					0.303466
2.6											0.19559						0.185299						0.118013																						0.302724
2.665																							0.109209
2.73
2.795
2.86
2.925
2.99
																																								0.545377
																																								0.536798
																																								0.592674
																								0.573894																0.577819		0.63198
																					0.727982			0.557474						0.564929										0.58756		0.6392
										0.500152	0.705528	0.717533						0.652692			0.684663			0.620504	0.695772		0.7666			0.625687										0.548246		0.664761
										0.558456	0.698855	0.681962						0.664869	0.659253		0.655157	0.610839		0.621937	0.667602	0.706849	0.74168	0.622854		0.586467					0.660271		0.579321			0.586159		0.652376	0.505399			0.642028	0.555425
0	0.661371	0.720455	0.667354	0.600122						0.570368	0.682902	0.663228			0.617585	0.585046		0.685465	0.537338		0.705833	0.577032		0.609624	0.589373	0.681259	0.788829	0.666538		0.525684					0.687583		0.659106	0.767664		0.690477	0.791357	0.592886	0.583349			0.593594	0.598174
0.065	0.612296	0.677441	0.767304	0.619853	0.577335					0.564101	0.613018	0.606717			0.599405	0.594448	0.5243	0.693247	0.737033		0.702382	0.586607	0.429858	0.587382	0.649609	0.700787	0.778594	0.655346	0.632163	0.596051					0.638009	0.711455	0.656105	0.653803		0.638903	0.625705	0.642685	0.57443	0.646962		0.66689	0.576161
0.13	0.63353	0.671382	0.776137	0.705496	0.612228	0.704416	0.643967	0.622632	0.579487	0.651684	0.64493	0.712636	0.689426		0.600979	0.655962	0.594551	0.737307	0.702474	0.754673	0.747051	0.579225	0.501931	0.626831	0.703241	0.723703	0.798766	0.652519	0.77766	0.617583	0.656374		0.681156		0.698885	0.661405	0.685361	0.681815		0.641346	0.748542	0.682945	0.62063	0.625232	0.699514	0.718518	0.641086	0.596351	0.580613
0.195	0.646058	0.798469	0.748449	0.687952	0.63895	0.695888	0.720127	0.70353	0.699924	0.630281	0.654327	0.71929	0.7185	0.730809	0.638847	0.645378	0.570828	0.714727	0.697396	0.759042	0.658633	0.67678	0.46332	0.650132	0.70101	0.753646	0.700555	0.702195	0.780459	0.654566	0.617743	0.597725	0.709297	0.814034	0.757084	0.721285	0.719181	0.799666	0.654229	0.64006	0.780333	0.709268	0.565237	0.653459	0.682463	0.709958	0.664299	0.611469	0.643033
0.26	0.705967	0.788379	0.711128	0.697311	0.620223	0.689089	0.720804	0.675679	0.698823	0.601521	0.698029	0.748976	0.726056	0.731087	0.641996	0.597279	0.579618	0.765657	0.648341	0.787911	0.687784	0.690141	0.465894	0.635557	0.742559	0.690221	0.74026	0.698432	0.671573	0.658629	0.648556	0.575037	0.770003	0.788565	0.751366	0.723581	0.681531	0.832929	0.690613	0.648369	0.753089	0.75417	0.52873	0.725536	0.669772	0.719901	0.694767	0.577037	0.573282
0.325	0.706739	0.763666	0.71132	0.720177	0.650999	0.702107	0.743502	0.635613	0.67347	0.587443	0.720643	0.769637	0.762516	0.734851	0.611044	0.634459	0.61243	0.734836	0.763455	0.819852	0.678204	0.641159	0.499356	0.620867	0.773291	0.699296	0.81966	0.693223	0.686243	0.634953	0.659606	0.607137	0.753615	0.775525	0.75134	0.752614	0.684088	0.782615	0.705793	0.630916	0.773012	0.816655	0.645795	0.711197	0.70463	0.674284	0.703577	0.649108	0.616534
0.39	0.716846	0.907461	0.717005	0.807093	0.618337	0.76395	0.742625	0.720009	0.715605	0.643049	0.596006	0.838523	0.760002	0.71172	0.641081	0.65724	0.591957	0.84428	0.685385	0.815148	0.723416	0.715467	0.541828	0.631641	0.815288	0.757168	0.833283	0.664899	0.688169	0.684575	0.696402	0.611066	0.72048	0.778484	0.805664	0.70826	0.691538	0.78893	0.761481	0.671636	0.812148	0.808455	0.685365	0.684245	0.759395	0.652687	0.690392	0.666294	0.634884
0.455	0.757543	0.901978	0.782771	0.825735	0.675383	0.737451	0.695265	0.75351	0.792658	0.680784	0.655511	0.880906	0.839716	0.875032	0.650555	0.651191	0.583034	0.890355	0.774339	0.838498	0.813299	0.762653	0.568855	0.681112	0.75242	0.737297	0.853169	0.730581	0.744639	0.763519	0.729812	0.667346	0.808433	0.794861	0.790382	0.720901	0.707555	0.827524	0.842449	0.683598	0.802373	0.871894	0.615581	0.689026	0.69037	0.749388	0.688663	0.648976	0.641555
0.52	0.774641	0.872741	0.830538	0.876404	0.720469	0.79371	0.779701	0.717952	0.733046	0.680038	0.729352	0.887928	0.795223	0.789256	0.606072	0.731941	0.657434	0.840946	0.839956	0.868734	0.778528	0.791221	0.559846	0.706257	0.844392	0.756243	0.901999	0.756745	0.700645	0.69653	0.716766	0.711863	0.8289	0.790305	0.819257	0.774817	0.769011	0.867118	0.76899	0.694876	0.848723	0.898626	0.645414	0.732132	0.72031	0.698712	0.71397	0.617438	0.612411
0.585	0.8302	0.84795	0.83119	0.881333	0.748685	0.763262	0.831165	0.710926	0.841416	0.805903	0.834784	0.935921	0.830576	0.822074	0.723129	0.776753	0.713005	0.902749	0.923164	0.844297	0.760366	0.782546	0.60103	0.72302	0.826391	0.79389	0.981432	0.761233	0.781966	0.812984	0.723179	0.759969	0.774121	0.78042	0.889329	0.764667	0.763581	0.852679	0.782751	0.771529	0.83703	0.874678	0.781149	0.731905	0.796561	0.776583	0.754013	0.664342	0.626315
0.65	0.8792	0.933071	0.884233	0.966955	0.758554	0.853399	0.839194	0.820533	0.816053	0.805606	0.818572	0.950048	0.818802	0.842678	0.733004	0.784653	0.742405	0.874392	0.946175	0.870456	0.854802	0.862399	0.545689	0.82938	0.819289	0.90491	0.880102	0.853891	0.852626	0.812563	0.762379	0.803694	0.841813	0.831711	0.872013	0.802978	0.786153	0.944326	0.735374	0.801782	0.835121	0.887055	0.828952	0.767571	0.870068	0.804527	0.815756	0.730806	0.737142
0.715	0.845483	0.893863	0.917239	0.860519	0.775897	0.872481	0.82949	0.824366	0.811537	0.821943	0.960377	0.900245	0.812061	0.834088	0.747856	0.916923	0.761986	0.920868	1	0.916545	0.92048	0.878154	0.642214	0.841114	0.903404	0.932959	0.959663	0.918214	0.855099	0.840946	0.689268	0.803263	0.883378	0.783103	0.876915	0.809513	0.783584	0.96774	0.742724	0.897237	0.834142	0.934959	0.947628	0.82321	0.84738	0.888971	0.884239	0.757714	0.716544
0.78	0.843061	0.901915	0.893223	0.932886	0.897471	0.997194	0.905807	0.813549	0.846413	0.940184	0.915496	0.902544	0.871654	0.833696	0.84949	0.900265	0.838884	0.947614	0.97409	0.935442	0.912229	0.911318	0.711712	0.869186	0.967568	0.945449	1	0.90819	0.852222	0.88911	0.895426	0.891596	0.930337	0.879955	0.884797	0.932138	0.77635	0.980468	0.765709	0.875614	0.929248	0.923566	0.963159	0.892441	0.791322	0.856077	0.903988	0.78299	0.867106
0.845	0.86244	1	0.875844	0.911226	1	0.99086	0.915184	0.845406	0.935435	0.92573	1	0.932521	0.881263	0.781292	0.896954	0.911622	0.883538	0.950149	0.974062	0.924694	0.908917	0.938735	0.862291	0.865368	0.95995	0.909726	0.988266	0.862489	0.967896	0.890686	0.994585	0.875165	0.85004	0.964248	0.943064	0.937645	0.886793	0.984283	0.770003	0.931991	0.87656	1	0.88334	0.839431	0.911259	0.881983	0.908459	0.826897	0.91811
0.91	0.89487	0.981993	0.912522	0.988517	0.97463	0.955099	1	0.838669	0.915889	0.961442	0.925296	0.926842	0.962194	0.904132	1	0.924226	1	0.950271	0.92373	0.944462	1	0.943847	0.88417	0.874262	0.911081	0.936443	0.968737	0.810987	1	0.907679	0.986552	0.915721	1	0.912647	0.886533	0.961632	0.890089	0.968712	0.860113	1	0.871081	0.981676	1	0.987767	0.917416	0.881712	0.919183	0.875859	0.942451
0.975	0.906056	0.925332	0.911041	0.852955	0.911544	0.931924	0.984711	0.951602	0.870888	0.927694	0.981628	0.89578	1	0.934997	0.94973	0.957263	0.874732	0.978235	0.942265	1	0.977974	0.92198	0.854569	0.961745	0.946911	1	0.979497	0.947857	0.896465	1	0.980206	0.938187	0.937866	0.920704	0.952725	0.938031	0.863404	0.942562	0.869337	0.907596	0.899465	0.906027	0.984618	0.962788	0.865693	0.916603	0.904474	0.919038	0.960422
1.04	1	0.92891	0.886769	0.889986	0.925067	1	0.971012	1	1	0.884315	0.960531	0.943745	0.937444	0.95132	0.932826	0.984652	0.913304	0.96864	0.914778	0.991148	0.921914	0.973158	0.89704	0.876981	1	0.950638	0.964897	0.892848	0.901931	0.973033	1	0.911499	0.998902	1	1	0.949594	0.896254	0.960624	0.958466	0.96967	0.91111	0.864527	0.970922	0.896618	0.952375	0.926181	0.894288	0.978741	1
1.105	0.98421	0.932204	0.983358	1	0.937148	0.962275	0.96079	0.999877	0.996031	1	0.953045	1	0.913906	0.949055	0.923728	1	0.961439	1	0.903893	0.846571	0.840642	1	1	0.991657	0.9534	0.885162	0.945713	0.936533	0.945757	0.933023	0.996065	1	0.972067	0.997976	0.979064	1	0.970932	0.998885	0.969563	0.955142	0.991769	0.820855	0.977545	1	1	1	0.869521	1	0.907197
1.17	0.909442	0.890351	0.911695	0.895997	0.904743	0.918372	0.972844	0.952439	0.968907	0.990578	0.988392	0.968522	0.900282	0.949119	0.962091	0.919029	0.970384	0.916579	0.813074	0.854006	0.880002	0.931184	0.942085	1	0.903524	0.890183	0.916541	0.947601	0.996281	0.88294	0.995739	0.953691	0.97839	0.948763	0.950691	0.888356	0.903331	0.993421	0.957369	0.966626	1	0.857602	0.931199	0.984396	0.862732	0.950801	0.926306	0.99524	0.88938
1.235	0.961358	0.856682	0.887445	0.922776	0.893249	0.986047	0.920784	0.99336	0.971634	0.89028	0.920381	0.882598	0.893422	0.957317	0.990939	0.907445	0.930086	0.922026	0.835648	0.891979	0.869389	0.866405	0.853282	0.944378	0.806653	0.88292	0.895871	1	0.914135	0.923856	0.915715	0.896982	0.985852	0.998565	0.956152	0.973325	0.938424	1	0.931039	0.932082	0.948564	0.828144	0.874465	0.920798	0.868737	0.815615	1	0.926175	0.853496
1.3	0.891498	0.82481	0.953198	0.972933	0.852934	0.878766	0.900923	0.854471	0.889548	0.811048	0.892528	0.892641	0.94581	0.998802	0.872954	0.878978	0.967718	0.932196	0.793392	0.967543	0.767845	0.854619	0.872587	0.923466	0.807481	0.896991	0.901982	0.919991	0.837279	0.845964	0.916639	0.818501	0.938204	0.907049	0.937734	0.983442	0.923673	0.862891	1	0.926563	0.882178	0.822415	0.778438	0.898853	0.87908	0.7423	0.958589	0.937392	0.831419
1.365	0.914109	0.80737	1	0.886819	0.81505	0.905714	0.907177	0.880373	0.942428	0.830495	0.96757	0.869338	0.882884	0.955944	0.927821	0.765292	0.891047	0.839677	0.798829	0.919293	0.784165	0.769407	0.777349	0.914206	0.828879	0.824622	0.918979	0.850683	0.856738	0.815277	0.84396	0.776005	0.851044	0.949759	0.849922	0.95811	1	0.878922	0.936613	0.882877	0.911953	0.748128	0.776084	0.886608	0.84354	0.810449	0.851599	0.933616	0.738689
1.43	0.883647	0.827526	0.876264	0.831981	0.807106	0.965795	0.932266	0.873041	0.969807	0.807907	0.873278	0.838482	0.81593	1	0.813873	0.759544	0.844262	0.818429	0.759999	0.912006	0.820907	0.766301	0.718147	0.86895	0.883454	0.822048	0.798701	0.798122	0.863628	0.757446	0.868422	0.753775	0.879283	0.925284	0.856554	0.953167	0.832456	0.835477	0.905015	0.89815	0.893008	0.684484	0.730381	0.791964	0.834711	0.809871	0.847068	0.894524	0.710255
1.495	0.867547	0.83076	0.832282	0.779794	0.777891	0.967417	0.795254	0.807637	0.880693	0.777992	0.92783	0.831062	0.845089	0.935768	0.750459	0.780992	0.814875	0.807231	0.805916	0.873884	0.78612	0.714244	0.747748	0.822444	0.84344	0.822594	0.850652	0.779662	0.82805	0.794881	0.837459	0.717265	0.839749	0.90221	0.852262	0.846984	0.705705	0.866182	0.868197	0.899851	0.9122	0.748946	0.710244	0.861917	0.778768	0.790197	0.826415	0.812419	0.753188
1.56	0.846211	0.770541	0.841494	0.745061	0.815645	0.890792	0.846934	0.761081	0.861769	0.753408	0.797684	0.793444	0.861142	0.95023	0.725376	0.785971	0.800139	0.773985	0.740877	0.942378	0.782899	0.660617	0.782497	0.871016	0.84055	0.833251	0.921948	0.845109	0.845953	0.789778	0.804734	0.697715	0.881938	0.8991	0.832896	0.948652	0.820728	0.76649	0.842766	0.849865	0.912243	0.745843	0.717433	0.854148	0.831616	0.821947	0.810544	0.781791	0.825613
1.625	0.81523	0.794117	0.858116	0.806508	0.788855	0.855636	0.840774	0.824297	0.868091	0.718609	0.804513	0.829472	0.848432	0.918958	0.67061	0.778052	0.824997	0.809306	0.735332	0.879781	0.78623	0.602511	0.671815	0.847118	0.808812	0.774119	0.81275	0.837672	0.788963	0.680691	0.768604	0.687199	0.887847	0.904151	0.81945	0.862529	0.79139	0.743235	0.787918	0.81346	0.880905	0.75842	0.736285	0.782136	0.869914	0.786773	0.824168	0.753674	0.698261
1.69	0.879812	0.779419	0.970269	0.813385	0.781934	0.768204	0.845724	0.833489	0.810525	0.693306	0.820529	0.8209	0.82794	0.938382	0.71406	0.745991	0.790616	0.772644	0.7159	0.867631	0.752267	0.646469	0.701416	0.811292	0.761422	0.868464	0.838467	0.775221	0.793234	0.661822	0.764976	0.643518	0.88543	0.875939	0.841756	0.881305	0.847047	0.743372	0.780977	0.765595	0.891223	0.708063	0.627271	0.781966	0.826154	0.7814	0.818865	0.700665	0.717791
1.755	0.833521	0.807651	0.909675	0.733953	0.740581	0.804668	0.806172	0.82114	0.761792	0.748619	0.824747	0.812437	0.827501	0.850332	0.672825	0.739093	0.758683	0.768381	0.7557	0.868113	0.768824	0.68962	0.631918	0.791415	0.725008	0.829754	0.892915	0.778375	0.779996	0.742825	0.731261	0.677203	0.847781	0.893409	0.845019	0.896372	0.837219	0.882891	0.739925	0.779088	0.844363	0.669185	0.623857	0.744253	0.823587	0.770018	0.731972	0.775384	0.76042
1.82	0.736154	0.830892	0.930455	0.73822	0.727292	0.792794	0.787184	0.783143	0.771572	0.732734	0.803841	0.772673	0.852234	0.825667	0.71074	0.754573	0.716559	0.729395	0.75283	0.846341	0.770086	0.606928	0.635779	0.808146	0.829648	0.738084	0.817447	0.781996		0.69672	0.719347	0.684199	0.77884	0.915574	0.77332	0.890496	0.789752	0.767533	0.76848	0.756521	0.861103	0.727267	0.645808	0.789769	0.818991	0.768907	0.7822	0.796698	0.689027
1.885		0.782182	0.857528	0.720063	0.738593	0.831075	0.778094	0.801665	0.805263	0.697376	0.816633		0.817477	0.891312	0.669843	0.67584	0.69963	0.731035	0.793966	0.835696	0.714054	0.65277	0.622909	0.756644	0.77492	0.751313	0.81918	0.841392		0.647416	0.635592	0.655671	0.862508	0.833256	0.789775	0.818899	0.891182	0.726579	0.763362	0.748754	0.860564	0.733684	0.716489	0.7784	0.82494	0.727684	0.797186	0.721127	0.764157
1.95		0.780272		0.739047	0.669373	0.803807	0.783929	0.792795	0.808767	0.663609	0.792666		0.805826	0.895777	0.678421	0.674273	0.748212	0.717886	0.75122	0.801596	0.676088	0.663237	0.633205	0.699296	0.778067	0.736907	0.84375	0.734025		0.634996	0.69052	0.648013	0.830362	0.845129	0.785641	0.774037	0.810436	0.767077	0.734213	0.769333	0.835044	0.665702	0.689483	0.674941	0.827762		0.748442	0.739447	0.61096
2.015		0.79235		0.683834	0.670589		0.771272		0.839355	0.588561	0.697282		0.842692	0.868461	0.673097	0.66392	0.731911	0.71776	0.663052	0.825625	0.722675	0.667564	0.593308	0.720107	0.776111	0.744542	0.871693	0.714829		0.713159	0.661492		0.810456	0.892302	0.773475	0.797351	0.792036	0.664167	0.72857	0.714539	0.862185	0.631609	0.642262	0.721899	0.773842		0.796403	0.746822	0.6657
2.08		0.775985		0.71982			0.843874			0.636596	0.718032		0.850758	0.887114	0.665983	0.628415	0.683687	0.762684	0.660542		0.772272	0.684015	0.544402	0.727098	0.747466	0.794118	0.824271	0.792409		0.642954	0.722191		0.764163	0.861257		0.806293	0.792845	0.686664	0.749868	0.729292	0.906603	0.731442	0.646846	0.745093	0.761737		0.732341	0.703287	0.630125
2.145		0.780192					0.841418			0.662912	0.781641		0.78035		0.698468	0.685228	0.72859	0.770729	0.678985		0.743445	0.631188	0.620335	0.72854	0.7651	0.77101	0.798621	0.756361		0.628003	0.659519		0.807469			0.8644	0.758149	0.768634		0.776331	0.867476		0.670263		0.729442		0.634829	0.703441
2.21		0.789807					0.80654			0.645123	0.81763		0.725124		0.648384	0.668898	0.713503	0.725262	0.650934		0.715991		0.513514	0.741113				0.733492		0.718229	0.667586		0.80414			0.779582	0.739961	0.786808		0.763646	0.829895		0.629528		0.761143		0.715957	0.677794
2.275							0.82784			0.667737	0.693855					0.649035	0.638659	0.730233			0.750287		0.56242	0.714233				0.69839		0.653888	0.703801					0.722684				0.710065	0.823057		0.756257		0.731094		0.687485	0.691315
2.34							0.769611				0.826908						0.650063	0.732527			0.776634		0.550837					0.707123								0.801701				0.745425					0.732969		0.719303	0.707428
2.405											0.750074						0.656146	0.646849			0.718182		0.567568					0.699435								0.775094				0.763595					0.760792
2.47											0.728127						0.643704						0.6139																	0.698919					0.843438
2.535											0.7185						0.629256						0.531532																	0.702591					0.763124
2.6											0.733203						0.648228						0.576577																						0.632911
2.665																							0.501931
2.73
2.795
2.86
2.925
2.99
[truncated: 9 more columns]

## Sheet: Nup82_raw
	WellJ02_PointJ02_0000_ChannelBF,GFP_BP_dual,mCherrydual_Seq0045.nd2_1_x	WellJ02_PointJ02_0000_ChannelBF,GFP_BP_dual,mCherrydual_Seq0045.nd2_1_I_GFP	WellJ02_PointJ02_0000_ChannelBF,GFP_BP_dual,mCherrydual_Seq0045.nd2_1_I_mCh	WellJ02_PointJ02_0000_ChannelBF,GFP_BP_dual,mCherrydual_Seq0045.nd2_2_x	WellJ02_PointJ02_0000_ChannelBF,GFP_BP_dual,mCherrydual_Seq0045.nd2_2_I_GFP	WellJ02_PointJ02_0000_ChannelBF,GFP_BP_dual,mCherrydual_Seq0045.nd2_2_I_mCh	WellJ02_PointJ02_0000_ChannelBF,GFP_BP_dual,mCherrydual_Seq0045.nd2_3_x	WellJ02_PointJ02_0000_ChannelBF,GFP_BP_dual,mCherrydual_Seq0045.nd2_3_I_GFP	WellJ02_PointJ02_0000_ChannelBF,GFP_BP_dual,mCherrydual_Seq0045.nd2_3_I_mCh	WellJ02_PointJ02_0000_ChannelBF,GFP_BP_dual,mCherrydual_Seq0045.nd2_4_x	WellJ02_PointJ02_0000_ChannelBF,GFP_BP_dual,mCherrydual_Seq0045.nd2_4_I_GFP	WellJ02_PointJ02_0000_ChannelBF,GFP_BP_dual,mCherrydual_Seq0045.nd2_4_I_mCh	WellJ02_PointJ02_0000_ChannelBF,GFP_BP_dual,mCherrydual_Seq0045.nd2_5_x	WellJ02_PointJ02_0000_ChannelBF,GFP_BP_dual,mCherrydual_Seq0045.nd2_5_I_GFP	WellJ02_PointJ02_0000_ChannelBF,GFP_BP_dual,mCherrydual_Seq0045.nd2_5_I_mCh	WellJ02_PointJ02_0001_ChannelBF,GFP_BP_dual,mCherrydual_Seq0046.nd2_1_x	WellJ02_PointJ02_0001_ChannelBF,GFP_BP_dual,mCherrydual_Seq0046.nd2_1_I_GFP	WellJ02_PointJ02_0001_ChannelBF,GFP_BP_dual,mCherrydual_Seq0046.nd2_1_I_mCh	WellJ02_PointJ02_0001_ChannelBF,GFP_BP_dual,mCherrydual_Seq0046.nd2_2_x	WellJ02_PointJ02_0001_ChannelBF,GFP_BP_dual,mCherrydual_Seq0046.nd2_2_I_GFP	WellJ02_PointJ02_0001_ChannelBF,GFP_BP_dual,mCherrydual_Seq0046.nd2_2_I_mCh	WellJ02_PointJ02_0001_ChannelBF,GFP_BP_dual,mCherrydual_Seq0046.nd2_3_x	WellJ02_PointJ02_0001_ChannelBF,GFP_BP_dual,mCherrydual_Seq0046.nd2_3_I_GFP	WellJ02_PointJ02_0001_ChannelBF,GFP_BP_dual,mCherrydual_Seq0046.nd2_3_I_mCh	WellJ02_PointJ02_0001_ChannelBF,GFP_BP_dual,mCherrydual_Seq0046.nd2_4_x	WellJ02_PointJ02_0001_ChannelBF,GFP_BP_dual,mCherrydual_Seq0046.nd2_4_I_GFP	WellJ02_PointJ02_0001_ChannelBF,GFP_BP_dual,mCherrydual_Seq0046.nd2_4_I_mCh	WellJ02_PointJ02_0001_ChannelBF,GFP_BP_dual,mCherrydual_Seq0046.nd2_5_x	WellJ02_PointJ02_0001_ChannelBF,GFP_BP_dual,mCherrydual_Seq0046.nd2_5_I_GFP	WellJ02_PointJ02_0001_ChannelBF,GFP_BP_dual,mCherrydual_Seq0046.nd2_5_I_mCh	WellJ02_PointJ02_0001_ChannelBF,GFP_BP_dual,mCherrydual_Seq0046.nd2_7_x	WellJ02_PointJ02_0001_ChannelBF,GFP_BP_dual,mCherrydual_Seq0046.nd2_7_I_GFP	WellJ02_PointJ02_0001_ChannelBF,GFP_BP_dual,mCherrydual_Seq0046.nd2_7_I_mCh	WellJ02_PointJ02_0002_ChannelBF,GFP_BP_dual,mCherrydual_Seq0047.nd2_1_x	WellJ02_PointJ02_0002_ChannelBF,GFP_BP_dual,mCherrydual_Seq0047.nd2_1_I_GFP	WellJ02_PointJ02_0002_ChannelBF,GFP_BP_dual,mCherrydual_Seq0047.nd2_1_I_mCh	WellJ02_PointJ02_0002_ChannelBF,GFP_BP_dual,mCherrydual_Seq0047.nd2_2_x	WellJ02_PointJ02_0002_ChannelBF,GFP_BP_dual,mCherrydual_Seq0047.nd2_2_I_GFP	WellJ02_PointJ02_0002_ChannelBF,GFP_BP_dual,mCherrydual_Seq0047.nd2_2_I_mCh	WellJ02_PointJ02_0002_ChannelBF,GFP_BP_dual,mCherrydual_Seq0047.nd2_3_x	WellJ02_PointJ02_0002_ChannelBF,GFP_BP_dual,mCherrydual_Seq0047.nd2_3_I_GFP	WellJ02_PointJ02_0002_ChannelBF,GFP_BP_dual,mCherrydual_Seq0047.nd2_3_I_mCh	WellJ02_PointJ02_0002_ChannelBF,GFP_BP_dual,mCherrydual_Seq0047.nd2_4_x	WellJ02_PointJ02_0002_ChannelBF,GFP_BP_dual,mCherrydual_Seq0047.nd2_4_I_GFP	WellJ02_PointJ02_0002_ChannelBF,GFP_BP_dual,mCherrydual_Seq0047.nd2_4_I_mCh	WellJ02_PointJ02_0002_ChannelBF,GFP_BP_dual,mCherrydual_Seq0047.nd2_5_x	WellJ02_PointJ02_0002_ChannelBF,GFP_BP_dual,mCherrydual_Seq0047.nd2_5_I_GFP	WellJ02_PointJ02_0002_ChannelBF,GFP_BP_dual,mCherrydual_Seq0047.nd2_5_I_mCh	WellJ02_PointJ02_0002_ChannelBF,GFP_BP_dual,mCherrydual_Seq0047.nd2_6_x
1	0	354	3386	0	341	2031	0	298	2683	0	271	1158	0	280	1882	0	321	1956	0	302	2274	0	311	1554	0	272	2554	0	259	3501	0	289	2184	0	266	2869	0	312	4927	0	307	3081	0	322	1845	0	361	2998	0
2	0.065	330.194	3777.76	0.065	341.998	2248.68	0.065	295.554	3037.72	0.065	252.242	1334.66	0.065	298.38	2074.24	0.065	287.423	2159.28	0.065	314.302	2367.38	0.065	322.338	1530.35	0.065	285.628	3004.1	0.065	326.111	4200.96	0.065	273.316	2409.33	0.065	312.279	3621.64	0.065	289.444	5112.41	0.065	291.193	3459.41	0.065	323.087	1974.37	0.065	324.607	3203.69	0.065
3	0.13	331.049	4280.93	0.13	349.618	2424.47	0.13	308.362	3453.46	0.13	281.037	1394.24	0.13	274.1	2385.82	0.13	313.719	2431.74	0.13	334.028	2436.97	0.13	304.811	1557.32	0.13	263.931	3490.53	0.13	306.585	4647.99	0.13	289.662	2686.1	0.13	305.076	4578.38	0.13	321.268	5921.33	0.13	319.449	3958.94	0.13	307.338	2145.72	0.13	329.838	3601.5	0.13
4	0.195	341.736	5089.01	0.195	374.11	2773.91	0.195	309.592	3867.11	0.195	274.749	1531.61	0.195	311.294	2787.23	0.195	316.005	2737.81	0.195	333.97	2613.73	0.195	307.361	1589.16	0.195	258.22	4076.07	0.195	319.255	5111.21	0.195	308.215	3303.68	0.195	316.715	5995.31	0.195	346.428	7096.54	0.195	319.452	4552.52	0.195	316.586	2454.12	0.195	310.63	3875.72	0.195
5	0.26	360.354	6055.19	0.26	326.855	3028.12	0.26	318.472	4342.61	0.26	276.648	1683.29	0.26	281.71	3563.36	0.26	299.488	3306.97	0.26	332.908	2720.07	0.26	307.486	1682.23	0.26	261.815	4747.65	0.26	309.384	5611.91	0.26	293.379	3885.85	0.26	323.042	7935.13	0.26	324.272	7971.18	0.26	304.037	5169.39	0.26	321.789	2805.93	0.26	312.588	4160.44	0.26
6	0.325	343.961	7144.95	0.325	345.194	3755.06	0.325	328.596	4713.81	0.325	270.778	1976.87	0.325	271.607	4719.15	0.325	355.443	3961.99	0.325	284.306	3275.55	0.325	318.267	1664.69	0.325	279.371	5517.9	0.325	308.46	5901.39	0.325	300.553	4845.24	0.325	306.442	10511.8	0.325	383.984	9208.28	0.325	315.218	5884.43	0.325	347.007	3313.77	0.325	335.435	4494.37	0.325
7	0.39	313.95	8966.75	0.39	367.345	4520.9	0.39	352.949	5274.11	0.39	270.209	2574.09	0.39	286.017	6309.81	0.39	334.955	5054.52	0.39	297.931	3594.2	0.39	313.144	1717.84	0.39	283.82	6777.88	0.39	313.034	6615.88	0.39	314.459	6002.48	0.39	302.981	13687.9	0.39	383.871	10455.2	0.39	308.736	7053.93	0.39	324.843	3816.12	0.39	356.705	5069.99	0.39
8	0.455	341.678	11068.9	0.455	352.482	6115.5	0.455	361.899	5858.23	0.455	277.591	3574.47	0.455	309.179	8212.31	0.455	340.095	6510.69	0.455	326.148	4253.35	0.455	333.626	1701.24	0.455	284.792	8356.53	0.455	333.044	7429.83	0.455	309.695	7544.58	0.455	356.928	16872.7	0.455	399.115	12529.9	0.455	332.113	8239.56	0.455	301.036	4731.67	0.455	301.614	6269.54	0.455
9	0.52	337.038	13434	0.52	372.634	8521.77	0.52	376.058	6530.33	0.52	260.717	5193.99	0.52	301.769	10268.4	0.52	373.38	8447.61	0.52	323.222	5239.54	0.52	325.012	1845.81	0.52	275.81	10194.1	0.52	337.327	8245.46	0.52	313.202	9224.99	0.52	374.79	19606.4	0.52	380.29	15119.8	0.52	330.047	9649.85	0.52	295.18	6067.68	0.52	331.84	8213.5	0.52
10	0.585	344.363	15859.7	0.585	382.142	11284.2	0.585	412.536	7277.28	0.585	308.336	6958.56	0.585	294.553	11878.6	0.585	361.173	9963.64	0.585	338.317	6898.01	0.585	322.443	1994.29	0.585	319.747	12278	0.585	311.395	9714.66	0.585	308.829	10892.6	0.585	411.413	21265.4	0.585	348.346	18976.1	0.585	346.122	10144.4	0.585	305.522	8107.82	0.585	380.79	11500.8	0.585
11	0.65	380.071	18406.5	0.65	379.25	14434	0.65	435.37	8048.66	0.65	280.596	9472.51	0.65	300.567	13072.9	0.65	383.219	11557.4	0.65	302.685	9311.25	0.65	312.328	2354.86	0.65	297.018	13791.8	0.65	296.866	11338.8	0.65	327.549	12717.9	0.65	415.447	21843	0.65	373.334	23359.8	0.65	346.084	10896.7	0.65	319.75	10972.4	0.65	364.113	15597.3	0.65
12	0.715	363.387	19438.8	0.715	347.298	18022.2	0.715	392.793	9348.11	0.715	273.86	11671.4	0.715	318.118	13834.8	0.715	390.51	12935.5	0.715	397.839	12204.3	0.715	326.05	3031.88	0.715	295.939	15332.6	0.715	317.489	13773.6	0.715	336.821	14155.4	0.715	380.36	20883.7	0.715	378.659	28399.3	0.715	357.843	11059.6	0.715	307.44	13975.9	0.715	359.446	19652	0.715
13	0.78	337.463	19904.3	0.78	408.892	20847.6	0.78	383.874	10360.3	0.78	304.651	13208.7	0.78	328.83	14239.6	0.78	396.038	14034.6	0.78	390.04	14839.9	0.78	343.403	4117.09	0.78	313.911	15987.8	0.78	332.23	16742	0.78	331.049	15292.8	0.78	389.902	18522.8	0.78	383.814	32594.2	0.78	363.594	10714.3	0.78	310.721	16209.1	0.78	404.539	24098.4	0.78
14	0.845	336.36	19875.2	0.845	350.7	22901.6	0.845	406.014	11299.5	0.845	289.151	14326	0.845	341.867	14120.1	0.845	412.126	14582.6	0.845	390.523	16768.1	0.845	322.714	5688.02	0.845	307.442	16099.2	0.845	356.678	19805.1	0.845	340.617	16528	0.845	395.082	15848.7	0.845	342.528	35720.3	0.845	397.912	10050.8	0.845	334.574	17752.2	0.845	427.353	27098.4	0.845
15	0.91	369.767	18764.6	0.91	428.939	23292.7	0.91	350.779	12060.7	0.91	298.186	14310.4	0.91	345.157	13844.8	0.91	387.703	15006.7	0.91	394.2	17716.3	0.91	309.411	7464.23	0.91	315.349	15659.9	0.91	347.139	22450	0.91	325.454	17130.9	0.91	390.215	13495.6	0.91	382.718	36757.6	0.91	398.416	9421.39	0.91	324.982	17267.9	0.91	423.532	29061.7	0.91
16	0.975	350.258	16745.2	0.975	387.523	21794.3	0.975	350.14	12287.7	0.975	308.001	13192.5	0.975	329.163	13033.8	0.975	398.627	15208.2	0.975	416.685	17379.9	0.975	302.31	9601.65	0.975	342.787	14429.6	0.975	349.646	23588.2	0.975	319.215	17152.2	0.975	381.516	11542.8	0.975	367.599	36748.1	0.975	420.524	8470.82	0.975	310.856	15863	0.975	430.645	28584.4	0.975
17	1.04	377.318	14727	1.04	394.61	19628.7	1.04	387.41	11867.6	1.04	314.36	11834.8	1.04	362.878	11607.4	1.04	423.82	14932.6	1.04	437.359	15964.6	1.04	288.202	11018.2	1.04	352.94	12894.5	1.04	367.48	23407.4	1.04	339.288	16250.4	1.04	390.385	9896.82	1.04	336.864	34111.9	1.04	406.152	7895.18	1.04	332.046	13456.5	1.04	446.282	26920.2	1.04
18	1.105	343.486	12179.7	1.105	364.004	16375.9	1.105	366.893	11075.9	1.105	314.011	10161.2	1.105	380.986	10001.5	1.105	456.345	14287.3	1.105	383.423	14688.7	1.105	297.994	11800.5	1.105	319.31	11148.4	1.105	371.152	21731	1.105	403.141	15483	1.105	392.03	8530.82	1.105	333.061	29946.2	1.105	426.005	7111.9	1.105	319.157	10188.7	1.105	467.069	23741.2	1.105
19	1.17	343.547	9855.03	1.17	404.475	12653.6	1.17	335.556	9923.7	1.17	325.982	8376.04	1.17	366.577	8738.54	1.17	489.511	13225.8	1.17	359.158	13128.1	1.17	287.229	11505.6	1.17	371.256	9320.05	1.17	356.021	19052.8	1.17	366.604	13937.3	1.17	364.273	7502.75	1.17	371.418	24882.9	1.17	417.919	6413.49	1.17	328.788	7499	1.17	470.839	20299.2	1.17
20	1.235	351.291	7917.43	1.235	357.696	9704.69	1.235	336.459	8896.64	1.235	285.525	6993.88	1.235	336.469	7628.88	1.235	470.254	11620.3	1.235	398.479	11335.2	1.235	290.262	10352.4	1.235	376.903	8146.17	1.235	334.378	15628.7	1.235	344.969	12336.5	1.235	335.439	6623.42	1.235	327.42	19057.5	1.235	415.47	6099.26	1.235	327.782	5447.64	1.235	451.634	16335.1	1.235
21	1.3	350.727	6843.43	1.3	370.649	7152.91	1.3	371.636	7617.38	1.3	297.847	5806.79	1.3	373.698	6906.59	1.3	450.671	10074.3	1.3	387.222	10191.3	1.3	317.332	9051.71	1.3	384.695	7338.8	1.3	321.681	12557.7	1.3	365.154	10903.5	1.3	361.187	5977.07	1.3	323.747	13818.6	1.3	400.718	5592.31	1.3	335.748	4028.07	1.3	416.618	13219.6	1.3
22	1.365	339.092	6093.33	1.365	402.388	5662.16	1.365	349.954	6705.54	1.365	289.392	4850.07	1.365	368.745	6485.04	1.365	458.734	8449.46	1.365	395.854	9175.29	1.365	313.556	7324.61	1.365	393.895	6632.37	1.365	321.809	10002.6	1.365	381.333	9573.08	1.365	371.557	5349.98	1.365	310.89	10320.8	1.365	389.067	5334.18	1.365	349.041	3252.1	1.365	422.109	11008	1.365
23	1.43	369.917	5639.95	1.43	393.142	4629.72	1.43	360.822	5809.68	1.43	295.355	4046.62	1.43	351.321	6101.15	1.43	450.387	6925.83	1.43	349.019	8559.13	1.43	315.918	5899.59	1.43	385.702	5816.79	1.43	344.361	8018.94	1.43	421.619	8644.21	1.43	326.019	4958.96	1.43	301.035	7542.58	1.43	377.471	4979.21	1.43	333.502	2913.84	1.43	463.132	9499.29	1.43
24	1.495	382.646	5308.17	1.495	361.098	4165.35	1.495	359.946	4894.17	1.495	309.148	3567.38	1.495	344.207	5858.81	1.495	443.082	5759.8	1.495	340.795	8069.43	1.495	318.406	4706.29	1.495	375.705	5601.27	1.495	345.838	6828.7	1.495	416.522	7658.53	1.495	374.574	4216.67	1.495	322.069	6176.19	1.495	335.132	4818.88	1.495	353.216	2789.09	1.495	419.45	8621.32	1.495
25	1.56	334.477	4893.29	1.56	397.564	3640.5	1.56	365.415	4311.09	1.56	309.513	3331.35	1.56	347.487	5617.88	1.56	440.262	4972.7	1.56	359.461	7957.68	1.56	299.888	4008.43	1.56	372.87	5217.77	1.56	337.232	6076.96	1.56	403.629	6892.06	1.56	381.396	3814.57	1.56	320.183	5267.95	0	0	0	0	0	0	1.56	413.638	7940.81	1.56
26	1.625	361.712	4764.85	1.625	378.397	3425.27	1.625	371.34	3859.07	1.625	305.658	3105.26	1.625	311.47	5465.59	1.625	413.267	4387.85	1.625	362.921	7766.53	1.625	293.662	3357.44	1.625	357.086	4768.98	1.625	319.601	5604.38	1.625	399.3	6467	1.625	380.348	3503.51	1.625	306.764	4628.69	0	0	0	0	0	0	1.625	412.493	7459.9	1.625
27	1.69	361.289	4805.27	1.69	354.834	3254.37	1.69	342.919	3532.25	1.69	310.298	2962.94	1.69	314.909	5302.21	1.69	419.548	3963.96	1.69	343.921	7522.28	1.69	316.018	2876.92	1.69	348.058	4506.24	1.69	294.82	5164.92	1.69	376.715	5956.76	1.69	367.496	3160.63	1.69	325.553	4110.48	0	0	0	0	0	0	1.69	381.137	7005.67	1.69
28	1.755	329.524	4671.97	1.755	347.096	3068.81	1.755	337.841	3172.57	1.755	268.163	2906.71	1.755	356.75	5039.23	1.755	418.509	3639.55	1.755	384.109	7313.83	1.755	282.293	2587.15	1.755	361.945	4348.37	1.755	297.262	4707.75	1.755	406.592	5230.37	1.755	349.431	2952.78	1.755	340.433	3741.02	0	0	0	0	0	0	1.755	382.216	6711.73	1.755
29	1.82	358.601	4542.41	1.82	357.801	2844.31	1.82	355.434	3038.1	1.82	279.789	2909.27	0	0	0	1.82	393.875	3258.92	1.82	352.752	7369.91	1.82	291.596	2412.85	1.82	344.932	4192.73	1.82	283.09	4405.49	1.82	401.828	4758.85	0	0	0	1.82	333.625	3592.61	0	0	0	0	0	0	1.82	377.173	6682.84	1.82
30	0	0	0	1.885	380.817	2691.57	1.885	349.468	2878.57	1.885	283.345	2806.03	0	0	0	1.885	383.544	3110.73	0	0	0	1.885	337.49	2205.61	1.885	362.018	4020.7	1.885	280.632	4142.81	1.885	363.151	4380.46	0	0	0	1.885	338.136	3358.35	0	0	0	0	0	0	1.885	399.673	6247.83	1.885
31	0	0	0	1.95	352.182	2646.53	1.95	327.056	2874.22	1.95	294.789	2912.72	0	0	0	1.95	383.336	2947.43	0	0	0	1.95	301.217	2099.68	0	0	0	1.95	287.418	3985.14	0	0	0	0	0	0	1.95	308.21	3125.15	0	0	0	0	0	0	1.95	397.116	6072.63	1.95
32	0	0	0	2.015	350.164	2747.51	2.015	341.535	2876.12	2.015	288.479	2780	0	0	0	2.015	374.475	2825.61	0	0	0	0	0	0	0	0	0	2.015	296.046	3737.55	0	0	0	0	0	0	0	0	0	0	0	0	0	0	0	0	0	0	2.015
33	0	0	0	2.08	340.318	2628.59	0	0	0	0	0	0	0	0	0	2.08	357.68	2761.88	0	0	0	0	0	0	0	0	0	0	0	0	0	0	0	0	0	0	0	0	0	0	0	0	0	0	0	0	0	0	0
34	0	0	0	2.145	349.075	2548.62	0	0	0	0	0	0	0	0	0	0	0	0	0	0	0	0	0	0	0	0	0	0	0	0	0	0	0	0	0	0	0	0	0	0	0	0	0	0	0	0	0	0	0
35	0	0	0	2.21	374.226	2547.67	0	0	0	0	0	0	0	0	0	0	0	0	0	0	0	0	0	0	0	0	0	0	0	0	0	0	0	0	0	0	0	0	0	0	0	0	0	0	0	0	0	0	0
36	0	0	0	0	0	0	0	0	0	0	0	0	0	0	0	0	0	0	0	0	0	0	0	0	0	0	0	0	0	0	0	0	0	0	0	0	0	0	0	0	0	0	0	0	0	0	0	0	0
37	0	0	0	0	0	0	0	0	0	0	0	0	0	0	0	0	0	0	0	0	0	0	0	0	0	0	0	0	0	0	0	0	0	0	0	0	0	0	0	0	0	0	0	0	0	0	0	0	0
38	0	0	0	0	0	0	0	0	0	0	0	0	0	0	0	0	0	0	0	0	0	0	0	0	0	0	0	0	0	0	0	0	0	0	0	0	0	0	0	0	0	0	0	0	0	0	0	0	0
39	0	0	0	0	0	0	0	0	0	0	0	0	0	0	0	0	0	0	0	0	0	0	0	0	0	0	0	0	0	0	0	0	0	0	0	0	0	0	0	0	0	0	0	0	0	0	0	0	0
40	0	0	0	0	0	0	0	0	0	0	0	0	0	0	0	0	0	0	0	0	0	0	0	0	0	0	0	0	0	0	0	0	0	0	0	0	0	0	0	0	0	0	0	0	0	0	0	0	0
41	0	0	0	0	0	0	0	0	0	0	0	0	0	0	0	0	0	0	0	0	0	0	0	0	0	0	0	0	0	0	0	0	0	0	0	0	0	0	0	0	0	0	0	0	0	0	0	0	0
42	0	0	0	0	0	0	0	0	0	0	0	0	0	0	0	0	0	0	0	0	0	0	0	0	0	0	0	0	0	0	0	0	0	0	0	0	0	0	0	0	0	0	0	0	0	0	0	0	0
[truncated: 65 more columns]

## Sheet: Nup82_normalized
0	354	341	298	271	280	321	302	311	272	259	289	266	312	307	322	361	296	295	309	316	291	373	284	304	318	279	281	265	271	292	288	261	308	301	260	250	372	288
0.065	330.194	341.998	295.554	252.242	298.38	287.423	314.302	322.338	285.628	326.111	273.316	312.279	289.444	291.193	323.087	324.607	326.049	277.847	309.44	299.87	308.358	321.064	261.052	305	310.449	294.83	320.727	279.085	283.889	272.409	289.727	304.697	293.787	282.402	259.903	259.438	303.048	259.257
0.13	331.049	349.618	308.362	281.037	274.1	313.719	334.028	304.811	263.931	306.585	289.662	305.076	321.268	319.449	307.338	329.838	335.97	281.915	308.36	318.119	297.483	310.927	308.807	284	327.061	294.52	319.435	285.779	299.734	275.877	298.14	288.232	336.99	307.257	281.799	274.67	296.196	272.774
0.195	341.736	374.11	309.592	274.749	311.294	316.005	333.97	307.361	258.22	319.255	308.215	316.715	346.428	319.452	316.586	310.63	329.514	275.162	328.96	328.965	314.072	334.688	268.779	315	346.036	311.919	323.123	298.902	307.254	289.275	318.611	301.257	348.175	314.06	289.859	254.544	303.68	299.533
0.26	360.354	326.855	318.472	276.648	281.71	299.488	332.908	307.486	261.815	309.384	293.379	323.042	324.272	304.037	321.789	312.588	374.195	317.784	352.92	325.506	273.065	346.534	294.599	284	326.287	295.419	325.909	299.825	314.927	288.184	309.448	315.006	317.054	331.029	270.005	253.038	329.627	306.651
0.325	343.961	345.194	328.596	270.778	271.607	355.443	284.306	318.267	279.371	308.46	300.553	306.442	383.984	315.218	347.007	335.435	372.127	281.106	366	344.688	281.848	359.556	270.716	290	312.901	307.718	312.384	295.897	311.985	302.728	293.555	266.943	329.125	344.672	290.186	254.792	326.421	285.701
0.39	313.95	367.345	352.949	270.209	286.017	334.955	297.931	313.144	283.82	313.034	314.459	302.981	383.871	308.736	324.843	356.705	379.992	321.227	337.96	366.206	299.674	365.548	285.231	308	322.764	297.931	294.28	297.089	305.465	313.07	320.847	312.022	348.489	335.628	296.879	270.484	318.526	307.061
0.455	341.678	352.482	361.899	277.591	309.179	340.095	326.148	333.626	284.792	333.044	309.695	356.928	399.115	332.113	301.036	301.614	370.594	342.768	377.84	383.678	335.321	374.52	297.254	303	333.675	308.043	319.676	298.826	316.101	293.743	323.687	298.933	348.78	344.113	262.996	266.169	291.903	297.687
0.52	337.038	372.634	376.058	260.717	301.769	373.38	323.222	325.012	275.81	337.327	313.202	374.79	380.29	330.047	295.18	331.84	371.062	342.024	385.64	377.435	318.025	372.063	319.808	327	346.119	299.909	327.635	317.356	309.308	307.067	325.847	290.725	345.994	345.114	288.293	284.391	298.306	263.937
0.585	344.363	382.142	412.536	308.336	294.553	361.173	338.317	322.443	319.747	311.395	308.829	411.413	348.346	346.122	305.522	380.79	364.267	340.432	412.6	365.934	322.831	387.224	308.872	310	380.641	306.457	321.364	317.418	327.801	283.144	329.813	331.04	371.545	352.264	333.59	305.553	316.725	301.988
0.65	380.071	379.25	435.37	280.596	300.567	383.219	302.685	312.328	297.018	296.866	327.549	415.447	373.334	346.084	319.75	364.113	399.626	333.05	415	354.253	349.64	387.384	326.191	320	359.231	317.009	319.096	305.575	312.706	297.498	352.84	331.829	372.401	345.623	330.665	291.164	331.557	339.182
0.715	363.387	347.298	392.793	273.86	318.118	390.51	397.839	326.05	295.939	317.489	336.821	380.36	378.659	357.843	307.44	359.446	389.462	366.326	432.56	353.933	356.658	414.308	351.842	349	415.112	327.545	327.081	309.008	318.755	334.309	372.182	353.734	356.832	358.751	330.053	267.278	268.565	338.353
0.78	337.463	408.892	383.874	304.651	328.83	396.038	390.04	343.403	313.911	332.23	331.049	389.902	383.814	363.594	310.721	404.539	411.992	374.774	461.8	365.466	341.287	416.629	400.073	385	417.342	310.548	306.91	302.774	312.235	336.829	358.715	365.255	371.124	377.619	323.519	269.5	339.382	363.922
0.845	336.36	350.7	406.014	289.151	341.867	412.126	390.523	322.714	307.442	356.678	340.617	395.082	342.528	397.912	334.574	427.353	409.101	364.02	474.56	365.603	383.86	431.993	397.058	351	422.692	338.865	313.931	333.843	311.452	324.753	398.336	361.365	393.081	376.708	308.253	267.226	323.831	394.836
0.91	369.767	428.939	350.779	298.186	345.157	387.703	394.2	309.411	315.349	347.139	325.454	390.215	382.718	398.416	324.982	423.532	438.01	379.931	445.16	388.704	374.999	420.554	384.452	367	471.115	330.365	332.002	375.214	324.482	359.902	413.496	366.596	411.141	341.938	312.621	301.438	333.591	402.164
0.975	350.258	387.523	350.14	308.001	329.163	398.627	416.685	302.31	342.787	349.646	319.215	381.516	367.599	420.524	310.856	430.645	459.74	392.294	465	413.173	367.958	420.284	415.393	394	483.046	321.512	335.023	354.472	342.485	355.584	401.318	383.63	439.565	383.969	325.554	288.797	335.472	416.172
1.04	377.318	394.61	387.41	314.36	362.878	423.82	437.359	288.202	352.94	367.48	339.288	390.385	336.864	406.152	332.046	446.282	435.152	401.548	424.48	383.432	373.077	404.676	351.87	395	470.517	333.56	326.391	354.496	362.388	339.667	404.753	400.81	439.117	358.393	338.638	287.081	387.122	408.771
1.105	343.486	364.004	366.893	314.011	380.986	456.345	383.423	297.994	319.31	371.152	403.141	392.03	333.061	426.005	319.157	467.069	443.34	419.913	436.36	391.941	394.814	399.172	417.617	385	420.468	328.562	349.659	394.748	379.855	351.18	420.165	402.69	431.879	363.665	352.54	294.842	366.158	410.947
1.17	343.547	404.475	335.556	325.982	366.577	489.511	359.158	287.229	371.256	356.021	366.604	364.273	371.418	417.919	328.788	470.839	471.576	429.016	453.68	425.279	386.224	394.833	331.085	388	397.544	374.08	359.243	374.649	372.6	356.143	434.4	454.567	483.633	368.868	350.441	311.766	356.122	435.575
1.235	351.291	357.696	336.459	285.525	336.469	470.254	398.479	290.262	376.903	334.378	344.969	335.439	327.42	415.47	327.782	451.634	456.919	420.703	464.8	439.378	407.023	393.038	385.409	367	383.254	379.134	355.712	348.296	347.082	355.266	429.758	443.051	471.118	371.603	343.481	287.302	353.26	445.635
1.3	350.727	370.649	371.636	297.847	373.698	450.671	387.222	317.332	384.695	321.681	365.154	361.187	323.747	400.718	335.748	416.618	436.544	377.489	421	448.193	423.33	382.129	352.279	352	422.964	352.346	369.042	346.689	379.527	362.391	405.991	430.586	474.879	367.942	332.523	275.189	342.646	453.787
1.365	339.092	402.388	349.954	289.392	368.745	458.734	395.854	313.556	393.895	321.809	381.333	371.557	310.89	389.067	349.041	422.109	429.062	367.961	0	434.993	393.277	366.94	339.169	397	377.202	369.202	406.77	347.501	371.643	342.738	402.307	426.728	479.982	372.499	347.987	297.683	327.894	450.329
1.43	369.917	393.142	360.822	295.355	351.321	450.387	349.019	315.918	385.702	344.361	421.619	326.019	301.035	377.471	333.502	463.132	405.952	384.959	0	406.158	380.633	384.385	341.424	397	402.121	367.192	412.519	346.48	395.788	367.851	370.569	409.032	470.369	369.776	356.717	329.64	325	426.601
1.495	382.646	361.098	359.946	309.148	344.207	443.082	340.795	318.406	375.705	345.838	416.522	374.574	322.069	335.132	353.216	419.45	408.4	377.556	0	393.811	402.914	371.936	376.999	403	425.651	383.474	395.76	340.353	335.931	343.233	354.604	456.57	470.753	347.016	344.392	294.59	338.063	397.819
1.56	334.477	397.564	365.415	309.513	347.487	440.262	359.461	299.888	372.87	337.232	403.629	381.396	320.183	0	0	413.638	395.72	336.012	0	389.734	384.463	362.96	359.548	370.002	400.401	375.793	369.933	372.362	358.788	348.617	376.115	399.174	443.41	390.317	375.212	298.442	334.009	415.093
1.625	361.712	378.397	371.34	305.658	311.47	413.267	362.921	293.662	357.086	319.601	399.3	380.348	306.764	0	0	412.493	413.041	368.824	0	388.328	396.179	379.102	351.472	367.434	404.453	313.882	338.156	333.656	384.068	393.58	355.854	382.583	467.269	421.076	0	281.426	338.639	399.703
1.69	361.289	354.834	342.919	310.298	314.909	419.548	343.921	316.018	348.058	294.82	376.715	367.496	325.553	0	0	381.137	391.212	402.284	0	364.366	394.037	356.426	350.302	417.108	371.551	379.188	372.295	366.732	384.269	390.767	376.355	394.466	451.083	401.086	0	291.724	336.478	353.455
1.755	329.524	347.096	337.841	268.163	356.75	418.509	384.109	282.293	361.945	297.262	406.592	349.431	340.433	0	0	382.216	420.345	370.592	0	347.519	372.968	348.188	384.819	425.402	354.772	383.879	381.362	336.163	392.386	321.572	384.728	381.838	423.587	380.363	0	282.495	324.997	378.573
1.82	358.601	357.801	355.434	279.789	0	393.875	352.752	291.596	344.932	283.09	401.828	0	333.625	0	0	377.173	406.46	373.131	0	363.146	389.488	355.372	379.846	389.063	334.432	396.691	394.677	373.245	358.273	320.335	404.69	369.548	422.73	367.54	0	326.927	340.316	334.076
1.885	0	380.817	349.468	283.345	0	383.544	0	337.49	362.018	280.632	363.151	0	338.136	0	0	399.673	397.897	384.583	0	374.774	340.565	0	390.267	421.355	356.127	378.735	362.961	390.248	327	0	363.859	379.294	388.65	347.178	0	312.259	331.247	382.499
1.95	0	352.182	327.056	294.789	0	383.336	0	301.217	0	287.418	0	0	308.21	0	0	397.116	383.288	375.767	0	0	350.374	0	0	424.416	358.699	355.728	353.696	379.331	0	0	0	353.09	420.044	378.76	0	308.162	306.501	395.168
2.015	0	350.164	341.535	288.479	0	374.475	0	0	0	296.046	0	0	0	0	0	0	351.855	370.896	0	0	0	0	0	409.371	351.126	363.18	381.062	371.332	0	0	0	373.775	443.999	363.534	0	277.796	0	345.725
2.08	0	340.318	0	0	0	357.68	0	0	0	0	0	0	0	0	0	0	0	395.432	0	0	0	0	0	393.569	0	428.746	368.852	344.318	0	0	0	376.42	0	0	0	284.403	0	0
2.145	0	349.075	0	0	0	0	0	0	0	0	0	0	0	0	0	0	0	0	0	0	0	0	0	386.944	0	421.303	364.995	355.8	0	0	0	381.988	0	0	0	0	0	0
2.21	0	374.226	0	0	0	0	0	0	0	0	0	0	0	0	0	0	0	0	0	0	0	0	0	410.088	0	354.317	336.412	0	0	0	0	359.069	0	0	0	0	0	0
2.275	0	0	0	0	0	0	0	0	0	0	0	0	0	0	0	0	0	0	0	0	0	0	0	431.398	0	342.306	369.098	0	0	0	0	0	0	0	0	0	0	0
2.34	0	0	0	0	0	0	0	0	0	0	0	0	0	0	0	0	0	0	0	0	0	0	0	404.145	0	0	382.89	0	0	0	0	0	0	0	0	0	0	0
2.405	0	0	0	0	0	0	0	0	0	0	0	0	0	0	0	0	0	0	0	0	0	0	0	0	0	0	352.875	0	0	0	0	0	0	0	0	0	0	0
2.47	0	0	0	0	0	0	0	0	0	0	0	0	0	0	0	0	0	0	0	0	0	0	0	0	0	0	330.282	0	0	0	0	0	0	0	0	0	0	0
2.535	0	0	0	0	0	0	0	0	0	0	0	0	0	0	0	0	0	0	0	0	0	0	0	0	0	0	336.829	0	0	0	0	0	0	0	0	0	0	0
2.6	0	0	0	0	0	0	0	0	0	0	0	0	0	0	0	0	0	0	0	0	0	0	0	0	0	0	330.309	0	0	0	0	0	0	0	0	0	0	0
2.665	0	0	0	0	0	0	0	0	0	0	0	0	0	0	0	0	0	0	0	0	0	0	0	0	0	0	330.201	0	0	0	0	0	0	0	0	0	0	0
0	3386	2031	2683	1158	1882	1956	2274	1554	2554	3501	2184	2869	4927	3081	1845	2998	4486	4689	2491	2709	1791	5082	1567	5235	6062	1982	2904	1921	2374	3573	3725	2385	2075	2032	2134	1678	1457	1647
0.065	3777.76	2248.68	3037.72	1334.66	2074.24	2159.28	2367.38	1530.35	3004.1	4200.96	2409.33	3621.64	5112.41	3459.41	1974.37	3203.69	5227.36	4988.97	2769.68	2918.5	2059.37	5542.42	1597.44	5940	7081.67	2017.92	3272.99	1892.18	2403.34	3950.67	4274.63	2724.22	2035.44	2236.83	2629.26	1910.31	1453.52	1727.42
0.13	4280.93	2424.47	3453.46	1394.24	2385.82	2431.74	2436.97	1557.32	3490.53	4647.99	2686.1	4578.38	5921.33	3958.94	2145.72	3601.5	6016.15	5761.28	2956.48	3394.41	2269.69	6453.66	1734.6	7118	8583.14	2200.3	3499.49	2019.34	2692.17	4571.28	4713.24	2958.12	2126.86	2458.34	3021.12	2147.86	1527	1743.72
0.195	5089.01	2773.91	3867.11	1531.61	2787.23	2737.81	2613.73	1589.16	4076.07	5111.21	3303.68	5995.31	7096.54	4552.52	2454.12	3875.72	6902.67	6728.68	3316.24	3878.68	2594.56	7096.51	2009.49	8029	10018.4	2456.43	3580.6	2188.99	2964.28	5070.84	5362.16	3341.28	2190.96	2693.08	3466.3	2354.9	1604.25	1835.44
0.26	6055.19	3028.12	4342.61	1683.29	3563.36	3306.97	2720.07	1682.23	4747.65	5611.91	3885.85	7935.13	7971.18	5169.39	2805.93	4160.44	7983.05	8041.85	4020.72	4732.54	3129.88	7990.56	2615.95	9471	11680.7	2739.45	3447.24	2354.06	3649.05	5840.55	6359.24	4006.22	2399.24	3005.77	3936.07	2666.57	1710.58	1998.38
0.325	7144.95	3755.06	4713.81	1976.87	4719.15	3961.99	3275.55	1664.69	5517.9	5901.39	4845.24	10511.8	9208.28	5884.43	3313.77	4494.37	10226	9590.78	5134	6040.98	4000.62	9222.84	3464.97	11673	13444.4	3131.11	3300.09	2692.77	4788.38	6754.4	7629.36	5034.05	2644.07	3446.67	4663.06	3233.03	1740.79	2230.86
0.39	8966.75	4520.9	5274.11	2574.09	6309.81	5054.52	3594.2	1717.84	6777.88	6615.88	6002.48	13687.9	10455.2	7053.93	3816.12	5069.99	13755.2	11138.7	6991.32	7882.94	5429.01	11075.1	5101.6	13546	15634.3	4062.23	3397.83	3492.69	6352.4	7866.95	9455.99	6908.31	2945.9	3995.21	5731.45	4270.27	1919.36	2793.56
0.455	11068.9	6115.5	5858.23	3574.47	8212.31	6510.69	4253.35	1701.24	8356.53	7429.83	7544.58	16872.7	12529.9	8239.56	4731.67	6269.54	18453.6	12956.9	9285.56	10351.5	7220.98	13896.7	7272.84	16247	18006.6	5327.82	3881.19	4501.22	8537.88	8972.61	12472.5	9274.65	3996.66	4471.72	7351.91	5904.53	2225.13	3646.66
0.52	13434	8521.77	6530.33	5193.99	10268.4	8447.61	5239.54	1845.81	10194.1	8245.46	9224.99	19606.4	15119.8	9649.85	6067.68	8213.5	24431.2	15084	11982.4	13705.7	9870.18	17314.2	9837.55	20145	19856	7185.5	4451.77	5846.11	11062.1	10739.2	16733.4	12107.1	5605.27	5319.33	9012.02	8162.51	2629.39	5030.68
0.585	15859.7	11284.2	7277.28	6958.56	11878.6	9963.64	6898.01	1994.29	12278	9714.66	10892.6	21265.4	18976.1	10144.4	8107.82	11500.8	29430	16981.2	14623.6	17007.3	12875.9	20817.3	12195.8	24286	20981.7	9160.45	5519.1	7539.85	13135	12610.2	21726	13890.9	8329.29	6258.19	10783.4	10695.2	3281.99	6628.98
0.65	18406.5	14434	8048.66	9472.51	13072.9	11557.4	9311.25	2354.86	13791.8	11338.8	12717.9	21843	23359.8	10896.7	10972.4	15597.3	33280.3	18995.6	16526	19463.9	15666.8	24109.6	13879.8	28742	21679.5	11563.7	6483.88	9398.31	14653.9	15119.2	26382	15491.1	12159	7570.53	12523.6	13314.4	4495.9	8322.7
0.715	19438.8	18022.2	9348.11	11671.4	13834.8	12935.5	12204.3	3031.88	15332.6	13773.6	14155.4	20883.7	28399.3	11059.6	13975.9	19652	35903.8	21366.3	16873.2	21723.1	17558.2	26435.5	14778.5	33349	21208.1	13437.6	7953.89	11605.7	15762	18702.3	30415.1	16514.8	16228.6	9384.33	13913.1	15779.7	6722.08	9659.95
0.78	19904.3	20847.6	10360.3	13208.7	14239.6	14034.6	14839.9	4117.09	15987.8	16742	15292.8	18522.8	32594.2	10714.3	16209.1	24098.4	37179.6	23205.4	15746.1	23588.7	18413.9	28304.2	14831.4	36490	20254.9	15083.4	9717.07	13281.6	16302.7	22868.8	33287.5	17338.4	19750.3	11485.9	15058.5	17460.3	9411.51	10817.4
0.845	19875.2	22901.6	11299.5	14326	14120.1	14582.6	16768.1	5688.02	16099.2	19805.1	16528	15848.7	35720.3	10050.8	17752.2	27098.4	36625.5	24146.2	13598.6	24237.5	18365.4	29168.1	13608.7	38477	18960.7	16067.5	11791.2	14560.6	17510.2	26937	34320	18162.9	22394.9	13835.4	14789.4	18461.9	12543.3	11609.8
0.91	18764.6	23292.7	12060.7	14310.4	13844.8	15006.7	17716.3	7464.23	15659.9	22450	17130.9	13495.6	36757.6	9421.39	17267.9	29061.7	34868.2	24856.2	11399.8	24213.3	17426.1	29280.9	12148.5	36592	17356.5	17044.6	13584.5	15232.3	18600.4	31514.6	35792.5	18162.5	23579.3	16091.4	14172.1	19599.7	14768.7	12095.4
0.975	16745.2	21794.3	12287.7	13192.5	13033.8	15208.2	17379.9	9601.65	14429.6	23588.2	17152.2	11542.8	36748.1	8470.82	15863	28584.4	31392.2	24630.8	9242	23599.7	15591.4	28968.2	10125.8	34562	15479.4	18149.2	15355.6	14727.6	19497.5	34900.6	36359.8	17943.7	22710.6	17391.1	13188	20642.4	16596.7	11829.6
1.04	14727	19628.7	11867.6	11834.8	11607.4	14932.6	15964.6	11018.2	12894.5	23407.4	16250.4	9896.82	34111.9	7895.18	13456.5	26920.2	25888.1	23565.7	7650.8	21251.9	13196.7	27102.7	8144.1	30301	13387.8	19185.2	16574.5	13474.5	19990.5	36232.5	35830	16806.7	20914.5	17443	11588.2	20964.6	16849.2	11253.3
1.105	12179.7	16375.9	11075.9	10161.2	10001.5	14287.3	14688.7	11800.5	11148.4	21731	15483	8530.82	29946.2	7111.9	10188.7	23741.2	20849	21774	6642.24	18847.3	10891.7	24425.8	6480.09	25419	11849.2	19844.3	17214.9	11936.1	19392.3	36339.1	33547.4	15094.7	18267.2	16330.9	10339.3	20404.3	15550.2	10351.3
1.17	9855.03	12653.6	9923.7	8376.04	8738.54	13225.8	13128.1	11505.6	9320.05	19052.8	13937.3	7502.75	24882.9	6413.49	7499	20299.2	16818.6	19303.4	6121.48	15845.8	8527.09	21690.6	5615.04	20959	10551.2	19678.8	17681.8	10670.1	17953	35155.1	29765.5	13113.6	14933.4	14563.3	9184.24	18838.5	13163.9	8918.26
1.235	7917.43	9704.69	8896.64	6993.88	7628.88	11620.3	11335.2	10352.4	8146.17	15628.7	12336.5	6623.42	19057.5	6099.26	5447.64	16335.1	13670	16683.8	5646.84	13711.6	6963.18	19163.6	5006.43	16214	9420.27	18513.9	17440.1	9767.05	15458.9	31950.7	25334.3	10982.6	11842	12410.8	8380.21	16343.5	10484.3	7481.45
1.3	6843.43	7152.91	7617.38	5806.79	6906.59	10074.3	10191.3	9051.71	7338.8	12557.7	10903.5	5977.07	13818.6	5592.31	4028.07	13219.6	11984.3	13934.2	5392	11764.7	6253.77	17236.4	4647.64	13108	9285.75	16769.9	16849.9	8809.36	13545.4	27593.1	20765	9326.16	9289.03	10250.2	7742.43	13833.3	7932.47	6415.39
1.365	6093.33	5662.16	6705.54	4850.07	6485.04	8449.46	9175.29	7324.61	6632.37	10002.6	9573.08	5349.98	10320.8	5334.18	3252.1	11008	10847.4	11959.3	0	10335.6	5429.26	15515.5	4357.59	10288	8669.56	14325	15673.2	7770.81	12162.9	22524.9	17208.8	7876.96	7864.55	8403.25	7358.93	11439.2	5823.57	5767.22
1.43	5639.95	4629.72	5809.68	4046.62	6101.15	6925.83	8559.13	5899.59	5816.79	8018.94	8644.21	4958.96	7542.58	4979.21	2913.84	9499.29	9772.88	10663.3	0	8906.41	4797.81	14305.7	4164.01	8044	8237.25	12734.3	14572	7317.22	11093.7	17902.1	15022.8	6812.82	6690.62	7585.75	7228.67	9310.9	4487.66	5124.45
1.495	5308.17	4165.35	4894.17	3567.38	5858.81	5759.8	8069.43	4706.29	5601.27	6828.7	7658.53	4216.67	6176.19	4818.88	2789.09	8621.32	9027.06	9271.98	0	8022.79	4497.34	13385.3	3950.03	6263	7990.76	11566.4	13557.3	6629.01	10331	14157.5	13754.2	6033.49	6181.71	6570.48	6773.07	7676.33	3650.47	4628.36
1.56	4893.29	3640.5	4311.09	3331.35	5617.88	4972.7	7957.68	4008.43	5217.77	6076.96	6892.06	3814.57	5267.95	0	0	7940.81	8363.87	8205.47	0	7067.49	4189.43	12400.6	3998.48	3503.6	7523.73	10691.7	12278.4	6269.43	9774.49	11052.1	12876.8	5246.77	6187.07	5860.7	6692.68	6713.87	3106.4	4334.82
1.625	4764.85	3425.27	3859.07	3105.26	5465.59	4387.85	7766.53	3357.44	4768.98	5604.38	6467	3503.51	4628.69	0	0	7459.9	7891.54	7596.39	0	6715.29	3937.26	11473.3	4007.4	3389.37	7294.66	10023.4	11503.6	5811.95	9269.22	8577.29	12270.1	5190.94	5974.72	5320.18	0	6032.43	2710.42	4107.39
1.69	4805.27	3254.37	3532.25	2962.94	5302.21	3963.96	7522.28	2876.92	4506.24	5164.92	5956.76	3160.63	4110.48	0	0	7005.67	7417.04	6757.52	0	6367.98	3845.98	10677	3865.13	8016.77	7053.26	9527.4	10718.2	5335.54	8740.68	6772.55	11944.7	5005.44	5953.15	4921.86	0	5477.57	2505.59	3790.67
1.755	4671.97	3068.81	3172.57	2906.71	5039.23	3639.55	7313.83	2587.15	4348.37	4707.75	5230.37	2952.78	3741.02	0	0	6711.73	6884.7	6311.53	0	6088.22	3689.91	10024.5	4554.96	7350.06	6875.69	8977.29	10071.8	5079.98	8601.93	5614.93	11060.3	4913.85	5841.01	4622.14	0	4984.49	2428.2	3367.03
1.82	4542.41	2844.31	3038.1	2909.27	0	3258.92	7369.91	2412.85	4192.73	4405.49	4758.85	0	3592.61	0	0	6682.84	6456.44	5786.59	0	5828.58	3651.91	9115.51	4382.39	6863.57	6570.27	8694.33	9436.98	4629.04	8325	4657.82	10366.6	4997.63	5957.82	4355.1	0	4510.1	2356.45	3356.7
1.885	0	2691.57	2878.57	2806.03	0	3110.73	0	2205.61	4020.7	4142.81	4380.46	0	3358.35	0	0	6247.83	5960.36	5616.37	0	5595.95	7621.95	0	4286.29	6625.2	9986.46	8480.95	8959.85	4501.57	8237	0	9542.57	4842.44	5867.87	4090.32	0	4181.96	2345.93	3107.91
1.95	0	2646.53	2874.22	2912.72	0	2947.43	0	2099.68	0	3985.14	0	0	3125.15	0	0	6072.63	5407.57	5384.83	0	0	7255.38	0	0	6243.13	9032.27	8235.4	8359.56	4279.86	0	0	0	4733.67	5898.02	3991.71	0	3807.46	2228.61	3073.68
2.015	0	2747.51	2876.12	2780	0	2825.61	0	0	0	3737.55	0	0	0	0	0	0	4889.6	4993.52	0	0	0	0	0	6045.15	8344.27	7995.97	7962.23	4026.9	0	0	0	4788.16	5790.04	4017.24	0	3537.72	0	2803.04
2.08	0	2628.59	0	0	0	2761.88	0	0	0	0	0	0	0	0	0	0	0	4695.78	0	0	0	0	0	5696.57	0	7892.12	7405.92	3961.97	0	0	0	4725.05	0	0	0	3252.26	0	0
2.145	0	2548.62	0	0	0	0	0	0	0	0	0	0	0	0	0	0	0	0	0	0	0	0	0	5307.73	0	7577.81	7069.46	3776.07	0	0	0	4712.12	0	0	0	0	0	0
2.21	0	2547.67	0	0	0	0	0	0	0	0	0	0	0	0	0	0	0	0	0	0	0	0	0	5268.15	0	7378.71	6925.74	0	0	0	0	4630.82	0	0	0	0	0	0
2.275	0	0	0	0	0	0	0	0	0	0	0	0	0	0	0	0	0	0	0	0	0	0	0	5058.51	0	7447.55	6615.2	0	0	0	0	0	0	0	0	0	0	0
2.34	0	0	0	0	0	0	0	0	0	0	0	0	0	0	0	0	0	0	0	0	0	0	0	4895.43	0	0	6273.52	0	0	0	0	0	0	0	0	0	0	0
2.405	0	0	0	0	0	0	0	0	0	0	0	0	0	0	0	0	0	0	0	0	0	0	0	0	0	0	6047.79	0	0	0	0	0	0	0	0	0	0	0
2.47	0	0	0	0	0	0	0	0	0	0	0	0	0	0	0	0	0	0	0	0	0	0	0	0	0	0	5901.98	0	0	0	0	0	0	0	0	0	0	0
2.535	0	0	0	0	0	0	0	0	0	0	0	0	0	0	0	0	0	0	0	0	0	0	0	0	0	0	5749.07	0	0	0	0	0	0	0	0	0	0	0
2.6	0	0	0	0	0	0	0	0	0	0	0	0	0	0	0	0	0	0	0	0	0	0	0	0	0	0	5585.25	0	0	0	0	0	0	0	0	0	0	0
2.665	0	0	0	0	0	0	0	0	0	0	0	0	0	0	0	0	0	0	0	0	0	0	0	0	0	0	5591.39	0	0	0	0	0	0	0	0	0	0	0
0	0.925137	0.794985	0.684475	0.831334	0.734935	0.655756	0.690508	0.905641	0.690539	0.697827	0.685453	0.640274	0.78173	0.720649	0.911623	0.766716	0.627682	0.68762	0.651129	0.705053	0.687407	0.86344	0.680049	0.704686	0.658322	0.650735	0.681181	0.671314	0.68471	0.741908	0.662983	0.571654	0.636847	0.714835	0.692942	0.758403	0.960937	0.634659
0.065	0.862923	0.797312	0.678857	0.773791	0.783178	0.587164	0.718636	0.938658	0.725137	0.878645	0.648254	0.75167	0.725215	0.683544	0.914701	0.689422	0.691403	0.647638	0.652057	0.669064	0.72841	0.743216	0.625099	0.707004	0.64269	0.687657	0.777484	0.706995	0.717275	0.692131	0.666959	0.667361	0.607459	0.670668	0.692683	0.787034	0.782823	0.571319
0.13	0.865157	0.815076	0.708276	0.862124	0.719449	0.640882	0.763739	0.887619	0.670054	0.826036	0.687023	0.734332	0.804951	0.749871	0.870113	0.700532	0.712441	0.65712	0.649781	0.709781	0.702721	0.71975	0.73945	0.658325	0.67708	0.686934	0.774352	0.723953	0.757309	0.700943	0.686326	0.631299	0.696789	0.729695	0.751039	0.833242	0.765123	0.601106
0.195	0.893087	0.872175	0.711101	0.842835	0.817075	0.645552	0.763606	0.895045	0.655555	0.860173	0.731027	0.762348	0.86799	0.749879	0.896296	0.659737	0.698751	0.641379	0.693189	0.733981	0.741908	0.774753	0.643602	0.730184	0.716362	0.727515	0.783292	0.757197	0.77631	0.734984	0.733451	0.659827	0.719916	0.745851	0.772521	0.772188	0.784456	0.660074
0.26	0.941742	0.762008	0.731497	0.84866	0.739423	0.611811	0.761178	0.895409	0.664682	0.833578	0.695839	0.777577	0.812478	0.713694	0.911026	0.663896	0.793499	0.740728	0.743678	0.726263	0.645041	0.802175	0.705429	0.658325	0.675478	0.68903	0.790046	0.759535	0.795696	0.732212	0.712357	0.68994	0.655567	0.78615	0.719607	0.767619	0.851481	0.67576
0.325	0.898901	0.804762	0.754751	0.830653	0.712905	0.726119	0.650052	0.926803	0.709252	0.831088	0.712854	0.73762	0.962089	0.73994	0.982422	0.71242	0.789114	0.655234	0.771241	0.769062	0.665788	0.832319	0.64824	0.672233	0.647766	0.717716	0.75726	0.749585	0.788263	0.769165	0.675771	0.58467	0.680526	0.818551	0.773392	0.77294	0.843199	0.629593
0.39	0.820471	0.856404	0.810687	0.828908	0.750728	0.684265	0.681205	0.911885	0.720547	0.843412	0.745837	0.729289	0.961805	0.724724	0.919672	0.757594	0.805792	0.748753	0.712154	0.817072	0.707897	0.84619	0.682997	0.713958	0.668185	0.694889	0.713373	0.752604	0.771789	0.795442	0.738598	0.683405	0.720565	0.797072	0.79123	0.820544	0.822805	0.676663
0.455	0.892935	0.821753	0.831245	0.851553	0.811523	0.694765	0.745721	0.971529	0.723015	0.897325	0.734538	0.859142	1	0.779599	0.852272	0.640588	0.785863	0.798963	0.79619	0.856055	0.792103	0.866958	0.711786	0.702368	0.690773	0.718474	0.774936	0.757004	0.798662	0.746336	0.745136	0.654736	0.721167	0.817223	0.700926	0.807454	0.754034	0.656006
0.52	0.880809	0.868734	0.863766	0.79979	0.792074	0.762761	0.739031	0.946445	0.700212	0.908865	0.742856	0.902137	0.952833	0.774749	0.835693	0.704784	0.786855	0.797229	0.812626	0.842126	0.751246	0.861271	0.765793	0.758001	0.716534	0.699503	0.79423	0.803946	0.781499	0.78019	0.750108	0.636759	0.715406	0.8196	0.768347	0.862732	0.770574	0.581632
0.585	0.899952	0.890901	0.947553	0.945868	0.773133	0.737824	0.773545	0.938964	0.811757	0.838996	0.732484	0.99029	0.872796	0.812483	0.864972	0.808748	0.772446	0.793518	0.869437	0.816465	0.762599	0.896366	0.739606	0.718594	0.788002	0.714775	0.779028	0.804103	0.828224	0.719406	0.759238	0.725059	0.768237	0.836581	0.889071	0.926929	0.818153	0.665484
0.65	0.993271	0.884158	1	0.860771	0.788919	0.782861	0.692074	0.909509	0.754054	0.79985	0.776884	1	0.935405	0.812394	0.905253	0.773328	0.847427	0.776311	0.874494	0.790403	0.825928	0.896737	0.781077	0.741774	0.743679	0.739386	0.77353	0.774101	0.790085	0.755877	0.812247	0.726787	0.770007	0.820809	0.881275	0.883279	0.856466	0.747448
0.715	0.949669	0.809668	0.902205	0.840108	0.834986	0.797755	0.909639	0.949468	0.751314	0.855415	0.798875	0.915544	0.948747	0.839997	0.870402	0.763416	0.825873	0.853875	0.911497	0.789689	0.842506	0.959062	0.842499	0.808998	0.859363	0.76396	0.792887	0.782798	0.805368	0.849405	0.856773	0.774764	0.737816	0.851986	0.879644	0.810818	0.693748	0.745621
0.78	0.88192	0.953264	0.881719	0.934564	0.863103	0.809048	0.891807	1	0.796941	0.895132	0.785185	0.938512	0.961663	0.853497	0.879691	0.859188	0.873649	0.873566	0.973112	0.815421	0.806196	0.964435	0.95799	0.892447	0.86398	0.724317	0.74399	0.767006	0.788895	0.855808	0.825771	0.799998	0.767367	0.896795	0.86223	0.817559	0.87668	0.801967
0.845	0.879037	0.817599	0.932572	0.887015	0.897322	0.841914	0.892912	0.939753	0.780518	0.961003	0.807879	0.950981	0.858219	0.934055	0.947222	0.907641	0.867519	0.8485	1	0.815727	0.906763	1	0.950771	0.813634	0.875055	0.790363	0.76101	0.845712	0.786916	0.825126	0.91698	0.791478	0.812767	0.894632	0.821544	0.81066	0.836509	0.870091
0.91	0.966342	1	0.805703	0.914731	0.905957	0.792021	0.901319	0.901014	0.800592	0.935301	0.771915	0.939265	0.958917	0.935238	0.920066	0.899526	0.928822	0.885587	0.938048	0.867269	0.885831	0.97352	0.920585	0.850723	0.9753	0.770538	0.804816	0.950515	0.819838	0.914432	0.951878	0.802935	0.850109	0.812058	0.833185	0.914446	0.861721	0.88624
0.975	0.915358	0.903445	0.804235	0.944841	0.863977	0.814337	0.95273	0.880336	0.87025	0.942056	0.757117	0.918327	0.921035	0.987134	0.880073	0.914633	0.974901	0.914404	0.979855	0.921864	0.869199	0.972895	0.994675	0.91331	1	0.749889	0.81214	0.89797	0.865324	0.903461	0.923844	0.840244	0.908881	0.911876	0.867653	0.876098	0.86658	0.917109
1.04	0.986076	0.919968	0.889841	0.964348	0.952471	0.865803	1	0.839253	0.896026	0.990106	0.804727	0.939675	0.844027	0.953397	0.940065	0.947844	0.922761	0.935974	0.894471	0.855506	0.881291	0.936765	0.842566	0.915628	0.974063	0.77799	0.791214	0.898031	0.915611	0.863019	0.931752	0.877872	0.907955	0.851136	0.902524	0.870892	1	0.900799
1.105	0.89766	0.848615	0.842715	0.963277	1	0.932247	0.876678	0.867768	0.810648	1	0.956174	0.943634	0.834499	1	0.903575	0.991993	0.940124	0.978782	0.919504	0.874492	0.932639	0.924024	1	0.892447	0.870451	0.766333	0.847619	1	0.959744	0.892271	0.967231	0.88199	0.892989	0.863656	0.939575	0.894436	0.945847	0.905594
1.17	0.897819	0.942966	0.770738	1	0.96218	1	0.821197	0.83642	0.942525	0.959232	0.869515	0.876822	0.930604	0.981019	0.930841	1	1	1	0.956001	0.948875	0.912347	0.91398	0.792796	0.899401	0.822994	0.872498	0.870852	0.949084	0.941413	0.904881	1	0.995613	1	0.876013	0.933981	0.945777	0.919922	0.959867
1.235	0.918057	0.833909	0.772812	0.875892	0.883153	0.960661	0.911103	0.845252	0.956862	0.900919	0.818201	0.807417	0.820365	0.97527	0.927993	0.959211	0.968919	0.980623	0.979434	0.980332	0.961479	0.909825	0.922877	0.850723	0.793411	0.884286	0.862292	0.882325	0.876939	0.902653	0.989314	0.97039	0.974123	0.882508	0.915432	0.871563	0.912529	0.982036
1.3	0.916583	0.864107	0.85361	0.913692	0.980871	0.920656	0.885364	0.92408	0.976644	0.86671	0.866076	0.869394	0.811162	0.940642	0.950546	0.884842	0.925713	0.879895	0.887138	1	1	0.884572	0.843546	0.815952	0.875618	0.821806	0.894606	0.878254	0.958915	0.920756	0.934602	0.943089	0.981899	0.873814	0.886227	0.834817	0.885111	1
1.365	0.886177	0.938101	0.803808	0.887755	0.96787	0.937127	0.905101	0.913085	1	0.867054	0.904449	0.894355	0.778948	0.913292	0.98818	0.896504	0.909847	0.857686	0	0.970548	0.929008	0.849412	0.812153	0.920264	0.780882	0.861121	0.986064	0.880311	0.938995	0.870822	0.926121	0.934639	0.992451	0.884636	0.927441	0.903055	0.847004	0.99238
1.43	0.966734	0.916545	0.828771	0.906047	0.922136	0.920075	0.798015	0.919963	0.9792	0.927817	1	0.784743	0.754256	0.886072	0.944187	0.983631	0.860841	0.897307	0	0.906212	0.89914	0.889795	0.817553	0.920264	0.832469	0.856432	1	0.877725	1	0.934628	0.853059	0.89588	0.972574	0.878169	0.950708	1	0.839529	0.940091
1.495	1	0.84184	0.826759	0.948359	0.903464	0.905152	0.779211	0.927208	0.95382	0.931796	0.987911	0.901617	0.806958	0.786686	1	0.890857	0.866032	0.880051	0	0.878664	0.951773	0.860977	0.902739	0.934172	0.881181	0.894408	0.959374	0.862203	0.848765	0.872079	0.816308	1	0.973368	0.824117	0.91786	0.893672	0.873273	0.876665
1.56	0.874116	0.926854	0.839321	0.949479	0.912073	0.899391	0.82189	0.873283	0.946623	0.908609	0.957331	0.918038	0.802232	0	0	0.878513	0.839144	0.783216	0	0.869567	0.908187	0.840199	0.860952	0.857681	0.828909	0.876493	0.896766	0.94329	0.906516	0.885759	0.865826	0.874289	0.916832	0.926951	1	0.905357	0.8628	0.914731
1.625	0.945291	0.88217	0.85293	0.937653	0.817537	0.844245	0.829801	0.855153	0.906551	0.861105	0.947064	0.915515	0.768611	0	0	0.876081	0.875874	0.859698	0	0.86643	0.935863	0.877565	0.841613	0.851729	0.837297	0.732093	0.819734	0.845238	0.970388	1	0.819185	0.83795	0.966164	1	0	0.853737	0.87476	0.880816
1.69	0.944186	0.827237	0.78765	0.951887	0.826563	0.857076	0.786359	0.920254	0.883631	0.794338	0.893496	0.88458	0.815687	0	0	0.809485	0.829584	0.93769	0	0.812967	0.930803	0.825074	0.838812	0.966875	0.769183	0.884412	0.902492	0.929028	0.970896	0.992853	0.866379	0.863977	0.932697	0.952526	0	0.884978	0.869178	0.778901
1.755	0.861172	0.809197	0.775986	0.822631	0.936386	0.854953	0.878246	0.822046	0.918887	0.800917	0.964359	0.841096	0.85297	0	0	0.811776	0.891362	0.863819	0	0.775378	0.881034	0.806004	0.921464	0.986101	0.734448	0.895353	0.924471	0.851589	0.991404	0.817044	0.885654	0.836319	0.875844	0.903312	0	0.85698	0.839521	0.834253
1.82	0.937161	0.834154	0.816395	0.858296	0	0.80463	0.80655	0.849136	0.875695	0.762733	0.95306	0	0.835912	0	0	0.801066	0.861918	0.869737	0	0.810245	0.920058	0.822634	0.909556	0.901866	0.69234	0.925235	0.956749	0.945527	0.905214	0.813901	0.931607	0.809401	0.874072	0.872859	0	0.99177	0.879092	0.736196
1.885	0	0.887812	0.802692	0.869204	0	0.783525	0	0.982781	0.919072	0.756111	0.861325	0	0.847214	0	0	0.848853	0.84376	0.89643	0	0.836189	0.804491	0	0.934509	0.97672	0.737253	0.883355	0.879865	0.9886	0.8262	0	0.837613	0.830747	0.803605	0.824502	0	0.947273	0.855666	0.842904
1.95	0	0.821054	0.751214	0.904311	0	0.7831	0	0.877153	0	0.774394	0	0	0.772234	0	0	0.843422	0.812781	0.875881	0	0	0.827662	0	0	0.983815	0.742577	0.829694	0.857405	0.960945	0	0	0	0.773353	0.868518	0.899505	0	0.934844	0.791743	0.870823
2.015	0	0.816349	0.784471	0.884954	0	0.764998	0	0	0	0.797641	0	0	0	0	0	0	0.746126	0.864527	0	0	0	0	0	0.94894	0.7269	0.847075	0.923744	0.940681	0	0	0	0.818659	0.918049	0.863345	0	0.842725	0	0.761866
2.08	0	0.793395	0	0	0	0.730688	0	0	0	0	0	0	0	0	0	0	0	0.921719	0	0	0	0	0	0.912311	0	1	0.894145	0.872248	0	0	0	0.824452	0	0	0	0.862768	0	0
2.145	0	0.81381	0	0	0	0	0	0	0	0	0	0	0	0	0	0	0	0	0	0	0	0	0	0.896954	0	0.98264	0.884796	0.901335	0	0	0	0.836647	0	0	0	0	0	0
2.21	0	0.872446	0	0	0	0	0	0	0	0	0	0	0	0	0	0	0	0	0	0	0	0	0	0.950602	0	0.826403	0.815507	0	0	0	0	0.786449	0	0	0	0	0	0
2.275	0	0	0	0	0	0	0	0	0	0	0	0	0	0	0	0	0	0	0	0	0	0	0	1	0	0.798389	0.894742	0	0	0	0	0	0	0	0	0	0	0
2.34	0	0	0	0	0	0	0	0	0	0	0	0	0	0	0	0	0	0	0	0	0	0	0	0.936826	0	0	0.928175	0	0	0	0	0	0	0	0	0	0	0
2.405	0	0	0	0	0	0	0	0	0	0	0	0	0	0	0	0	0	0	0	0	0	0	0	0	0	0	0.855415	0	0	0	0	0	0	0	0	0	0	0
2.47	0	0	0	0	0	0	0	0	0	0	0	0	0	0	0	0	0	0	0	0	0	0	0	0	0	0	0.800647	0	0	0	0	0	0	0	0	0	0	0
2.535	0	0	0	0	0	0	0	0	0	0	0	0	0	0	0	0	0	0	0	0	0	0	0	0	0	0	0.816518	0	0	0	0	0	0	0	0	0	0	0
2.6	0	0	0	0	0	0	0	0	0	0	0	0	0	0	0	0	0	0	0	0	0	0	0	0	0	0	0.800712	0	0	0	0	0	0	0	0	0	0	0
2.665	0	0	0	0	0	0	0	0	0	0	0	0	0	0	0	0	0	0	0	0	0	0	0	0	0	0	0.80045	0	0	0	0	0	0	0	0	0	0	0
0	0.170114	0.0871947	0.218349	0.0808323	0.132167	0.128615	0.128356	0.131689	0.158642	0.148422	0.127331	0.131346	0.13404	0.278582	0.103931	0.10316	0.120658	0.188645	0.147631	0.111769	0.0972633	0.17356	0.105654	0.136055	0.279619	0.0998777	0.164236	0.126113	0.118756	0.0983239	0.102448	0.131311	0.0880008	0.116494	0.141714	0.0800397	0.0864728	0.136167
0.065	0.189796	0.0965403	0.247217	0.0931641	0.145667	0.141981	0.133627	0.129685	0.1866	0.178096	0.140467	0.165803	0.139084	0.312797	0.111219	0.110238	0.140598	0.200713	0.164147	0.120413	0.111838	0.189284	0.107707	0.154378	0.326653	0.101688	0.185105	0.124221	0.120224	0.108717	0.117565	0.149988	0.0863231	0.128237	0.174602	0.0911209	0.0862664	0.142817
0.13	0.215076	0.104087	0.281051	0.0973226	0.167548	0.159896	0.137555	0.131971	0.216814	0.197047	0.156604	0.209604	0.161092	0.357965	0.120871	0.123926	0.161813	0.231784	0.175218	0.140048	0.12326	0.220405	0.116954	0.184994	0.395911	0.110878	0.197915	0.132569	0.134672	0.125795	0.129628	0.162866	0.0902001	0.140936	0.200625	0.102452	0.0906274	0.144164
0.195	0.255675	0.119089	0.314715	0.106911	0.195738	0.180022	0.147532	0.134668	0.253186	0.216685	0.19261	0.274473	0.193063	0.411636	0.138244	0.133362	0.185657	0.270704	0.196539	0.160028	0.140902	0.242359	0.135488	0.20867	0.462115	0.123785	0.202501	0.143707	0.148284	0.139542	0.147475	0.183962	0.0929188	0.154393	0.230189	0.112327	0.095212	0.151747
0.26	0.304216	0.130003	0.353412	0.117499	0.250243	0.217446	0.153534	0.142556	0.2949	0.237911	0.226551	0.363281	0.216858	0.467413	0.158061	0.143159	0.214716	0.323535	0.238291	0.195257	0.169973	0.272893	0.176379	0.246147	0.538788	0.138047	0.194959	0.154544	0.182539	0.160724	0.174898	0.220571	0.101752	0.172319	0.261385	0.127194	0.101523	0.165219
0.325	0.358966	0.161212	0.383621	0.137992	0.33141	0.260516	0.184889	0.141069	0.342745	0.250184	0.282485	0.481243	0.250514	0.532065	0.186668	0.154649	0.275043	0.38585	0.30427	0.249241	0.217261	0.314978	0.233624	0.303376	0.620144	0.157784	0.186637	0.17678	0.239533	0.185872	0.20983	0.277161	0.112135	0.197596	0.309662	0.154214	0.103315	0.184439
0.39	0.450494	0.194091	0.42922	0.17968	0.443117	0.332354	0.202875	0.145574	0.421008	0.280474	0.349954	0.626648	0.284438	0.637811	0.214966	0.174456	0.369966	0.448123	0.414346	0.325238	0.294832	0.378235	0.343973	0.352054	0.721158	0.204705	0.192165	0.229294	0.317771	0.216488	0.260067	0.380352	0.124936	0.229044	0.380611	0.20369	0.113914	0.230961
0.455	0.556109	0.26255	0.476757	0.24951	0.576723	0.428103	0.24008	0.144167	0.519066	0.31498	0.439861	0.772455	0.340881	0.745015	0.26654	0.215732	0.496336	0.521275	0.550315	0.427089	0.392148	0.474598	0.490367	0.422252	0.830583	0.268482	0.219502	0.295504	0.427097	0.246914	0.343031	0.510636	0.169499	0.256362	0.488222	0.281643	0.132061	0.301491
0.52	0.67493	0.365856	0.531454	0.362558	0.721116	0.555463	0.295746	0.156418	0.63321	0.349558	0.537832	0.897605	0.411339	0.872532	0.341799	0.282623	0.657112	0.606849	0.710148	0.565474	0.536017	0.591313	0.663291	0.52356	0.91589	0.362095	0.251771	0.383796	0.553367	0.295529	0.460218	0.666581	0.237719	0.304955	0.598466	0.389348	0.156054	0.415917
0.585	0.796801	0.484452	0.592243	0.485731	0.834197	0.655148	0.389359	0.169	0.762649	0.411844	0.635056	0.973557	0.516249	0.917251	0.456723	0.395737	0.791564	0.683176	0.866681	0.701693	0.699248	0.710949	0.822292	0.631182	0.967812	0.461617	0.312134	0.49499	0.657064	0.347016	0.597528	0.764794	0.353245	0.35878	0.716097	0.510156	0.194786	0.548058
0.65	0.924752	0.619681	0.65502	0.661213	0.918064	0.759944	0.525574	0.199556	0.856678	0.480699	0.741474	1	0.63551	0.985276	0.618087	0.536695	0.895121	0.764219	0.979425	0.80305	0.850814	0.823389	0.935834	0.746992	1	0.582724	0.366697	0.616997	0.733042	0.41606	0.725583	0.852895	0.515662	0.434015	0.831659	0.635091	0.266831	0.688087
0.715	0.976613	0.773725	0.760772	0.8147	0.971573	0.850557	0.688873	0.256928	0.952383	0.583918	0.82528	0.956082	0.77261	1	0.787278	0.676216	0.965687	0.859597	1	0.89626	0.953529	0.902821	0.996431	0.866726	0.978257	0.677152	0.449834	0.761914	0.788474	0.514662	0.836504	0.909258	0.688254	0.538	0.923933	0.752683	0.398955	0.798646
0.78	1	0.895026	0.843148	0.922012	1	0.922832	0.837636	0.348891	0.993085	0.709759	0.891592	0.847997	0.886735	0.968781	0.913078	0.829214	1	0.933586	0.933203	0.973231	1	0.966642	1	0.948359	0.93429	0.760086	0.549551	0.871936	0.815521	0.629317	0.915502	0.954605	0.837612	0.658483	1	0.832848	0.558572	0.894339
0.845	0.998539	0.983207	0.919583	1	0.991609	0.958865	0.946479	0.482015	1	0.839616	0.963608	0.725574	0.971781	0.908782	1	0.932443	0.985095	0.971435	0.805931	1	0.997362	0.996146	0.917559	1	0.874591	0.809678	0.666854	0.955903	0.875924	0.741269	0.943901	1	0.949768	0.793178	0.982125	0.880622	0.744443	0.959853
0.91	0.942742	1	0.98153	0.998915	0.972272	0.986747	1	0.632535	0.972715	0.951747	0.998761	0.617844	1	0.851875	0.972719	1	0.937832	1	0.675617	0.999001	0.946355	1	0.819103	0.95101	0.800593	0.85892	0.768274	1	0.930461	0.867237	0.984397	0.999979	1	0.922516	0.941134	0.934898	0.87652	1
0.975	0.841287	0.935669	1	0.920879	0.91532	1	0.981012	0.813664	0.896294	1	1	0.528442	0.999743	0.765925	0.893583	0.983578	0.844338	0.99093	0.547734	0.973687	0.846715	0.989319	0.682729	0.898251	0.71401	0.914583	0.868442	0.966863	0.975337	0.960414	1	0.98793	0.963157	0.997025	0.875779	0.984633	0.985014	0.978021
1.04	0.739891	0.842696	0.965814	0.826107	0.815149	0.981879	0.901121	0.933702	0.800943	0.992334	0.947422	0.453089	0.928024	0.713876	0.758022	0.926311	0.696299	0.948081	0.45343	0.876822	0.716667	0.925607	0.549111	0.787509	0.617534	0.966789	0.937377	0.884599	1	0.997067	0.98543	0.925332	0.886985	1	0.769542	1	1	0.930378
1.105	0.611916	0.70305	0.90138	0.709289	0.70237	0.939446	0.829106	1	0.692482	0.921266	0.902686	0.390552	0.814695	0.643053	0.573939	0.816924	0.560765	0.875999	0.393657	0.777611	0.591493	0.834187	0.436916	0.660628	0.546562	1	0.973592	0.783606	0.970074	1	0.922652	0.83107	0.77471	0.936244	0.68661	0.973273	0.922903	0.855804
1.17	0.495122	0.543243	0.807615	0.584676	0.613679	0.869648	0.741016	0.975005	0.578916	0.807726	0.812564	0.343486	0.676946	0.579903	0.422427	0.698486	0.45236	0.776601	0.362794	0.653774	0.463078	0.740777	0.378591	0.544715	0.486692	0.991663	1	0.700487	0.898075	0.96742	0.818638	0.721998	0.633327	0.834909	0.609902	0.898589	0.781273	0.737327
1.235	0.397776	0.416641	0.72403	0.488197	0.535751	0.764081	0.639815	0.87728	0.506	0.662562	0.719235	0.303229	0.518466	0.551491	0.306872	0.562082	0.367676	0.67121	0.334664	0.565718	0.378147	0.654473	0.337556	0.421395	0.434525	0.932958	0.986332	0.641205	0.773314	0.87924	0.696768	0.604674	0.502221	0.711504	0.556509	0.779578	0.622242	0.618537
1.3	0.343817	0.307088	0.619921	0.405334	0.485027	0.662424	0.575248	0.767061	0.45585	0.532372	0.635688	0.273638	0.37594	0.505653	0.226906	0.45488	0.322335	0.560591	0.319561	0.485392	0.339622	0.588656	0.313365	0.340671	0.42832	0.845077	0.952951	0.578333	0.677593	0.759323	0.571098	0.513472	0.393948	0.587638	0.514155	0.659839	0.470791	0.530399
1.365	0.306132	0.243088	0.545713	0.338552	0.455423	0.555585	0.5179	0.620703	0.41197	0.424052	0.558125	0.244929	0.280781	0.482313	0.183195	0.378779	0.291756	0.481139	0	0.426429	0.294845	0.529885	0.293808	0.267381	0.399897	0.72187	0.886402	0.510152	0.608435	0.619855	0.473293	0.433683	0.333536	0.481755	0.488688	0.545643	0.345628	0.476811
1.43	0.283354	0.198763	0.472806	0.282468	0.428463	0.4554	0.483121	0.499943	0.36131	0.339955	0.503971	0.227028	0.205198	0.450216	0.16414	0.326866	0.262856	0.429	0	0.367464	0.260553	0.488568	0.280756	0.20906	0.379956	0.64171	0.824122	0.480374	0.554948	0.492641	0.413171	0.375095	0.283749	0.434888	0.480038	0.444125	0.266342	0.42367
1.495	0.266685	0.178826	0.3983	0.249015	0.411445	0.378729	0.45548	0.398821	0.347923	0.289496	0.446504	0.193044	0.168025	0.43572	0.157112	0.296656	0.242796	0.373024	0	0.331008	0.244236	0.457134	0.266329	0.162773	0.368586	0.582858	0.766737	0.435193	0.516796	0.389595	0.378282	0.332187	0.262166	0.376683	0.449783	0.366157	0.216655	0.382655
1.56	0.245841	0.156294	0.350847	0.232539	0.394525	0.326974	0.449171	0.339683	0.324102	0.257627	0.401818	0.174636	0.143316	0	0	0.27324	0.224958	0.330117	0	0.291594	0.227514	0.423505	0.269595	0.091057	0.347044	0.538782	0.694407	0.411587	0.488957	0.304138	0.354148	0.288873	0.262394	0.335992	0.444444	0.320248	0.184364	0.358386
1.625	0.239388	0.147053	0.31406	0.216757	0.38383	0.288518	0.438382	0.284516	0.296225	0.237592	0.377036	0.160395	0.125925	0	0	0.256692	0.212254	0.305613	0	0.277062	0.21382	0.391836	0.270197	0.0880881	0.336478	0.505102	0.650591	0.381553	0.463681	0.236035	0.337463	0.285798	0.253388	0.305004	0	0.287744	0.160863	0.339582
1.69	0.241419	0.139716	0.287463	0.206823	0.372357	0.260646	0.424595	0.243797	0.279905	0.218962	0.347289	0.144698	0.111827	0	0	0.241062	0.199492	0.271864	0	0.262733	0.208863	0.364639	0.260604	0.208352	0.325342	0.480108	0.606171	0.350277	0.437242	0.186371	0.328515	0.275586	0.252473	0.282168	0	0.261277	0.148707	0.313398
1.755	0.234722	0.13175	0.258191	0.202898	0.353888	0.239314	0.41283	0.219241	0.270099	0.19958	0.304939	0.135182	0.101776	0	0	0.230948	0.185174	0.253922	0	0.25119	0.200387	0.342355	0.307115	0.191025	0.317152	0.452387	0.569614	0.3335	0.430301	0.154515	0.304192	0.270543	0.247718	0.264986	0	0.237758	0.144113	0.278373
1.82	0.228213	0.122112	0.247248	0.203077	0	0.214287	0.415995	0.20447	0.260431	0.186767	0.277448	0	0.0977379	0	0	0.229954	0.173655	0.232802	0	0.240478	0.198323	0.311312	0.29548	0.178381	0.303064	0.438128	0.53371	0.303896	0.416448	0.128177	0.285111	0.275155	0.252671	0.249676	0	0.215129	0.139855	0.277519
1.885	0	0.115554	0.234265	0.19587	0	0.204543	0	0.186908	0.249746	0.175631	0.255388	0	0.0913649	0	0	0.214985	0.160313	0.225954	0	0.23088	0.413923	0	0.289001	0.172186	0.460641	0.427376	0.506727	0.295527	0.412046	0	0.262448	0.266611	0.248857	0.234496	0	0.199477	0.13923	0.256949
1.95	0	0.113621	0.233911	0.203318	0	0.193805	0	0.177932	0	0.168946	0	0	0.0850206	0	0	0.208956	0.145445	0.216639	0	0	0.394016	0	0	0.162256	0.416628	0.415001	0.472777	0.280972	0	0	0	0.260622	0.250135	0.228843	0	0.181614	0.132268	0.25412
2.015	0	0.117956	0.234066	0.194053	0	0.185795	0	0	0	0.15845	0	0	0	0	0	0	0.131513	0.200896	0	0	0	0	0	0.157111	0.384893	0.402936	0.450306	0.264365	0	0	0	0.263623	0.245556	0.230307	0	0.168747	0	0.231745
2.08	0	0.11285	0	0	0	0.181604	0	0	0	0	0	0	0	0	0	0	0	0.188918	0	0	0	0	0	0.148051	0	0.397703	0.418843	0.260102	0	0	0	0.260148	0	0	0	0.155131	0	0
2.145	0	0.109417	0	0	0	0	0	0	0	0	0	0	0	0	0	0	0	0	0	0	0	0	0	0.137946	0	0.381864	0.399815	0.247898	0	0	0	0.259436	0	0	0	0	0	0
2.21	0	0.109376	0	0	0	0	0	0	0	0	0	0	0	0	0	0	0	0	0	0	0	0	0	0.136917	0	0.371831	0.391687	0	0	0	0	0.25496	0	0	0	0	0	0
2.275	0	0	0	0	0	0	0	0	0	0	0	0	0	0	0	0	0	0	0	0	0	0	0	0.131468	0	0.3753	0.374124	0	0	0	0	0	0	0	0	0	0	0
2.34	0	0	0	0	0	0	0	0	0	0	0	0	0	0	0	0	0	0	0	0	0	0	0	0.12723	0	0	0.3548	0	0	0	0	0	0	0	0	0	0	0
2.405	0	0	0	0	0	0	0	0	0	0	0	0	0	0	0	0	0	0	0	0	0	0	0	0	0	0	0.342034	0	0	0	0	0	0	0	0	0	0	0
2.47	0	0	0	0	0	0	0	0	0	0	0	0	0	0	0	0	0	0	0	0	0	0	0	0	0	0	0.333788	0	0	0	0	0	0	0	0	0	0	0
2.535	0	0	0	0	0	0	0	0	0	0	0	0	0	0	0	0	0	0	0	0	0	0	0	0	0	0	0.32514	0	0	0	0	0	0	0	0	0	0	0
2.6	0	0	0	0	0	0	0	0	0	0	0	0	0	0	0	0	0	0	0	0	0	0	0	0	0	0	0.315875	0	0	0	0	0	0	0	0	0	0	0
2.665	0	0	0	0	0	0	0	0	0	0	0	0	0	0	0	0	0	0	0	0	0	0	0	0	0	0	0.316222	0	0	0	0	0	0	0	0	0	0	0

## Sheet: Nup82_centered
																																									Mittwert	SD	Anzahl
																												0.164236													0.164236	0	1
									0.131689																		0.0998777	0.185105			0.0983239										0.128749	0.0351562	4
									0.129685																		0.101688	0.197915		0.118756	0.108717				0.116494		0.0800397	0.0864728			0.117471	0.0341151	8
				0.218349			0.128615		0.131971		0.148422	0.127331															0.110878	0.202501		0.120224	0.125795	0.102448			0.128237		0.0911209	0.0862664			0.132474	0.0372105	13
	0		0.0871947	0.247217			0.141981	0.128356	0.134668		0.178096	0.140467		0.13404			0.10316		0.188645				0.17356				0.123785	0.194959	0.126113	0.134672	0.139542	0.117565		0.0880008	0.140936		0.102452	0.0906274	0.136167		0.138737	0.0377364	22
	0.065		0.0965403	0.281051	0.0808323		0.159896	0.133627	0.142556	0.158642	0.197047	0.156604		0.139084		0.103931	0.110238		0.200713		0.111769		0.189284		0.136055		0.138047	0.186637	0.124221	0.148284	0.160724	0.129628	0.131311	0.0863231	0.154393		0.112327	0.095212	0.142817		0.143136	0.0411541	28
	0.13	0.170114	0.104087	0.314715	0.0931641	0.132167	0.180022	0.137555	0.141069	0.1866	0.216685	0.19261		0.161092		0.111219	0.123926	0.120658	0.231784		0.120413	0.0972633	0.220405	0.105654	0.154378		0.157784	0.192165	0.132569	0.182539	0.185872	0.147475	0.149988	0.0902001	0.172319	0.141714	0.127194	0.101523	0.144164		0.15415	0.0464446	34
	0.195	0.189796	0.119089	0.353412	0.0973226	0.145667	0.217446	0.147532	0.145574	0.216814	0.237911	0.226551		0.193063	0.278582	0.120871	0.133362	0.140598	0.270704	0.147631	0.140048	0.111838	0.242359	0.107707	0.184994		0.204705	0.219502	0.143707	0.239533	0.216488	0.174898	0.162866	0.0929188	0.197596	0.174602	0.154214	0.103315	0.151747		0.177916	0.0572452	36
	0.26	0.215076	0.130003	0.383621	0.106911	0.167548	0.260516	0.153534	0.144167	0.253186	0.250184	0.282485	0.131346	0.216858	0.312797	0.138244	0.143159	0.161813	0.323535	0.164147	0.160028	0.12326	0.272893	0.116954	0.20867	0.279619	0.268482	0.251771	0.154544	0.317771	0.246914	0.20983	0.183962	0.101752	0.229044	0.200625	0.20369	0.113914	0.165219		0.203897	0.069386	38
	0.325	0.255675	0.161212	0.42922	0.117499	0.195738	0.332354	0.184889	0.156418	0.2949	0.280474	0.349954	0.165803	0.250514	0.357965	0.158061	0.154649	0.185657	0.38585	0.175218	0.195257	0.140902	0.314978	0.135488	0.246147	0.326653	0.362095	0.312134	0.17678	0.427097	0.295529	0.260067	0.220571	0.112135	0.256362	0.230189	0.281643	0.132061	0.184439		0.242173	0.0871123	38
	0.39	0.304216	0.194091	0.476757	0.137992	0.250243	0.428103	0.202875	0.169	0.342745	0.31498	0.439861	0.209604	0.284438	0.411636	0.186668	0.174456	0.214716	0.448123	0.196539	0.249241	0.169973	0.378235	0.176379	0.303376	0.395911	0.461617	0.366697	0.229294	0.553367	0.347016	0.343031	0.277161	0.124936	0.304955	0.261385	0.389348	0.156054	0.230961		0.292263	0.107974	38
	0.455	0.358966	0.26255	0.531454	0.17968	0.33141	0.555463	0.24008	0.199556	0.421008	0.349558	0.537832	0.274473	0.340881	0.467413	0.214966	0.215732	0.275043	0.521275	0.238291	0.325238	0.217261	0.474598	0.233624	0.352054	0.462115	0.582724	0.449834	0.295504	0.657064	0.41606	0.460218	0.380352	0.169499	0.35878	0.309662	0.510156	0.194786	0.301491		0.359649	0.126913	38
	0.52	0.450494	0.365856	0.592243	0.24951	0.443117	0.655148	0.295746	0.256928	0.519066	0.411844	0.635056	0.363281	0.411339	0.532065	0.26654	0.282623	0.369966	0.606849	0.30427	0.427089	0.294832	0.591313	0.343973	0.422252	0.538788	0.677152	0.549551	0.383796	0.733042	0.514662	0.597528	0.510636	0.237719	0.434015	0.380611	0.635091	0.266831	0.415917		0.446493	0.135684	38
	0.585	0.556109	0.484452	0.65502	0.362558	0.576723	0.759944	0.389359	0.348891	0.63321	0.480699	0.741474	0.481243	0.516249	0.637811	0.341799	0.395737	0.496336	0.683176	0.414346	0.565474	0.392148	0.710949	0.490367	0.52356	0.620144	0.760086	0.666854	0.49499	0.788474	0.629317	0.725583	0.666581	0.353245	0.538	0.488222	0.752683	0.398955	0.548058		0.554443	0.1322	38
	0.65	0.67493	0.619681	0.760772	0.485731	0.721116	0.850557	0.525574	0.482015	0.762649	0.583918	0.82528	0.626648	0.63551	0.745015	0.456723	0.536695	0.657112	0.764219	0.550315	0.701693	0.536017	0.823389	0.663291	0.631182	0.721158	0.809678	0.768274	0.616997	0.815521	0.741269	0.836504	0.764794	0.515662	0.658483	0.598466	0.832848	0.558572	0.688087		0.672272	0.112545	38
	0.715	0.796801	0.773725	0.843148	0.661213	0.834197	0.922832	0.688873	0.632535	0.856678	0.709759	0.891592	0.772455	0.77261	0.872532	0.618087	0.676216	0.791564	0.859597	0.710148	0.80305	0.699248	0.902821	0.822292	0.746992	0.830583	0.85892	0.868442	0.761914	0.875924	0.867237	0.915502	0.852895	0.688254	0.793178	0.716097	0.880622	0.744443	0.798646		0.792411	0.0816087	38
	0.78	0.924752	0.895026	0.919583	0.8147	0.918064	0.958865	0.837636	0.813664	0.952383	0.839616	0.963608	0.897605	0.886735	0.917251	0.787278	0.829214	0.895121	0.933586	0.866681	0.89626	0.850814	0.966642	0.935834	0.866726	0.91589	0.914583	0.937377	0.871936	0.930461	0.960414	0.943901	0.909258	0.837612	0.922516	0.831659	0.934898	0.87652	0.894339		0.896027	0.0467645	38
	0.845	0.976613	0.983207	0.98153	0.922012	0.971573	0.986747	0.946479	0.933702	0.993085	0.951747	0.998761	0.973557	0.971781	0.985276	0.913078	0.932443	0.965687	0.971435	0.979425	0.973231	0.953529	0.996146	0.996431	0.948359	0.967812	0.966789	0.973592	0.955903	0.975337	0.997067	0.984397	0.954605	0.949768	0.997025	0.923933	0.984633	0.985014	0.959853		0.967936	0.0221937	38
	0.91	1	1	1	1	1	1	1	1	1	1	1	1	1	1	1	1	1	1	1	1	1	1	1	1	1	1	1	1	1	1	1	1	1	1	1	1	1	1		1	0	38
	0.975	0.998539	0.935669	0.965814	0.998915	0.991609	0.981879	0.981012	0.975005	0.972715	0.992334	0.947422	0.956082	0.999743	0.968781	0.972719	0.983578	0.985095	0.99093	0.933203	0.999001	0.997362	0.989319	0.917559	0.95101	0.978257	0.991663	0.986332	0.966863	0.970074	0.96742	0.98543	0.999979	0.963157	0.936244	0.982125	0.973273	0.922903	0.978021		0.973343	0.0218496	38
	1.04	0.942742	0.842696	0.90138	0.920879	0.972272	0.939446	0.901121	0.87728	0.896294	0.921266	0.902686	0.847997	0.928024	0.908782	0.893583	0.926311	0.937832	0.948081	0.805931	0.973687	0.946355	0.925607	0.819103	0.898251	0.93429	0.932958	0.952951	0.884599	0.898075	0.87924	0.922652	0.98793	0.886985	0.834909	0.941134	0.898589	0.781273	0.930378		0.90641	0.0454604	38
	1.105	0.841287	0.70305	0.807615	0.826107	0.91532	0.869648	0.829106	0.767061	0.800943	0.807726	0.812564	0.725574	0.814695	0.851875	0.758022	0.816924	0.844338	0.875999	0.675617	0.876822	0.846715	0.834187	0.682729	0.787509	0.874591	0.845077	0.886402	0.783606	0.773314	0.759323	0.818638	0.925332	0.77471	0.711504	0.875779	0.779578	0.622242	0.855804		0.806772	0.0669573	38
	1.17	0.739891	0.543243	0.72403	0.709289	0.815149	0.764081	0.741016	0.620703	0.692482	0.662562	0.719235	0.617844	0.676946	0.765925	0.573939	0.698486	0.696299	0.776601	0.547734	0.777611	0.716667	0.740777	0.549111	0.660628	0.800593	0.72187	0.824122	0.700487	0.677593	0.619855	0.696768	0.83107	0.633327	0.587638	0.769542	0.659839	0.470791	0.737327		0.691081	0.0838868	38
	1.235	0.611916	0.416641	0.619921	0.584676	0.70237	0.662424	0.639815	0.499943	0.578916	0.532372	0.635688	0.528442	0.518466	0.713876	0.422427	0.562082	0.560765	0.67121	0.45343	0.653774	0.591493	0.654473	0.436916	0.544715	0.71401	0.64171	0.766737	0.641205	0.608435	0.492641	0.571098	0.721998	0.502221	0.481755	0.68661	0.545643	0.345628	0.618537		0.582499	0.0955599	38
	1.3	0.495122	0.307088	0.545713	0.488197	0.613679	0.555585	0.575248	0.398821	0.506	0.424052	0.558125	0.453089	0.37594	0.643053	0.306872	0.45488	0.45236	0.560591	0.393657	0.565718	0.463078	0.588656	0.378591	0.421395	0.617534	0.582858	0.694407	0.578333	0.554948	0.389595	0.473293	0.604674	0.393948	0.434888	0.609902	0.444125	0.266342	0.530399		0.492125	0.100656	38
	1.365	0.397776	0.243088	0.472806	0.405334	0.535751	0.4554	0.5179	0.339683	0.45585	0.339955	0.503971	0.390552	0.280781	0.579903	0.226906	0.378779	0.367676	0.481139	0.362794	0.485392	0.378147	0.529885	0.337556	0.340671	0.546562	0.538782	0.650591	0.510152	0.516796	0.304138	0.413171	0.513472	0.333536	0.376683	0.556509	0.366157	0.216655	0.476811		0.424413	0.103071	38
	1.43	0.343817	0.198763	0.3983	0.338552	0.485027	0.378729	0.483121	0.284516	0.41197	0.289496	0.446504	0.343486	0.205198	0.551491	0.183195	0.326866	0.322335	0.429	0.334664	0.426429	0.339622	0.488568	0.313365	0.267381	0.486692	0.505102	0.606171	0.480374	0.488957	0.236035	0.378282	0.433683	0.283749	0.335992	0.514155	0.320248	0.184364	0.42367		0.37547	0.105116	38
	1.495	0.306132	0.178826	0.350847	0.282468	0.455423	0.326974	0.45548	0.243797	0.36131	0.257627	0.401818	0.303229	0.168025	0.505653	0.16414	0.296656	0.291756	0.373024	0.319561	0.367464	0.294845	0.457134	0.293808	0.20906	0.434525	0.480108	0.569614	0.435193	0.463681	0.186371	0.354148	0.375095	0.262166	0.305004	0.488688	0.287744	0.160863	0.382655		0.338182	0.103248	38
	1.56	0.283354	0.156294	0.31406	0.249015	0.428463	0.288518	0.449171	0.219241	0.347923	0.237592	0.377036	0.273638	0.143316	0.482313	0.157112	0.27324	0.262856	0.330117		0.331008	0.260553	0.423505	0.280756	0.162773	0.42832	0.452387	0.53371	0.411587	0.437242	0.154515	0.337463	0.332187	0.262394	0.282168	0.480038	0.261277	0.148707	0.358386		0.313844	0.104518	37
	1.625	0.266685	0.147053	0.287463	0.232539	0.411445	0.260646	0.438382	0.20447	0.324102	0.218962	0.347289	0.244929	0.125925	0.450216		0.256692	0.242796	0.305613		0.291594	0.244236	0.391836	0.266329	0.091057	0.399897	0.438128	0.506727	0.381553	0.430301	0.128177	0.328515	0.288873	0.253388	0.264986	0.449783	0.237758	0.144113	0.339582		0.295612	0.102617	36
	1.69	0.245841	0.139716	0.258191	0.216757	0.394525	0.239314	0.424595	0.186908	0.296225	0.19958	0.304939	0.227028	0.111827	0.43572		0.241062	0.224958	0.271864		0.277062	0.227514	0.364639	0.269595	0.0880881	0.379956	0.427376	0.472777	0.350277	0.416448		0.304192	0.285798	0.252473	0.249676	0.444444	0.215129	0.139855	0.313398		0.282793	0.097144	35
	1.755	0.239388	0.13175	0.247248	0.206823	0.38383	0.214287	0.41283	0.177932	0.279905	0.186767	0.277448	0.193044	0.101776			0.230948	0.212254	0.253922		0.262733	0.21382	0.342355	0.270197	0.208352	0.368586	0.415001	0.450306	0.3335	0.412046		0.285111	0.275586	0.247718	0.234496		0.199477	0.13923	0.278373		0.263244	0.0849744	33
	1.82	0.241419	0.122112	0.234265	0.202898	0.372357	0.204543	0.415995		0.270099	0.175631	0.255388	0.174636	0.0977379			0.229954	0.199492	0.232802		0.25119	0.208863	0.311312	0.260604	0.191025	0.347044	0.402936	0.418843	0.303896			0.262448	0.270543	0.252671	0.228843		0.181614	0.132268	0.277519		0.249385	0.0793403	31
	1.885	0.234722	0.115554	0.233911	0.203077	0.353888	0.193805			0.260431	0.168946		0.160395	0.0913649			0.214985	0.185174	0.225954		0.240478	0.200387		0.307115	0.178381	0.336478	0.397703	0.399815	0.295527				0.275155	0.248857	0.230307		0.168747		0.256949		0.23762	0.0757125	26
	1.95	0.228213	0.113621	0.234066	0.19587		0.185795			0.249746	0.15845		0.144698	0.0850206			0.208956	0.173655	0.216639		0.23088	0.198323		0.29548	0.172186	0.325342	0.381864	0.391687	0.280972				0.266611	0.250135			0.155131		0.25412		0.224894	0.0739141	24
	2.015		0.117956		0.203318		0.181604						0.135182					0.160313	0.200896			0.413923		0.289001	0.162256	0.317152	0.371831	0.374124	0.264365				0.260622	0.245556					0.231745		0.245615	0.0862936	16
	2.08		0.11285		0.194053													0.145445	0.188918			0.394016			0.157111	0.303064	0.3753	0.3548	0.260102				0.263623								0.249935	0.0933022	11
	2.145		0.109417															0.131513							0.148051	0.460641		0.342034	0.247898				0.260148								0.242815	0.117584	7
	2.21		0.109376																						0.137946	0.416628		0.333788					0.259436								0.251435	0.115927	5
	2.275																								0.136917	0.384893		0.32514					0.25496								0.275477	0.0922741	4
	2.34																								0.131468			0.315875													0.223672	0.0922033	2
	2.405																								0.12723			0.316222													0.221726	0.0944961	2
	2.47
	2.535
	2.6
	2.665
																																									Mittwert	SD	Anzahl
																												0.681181													0.681181	0	1
									0.905641																		0.650735	0.777484			0.741908										0.768942	0.0914651	4
									0.938658																		0.687657	0.774352		0.68471	0.692131				0.714835		0.758403	0.960937			0.77646	0.104812	8
				0.684475			0.655756		0.887619		0.697827	0.685453															0.686934	0.783292		0.717275	0.700943	0.662983			0.670668		0.787034	0.782823			0.723314	0.0648208	13
	0		0.794985	0.678857			0.587164	0.690508	0.895045		0.878645	0.648254		0.78173			0.766716		0.68762				0.86344				0.727515	0.790046	0.671314	0.757309	0.734984	0.666959		0.636847	0.729695		0.833242	0.765123	0.634659		0.737303	0.0822225	22
	0.065		0.797312	0.708276	0.831334		0.640882	0.718636	0.895409	0.690539	0.826036	0.687023		0.725215		0.911623	0.689422		0.647638		0.705053		0.743216		0.704686		0.68903	0.75726	0.706995	0.77631	0.732212	0.686326	0.571654	0.607459	0.745851		0.772188	0.784456	0.571319		0.725834	0.0808428	28
	0.13	0.925137	0.815076	0.711101	0.773791	0.734935	0.645552	0.763739	0.926803	0.725137	0.860173	0.731027		0.804951		0.914701	0.700532	0.627682	0.65712		0.669064	0.687407	0.71975	0.680049	0.707004		0.717716	0.713373	0.723953	0.795696	0.769165	0.733451	0.667361	0.696789	0.78615	0.692942	0.767619	0.851481	0.601106		0.744045	0.0801803	34
	0.195	0.862923	0.872175	0.731497	0.862124	0.783178	0.611811	0.763606	0.911885	0.670054	0.833578	0.695839		0.86799	0.720649	0.870113	0.659737	0.691403	0.641379	0.651129	0.709781	0.72841	0.774753	0.625099	0.658325		0.694889	0.774936	0.757197	0.788263	0.795442	0.712357	0.631299	0.719916	0.818551	0.692683	0.77294	0.843199	0.660074		0.746089	0.0818098	36
	0.26	0.865157	0.762008	0.754751	0.842835	0.719449	0.726119	0.761178	0.971529	0.655555	0.831088	0.712854	0.640274	0.812478	0.683544	0.896296	0.663896	0.712441	0.740728	0.652057	0.733981	0.702721	0.802175	0.73945	0.730184	0.658322	0.718474	0.79423	0.759535	0.771789	0.746336	0.675771	0.659827	0.655567	0.797072	0.751039	0.820544	0.822805	0.67576		0.74789	0.0739733	38
	0.325	0.893087	0.804762	0.810687	0.84866	0.817075	0.684265	0.650052	0.946445	0.664682	0.843412	0.745837	0.75167	0.962089	0.749871	0.911026	0.71242	0.698751	0.655234	0.649781	0.726263	0.741908	0.832319	0.643602	0.658325	0.64269	0.699503	0.779028	0.749585	0.798662	0.78019	0.738598	0.68994	0.680526	0.817223	0.772521	0.807454	0.754034	0.629593		0.756362	0.0857588	38
	0.39	0.941742	0.856404	0.831245	0.830653	0.739423	0.694765	0.681205	0.938964	0.709252	0.897325	0.734538	0.734332	0.961805	0.749879	0.982422	0.757594	0.793499	0.748753	0.693189	0.769062	0.645041	0.84619	0.705429	0.672233	0.67708	0.714775	0.77353	0.752604	0.781499	0.719406	0.745136	0.58467	0.720565	0.8196	0.719607	0.862732	0.770574	0.676663		0.7693	0.0901412	38
	0.455	0.898901	0.821753	0.863766	0.828908	0.712905	0.762761	0.745721	0.909509	0.720547	0.908865	0.742856	0.762348	1	0.713694	0.919672	0.640588	0.789114	0.798963	0.743678	0.817072	0.665788	0.866958	0.64824	0.713958	0.716362	0.739386	0.792887	0.757004	0.828224	0.755877	0.750108	0.683405	0.721167	0.836581	0.773392	0.926929	0.818153	0.656006		0.782949	0.08451	38
	0.52	0.820471	0.868734	0.947553	0.851553	0.750728	0.737824	0.739031	0.949468	0.723015	0.838996	0.732484	0.777577	0.952833	0.73994	0.852272	0.704784	0.805792	0.797229	0.771241	0.856055	0.707897	0.861271	0.682997	0.702368	0.675478	0.76396	0.74399	0.803946	0.790085	0.849405	0.759238	0.654736	0.715406	0.820809	0.79123	0.883279	0.856466	0.581632		0.785836	0.0820424	38
	0.585	0.892935	0.890901	1	0.79979	0.811523	0.782861	0.773545	1	0.700212	0.79985	0.776884	0.73762	0.872796	0.724724	0.835693	0.808748	0.785863	0.793518	0.712154	0.842126	0.792103	0.896366	0.711786	0.758001	0.647766	0.724317	0.76101	0.804103	0.805368	0.855808	0.812247	0.636759	0.768237	0.851986	0.700926	0.810818	0.693748	0.665484		0.790489	0.0816484	38
	0.65	0.880809	0.884158	0.902205	0.945868	0.792074	0.797755	0.692074	0.939753	0.811757	0.855415	0.798875	0.729289	0.935405	0.779599	0.864972	0.773328	0.786855	0.776311	0.79619	0.816465	0.751246	0.896737	0.765793	0.718594	0.668185	0.790363	0.804816	0.774101	0.788895	0.825126	0.856773	0.725059	0.770007	0.896795	0.768347	0.817559	0.87668	0.747448		0.810571	0.0674261	38
	0.715	0.899952	0.809668	0.881719	0.860771	0.773133	0.809048	0.909639	0.901014	0.754054	0.895132	0.785185	0.859142	0.948747	0.774749	0.905253	0.763416	0.772446	0.853875	0.812626	0.790403	0.762599	0.959062	0.739606	0.741774	0.690773	0.770538	0.81214	0.782798	0.786916	0.914432	0.825771	0.726787	0.737816	0.894632	0.889071	0.81066	0.836509	0.745621		0.820723	0.0673882	38
	0.78	0.993271	0.953264	0.932572	0.840108	0.788919	0.841914	0.891807	0.880336	0.751314	0.961003	0.807879	0.902137	0.961663	0.812483	0.870402	0.859188	0.847427	0.873566	0.869437	0.789689	0.825928	0.964435	0.781077	0.808998	0.716534	0.749889	0.791214	0.767006	0.819838	0.903461	0.91698	0.774764	0.767367	0.812058	0.881275	0.914446	0.861721	0.801967		0.849667	0.0684637	38
	0.845	0.949669	0.817599	0.805703	0.934564	0.834986	0.792021	0.892912	0.839253	0.796941	0.935301	0.771915	0.99029	0.858219	0.812394	0.879691	0.907641	0.825873	0.8485	0.874494	0.815421	0.842506	1	0.842499	0.892447	0.788002	0.77799	0.847619	0.845712	0.865324	0.863019	0.951878	0.799998	0.812767	0.911876	0.879644	0.876098	0.86658	0.870091		0.860985	0.0560066	38
	0.91	0.88192	1	0.804235	0.887015	0.863103	0.814337	0.901319	0.867768	0.780518	0.942056	0.757117	1	0.958917	0.839997	0.947222	0.899526	0.873649	0.885587	0.911497	0.815727	0.806196	0.97352	0.95799	0.813634	0.743679	0.766333	0.870852	0.950515	0.915611	0.892271	0.923844	0.791478	0.850109	0.851136	0.86223	0.870892	1	0.88624		0.877843	0.0679337	38
	0.975	0.879037	0.903445	0.889841	0.914731	0.897322	0.865803	0.95273	0.83642	0.800592	0.990106	0.804727	0.915544	0.921035	0.853497	0.920066	0.914633	0.867519	0.914404	0.973112	0.867269	0.906763	0.972895	0.950771	0.850723	0.859363	0.872498	0.862292	0.89797	0.959744	0.904881	0.931752	0.802935	0.908881	0.863656	0.821544	0.894436	0.945847	0.917109		0.894892	0.047073	38
	1.04	0.966342	0.919968	0.842715	0.944841	0.905957	0.932247	1	0.845252	0.87025	1	0.956174	0.938512	0.844027	0.934055	0.880073	0.947844	0.928822	0.935974	1	0.921864	0.885831	0.936765	0.920585	0.91331	0.86398	0.884286	0.894606	0.898031	0.941413	0.902653	0.967231	0.840244	0.907955	0.876013	0.833185	0.945777	0.919922	0.900799		0.914408	0.0436859	38
	1.105	0.915358	0.848615	0.770738	0.964348	0.863977	1	0.876678	0.92408	0.896026	0.959232	0.869515	0.950981	0.834499	0.935238	0.940065	0.991993	0.974901	0.978782	0.938048	0.855506	0.869199	0.924024	0.994675	0.915628	0.875055	0.821806	0.986064	1	0.876939	0.920756	1	0.877872	0.892989	0.882508	0.867653	0.871563	0.912529	0.905594		0.912722	0.0553984	38
	1.17	0.986076	0.942966	0.772812	0.963277	0.952471	0.960661	0.821197	0.913085	0.810648	0.900919	0.818201	0.939265	0.930604	0.987134	0.903575	1	0.922761	1	0.979855	0.874492	0.881291	0.91398	0.842566	0.892447	0.9753	0.861121	1	0.949084	0.958915	0.870822	0.989314	0.88199	1	0.873814	0.902524	0.834817	0.885111	0.959867		0.917183	0.0603057	38
	1.235	0.89766	0.833909	0.85361	1	1	0.920656	0.911103	0.919963	0.942525	0.86671	0.866076	0.918327	0.820365	0.953397	0.930841	0.959211	0.940124	0.980623	0.894471	0.948875	0.932639	0.909825	1	0.899401	1	0.856432	0.959374	0.882325	0.938995	0.934628	0.934602	0.995613	0.974123	0.884636	0.939575	0.903055	0.847004	0.982036		0.924545	0.0486569	38
	1.3	0.897819	0.864107	0.803808	0.875892	0.96218	0.937127	0.885364	0.927208	0.956862	0.867054	0.904449	0.939675	0.811162	1	0.927993	0.884842	1	0.879895	0.919504	0.980332	0.912347	0.884572	0.792796	0.850723	0.974063	0.894408	0.896766	0.878254	1	0.872079	0.926121	0.97039	0.981899	0.878169	0.933981	1	0.839529	1		0.913457	0.0564811	38
	1.365	0.918057	0.938101	0.828771	0.913692	0.883153	0.920075	0.905101	0.873283	0.976644	0.927817	1	0.943634	0.778948	0.981019	0.950546	0.896504	0.968919	0.857686	0.956001	1	0.961479	0.849412	0.922877	0.815952	0.870451	0.876493	0.819734	0.880311	0.848765	0.885759	0.853059	0.943089	0.992451	0.824117	0.915432	0.893672	0.873273	0.99238		0.906228	0.0566398	38
	1.43	0.916583	0.916545	0.826759	0.887755	0.980871	0.905152	0.798015	0.855153	1	0.931796	0.987911	0.876822	0.754256	0.97527	0.98818	0.983631	0.925713	0.897307	0.979434	0.970548	1	0.889795	0.843546	0.920264	0.822994	0.732093	0.902492	0.877725	0.906516	1	0.816308	0.934639	0.972574	0.926951	0.886227	0.905357	0.8628	0.940091		0.907844	0.0671582	38
	1.495	0.886177	0.84184	0.839321	0.906047	0.96787	0.899391	0.779211	0.920254	0.9792	0.908609	0.957331	0.807417	0.806958	0.940642	0.944187	0.890857	0.909847	0.880051	0.887138	0.906212	0.929008	0.860977	0.812153	0.920264	0.793411	0.884412	0.924471	0.862203	0.970388	0.992853	0.865826	0.89588	0.973368	1	0.927441	0.853737	0.87476	0.876665		0.896747	0.0552716	38
	1.56	0.966734	0.926854	0.85293	0.948359	0.922136	0.844245	0.82189	0.822046	0.95382	0.861105	0.947064	0.869394	0.802232	0.913292	1	0.878513	0.860841	0.783216		0.878664	0.89914	0.840199	0.817553	0.934172	0.875618	0.895353	0.956749	0.94329	0.970896	0.817044	0.819185	1	0.916832	0.952526	0.950708	0.884978	0.869178	0.914731		0.894905	0.0570984	37
	1.625	1	0.88217	0.78765	0.949479	0.903464	0.857076	0.829801	0.849136	0.946623	0.794338	0.893496	0.894355	0.768611	0.886072		0.876081	0.866032	0.859698		0.869567	0.951773	0.877565	0.902739	0.857681	0.780882	0.925235	0.879865	0.845238	0.991404	0.813901	0.866379	0.874289	0.966164	0.903312	0.91786	0.85698	0.839521	0.880816		0.879035	0.0541183	36
	1.69	0.874116	0.827237	0.775986	0.937653	0.912073	0.854953	0.786359	0.982781	0.906551	0.800917	0.964359	0.784743	0.815687	0.786686		0.809485	0.839144	0.93769		0.86643	0.908187	0.825074	0.860952	0.851729	0.832469	0.883355	0.857405	0.929028	0.905214		0.885654	0.83795	0.932697	0.872859	1	0.99177	0.879092	0.778901		0.871291	0.0618706	35
	1.755	0.945291	0.809197	0.816395	0.951887	0.817537	0.80463	0.878246	0.877153	0.883631	0.762733	0.95306	0.901617	0.85297			0.811776	0.875874	0.863819		0.812967	0.935863	0.806004	0.841613	0.966875	0.881181	0.829694	0.923744	0.851589	0.8262		0.931607	0.863977	0.875844	0.824502		0.947273	0.855666	0.834253		0.867111	0.0526049	33
	1.82	0.944186	0.834154	0.802692	0.822631	0.826563	0.783525	0.80655		0.918887	0.756111	0.861325	0.918038	0.835912			0.801066	0.829584	0.869737		0.775378	0.930803	0.822634	0.838812	0.986101	0.828909	0.847075	0.894145	0.945527			0.837613	0.836319	0.874072	0.899505		0.934844	0.791743	0.736196		0.851311	0.0597217	31
	1.885	0.861172	0.887812	0.751214	0.858296	0.936386	0.7831			0.875695	0.774394		0.915515	0.847214			0.848853	0.891362	0.89643		0.810245	0.881034		0.921464	0.901866	0.837297	1	0.884796	0.9886				0.809401	0.803605	0.863345		0.842725		0.842904		0.865951	0.0584263	26
	1.95	0.937161	0.821054	0.784471	0.869204		0.764998			0.919072	0.797641		0.88458	0.772234			0.843422	0.861918	0.875881		0.836189	0.920058		0.909556	0.97672	0.769183	0.98264	0.815507	0.960945				0.830747	0.868518			0.862768		0.870823		0.86397	0.0628779	24
	2.015		0.816349		0.904311		0.730688						0.841096					0.84376	0.864527			0.804491		0.934509	0.983815	0.734448	0.826403	0.894742	0.940681				0.773353	0.918049					0.761866		0.848318	0.0742158	16
	2.08		0.793395		0.884954													0.812781	0.921719			0.827662			0.94894	0.69234	0.798389	0.928175	0.872248				0.818659								0.845387	0.0714257	11
	2.145		0.81381															0.746126							0.912311	0.737253		0.855415	0.901335				0.824452								0.827243	0.0636802	7
	2.21		0.872446																						0.896954	0.742577		0.800647					0.836647								0.829854	0.0544662	5
	2.275																								0.950602	0.7269		0.816518					0.786449								0.820117	0.0819488	4
	2.34																								1			0.800712													0.900356	0.0996439	2
	2.405																								0.936826			0.80045													0.868638	0.068188	2
	2.47
	2.535
	2.6
	2.665

## Sheet: Nup116_raw
	WellK03_PointK03_0000_ChannelBF,GFP_BP_dual,mCherrydual_Seq0085.nd2_1_x	WellK03_PointK03_0000_ChannelBF,GFP_BP_dual,mCherrydual_Seq0085.nd2_1_I_GFP	WellK03_PointK03_0000_ChannelBF,GFP_BP_dual,mCherrydual_Seq0085.nd2_1_I_mCh	WellK03_PointK03_0000_ChannelBF,GFP_BP_dual,mCherrydual_Seq0085.nd2_2_x	WellK03_PointK03_0000_ChannelBF,GFP_BP_dual,mCherrydual_Seq0085.nd2_2_I_GFP	WellK03_PointK03_0000_ChannelBF,GFP_BP_dual,mCherrydual_Seq0085.nd2_2_I_mCh	WellK03_PointK03_0000_ChannelBF,GFP_BP_dual,mCherrydual_Seq0085.nd2_3_x	WellK03_PointK03_0000_ChannelBF,GFP_BP_dual,mCherrydual_Seq0085.nd2_3_I_GFP	WellK03_PointK03_0000_ChannelBF,GFP_BP_dual,mCherrydual_Seq0085.nd2_3_I_mCh	WellK03_PointK03_0000_ChannelBF,GFP_BP_dual,mCherrydual_Seq0085.nd2_4_x	WellK03_PointK03_0000_ChannelBF,GFP_BP_dual,mCherrydual_Seq0085.nd2_4_I_GFP	WellK03_PointK03_0000_ChannelBF,GFP_BP_dual,mCherrydual_Seq0085.nd2_4_I_mCh	WellK03_PointK03_0000_ChannelBF,GFP_BP_dual,mCherrydual_Seq0085.nd2_5_x	WellK03_PointK03_0000_ChannelBF,GFP_BP_dual,mCherrydual_Seq0085.nd2_5_I_GFP	WellK03_PointK03_0000_ChannelBF,GFP_BP_dual,mCherrydual_Seq0085.nd2_5_I_mCh	WellK03_PointK03_0000_ChannelBF,GFP_BP_dual,mCherrydual_Seq0085.nd2_6_x	WellK03_PointK03_0000_ChannelBF,GFP_BP_dual,mCherrydual_Seq0085.nd2_6_I_GFP	WellK03_PointK03_0000_ChannelBF,GFP_BP_dual,mCherrydual_Seq0085.nd2_6_I_mCh	WellK03_PointK03_0000_ChannelBF,GFP_BP_dual,mCherrydual_Seq0085.nd2_7_x	WellK03_PointK03_0000_ChannelBF,GFP_BP_dual,mCherrydual_Seq0085.nd2_7_I_GFP	WellK03_PointK03_0000_ChannelBF,GFP_BP_dual,mCherrydual_Seq0085.nd2_7_I_mCh	WellK03_PointK03_0000_ChannelBF,GFP_BP_dual,mCherrydual_Seq0085.nd2_9_x	WellK03_PointK03_0000_ChannelBF,GFP_BP_dual,mCherrydual_Seq0085.nd2_9_I_GFP	WellK03_PointK03_0000_ChannelBF,GFP_BP_dual,mCherrydual_Seq0085.nd2_9_I_mCh	WellK03_PointK03_0000_ChannelBF,GFP_BP_dual,mCherrydual_Seq0085.nd2_10_x	WellK03_PointK03_0000_ChannelBF,GFP_BP_dual,mCherrydual_Seq0085.nd2_10_I_GFP	WellK03_PointK03_0000_ChannelBF,GFP_BP_dual,mCherrydual_Seq0085.nd2_10_I_mCh	WellK03_PointK03_0000_ChannelBF,GFP_BP_dual,mCherrydual_Seq0085.nd2_11_x	WellK03_PointK03_0000_ChannelBF,GFP_BP_dual,mCherrydual_Seq0085.nd2_11_I_GFP	WellK03_PointK03_0000_ChannelBF,GFP_BP_dual,mCherrydual_Seq0085.nd2_11_I_mCh	WellK03_PointK03_0000_ChannelBF,GFP_BP_dual,mCherrydual_Seq0085.nd2_12_x	WellK03_PointK03_0000_ChannelBF,GFP_BP_dual,mCherrydual_Seq0085.nd2_12_I_GFP	WellK03_PointK03_0000_ChannelBF,GFP_BP_dual,mCherrydual_Seq0085.nd2_12_I_mCh	WellK03_PointK03_0000_ChannelBF,GFP_BP_dual,mCherrydual_Seq0085.nd2_13_x	WellK03_PointK03_0000_ChannelBF,GFP_BP_dual,mCherrydual_Seq0085.nd2_13_I_GFP	WellK03_PointK03_0000_ChannelBF,GFP_BP_dual,mCherrydual_Seq0085.nd2_13_I_mCh	WellK03_PointK03_0000_ChannelBF,GFP_BP_dual,mCherrydual_Seq0085.nd2_14_x	WellK03_PointK03_0000_ChannelBF,GFP_BP_dual,mCherrydual_Seq0085.nd2_14_I_GFP	WellK03_PointK03_0000_ChannelBF,GFP_BP_dual,mCherrydual_Seq0085.nd2_14_I_mCh	WellK03_PointK03_0000_ChannelBF,GFP_BP_dual,mCherrydual_Seq0085.nd2_15_x	WellK03_PointK03_0000_ChannelBF,GFP_BP_dual,mCherrydual_Seq0085.nd2_15_I_GFP	WellK03_PointK03_0000_ChannelBF,GFP_BP_dual,mCherrydual_Seq0085.nd2_15_I_mCh	WellK03_PointK03_0000_ChannelBF,GFP_BP_dual,mCherrydual_Seq0085.nd2_16_x	WellK03_PointK03_0000_ChannelBF,GFP_BP_dual,mCherrydual_Seq0085.nd2_16_I_GFP	WellK03_PointK03_0000_ChannelBF,GFP_BP_dual,mCherrydual_Seq0085.nd2_16_I_mCh	WellK03_PointK03_0001_ChannelBF,GFP_BP_dual,mCherrydual_Seq0086.nd2_1_x	WellK03_PointK03_0001_ChannelBF,GFP_BP_dual,mCherrydual_Seq0086.nd2_1_I_GFP	WellK03_PointK03_0001_ChannelBF,GFP_BP_dual,mCherrydual_Seq0086.nd2_1_I_mCh	WellK03_PointK03_0001_ChannelBF,GFP_BP_dual,mCherrydual_Seq0086.nd2_2_x
1	0	269	4848	0	346	12483	0	293	8123	0	240	5235	0	232	5827	0	205	3535	0	278	5316	0	287	8908	0	225	3221	0	257	2701	0	291	6131	0	271	7641	0	254	2450	0	295	6830	0	287	16160	0	294	3828	0
2	0.065	265.674	5474.52	0.065	328.884	13861.4	0.065	270.411	8972.07	0.065	265.151	6178.37	0.065	254.902	6740.44	0.065	249.471	4199.82	0.065	313.115	6602.81	0.065	296.512	11990.6	0.065	261.123	3818.71	0.065	250	3026	0.065	290.127	6675.31	0.065	266.347	9159.54	0.065	268.002	2755.79	0.065	258.516	7674.12	0.065	285.881	18930.5	0.065	269.732	4147.86	0.065
3	0.13	299.065	6241.27	0.13	334.083	15031.6	0.13	264.407	10048.4	0.13	271.067	7703.28	0.13	236.597	7635.53	0.13	250.785	5348.75	0.13	338.621	7587.65	0.13	289.017	15748.2	0.13	285.433	4487.87	0.13	230	3572	0.13	308.998	7369.13	0.13	313.284	10222.6	0.13	278.15	3137.28	0.13	298.626	8904.08	0.13	300.897	23157	0.13	313.095	4537.05	0.13
4	0.195	293.818	7087.79	0.195	340.277	16550.5	0.195	275.305	11495.5	0.195	260.972	9761.72	0.195	280.313	9669.11	0.195	257.999	6895.74	0.195	295.053	9056.57	0.195	309.5	19997.9	0.195	289.82	5086.38	0.195	278	3830	0.195	326.146	8219.17	0.195	334.372	12700.5	0.195	284.293	3670.8	0.195	269.324	10576.8	0.195	332.012	28489.1	0.195	288.597	5105.12	0.195
5	0.26	281.907	9132.58	0.26	351.482	18571.6	0.26	291.125	13726.5	0.26	256.215	12548.7	0.26	271.165	12174.5	0.26	252.248	9348.68	0.26	296.89	11685.8	0.26	285	24497.2	0.26	296.957	6122.6	0.26	248	4616	0.26	320.2	9384.45	0.26	311.692	15453.3	0.26	297.109	4057.36	0.26	280.041	12767.5	0.26	327.962	35254.1	0.26	278.924	5823.22	0.26
6	0.325	326.146	11807	0.325	359.277	20933.7	0.325	321.895	16373.7	0.325	298.284	16622.1	0.325	266.305	15650.5	0.325	244.747	12452.1	0.325	325.996	16335.4	0.325	317.462	28809.6	0.325	297.901	8012.63	0.325	253	6064	0.325	330.238	11272.5	0.325	311.45	20198.2	0.325	315.299	4521.07	0.325	286.893	15183.8	0.325	345.72	42453.6	0.325	280.591	6893.19	0.325
7	0.39	295.023	15432.9	0.39	366.626	23700	0.39	352.292	19699.8	0.39	349.297	21764.8	0.39	282.119	19036	0.39	249.968	16518.8	0.39	308.462	22641.6	0.39	332.58	32808.2	0.39	296.669	11613.2	0.39	289	8232	0.39	327.948	13862.2	0.39	319.724	25919.8	0.39	287.666	5473.31	0.39	277.71	18059.4	0.39	329.648	50336.5	0.39	273.981	7736.63	0.39
8	0.455	309.718	19197	0.455	373.514	26899.2	0.455	339.388	23466.5	0.455	322.832	27457.7	0.455	294.556	23089.4	0.455	269.885	20859	0.455	373.518	30075.7	0.455	334.51	36650.2	0.455	295.212	17383	0.455	296	11343	0.455	331.302	17840.1	0.455	286.42	32308.9	0.455	289.916	7039.27	0.455	280.088	21602	0.455	354.708	56945.2	0.455	289.163	9268.95	0.455
9	0.52	324.707	24125.8	0.52	407.002	31194.2	0.52	333.606	26951.2	0.52	357.159	33359.4	0.52	317.118	26293.9	0.52	280.093	25598.3	0.52	377.194	37112.2	0.52	337.774	39251.3	0.52	302.681	25305.1	0.52	308	15796	0.52	360.336	23294.7	0.52	319.386	37819.4	0.52	288.768	9239.28	0.52	316.768	25574	0.52	401.787	61556.4	0.52	285.805	10743.1	0.52
10	0.585	334.364	28683.7	0.585	378.482	35234	0.585	346.913	30275.8	0.585	343.04	38875.2	0.585	324.042	29420.3	0.585	280.619	29440.9	0.585	410.281	43228.1	0.585	361.047	41171.9	0.585	326.836	33923.5	0.585	311	20851	0.585	373.077	29851.6	0.585	340.254	41697.4	0.585	316.13	12865.4	0.585	360.052	30109.7	0.585	390.944	65014.9	0.585	282.243	13262	0.585
11	0.65	343.548	31301.2	0.65	396.54	39171.3	0.65	339.649	32875.3	0.65	347.434	42991.4	0.65	326.67	31935.1	0.65	312.97	32267	0.65	399.631	45429.9	0.65	369.448	42315.2	0.65	323.785	42350.4	0.65	342	25625	0.65	372.529	36843.2	0.65	339.467	43170.3	0.65	313.484	17417.8	0.65	335.69	34789.7	0.65	451.526	65526.1	0.65	330.2	16343.3	0.65
12	0.715	361.179	33335.9	0.715	414.044	42783	0.715	377.613	35743.4	0.715	369.809	45958.7	0.715	339.925	33929	0.715	346.645	33438.9	0.715	466.654	46804.7	0.715	408.293	43145.5	0.715	361.197	48652.9	0.715	331	30257	0.715	364.737	43166.5	0.715	346.776	44243.1	0.715	334.615	22337.8	0.715	379.291	38925.2	0.715	431.533	65535	0.715	306.067	20132.2	0.715
13	0.78	345.631	35260.9	0.78	414.67	47066.7	0.78	381.792	37098.3	0.78	380.934	46201.2	0.78	388.009	35923.9	0.78	374.335	33026.9	0.78	523.492	48417	0.78	429.627	43130.3	0.78	411.959	52224.9	0.78	339	34021	0.78	383.522	48109.7	0.78	370.876	44196.2	0.78	352.627	26410.2	0.78	383.84	42817.9	0.78	411.48	65535	0.78	349.313	24598.3	0.78
14	0.845	389.539	34241.7	0.845	449.041	51817.5	0.845	454.977	37812.5	0.845	417.289	45211.2	0.845	383.372	37433.3	0.845	399.055	30917.1	0.845	566.828	49309.5	0.845	423.057	42767.1	0.845	407.052	55121	0.845	330	36002	0.845	437.915	51119.5	0.845	379.632	42517.6	0.845	364.041	29523.4	0.845	403.404	45504.6	0.845	491.751	64031.4	0.845	347.634	30388.8	0.845
15	0.91	420.371	32547.6	0.91	450.271	55522	0.91	480.395	37770.6	0.91	422.906	41890	0.91	418.939	38717.5	0.91	458.898	28241.3	0.91	561.146	48707.7	0.91	450.061	42290.7	0.91	406.513	57593.9	0.91	340	37193	0.91	437.301	52531.4	0.91	380.436	39467.2	0.91	414.22	30599.4	0.91	440.818	47509.5	0.91	433.904	59931.8	0.91	317.529	35450.4	0.91
16	0.975	419.18	29191	0.975	460.56	57392.7	0.975	443.448	36206.8	0.975	460.72	37115.2	0.975	412.832	38652.4	0.975	499.035	25056.4	0.975	583.099	47851	0.975	456.766	41343.3	0.975	459.68	58459.5	0.975	321	37994	0.975	434.964	52857.2	0.975	419.276	34891.4	0.975	431.799	29809	0.975	473.864	48171	0.975	512.888	55864.1	0.975	352.187	40775.6	0.975
17	1.04	441.318	25668.6	1.04	516.917	58154.3	1.04	559.166	34213.7	1.04	512.156	32666.1	1.04	450.148	38051.8	1.04	537.471	22164.6	1.04	630.333	43386.1	1.04	486.076	40036.4	1.04	512.501	57752.2	1.04	359	37266	1.04	498.666	52226.9	1.04	418.521	29624.6	1.04	510.221	28002	1.04	566.345	47825.6	1.04	575.877	48927.3	1.04	397.579	44794.4	1.04
18	1.105	469.702	21781	1.105	570.897	56581.6	1.105	609.69	32011	1.105	544.425	27756.9	1.105	460.099	36456.8	1.105	529.769	20115.1	1.105	639.857	37869.6	1.105	486.809	37423.8	1.105	593.424	54002.4	1.105	363	36186	1.105	541.236	50239	1.105	453.762	25158.9	1.105	538.997	25727.5	1.105	598.332	46186.2	1.105	581.019	43033.3	1.105	427.886	47515	1.105
19	1.17	497.627	18809.2	1.17	619.634	53481.2	1.17	638.184	29697.4	1.17	491.585	23770.2	1.17	526.307	34123.5	1.17	502.233	18482.5	1.17	716.254	32303	1.17	545.68	34690.1	1.17	661.244	47842.6	1.17	373	33945	1.17	624.76	46296.5	1.17	502.921	21784	1.17	561.526	23250.3	1.17	654.575	44257.6	1.17	615.483	38784.5	1.17	435.197	48616.7	1.17
20	1.235	482.546	16417.6	1.235	620.28	49745.3	1.235	599.595	27174.6	1.235	489.642	20829.4	1.235	611.138	30719.1	1.235	477.138	17198.2	1.235	667.428	27521	1.235	548.23	32169.7	1.235	750.359	40921.7	1.235	449	30516	1.235	672.699	41390.8	1.235	490.074	19630.1	1.235	492.761	21634	1.235	651.224	41691	1.235	694.344	34229.6	1.235	483.347	48066.8	1.235
21	1.3	520.374	14570.2	1.3	599.6	45081.6	1.3	558.691	24669.5	1.3	451.245	18544.8	1.3	648.79	27551.7	1.3	476.712	16377.5	1.3	698.824	23067.8	1.3	578.887	29581.3	1.3	773.031	33521.8	1.3	434	25516	1.3	698.099	35591.3	1.3	492.03	18147.7	1.3	463.371	20399.4	1.3	598.496	38572.7	1.3	685.935	31326.3	1.3	558.795	46345.8	1.3
22	1.365	437.295	13042.2	1.365	553.722	39628.3	1.365	508.928	23066.3	1.365	435.215	16859.2	1.365	642.207	24629.4	1.365	419.681	15936.9	1.365	606.911	20657.4	1.365	577.132	27544.6	1.365	744.148	27782.2	1.365	510	20784	1.365	675.438	30451.3	1.365	451.255	16714.9	1.365	455.142	18985.3	1.365	535.712	35722.1	1.365	608.317	28442	1.365	593.881	43540.6	1.365
23	1.43	433.289	12164.4	1.43	541.571	35671.5	1.43	450.766	21936.1	1.43	392.774	15729.6	1.43	598.039	22396.9	1.43	415.833	15404.6	1.43	589.586	18600.9	1.43	537.032	25359.8	1.43	665.789	23573.4	1.43	437	16117	1.43	655.529	25950.7	1.43	435.16	15811	1.43	440.295	17484.6	1.43	493.829	33241.8	1.43	581.864	26726	1.43	586.544	39791.1	1.43
24	1.495	453.084	11606.1	1.495	572.511	31085.5	1.495	510.238	20923.9	1.495	373.981	14933.2	1.495	567.991	20576.1	0	0	0	1.495	535.857	17066.3	1.495	513.964	23063.6	1.495	666.345	20787.5	1.495	461	13008	1.495	623.67	22712.9	1.495	401.307	14889.8	1.495	376.155	15955.2	1.495	464.078	30888.3	1.495	545.786	24941.7	1.495	606.855	35523.4	1.495
25	1.56	413.998	11066.5	1.56	541.725	27213.9	1.56	479.965	19910.3	1.56	396.595	14221.6	1.56	521.468	19139.1	0	0	0	1.56	528.138	15276	1.56	478.745	20941.9	1.56	625.337	18849.9	1.56	467	10549	1.56	584.826	20621.1	1.56	395.266	13915.5	1.56	403.086	13611.6	1.56	459.027	29344	1.56	548.001	23173.1	1.56	575.354	32446.3	1.56
26	1.625	412.149	10825.8	1.625	448.95	24237.1	1.625	464.99	19690	1.625	408.093	13262.8	1.625	516.751	17852.6	0	0	0	1.625	486.585	14339.9	1.625	463.931	18966.7	1.625	677.872	17014.6	1.625	404	8554	1.625	583.149	19317.1	1.625	381.824	13411.6	1.625	393.461	11679.7	1.625	477.302	27468.1	1.625	515.415	21943.7	1.625	542.911	29205.8	1.625
27	1.69	401.204	10562	1.69	448.95	21570.2	1.69	430.633	18848.1	1.69	398.181	12589.2	1.69	512.389	16657.9	0	0	0	1.69	493.175	12978.4	1.69	442.104	17043.2	1.69	547.281	15632.8	1.69	420	7794	1.69	495.016	18714.5	1.69	366.028	12996.6	1.69	401.307	10461.9	1.69	498.642	26475.2	1.69	499.03	20828.1	1.69	504.046	26058.7	1.69
28	1.755	410.686	10415.4	1.755	456.986	19146.2	1.755	460.018	18315.7	0	0	0	1.755	476.754	15682	0	0	0	1.755	463.206	12115.3	1.755	438.845	15332	1.755	524.48	14753.8	1.755	416	7142	1.755	490.108	18068.5	1.755	385.405	12788.7	1.755	389.136	9869.42	1.755	457.969	24752.4	1.755	535.987	19570.1	1.755	470.084	24121.6	1.755
29	1.82	396.828	10354	1.82	420.837	17664.9	1.82	451.313	17459.2	0	0	0	1.82	508.151	15059.2	0	0	0	1.82	419.897	11465.7	1.82	398.062	13820.2	1.82	491.898	13867.2	1.82	375	6966	1.82	461.5	17504.3	1.82	382.497	12767.9	1.82	407.719	9398.84	1.82	458.125	23981.2	1.82	476.698	18733	1.82	456.072	22092.8	1.82
30	1.885	397.487	9655.15	1.885	423.709	16202.7	1.885	469.938	16871.5	0	0	0	1.885	470.687	14417.5	0	0	0	1.885	417.365	10682.5	1.885	362.747	12368.4	1.885	481.758	12926	1.885	409	6781	1.885	454.065	17230.7	0	0	0	1.885	405.859	9222.21	1.885	444.766	22929.7	1.885	494.062	18193.9	1.885	418.979	20297.6	0
31	1.95	360.779	9837.06	0	0	0	1.95	436.355	16422.9	0	0	0	1.95	471.299	13906.7	0	0	0	1.95	437.687	10490.6	0	0	0	1.95	502.179	12394.7	1.95	381	6673	1.95	454.604	16884.1	0	0	0	1.95	388.058	9505.25	1.95	439.297	21881.7	1.95	491.873	17398.5	1.95	420.848	18768.2	0
32	0	0	0	0	0	0	2.015	403.049	15830.8	0	0	0	2.015	447.656	13355.4	0	0	0	2.015	413.906	9836.06	0	0	0	2.015	481.93	11957.4	2.015	376	6637	0	0	0	0	0	0	2.015	394.529	9989.49	2.015	423.887	21065.1	2.015	452.395	17053.2	2.015	428.768	17077.6	0
33	0	0	0	0	0	0	2.08	391.623	15049.6	0	0	0	2.08	430.362	12916.7	0	0	0	2.08	435.144	9284.44	0	0	0	2.08	458.191	11556.7	2.08	397	6565	0	0	0	0	0	0	2.08	390.222	10301	2.08	421.857	20259.2	2.08	479.859	16357.1	0	0	0	0
34	0	0	0	0	0	0	0	0	0	0	0	0	0	0	0	0	0	0	2.145	415.762	8821.98	0	0	0	2.145	471.663	10803	2.145	365	6674	0	0	0	0	0	0	0	0	0	0	0	0	2.145	471.182	15648.9	0	0	0	0
35	0	0	0	0	0	0	0	0	0	0	0	0	0	0	0	0	0	0	2.21	397.113	8756.74	0	0	0	2.21	473.841	10032	2.21	368	6419	0	0	0	0	0	0	0	0	0	0	0	0	2.21	485.823	14875.4	0	0	0	0
36	0	0	0	0	0	0	0	0	0	0	0	0	0	0	0	0	0	0	0	0	0	0	0	0	2.275	453.21	9337.98	0	0	0	0	0	0	0	0	0	0	0	0	0	0	0	0	0	0	0	0	0	0
37	0	0	0	0	0	0	0	0	0	0	0	0	0	0	0	0	0	0	0	0	0	0	0	0	0	0	0	0	0	0	0	0	0	0	0	0	0	0	0	0	0	0	0	0	0	0	0	0	0
38	0	0	0	0	0	0	0	0	0	0	0	0	0	0	0	0	0	0	0	0	0	0	0	0	0	0	0	0	0	0	0	0	0	0	0	0	0	0	0	0	0	0	0	0	0	0	0	0	0
[truncated: 104 more columns]

## Sheet: Nup116_normalized
0	269	346	293	240	232	205	278	287	225	257	291	271	254	295	287	294	288	251	276	241	291	293	299	287	256	289	264	243	286	249	267	292	219	347	203	298	236	273	263	212	234	301	246	313	353	285	262	245	238
0.065	265.674	328.884	270.411	265.151	254.902	249.471	313.115	296.512	261.123	250	290.127	266.347	268.002	258.516	285.881	269.732	293.336	255.449	299.999	219.405	299.7	271.997	273.614	287.867	251.499	285.048	279.212	227.165	329.354	233.993	266.319	316.721	237.337	297.144	228.185	296.522	243.312	254.093	240.263	227.137	268.169	286.962	275.134	294.519	310.25	259.703	284.384	263.011	269.643
0.13	299.065	334.083	264.407	271.067	236.597	250.785	338.621	289.017	285.433	230	308.998	313.284	278.15	298.626	300.897	313.095	287.811	263.223	245.455	223.551	292.382	299.931	285.586	292.786	265.311	270.061	305.373	251.037	301.669	266.608	281.106	319.982	244.247	350.529	241.867	301.575	246.183	260.771	252.738	224.478	283.793	263.101	277.444	319.852	334.794	293.839	271.193	253.408	259.37
0.195	293.818	340.277	275.305	260.972	280.313	257.999	295.053	309.5	289.82	278	326.146	334.372	284.293	269.324	332.012	288.597	274.778	273.783	292.38	267.87	279.364	303.529	284.427	282.268	264.244	282.401	298.324	256.282	318.103	272.561	294.431	312.465	244.163	340.054	261.733	302.963	249.918	288.349	267.58	240.402	260.327	309.433	274.463	307.984	332.484	291.667	248.677	262.432	257.147
0.26	281.907	351.482	291.125	256.215	271.165	252.248	296.89	285	296.957	248	320.2	311.692	297.109	280.041	327.962	278.924	302.801	259.06	267.518	257.532	308.34	313.589	289.648	318.433	289.361	295.127	306.909	255.826	306.548	259.825	314.65	270.202	253.595	305.575	251.429	309.154	286.644	270.749	288.028	266.493	264.364	343.602	264.951	290.331	320.709	325.441	277.743	277.559	282.206
0.325	326.146	359.277	321.895	298.284	266.305	244.747	325.996	317.462	297.901	253	330.238	311.45	315.299	286.893	345.72	280.591	315.744	269.065	294.55	237.264	326.643	324.446	303.572	317.454	305.928	301.724	350.563	276.314	314.838	258.988	328.602	303.515	258.289	342.257	261.429	292.078	287.343	290.997	287.765	260.08	254.043	294.666	298.853	301.957	323.006	324.848	290.594	263.349	300.396
0.39	295.023	366.626	352.292	349.297	282.119	249.968	308.462	332.58	296.669	289	327.948	319.724	287.666	277.71	329.648	273.981	296.71	286.891	307.919	284.647	340.724	358.898	308.358	350.487	322.815	327.366	318.523	284.813	332.479	286.158	294.597	339.553	238.05	341.574	269.588	300.77	274.365	288.741	282.479	256.316	287.167	299.886	286.719	331.259	329.965	287.595	313.465	264.392	282.87
0.455	309.718	373.514	339.388	322.832	294.556	269.885	373.518	334.51	295.212	296	331.302	286.42	289.916	280.088	354.708	289.163	324.019	310.593	321.484	281.094	379.406	377.403	309.445	342.543	316.223	324.08	376.796	288.92	348.683	304.027	301.866	339.213	246.304	351.815	284.291	286.361	274.471	287.384	287.523	262.056	284.585	326.913	302.172	300.377	343.87	303.134	310.125	294.345	334.758
0.52	324.707	407.002	333.606	357.159	317.118	280.093	377.194	337.774	302.681	308	360.336	319.386	288.768	316.768	401.787	285.805	334.279	292.362	317.699	254.2	386.128	380.715	307.114	349.384	320.565	320.994	415.146	304.517	334.732	331.483	306.261	317.935	286.163	391.015	292.94	337.613	297.796	290.684	252.622	278.225	302.338	279.738	286.522	349.157	341.308	301.786	306.324	294.841	303.088
0.585	334.364	378.482	346.913	343.04	324.042	280.619	410.281	361.047	326.836	311	373.077	340.254	316.13	360.052	390.944	282.243	316.976	292.15	336.317	285.197	355.245	411.121	302.249	347.781	320.803	351.669	447.285	306.879	327.614	301.591	342.994	340.456	288.343	378.581	299.797	342.912	295.085	321.683	282.37	301.691	312.469	319.853	330.922	372.769	373.38	312.397	326.82	324.303	310.495
0.65	343.548	396.54	339.649	347.434	326.67	312.97	399.631	369.448	323.785	342	372.529	339.467	313.484	335.69	451.526	330.2	322.683	307.249	330.691	306.676	415.974	421.149	306.24	372.204	345.5	364.493	445.637	310.568	332.896	298.798	358.786	375.003	286.541	376.504	324.433	287.183	299.504	326.505	310.86	312.684	306.751	346.104	339.263	372.896	405.899	320.58	325.494	316.618	325.646
0.715	361.179	414.044	377.613	369.809	339.925	346.645	466.654	408.293	361.197	331	364.737	346.776	334.615	379.291	431.533	306.067	327.19	322.269	362.039	320.613	456.994	497.846	341.815	387.949	380.469	363.305	422.891	318.621	365.375	316.955	370.845	388.301	296.134	417.497	335.655	312.101	323.654	354.722	323.296	287.358	321.822	346.326	323.59	387.001	372.418	334.083	348.482	325.243	361.212
0.78	345.631	414.67	381.792	380.934	388.009	374.335	523.492	429.627	411.959	339	383.522	370.876	352.627	383.84	411.48	349.313	323.734	343.724	383.854	341.559	494.52	461.806	342.225	399.006	432.329	392.655	498.038	326.181	386.668	311.214	363.695	368.246	324.86	451.531	318.966	353.268	340.047	360.726	357.334	333.436	337.106	350.747	342.847	363.005	451.464	361.603	374.188	343.48	388.108
0.845	389.539	449.041	454.977	417.289	383.372	399.055	566.828	423.057	407.052	330	437.915	379.632	364.041	403.404	491.751	347.634	337.219	366.247	367.097	286.244	583.016	536.075	369.257	414.32	501.812	399.874	539.77	348.205	435.728	335.012	360.634	405.815	327.43	450.994	351.878	350.413	369.29	332.908	368.214	329.998	363.523	406.477	354.934	385.534	468.083	372.46	401.095	355.34	464.577
0.91	420.371	450.271	480.395	422.906	418.939	458.898	561.146	450.061	406.513	340	437.301	380.436	414.22	440.818	433.904	317.529	414.124	409.29	410.192	286.802	638.752	615.374	339.111	433.259	581.611	471.393	563.554	338.005	497.158	338.797	372.401	460.848	328.031	443.159	357.449	386.356	375.809	344.509	368.858	340.719	371.994	465.309	319.006	423.17	467.678	365.787	411.311	379.963	482.168
0.975	419.18	460.56	443.448	460.72	412.832	499.035	583.099	456.766	459.68	321	434.964	419.276	431.799	473.864	512.888	352.187	429.275	462.024	470.361	320.942	763.153	670.403	313.184	456.609	647.442	500.97	601.704	329.531	565.542	361.537	394.114	493.737	377.536	502.224	405.738	389.694	402.398	344.391	376.383	393.909	383.788	545.524	370.641	450.967	494.194	376.294	432.731	401.704	501.949
1.04	441.318	516.917	559.166	512.156	450.148	537.471	630.333	486.076	512.501	359	498.666	418.521	510.221	566.345	575.877	397.579	426.567	480.956	496.106	295.517	791.44	739.508	371.289	473.171	624.373	531.867	658.024	333.114	603.948	392.492	396.534	508.869	414.817	502.391	421.055	471.381	379.051	417.068	404.966	365.535	398.303	612.343	402.39	473.15	493.547	428.603	475.046	405.883	576.225
1.105	469.702	570.897	609.69	544.425	460.099	529.769	639.857	486.809	593.424	363	541.236	453.762	538.997	598.332	581.019	427.886	484.186	493.198	511.416	325.354	804.957	752.882	381.271	549.225	595.674	550.586	612.624	387.868	604.778	426.68	422.041	525.705	434.257	533.454	479.709	460.24	379.138	458.732	458.002	470.831	455.262	689.312	402.463	514.948	450.749	477.701	522.753	471.873	638.289
1.17	497.627	619.634	638.184	491.585	526.307	502.233	716.254	545.68	661.244	373	624.76	502.921	561.526	654.575	615.483	435.197	530.426	532.266	534.997	386.656	776.422	701.764	424.218	607.903	541.943	552.532	645.244	484.757	570.7	449.102	455.25	510.211	501.494	610.852	562.849	504.816	451.521	444.167	545.737	538.971	523.453	719.235	479.431	571.518	402.341	497.646	564.906	532.271	754.226
1.235	482.546	620.28	599.595	489.642	611.138	477.138	667.428	548.23	750.359	449	672.699	490.074	492.761	651.224	694.344	483.347	544.236	499.614	592.907	383.581	730.426	663.197	477.377	637.091	496.457	466.152	646.625	557.798	521.659	464.057	443.014	477.836	559.299	656.52	698.715	536.522	536.753	433.903	624.979	586.138	590.153	653.932	526.007	632.851	398.262	530.151	560.545	582.197	736.718
1.3	520.374	599.6	558.691	451.245	648.79	476.712	698.824	578.887	773.031	434	698.099	492.03	463.371	598.496	685.935	558.795	506.301	464.5	618.131	371.43	624.24	609.581	533.802	654.201	469.885	435.587	634.504	594.036	505.533	529.848	491.797	458.545	576.883	704.398	705.261	516.29	569.851	401.732	603.928	607.507	662.321	596.752	611.343	663.008	418.957	541.362	526.987	627.94	740.536
1.365	437.295	553.722	508.928	435.215	642.207	419.681	606.911	577.132	744.148	510	675.438	451.255	455.142	535.712	608.317	593.881	467.775	409.778	644.416	462.537	619.246	570.598	551.128	639.923	472.877	415.549	555.508	566.147	473.955	568.451	474.769	456.346	551.613	720.316	680.852	432.012	625.78	369.858	688.312	576.331	678.159	538.392	606.711	632.103	418.331	604.105	489.351	568.166	663.802
1.43	433.289	541.571	450.766	392.774	598.039	415.833	589.586	537.032	665.789	437	655.529	435.16	440.295	493.829	581.864	586.544	438.574	374.255	639.633	505.857	604.673	545.853	506.325	559.458	403.758	419.101	526.726	515.569	482.508	603.924	394.389	429.667	500.312	781.013	624.389	408.298	655.911	384.655	628.999	527.003	661.636	485.667	572.199	587.819	399.76	686.244	402.907	540.042	636.994
1.495	453.084	572.511	510.238	373.981	567.991	0	535.857	513.964	666.345	461	623.67	401.307	376.155	464.078	545.786	606.855	414.33	337.656	606.704	523.5	512.035	515.229	475.831	570.304	462.94	417.014	533.103	461.692	470.836	585.72	410.796	420.901	498.679	724.387	506.015	401.054	636.542	384.383	567.784	452.677	625.856	480.932	524.445	560.374	408.43	624.538	378.692	515.087	566.617
1.56	413.998	541.725	479.965	396.595	521.468	0	528.138	478.745	625.337	467	584.826	395.266	403.086	459.027	548.001	575.354	439.443	326.271	545.135	539.735	491.61	493.577	513.026	558.137	436.388	415.112	517.596	406.472	453.444	543.176	410.701	415.819	470.809	672.443	480.216	405.531	623.494	389.25	532.39	453.731	540.798	449.804	499.681	549.787	0	568.204	347.399	472.985	552.757
1.625	412.149	448.95	464.99	408.093	516.751	0	486.585	463.931	677.872	404	583.149	381.824	393.461	477.302	515.415	542.911	410.003	335.255	488.128	532.91	497.486	520.631	457.783	536.873	428.775	421.401	503.323	374.246	458.671	483.34	373.324	412.554	452.807	637.369	447.327	384.175	605.746	341.697	487.286	442.684	465.575	456.616	487.902	504.049	0	498.581	363.005	473.371	538.203
1.69	401.204	448.95	430.633	398.181	512.389	0	493.175	442.104	547.281	420	495.016	366.028	401.307	498.642	499.03	504.046	384.542	346.814	452.937	541.247	430.308	498.992	445.693	454.323	452.184	403.325	514.902	380.364	460.039	420.308	361.267	408.878	435.508	620.603	430.754	356.122	550.007	0	436.641	400.235	438.418	419.533	475.761	488.087	0	487.31	372.329	469.184	576.309
1.755	410.686	456.986	460.018	0	476.754	0	463.206	438.845	524.48	416	490.108	385.405	389.136	457.969	535.987	470.084	383.837	337.35	454.19	515.714	435.373	456.089	441.899	443.121	0	0	541.994	369.388	397.95	395.928	367.046	408.553	452.715	557.516	459.823	381.91	520.344	0	440.718	398.799	416.816	427.627	468.21	474.37	0	493.592	385.113	429.517	552.209
1.82	396.828	420.837	451.313	0	508.151	0	419.897	398.062	491.898	375	461.5	382.497	407.719	458.125	476.698	456.072	405.248	322.087	456.51	503.676	465.133	430.579	442.714	450.198	0	0	509.407	390.631	382.89	374.592	380.458	404.35	466.135	555.185	435.648	382.615	472.748	0	430.307	379.219	437.169	437.583	428.032	448.756	0	479.153	365.906	422.917	511.766
1.885	397.487	423.709	469.938	0	470.687	0	417.365	362.747	481.758	409	454.065	0	405.859	444.766	494.062	418.979	0	298.58	425.841	439.197	432.478	456.268	452.522	460.943	0	0	479.685	364.488	422.925	397.858	372.991	417.522	435.856	534.531	454.407	339.681	421.766	0	402.003	375.557	0	438.631	447.786	439.011	0	465.774	349.337	390.75	493.788
1.95	360.779	0	436.355	0	471.299	0	437.687	0	502.179	381	454.604	0	388.058	439.297	491.873	420.848	0	320.862	418.312	438.161	446.864	0	426.813	455.442	0	0	509.358	369.634	404.258	370.49	377.976	407.881	436.452	520.065	420.751	347.218	411.651	0	349.841	0	0	389.261	454.654	457.306	0	460.025	342.099	0	518.605
2.015	0	0	403.049	0	447.656	0	413.906	0	481.93	376	0	0	394.529	423.887	452.395	428.768	0	346.714	449.319	465.946	438.735	0	431.1	437.137	0	0	557.083	0	0	375.291	0	397.792	427.74	0	430.67	0	396.105	0	346.534	0	0	371.121	434.342	440.254	0	447.788	347.036	0	498.381
2.08	0	0	391.623	0	430.362	0	435.144	0	458.191	397	0	0	390.222	421.857	479.859	0	0	0	437.304	444.238	451.963	0	0	0	0	0	508.513	0	0	351.239	0	429.852	419.176	0	421.048	0	401.373	0	375.909	0	0	397.991	0	408.706	0	408.695	358.354	0	0
2.145	0	0	0	0	0	0	415.762	0	471.663	365	0	0	0	0	471.182	0	0	0	418.175	404.638	459.442	0	0	0	0	0	0	0	0	356.603	0	0	0	0	414.598	0	404.948	0	370.492	0	0	0	0	411.234	0	400.828	356.055	0	0
2.21	0	0	0	0	0	0	397.113	0	473.841	368	0	0	0	0	485.823	0	0	0	421.259	0	433.103	0	0	0	0	0	0	0	0	376.499	0	0	0	0	408.442	0	402.059	0	374.383	0	0	0	0	0	0	411.1	334.283	0	0
2.275	0	0	0	0	0	0	0	0	453.21	0	0	0	0	0	0	0	0	0	380.564	0	0	0	0	0	0	0	0	0	0	0	0	0	0	0	398.925	0	394.011	0	375.958	0	0	0	0	0	0	425.24	328.361	0	0
2.34	0	0	0	0	0	0	0	0	0	0	0	0	0	0	0	0	0	0	0	0	0	0	0	0	0	0	0	0	0	0	0	0	0	0	388.866	0	392.765	0	326.578	0	0	0	0	0	0	0	0	0	0
2.405	0	0	0	0	0	0	0	0	0	0	0	0	0	0	0	0	0	0	0	0	0	0	0	0	0	0	0	0	0	0	0	0	0	0	0	0	372.213	0	340.565	0	0	0	0	0	0	0	0	0	0
0	4848	12483	8123	5235	5827	3535	5316	8908	3221	2701	6131	7641	2450	6830	16160	3828	3742	4276	7164	2836	13778	9735	5835	9280	4902	6255	9162	3715	4730	5061	5224	8493	5208	6188	4588	4582	2456	6837	3841	4260	3575	8199	7320	6371	11289	6659	3459	4224	6714
0.065	5474.52	13861.4	8972.07	6178.37	6740.44	4199.82	6602.81	11990.6	3818.71	3026	6675.31	9159.54	2755.79	7674.12	18930.5	4147.86	4098.48	4732.92	8112.05	3322.27	15536.7	11193.3	6691.89	10826.8	6112.9	7283.31	11008.8	4205.74	5108.98	5539.81	6000.84	9107.9	6036.85	7169.92	5690.38	5704.78	2768.54	7999.64	4628.35	4632.85	4121.2	9460.57	8451.17	7286.84	13418	7806.16	3973.91	5174.42	8406.36
0.13	6241.27	15031.6	10048.4	7703.28	7635.53	5348.75	7587.65	15748.2	4487.87	3572	7369.13	10222.6	3137.28	8904.08	23157	4537.05	4427.21	4989.68	9462.92	3948.05	17810.6	13209	7521.25	12898.9	7755.33	8407.54	13603.8	4996.19	5767.83	6351.69	7276.15	10177.4	6870.56	8255.46	7163.62	7560.64	3002.36	9310.48	5564.88	5518.05	4807.42	11570.6	9899.97	8630.46	15863.8	9335.52	4945.27	6318.12	10505.9
0.195	7087.79	16550.5	11495.5	9761.72	9669.11	6895.74	9056.57	19997.9	5086.38	3830	8219.17	12700.5	3670.8	10576.8	28489.1	5105.12	5342.21	5903.82	10758.7	4763.99	20520.1	16024.6	8786.24	15112.1	10239.3	9990.9	17689.9	5836.22	6500.89	7313.11	9240.02	11558.9	7824.65	9459.22	8847.09	9756.09	3694.95	11312.2	6751.07	6412.7	5628.46	14070.6	11830.9	10329.7	18433.6	10906.2	6079.12	8082.06	13558.2
0.26	9132.58	18571.6	13726.5	12548.7	12174.5	9348.68	11685.8	24497.2	6122.6	4616	9384.45	15453.3	4057.36	12767.5	35254.1	5823.22	6515.98	7248.49	12352.2	6013.11	24282.8	19087.6	10460.6	17342.7	13593.1	12367.3	22953.4	7263.83	7577.96	8250.31	11678.1	13676.1	8935.79	10585.9	10592.8	12756.1	4557.72	13954.6	8222.09	7483.68	6753.82	16790.6	14189.2	12554	20622.2	13045.3	7755.79	10660.4	17450.1
0.325	11807	20933.7	16373.7	16622.1	15650.5	12452.1	16335.4	28809.6	8012.63	6064	11272.5	20198.2	4521.07	15183.8	42453.6	6893.19	7889.96	9242.45	14878.4	7375.65	28449.3	22354.7	12634.2	19784.1	18645.4	15657.6	28829.2	9433.25	9860.31	9508.52	14647.6	15774.3	10378.6	11810.4	13041.2	15641.4	5597.4	17300.1	10264.4	9177.26	8126.27	19835.6	17059.9	15180.6	22994.7	15403.6	9708.51	14076.4	21968.2
0.39	15432.9	23700	19699.8	21764.8	19036	16518.8	22641.6	32808.2	11613.2	8232	13862.2	25919.8	5473.31	18059.4	50336.5	7736.63	9746.15	12250.1	17904.1	9238.21	33536.8	26034	15826.3	22363.2	25089	20310.5	36872.8	12943.9	12550.4	10628.9	17681.2	18916.4	11860.4	13573.9	15942.6	18202.8	6918.94	21207.2	12599.9	12155.9	10092.4	23325.1	20125.4	18690.3	25139.7	18834.7	12195.6	17795.2	27114.5
0.455	19197	26899.2	23466.5	27457.7	23089.4	20859	30075.7	36650.2	17383	11343	17840.1	32308.9	7039.27	21602	56945.2	9268.95	11684.5	16286.4	21538.9	11796.9	38859.1	29718.2	20427.2	25084.3	32503.9	26044.2	43279.1	17674.5	16058.6	12212.7	21044.3	23419.5	12652	16003.4	19082.9	20197.6	9034.75	25711.2	16168.5	17092.8	12473.8	27770.4	23220.4	22870.2	26798.4	22752.2	15326.5	22344.5	31425.8
0.52	24125.8	31194.2	26951.2	33359.4	26293.9	25598.3	37112.2	39251.3	25305.1	15796	23294.7	37819.4	9239.28	25574	61556.4	10743.1	13875.3	20244.8	26419.8	14779.4	44207.2	33498.8	26012.2	28905.2	40142.5	31867.8	50667.4	23825.4	19774.1	14312.7	24351.1	28195.9	14436.4	20170.6	21646.8	22016.4	11793.9	29692.4	20041.1	23896.4	15634.3	31663.2	26921.5	28012.4	28764.2	26706.1	18130.1	26529.7	35728.8
0.585	28683.7	35234	30275.8	38875.2	29420.3	29440.9	43228.1	41171.9	33923.5	20851	29851.6	41697.4	12865.4	30109.7	65014.9	13262	16716	23664.8	31480.7	17688.2	50258.3	37105.1	31237.9	32813.3	47057.5	37092	55632.6	30446.6	23405.2	16968.8	27140.7	33099.7	16027.7	25882.9	24283.5	23060.4	15887.3	32876.8	24790.4	31372.3	18814.7	35905.6	30472.6	33723.2	30397.5	30580.5	22263.4	30902.3	39895.7
0.65	31301.2	39171.3	32875.3	42991.4	31935.1	32267	45429.9	42315.2	42350.4	25625	36843.2	43170.3	17417.8	34789.7	65526.1	16343.3	20202.3	26515.3	37536.6	20349.5	56312.4	40325	35735.2	36284.5	52464.5	41498.8	58454.6	36383.7	26242.5	20215.6	29741.2	38599.5	17666.8	33072.9	26097	24314.4	21281.6	34931.1	29297.2	38622.5	21962.3	40428	34434.5	39472.6	31677	34008.6	26555.6	34367.6	43597.9
0.715	33335.9	42783	35743.4	45958.7	33929	33438.9	46804.7	43145.5	48652.9	30257	43166.5	44243.1	22337.8	38925.2	65535	20132.2	23934.3	28102.2	44094.4	22405.2	63249.5	42874.9	38860.5	39429.2	55262.3	44329.8	59299.1	41666.8	27819.3	24428.2	31795	42180.4	19290.9	41023.6	27336.9	24365.8	26704.6	36663.5	33531.2	43334.5	24677.4	42771.2	37135.6	46438.5	32691.8	36777.7	30416.1	36616.9	46454.3
0.78	35260.9	47066.7	37098.3	46201.2	35923.9	33026.9	48417	43130.3	52224.9	34021	48109.7	44196.2	26410.2	42817.9	65535	24598.3	26801.2	28102.7	50123.3	24302.7	65497.6	44193.5	40351.6	41421.3	55089.7	45327.5	58742.6	44934.4	28072.3	29055.9	32659.2	44692.2	20986.9	48843	28487.3	24296.6	31418.9	36997.7	37508.1	46688.5	27021.7	44461.7	38921.3	52086.5	32676.5	38142.1	33994.2	38194.4	48973.1
0.845	34241.7	51817.5	37812.5	45211.2	37433.3	30917.1	49309.5	42767.1	55121	36002	51119.5	42517.6	29523.4	45504.6	64031.4	30388.8	28274.1	28334.2	54746.5	25720	65535	45098.7	41456.2	41896.7	51697.3	44776.1	56874.6	47784.8	27562.4	33609.9	32587.1	45873.3	22510	55618.2	29324.6	23395.4	34958.9	37080	39946.5	49878.2	28250.7	45657.8	40126.2	57992	31899.6	38823	36550	39565.1	51347.9
0.91	32547.6	55522	37770.6	41890	38717.5	28241.3	48707.7	42290.7	57593.9	37193	52531.4	39467.2	30599.4	47509.5	59931.8	35450.4	28951.8	27472	57796.8	27102.6	65535	45093.3	41592.4	41011.3	46846	41247.1	53693.9	49629.1	25937.9	37615.9	31909	45734.5	23940.9	61226.5	29512.5	21959	37027.3	37096.5	41728	51818.9	28842.1	45332.2	40401.9	61693.2	30162	38515.6	38308.3	38862.9	50537.8
0.975	29191	57392.7	36206.8	37115.2	38652.4	25056.4	47851	41343.3	58459.5	37994	52857.2	34891.4	29809	48171	55864.1	40775.6	28572.8	25689.5	58979.6	28759.1	65535	43940.2	41343.9	38784.5	39974.8	37366.3	50282	51148.8	23110	40479	30354.4	43658.4	25295.8	64663.9	29333.5	19435.9	37750.6	36201	42849.9	53082.7	28710.2	43712.4	39556	63350.2	28204.4	37280	38930.8	37004.6	49348
1.04	25668.6	58154.3	34213.7	32666.1	38051.8	22164.6	43386.1	40036.4	57752.2	37266	52226.9	29624.6	28002	47825.6	48927.3	44794.4	26611.7	23187.2	58843.6	30634.4	65501.1	42656.5	40956.5	36471.9	32761.9	32146.1	45306.6	51425.6	20244.7	41809.6	27933.9	40536.4	26434.4	65378.1	28379.6	16741.2	38256.6	34417.9	42312	53673.4	28040.8	40549.1	38037.9	62738.2	25630.8	35063	38246.7	34298.5	46194.7
1.105	21781	56581.6	32011	27756.9	36456.8	20115.1	37869.6	37423.8	54002.4	36186	50239	25158.9	25727.5	46186.2	43033.3	47515	23603.8	19719.3	56915.3	31558.3	63953.5	41412	39252.7	33707.8	26577.3	27187.5	41181.4	50468.3	17499.2	41352	24944.6	36660.7	27339.5	63901.4	27172.2	14210.6	38001.3	31713.8	40376	51078.4	27016.5	37070.3	35374.2	60747.8	22696.1	32055.5	35943.8	30712.8	42605.5
1.17	18809.2	53481.2	29697.4	23770.2	34123.5	18482.5	32303	34690.1	47842.6	33945	46296.5	21784	23250.3	44257.6	38784.5	48616.7	20482.7	16394.2	53570	31697.8	58651.1	39782.8	36630.9	30512.8	21749	22709.4	37667.1	48020	14652.2	39122	21838.1	32904.6	27811.2	59666.1	25637.5	11909.8	36542.4	29260.7	37436.3	46246.1	25667.3	33339.2	33107.4	57101.9	19631	28888.3	32553.8	27704.2	38548.1
1.235	16417.6	49745.3	27174.6	20829.4	30719.1	17198.2	27521	32169.7	40921.7	30516	41390.8	19630.1	21634	41691	34229.6	48066.8	17458.3	14210.4	48765.2	31979.8	54402.5	37734.8	33468.5	27783.3	18094	18842	34710.6	43733.1	12855.7	35213.9	19015.6	29027.8	28075.8	53903.9	23024.4	10343.8	33330.1	25905.1	33381.2	39811.3	23697.7	29310.9	30120.3	52759.6	16584.1	25637.3	28288.3	24298.4	34628
1.3	14570.2	45081.6	24669.5	18544.8	27551.7	16377.5	23067.8	29581.3	33521.8	25516	35591.3	18147.7	20399.4	38572.7	31326.3	46345.8	15534.7	12621.9	42886	30614.6	50755.6	35411.5	30293.7	24893.8	15158.7	16502.5	32597.9	38500.6	11895.6	31054.3	17136	25708.8	27600.4	47504.6	20911	9057.84	28862.8	23224.3	29332.4	33000	21345.1	25735.2	27119.8	46911.2	14219.2	22702.8	23620.7	21334.8	31473.7
1.365	13042.2	39628.3	23066.3	16859.2	24629.4	15936.9	20657.4	27544.6	27782.2	20784	30451.3	16714.9	18985.3	35722.1	28442	43540.6	13526.7	11548.4	37333.3	28686.2	47754.4	32958.3	27478.8	22429.3	13161.6	14991.9	31019.2	32922.1	11134.5	26407	15128.9	22863.7	27211	40905.9	18910.7	8213.09	24190.9	20909.4	24983.8	26846.1	19298.4	22699	25145.8	41139.5	12368.7	20033.8	19645.3	18944.5	29103.6
1.43	12164.4	35671.5	21936.1	15729.6	22396.9	15404.6	18600.9	25359.8	23573.4	16117	25950.7	15811	17484.6	33241.8	26726	39791.1	11917	10914.9	31861	26146.3	45220.5	30361.7	25299.5	20369.7	11711.5	13687.6	29943.7	28143.4	10519	22515.9	13678.3	20583.2	26379.9	35484.3	17321.2	7442.83	20182.6	18687.1	20529.6	21684.4	17074.7	20096.9	22936.2	35794.8	10345.9	17857.1	15968.9	17352.1	27958
1.495	11606.1	31085.5	20923.9	14933.2	20576.1	0	17066.3	23063.6	20787.5	13008	22712.9	14889.8	15955.2	30888.3	24941.7	35523.4	10790.9	10611	27755.4	23810	41727.1	27725.9	23533.6	18767.2	10260.5	12762.4	29380.2	23813.6	10780.1	19514.3	12452.3	18883.7	25344.7	31248.8	16151.4	6736.1	17682.8	17182.6	17023.1	17840.9	14743.6	18574.2	21075	30855.9	9180.35	15999.1	12834.6	16238.8	26434.2
1.56	11066.5	27213.9	19910.3	14221.6	19139.1	0	15276	20941.9	18849.9	10549	20621.1	13915.5	13611.6	29344	23173.1	32446.3	9753.4	10323	25016.1	22013	37594.2	25862.7	21885.2	17299.3	9360.08	12276.6	28760.5	20967.8	10397.5	16256.1	11194.3	17355.8	24432.5	27473	14756.3	6559.01	16436.4	16173.6	14413.5	15316.9	13004.2	16959.4	19030.3	26804.1	0	14599.8	10491.4	15568.8	25515.1
1.625	10825.8	24237.1	19690	13262.8	17852.6	0	14339.9	18966.7	17014.6	8554	19317.1	13411.6	11679.7	27468.1	21943.7	29205.8	9052.28	10049.4	22443.6	19835.6	33332.2	23708.3	20400	16080.1	8595.68	12167.1	28060.2	18556	10062.8	14235	10600.9	16153.8	23287.1	24873.4	13807.8	6189.7	16238.9	15809.9	12119.1	13385.2	11526.3	15592.1	18084.3	23143.5	0	13686.2	8628.14	14806.7	25404.7
1.69	10562	21570.2	18848.1	12589.2	16657.9	0	12978.4	17043.2	15632.8	7794	18714.5	12996.6	10461.9	26475.2	20828.1	26058.7	8423.36	9855.68	20191.2	18558.9	29297.7	22643.3	18890.4	15207.6	8113.09	11418.7	27808.1	16594.3	9958.64	12756.1	9717.68	15109.5	22143.4	22430.7	13008.4	5945.99	15730.5	0	10755.3	12275.8	10379.7	14451.2	16913	20114	0	12809.8	7240.85	14248.6	24308.1
1.755	10415.4	19146.2	18315.7	0	15682	0	12115.3	15332	14753.8	7142	18068.5	12788.7	9869.42	24752.4	19570.1	24121.6	7808.34	9769	18595.6	16845.7	26050.1	21434.5	18344.5	14177.2	0	0	26953.7	14957.6	9935.42	11397.1	9077.11	14340.6	21128	20485.6	12309	5984.65	15361.1	0	9571.18	11292.2	9239.55	13471.8	15852.2	17844.5	0	12063.4	6294.19	13782.4	24279.9
1.82	10354	17664.9	17459.2	0	15059.2	0	11465.7	13820.2	13867.2	6966	17504.3	12767.9	9398.84	23981.2	18733	22092.8	7302.41	9695.99	16984.7	15939.2	23217.1	19997.2	17712.4	13163.6	0	0	26034.9	13392.5	9585.36	10254.2	8760.51	13680.1	19952.3	19057.4	11827.1	5814.01	13878.8	0	8562.74	10842.7	8554.93	12807.3	15434.3	15813.6	0	11663.5	5584.79	13617.4	24066.9
1.885	9655.15	16202.7	16871.5	0	14417.5	0	10682.5	12368.4	12926	6781	17230.7	0	9222.21	22929.7	18193.9	20297.6	0	9799.82	15635.4	15160.4	20859.5	18581.8	17125.2	12370.2	0	0	25678.7	12194.1	9486.27	9419.11	8413.69	12944.7	18624.7	17417.1	11277.4	5669.89	12322	0	7738.24	10577.6	0	11886.5	14439.1	14208	0	11417.6	5096.31	13312.4	23608.8
1.95	9837.06	0	16422.9	0	13906.7	0	10490.6	0	12394.7	6673	16884.1	0	9505.25	21881.7	17398.5	18768.2	0	9707.8	14739.3	13968.2	18931.4	0	16601.4	11331.3	0	0	25072	11093.1	9312.51	8494.7	8018.04	12365.8	17894.6	16121	10597.2	5566.1	10843	0	6896.02	0	0	11457	13788.2	12819.7	0	11195	4740.26	0	23227.6
2.015	0	0	15830.8	0	13355.4	0	9836.06	0	11957.4	6637	0	0	9989.49	21065.1	17053.2	17077.6	0	9774.12	13878.1	13402.7	17199.6	0	16156.2	10447.4	0	0	24391.9	0	0	7898.12	0	11676.7	17388.9	0	10250.6	0	9656.09	0	6418.27	0	0	11233	13656.1	11500.6	0	11169.9	4362.92	0	22861.2
2.08	0	0	15049.6	0	12916.7	0	9284.44	0	11556.7	6565	0	0	10301	20259.2	16357.1	0	0	0	13030.7	13107.6	15512.3	0	0	0	0	0	23737.5	0	0	7463	0	11144	16638.7	0	9828.58	0	9001.67	0	6027.57	0	0	10715.7	0	10450.4	0	10968.3	4278.42	0	0
2.145	0	0	0	0	0	0	8821.98	0	10803	6674	0	0	0	0	15648.9	0	0	0	12243.1	12291	13886.1	0	0	0	0	0	0	0	0	6922.44	0	0	0	0	9449.34	0	8666.67	0	5391.77	0	0	0	0	9405.92	0	10854.8	4157.52	0	0
2.21	0	0	0	0	0	0	8756.74	0	10032	6419	0	0	0	0	14875.4	0	0	0	11487.8	0	12693.4	0	0	0	0	0	0	0	0	6340.33	0	0	0	0	9313.07	0	8498.43	0	4945.57	0	0	0	0	0	0	10732.9	4059.81	0	0
2.275	0	0	0	0	0	0	0	0	9337.98	0	0	0	0	0	0	0	0	0	10855.3	0	0	0	0	0	0	0	0	0	0	0	0	0	0	0	9175.99	0	8281.28	0	4581.09	0	0	0	0	0	0	10760.5	3969.15	0	0
2.34	0	0	0	0	0	0	0	0	0	0	0	0	0	0	0	0	0	0	0	0	0	0	0	0	0	0	0	0	0	0	0	0	0	0	9018.61	0	8332.92	0	4172.41	0	0	0	0	0	0	0	0	0	0
2.405	0	0	0	0	0	0	0	0	0	0	0	0	0	0	0	0	0	0	0	0	0	0	0	0	0	0	0	0	0	0	0	0	0	0	0	0	8370.67	0	3973.82	0	0	0	0	0	0	0	0	0	0
0	0.516936	0.557813	0.459115	0.440832	0.357589	0.381416	0.38813	0.495779	0.291062	0.503922	0.416846	0.538852	0.452339	0.450674	0.41334	0.484465	0.529182	0.471569	0.428295	0.445268	0.36151	0.389171	0.542524	0.438703	0.395402	0.523047	0.401201	0.409066	0.472901	0.412304	0.542907	0.555445	0.379626	0.444295	0.287837	0.555429	0.359805	0.595119	0.382094	0.348967	0.345052	0.4185	0.402393	0.472091	0.714294	0.415304	0.463794	0.390165	0.315555
0.065	0.510544	0.530219	0.423719	0.487029	0.392888	0.464157	0.437156	0.512211	0.337791	0.490196	0.415596	0.5296	0.477274	0.394937	0.411728	0.444475	0.538987	0.479927	0.465536	0.405369	0.372318	0.361274	0.496462	0.440028	0.38845	0.515894	0.424319	0.382409	0.544587	0.387454	0.541522	0.602469	0.411413	0.38046	0.323547	0.552674	0.370953	0.553903	0.349061	0.373884	0.395437	0.398982	0.450048	0.444216	0.62779	0.378441	0.503418	0.418847	0.35751
0.13	0.574712	0.5386	0.414312	0.497896	0.364674	0.466602	0.472767	0.499263	0.369239	0.45098	0.442628	0.622929	0.495347	0.456214	0.433354	0.51593	0.528835	0.494533	0.380895	0.41303	0.363227	0.398377	0.518185	0.447547	0.409783	0.48877	0.464076	0.422596	0.498809	0.44146	0.571589	0.608672	0.423391	0.448813	0.342947	0.562093	0.37533	0.56846	0.367185	0.369507	0.418476	0.365807	0.453827	0.482426	0.677455	0.428184	0.480067	0.403554	0.343889
0.195	0.564629	0.548586	0.431388	0.479353	0.432055	0.480024	0.411939	0.534647	0.374914	0.545098	0.467192	0.66486	0.506286	0.411449	0.478166	0.475562	0.504888	0.514373	0.453713	0.494913	0.347055	0.403156	0.516082	0.43147	0.408135	0.511103	0.453363	0.431425	0.525983	0.451317	0.598684	0.594373	0.423245	0.435401	0.371115	0.56468	0.381024	0.628578	0.388748	0.395719	0.383873	0.430225	0.448951	0.464525	0.67278	0.425019	0.44021	0.417925	0.340942
0.26	0.541739	0.566651	0.456177	0.470616	0.417955	0.469324	0.414504	0.492324	0.384146	0.486275	0.458674	0.619763	0.52911	0.427821	0.472334	0.459622	0.556378	0.486712	0.415132	0.475812	0.383052	0.416518	0.525555	0.486751	0.44693	0.534136	0.46641	0.430657	0.506877	0.430228	0.639797	0.51398	0.439595	0.391255	0.356505	0.576219	0.437017	0.590212	0.418456	0.438667	0.389826	0.477733	0.433392	0.4379	0.648954	0.474235	0.491662	0.442015	0.374166
0.325	0.626753	0.579217	0.504392	0.547888	0.410464	0.455368	0.45514	0.548401	0.385367	0.496078	0.473053	0.619282	0.561504	0.438289	0.497909	0.462369	0.58016	0.505509	0.457081	0.438365	0.405789	0.430939	0.550819	0.485255	0.472518	0.546075	0.532751	0.465147	0.520584	0.428842	0.668166	0.577349	0.447732	0.438222	0.370684	0.544391	0.438082	0.634351	0.418073	0.42811	0.374607	0.409694	0.488847	0.455435	0.653602	0.473371	0.514411	0.419386	0.398284
0.39	0.566944	0.591065	0.552023	0.641589	0.434839	0.465082	0.43066	0.574516	0.383774	0.566667	0.469773	0.635734	0.512293	0.42426	0.474762	0.451477	0.545186	0.538999	0.477826	0.52591	0.423282	0.476699	0.559503	0.535748	0.498601	0.592483	0.48406	0.479454	0.549754	0.473831	0.599022	0.6459	0.412649	0.437347	0.382253	0.560592	0.418296	0.629433	0.410394	0.421914	0.423451	0.416951	0.468999	0.49963	0.667683	0.419086	0.554898	0.421047	0.375047
0.455	0.595183	0.60217	0.531803	0.592978	0.454008	0.502139	0.521488	0.57785	0.381889	0.580392	0.474577	0.569513	0.5163	0.427893	0.510853	0.476494	0.595365	0.58353	0.498877	0.519345	0.471337	0.501278	0.561476	0.523605	0.488419	0.586536	0.572617	0.486368	0.576547	0.503419	0.613802	0.645254	0.426957	0.45046	0.4031	0.533736	0.418458	0.626475	0.417722	0.431363	0.419643	0.454529	0.494276	0.453052	0.69582	0.441729	0.548985	0.468747	0.443843
0.52	0.623988	0.656159	0.522743	0.65603	0.488784	0.521131	0.52662	0.583489	0.391551	0.603922	0.516167	0.635062	0.514256	0.483929	0.578657	0.470961	0.614217	0.549278	0.493003	0.469656	0.479688	0.505677	0.557246	0.534062	0.495125	0.580951	0.630898	0.512624	0.553479	0.548882	0.622739	0.604778	0.49605	0.500651	0.415364	0.629262	0.454019	0.633668	0.367017	0.457978	0.445822	0.388938	0.468676	0.526626	0.690636	0.439765	0.542257	0.469537	0.401853
0.585	0.642546	0.610179	0.543594	0.630096	0.499456	0.52211	0.572815	0.623692	0.422798	0.609804	0.534418	0.676556	0.562984	0.550055	0.563041	0.465091	0.582424	0.54888	0.521894	0.526926	0.441322	0.546063	0.548419	0.531612	0.495493	0.636468	0.67974	0.5166	0.54171	0.499386	0.69743	0.647618	0.499829	0.484731	0.425087	0.639139	0.449886	0.701244	0.410235	0.496605	0.460761	0.444713	0.541303	0.562239	0.755533	0.455227	0.578539	0.516455	0.411674
0.65	0.660194	0.639292	0.532212	0.638167	0.503507	0.582301	0.557946	0.638204	0.418851	0.670588	0.533633	0.674991	0.558272	0.512837	0.650291	0.544117	0.59291	0.577247	0.513164	0.56661	0.516765	0.559382	0.55566	0.568944	0.533639	0.659678	0.677235	0.52281	0.550443	0.494761	0.729541	0.713334	0.496706	0.482071	0.460018	0.535268	0.456623	0.711755	0.451627	0.5147	0.452329	0.481211	0.554947	0.562431	0.821335	0.467152	0.576191	0.504217	0.431762
0.715	0.694076	0.667511	0.591699	0.679265	0.523937	0.644956	0.65152	0.705307	0.467248	0.64902	0.522472	0.689524	0.595903	0.579446	0.621497	0.504349	0.601191	0.605466	0.561809	0.59236	0.567725	0.661254	0.62021	0.593012	0.58765	0.657528	0.642668	0.536366	0.604147	0.524826	0.754061	0.738629	0.513335	0.534558	0.47593	0.581711	0.493442	0.773266	0.469694	0.473012	0.474552	0.48152	0.52931	0.583705	0.753587	0.486828	0.616885	0.517952	0.478917
0.78	0.664197	0.668521	0.598248	0.6997	0.59805	0.696475	0.730875	0.74216	0.532914	0.664706	0.549381	0.737444	0.62798	0.586396	0.592617	0.575612	0.594841	0.645775	0.595662	0.631059	0.614343	0.613384	0.620954	0.609913	0.667749	0.710647	0.756869	0.549093	0.639355	0.51532	0.739523	0.70048	0.56313	0.578135	0.452267	0.658441	0.518435	0.786355	0.519145	0.54886	0.49709	0.487667	0.56081	0.547512	0.913536	0.526931	0.66239	0.546995	0.514578
0.845	0.748575	0.723933	0.712924	0.766477	0.590903	0.742468	0.791378	0.730811	0.526566	0.647059	0.627296	0.754854	0.648307	0.616284	0.708224	0.572845	0.619619	0.68809	0.569658	0.52886	0.724282	0.712031	0.670002	0.633322	0.775069	0.723712	0.820289	0.586168	0.720476	0.554725	0.733298	0.771944	0.567585	0.577447	0.498933	0.65312	0.563018	0.725713	0.534952	0.5432	0.536044	0.565152	0.580581	0.581492	0.947164	0.542752	0.710021	0.565882	0.615965
0.91	0.807825	0.725916	0.752753	0.776794	0.645724	0.85381	0.783446	0.777459	0.525869	0.666667	0.626417	0.756453	0.737668	0.673442	0.624912	0.523237	0.760927	0.768958	0.636533	0.529891	0.793523	0.817358	0.615304	0.662272	0.898321	0.853151	0.856434	0.568998	0.82205	0.560993	0.757225	0.876629	0.568627	0.567416	0.506832	0.720112	0.572957	0.751003	0.535888	0.560848	0.548535	0.64695	0.521812	0.638258	0.946345	0.533028	0.728105	0.605094	0.639288
0.975	0.805536	0.742503	0.694859	0.846251	0.636311	0.928487	0.814095	0.789042	0.594646	0.629412	0.623069	0.833682	0.768974	0.723926	0.738666	0.580348	0.788766	0.868032	0.729903	0.592968	0.948067	0.890449	0.56826	0.697964	1	0.906681	0.91441	0.554732	0.935123	0.598647	0.801375	0.93919	0.654441	0.643042	0.575302	0.726334	0.613495	0.750746	0.54682	0.648402	0.565926	0.758478	0.606273	0.680183	1	0.548338	0.766023	0.639717	0.665515
1.04	0.848078	0.833361	0.876183	0.940728	0.693827	1	0.880041	0.839673	0.662976	0.703922	0.71432	0.83218	0.908633	0.86521	0.829383	0.655147	0.78379	0.903601	0.769854	0.545993	0.983208	0.982236	0.673689	0.723281	0.964369	0.962599	1	0.560764	0.998628	0.649903	0.806296	0.967974	0.719066	0.643256	0.59702	0.878587	0.5779	0.909176	0.588347	0.601697	0.58733	0.851381	0.658207	0.713641	0.998691	0.624564	0.840929	0.646372	0.763995
1.105	0.902624	0.920386	0.955351	1	0.709165	0.98567	0.893338	0.84094	0.767659	0.711765	0.7753	0.902253	0.959879	0.914077	0.836788	0.705088	0.889662	0.926601	0.793612	0.601119	1	1	0.691801	0.839536	0.920042	0.996478	0.931006	0.652937	1	0.706513	0.858161	1	0.752764	0.683028	0.680186	0.857821	0.578033	1	0.665399	0.775022	0.67132	0.958396	0.658326	0.776684	0.912089	0.69611	0.925381	0.751462	0.846283
1.17	0.956287	0.998959	1	0.902943	0.811213	0.934437	1	0.942636	0.855391	0.731373	0.894945	1	1	1	0.886424	0.717135	0.974625	1	0.830204	0.71438	0.964551	0.932104	0.769727	0.92923	0.837053	1	0.980578	0.81604	0.943652	0.74364	0.925687	0.970527	0.869317	0.782128	0.798072	0.940905	0.688388	0.968249	0.792863	0.887185	0.771874	1	0.784226	0.862008	0.814136	0.725174	1	0.847646	1
1.235	0.927306	1	0.939533	0.899375	0.941966	0.887747	0.931831	0.947041	0.970671	0.880392	0.963615	0.974455	0.877539	0.994881	1	0.796479	1	0.938655	0.920069	0.708699	0.90741	0.880878	0.866182	0.973846	0.766798	0.843665	0.982677	0.938997	0.862563	0.768403	0.900807	0.908943	0.969519	0.840601	0.990718	1	0.818332	0.945875	0.907988	0.964825	0.870228	0.909205	0.860412	0.954515	0.805882	0.77254	0.99228	0.927154	0.976787
1.3	1	0.96666	0.875439	0.828847	1	0.886954	0.975665	1	1	0.85098	1	0.978345	0.8252	0.914328	0.987889	0.920805	0.930297	0.872684	0.959211	0.686249	0.775495	0.809663	0.968563	1	0.725756	0.788347	0.964257	1	0.835898	0.877342	1	0.872248	1	0.901903	1	0.96229	0.868793	0.875744	0.877404	1	0.976646	0.829704	1	1	0.847758	0.788877	0.932876	1	0.981849
1.365	0.840348	0.892697	0.797463	0.799403	0.989853	0.780844	0.84734	0.996968	0.962637	1	0.967539	0.897268	0.810545	0.818412	0.876103	0.978621	0.859508	0.769874	1	0.854577	0.769291	0.757885	1	0.978175	0.730377	0.752081	0.844206	0.953052	0.783684	0.941262	0.965376	0.868065	0.956196	0.922284	0.96539	0.805208	0.954062	0.806262	1	0.948682	1	0.748562	0.992423	0.953387	0.846491	0.880306	0.866252	0.904809	0.88011
1.43	0.832649	0.873107	0.706326	0.721447	0.921776	0.773685	0.823152	0.927697	0.861271	0.856863	0.93902	0.865265	0.784104	0.754427	0.838005	0.966531	0.805853	0.703135	0.992578	0.934614	0.751187	0.725018	0.918707	0.855178	0.62362	0.75851	0.800466	0.867909	0.797827	1	0.801935	0.817316	0.867268	1	0.88533	0.761009	1	0.838518	0.913828	0.867485	0.975636	0.675255	0.93597	0.886594	0.808913	1	0.713228	0.860022	0.844566
1.495	0.870689	0.922988	0.799516	0.686928	0.875462	0	0.748138	0.887849	0.86199	0.903922	0.893383	0.797952	0.66988	0.708976	0.786046	1	0.761306	0.634375	0.941479	0.967211	0.636102	0.684342	0.863377	0.871757	0.715029	0.754733	0.810157	0.777212	0.778527	0.969857	0.835296	0.800641	0.864437	0.927497	0.717486	0.747507	0.97047	0.837925	0.824893	0.745139	0.922875	0.668672	0.857857	0.845199	0.826457	0.910082	0.670363	0.820281	0.751256
1.56	0.795578	0.873356	0.752079	0.728466	0.803755	0	0.737361	0.827009	0.808942	0.915686	0.837741	0.785941	0.71784	0.70126	0.789236	0.948091	0.807449	0.612985	0.845936	0.997206	0.610728	0.655583	0.930865	0.853158	0.674019	0.75129	0.786591	0.684255	0.749769	0.899411	0.835103	0.790974	0.816126	0.860988	0.680905	0.755852	0.950577	0.848535	0.773472	0.746874	0.79745	0.625392	0.81735	0.829231	0	0.827991	0.614968	0.753233	0.73288
1.625	0.792025	0.723786	0.728614	0.749585	0.796484	0	0.679347	0.801419	0.876901	0.792157	0.835339	0.759213	0.7007	0.729178	0.742305	0.894631	0.753355	0.629864	0.757473	0.984597	0.618028	0.691517	0.830629	0.820655	0.66226	0.762673	0.764901	0.630006	0.758412	0.800332	0.759102	0.784763	0.78492	0.81608	0.634272	0.716047	0.923519	0.744873	0.707943	0.72869	0.686528	0.634863	0.798082	0.760246	0	0.726536	0.642594	0.753848	0.713583
1.69	0.770992	0.723786	0.674779	0.731379	0.789761	0	0.688548	0.763714	0.707968	0.823529	0.709091	0.727804	0.714672	0.76178	0.718707	0.830587	0.706572	0.65158	0.702864	1	0.534573	0.662776	0.808692	0.69447	0.698416	0.729958	0.782497	0.640305	0.760674	0.695962	0.734586	0.777771	0.754933	0.794613	0.610772	0.66376	0.838539	0	0.634365	0.658815	0.646483	0.583304	0.778223	0.736171	0	0.710112	0.659099	0.74718	0.764107
1.755	0.789213	0.736741	0.720823	0	0.734836	0	0.646706	0.758084	0.678472	0.815686	0.702061	0.766333	0.692997	0.699643	0.771933	0.774623	0.705277	0.6338	0.704809	0.952826	0.540865	0.605791	0.801808	0.677347	0	0	0.823669	0.621828	0.65801	0.655592	0.746336	0.777153	0.784761	0.713837	0.65199	0.711825	0.793315	0	0.640288	0.656452	0.614629	0.594558	0.765871	0.715482	0	0.719266	0.681729	0.68401	0.732153
1.82	0.762582	0.678463	0.707183	0	0.783229	0	0.58624	0.687633	0.636324	0.735294	0.661081	0.760551	0.726091	0.699882	0.686544	0.751534	0.744618	0.605124	0.708409	0.930584	0.577836	0.571908	0.803287	0.688165	0	0	0.774147	0.657588	0.633108	0.620263	0.773608	0.769158	0.808023	0.710852	0.617712	0.713139	0.72075	0	0.625163	0.624222	0.644641	0.608401	0.70015	0.676849	0	0.698225	0.647729	0.673499	0.678531
1.885	0.763849	0.683093	0.736368	0	0.725484	0	0.582705	0.626628	0.623207	0.801961	0.650431	0	0.722779	0.679473	0.711552	0.69041	0	0.56096	0.660817	0.811454	0.537268	0.606029	0.821083	0.704589	0	0	0.728978	0.613579	0.699306	0.658788	0.758425	0.794213	0.755536	0.684407	0.64431	0.633117	0.643023	0	0.584042	0.618194	0	0.609858	0.732463	0.66215	0	0.678729	0.618398	0.622273	0.654695
1.95	0.693307	0	0.683745	0	0.726428	0	0.611078	0	0.649623	0.747059	0.651203	0	0.691078	0.671118	0.7084	0.69349	0	0.602823	0.649133	0.80954	0.55514	0	0.774435	0.696181	0	0	0.774072	0.622242	0.66844	0.613471	0.768561	0.775874	0.756569	0.665885	0.596589	0.647165	0.627602	0	0.508259	0	0	0.541215	0.743697	0.689744	0	0.670352	0.605586	0	0.687599
2.015	0	0	0.631556	0	0.689986	0	0.577876	0	0.623429	0.737255	0	0	0.702601	0.647576	0.651543	0.706541	0	0.651392	0.69725	0.860875	0.545042	0	0.782214	0.6682	0	0	0.8466	0	0	0.621421	0	0.756683	0.741468	0	0.610653	0	0.603901	0	0.503455	0	0	0.515994	0.710472	0.664025	0	0.65252	0.614325	0	0.660785
2.08	0	0	0.613652	0	0.66333	0	0.607527	0	0.59272	0.778431	0	0	0.694931	0.644475	0.691097	0	0	0	0.678605	0.820768	0.561475	0	0	0	0	0	0.772788	0	0	0.581595	0	0.817668	0.726622	0	0.59701	0	0.611932	0	0.546132	0	0	0.553353	0	0.616442	0	0.595553	0.63436	0	0
2.145	0	0	0	0	0	0	0.580467	0	0.610148	0.715686	0	0	0	0	0.6786	0	0	0	0.648921	0.747603	0.570766	0	0	0	0	0	0	0	0	0.590477	0	0	0	0	0.587865	0	0.617383	0	0.538262	0	0	0	0	0.620255	0	0.58409	0.630291	0	0
2.21	0	0	0	0	0	0	0.55443	0	0.612965	0.721569	0	0	0	0	0.699686	0	0	0	0.653707	0	0.538045	0	0	0	0	0	0	0	0	0.623421	0	0	0	0	0.579136	0	0.612978	0	0.543915	0	0	0	0	0	0	0.599058	0.59175	0	0
2.275	0	0	0	0	0	0	0	0	0.586277	0	0	0	0	0	0	0	0	0	0.590556	0	0	0	0	0	0	0	0	0	0	0	0	0	0	0	0.565642	0	0.600708	0	0.546203	0	0	0	0	0	0	0.619663	0.581267	0	0
2.34	0	0	0	0	0	0	0	0	0	0	0	0	0	0	0	0	0	0	0	0	0	0	0	0	0	0	0	0	0	0	0	0	0	0	0.551379	0	0.598808	0	0.474462	0	0	0	0	0	0	0	0	0	0
2.405	0	0	0	0	0	0	0	0	0	0	0	0	0	0	0	0	0	0	0	0	0	0	0	0	0	0	0	0	0	0	0	0	0	0	0	0	0.567475	0	0.494783	0	0	0	0	0	0	0	0	0	0
0	0.137489	0.214653	0.214823	0.113309	0.1505	0.105715	0.107809	0.206464	0.055098	0.0710902	0.115992	0.172705	0.0800668	0.141786	0.246586	0.0787384	0.129249	0.150913	0.121466	0.088681	0.210239	0.21586	0.14029	0.221497	0.0887043	0.137996	0.154505	0.0722404	0.168494	0.121049	0.159955	0.18514	0.185498	0.0946495	0.155459	0.188051	0.0641981	0.184303	0.0896385	0.0793689	0.123951	0.179575	0.181179	0.100568	0.345316	0.171522	0.0888501	0.106761	0.130755
0.065	0.155257	0.238355	0.237278	0.133728	0.174093	0.125597	0.133906	0.27791	0.0653224	0.0796442	0.12629	0.207028	0.0900601	0.15931	0.28886	0.0853176	0.141562	0.167039	0.13754	0.103887	0.237074	0.248195	0.160892	0.258416	0.110616	0.160682	0.185648	0.0817832	0.181994	0.132501	0.183741	0.198545	0.215019	0.109669	0.192812	0.234131	0.0723676	0.215644	0.108013	0.0863155	0.142888	0.207206	0.209177	0.115025	0.410439	0.20107	0.102076	0.130783	0.163714
0.13	0.177003	0.258477	0.265743	0.166733	0.197211	0.159956	0.153878	0.365002	0.0767688	0.0940148	0.139416	0.231054	0.102527	0.184843	0.353353	0.0933229	0.152917	0.176101	0.160444	0.123455	0.271773	0.29289	0.180832	0.307873	0.140337	0.185484	0.229411	0.0971538	0.205464	0.151919	0.22279	0.22186	0.244714	0.126273	0.242732	0.310298	0.0784795	0.25098	0.129869	0.102808	0.16668	0.25342	0.245037	0.136234	0.485254	0.240464	0.127027	0.159689	0.204603
0.195	0.20101	0.284596	0.304012	0.211287	0.249735	0.206219	0.183668	0.463499	0.0870069	0.100805	0.155498	0.287062	0.119963	0.219568	0.434716	0.105008	0.184521	0.208364	0.182414	0.148969	0.313117	0.355324	0.211246	0.3607	0.185285	0.220416	0.298317	0.113489	0.231577	0.174915	0.282923	0.251974	0.278697	0.144685	0.299774	0.400401	0.0965833	0.304939	0.157552	0.119476	0.195147	0.308175	0.29283	0.163057	0.56386	0.280921	0.156152	0.204273	0.264045
0.26	0.259	0.31935	0.363015	0.271611	0.314444	0.279575	0.236989	0.567781	0.104732	0.121493	0.177544	0.349282	0.132596	0.265045	0.537942	0.119778	0.225063	0.255821	0.209431	0.188029	0.370531	0.423241	0.251503	0.41394	0.245975	0.272842	0.387079	0.141249	0.269945	0.197331	0.357576	0.298128	0.318273	0.161918	0.358925	0.523525	0.119135	0.376171	0.191881	0.13943	0.234165	0.36775	0.351201	0.198168	0.630807	0.33602	0.19922	0.26944	0.339841
0.325	0.334847	0.359968	0.433023	0.359776	0.404223	0.372385	0.331283	0.667731	0.137063	0.159604	0.213264	0.456527	0.14775	0.315207	0.6478	0.141787	0.272521	0.326194	0.252264	0.230635	0.434109	0.495684	0.303763	0.472212	0.337399	0.345433	0.486166	0.183435	0.351248	0.227424	0.448499	0.343867	0.369663	0.180648	0.441888	0.641941	0.146312	0.466353	0.239544	0.170983	0.28175	0.434441	0.422253	0.23963	0.703379	0.396765	0.249379	0.355779	0.42783
0.39	0.437677	0.407536	0.520985	0.471087	0.491663	0.493999	0.459174	0.760407	0.198654	0.216666	0.262258	0.58585	0.17887	0.374901	0.768085	0.159135	0.336634	0.432343	0.303563	0.288877	0.511738	0.577266	0.380509	0.53377	0.453998	0.448085	0.621811	0.251702	0.447074	0.254222	0.541384	0.412361	0.42244	0.207622	0.540199	0.747065	0.180856	0.571677	0.294047	0.22648	0.34992	0.510868	0.498129	0.295031	0.768992	0.485142	0.313265	0.449771	0.528054
0.455	0.544427	0.462548	0.620602	0.594308	0.596355	0.623795	0.609938	0.849456	0.297351	0.298547	0.337516	0.730258	0.230046	0.448444	0.868928	0.190654	0.403584	0.574797	0.365193	0.368886	0.592951	0.658958	0.491128	0.598718	0.588175	0.574579	0.729844	0.343691	0.572046	0.292102	0.644363	0.510527	0.450637	0.244783	0.646603	0.828934	0.236162	0.693089	0.377328	0.318459	0.432485	0.60823	0.574736	0.361011	0.819729	0.586049	0.393686	0.564754	0.612017
0.52	0.684207	0.536404	0.712758	0.722046	0.679122	0.765526	0.752638	0.909742	0.432866	0.41575	0.44071	0.854808	0.301943	0.5309	0.93929	0.220976	0.479254	0.714501	0.447948	0.462149	0.674558	0.742787	0.625406	0.689916	0.7264	0.703057	0.854438	0.4633	0.704401	0.34233	0.745613	0.614648	0.514192	0.308523	0.733479	0.903578	0.308285	0.800408	0.467706	0.445219	0.542064	0.69349	0.666343	0.442184	0.87986	0.687893	0.465702	0.670533	0.695818
0.585	0.813469	0.60587	0.80068	0.841434	0.759869	0.880438	0.87667	0.954258	0.580291	0.548797	0.56476	0.94246	0.420444	0.625057	0.992064	0.272787	0.577372	0.8352	0.533756	0.553107	0.766892	0.822754	0.751047	0.783196	0.851529	0.818311	0.938169	0.592052	0.833747	0.405859	0.831027	0.721546	0.570871	0.395895	0.822819	0.946425	0.415284	0.88625	0.578541	0.584503	0.652334	0.786407	0.754237	0.53233	0.929823	0.787689	0.571873	0.781051	0.776968
0.65	0.887703	0.673576	0.869429	0.930525	0.824822	0.964954	0.921321	0.980755	0.724441	0.674449	0.697033	0.975751	0.569218	0.722212	0.999864	0.336167	0.697793	0.935806	0.636434	0.636325	0.859272	0.894149	0.859175	0.866047	0.949373	0.915532	0.98576	0.707502	0.934821	0.483515	0.910654	0.841437	0.629251	0.505871	0.88427	0.99789	0.556286	0.941627	0.683717	0.719584	0.761467	0.885457	0.852299	0.623085	0.96896	0.87599	0.682124	0.868635	0.849068
0.715	0.945406	0.735681	0.94528	0.994751	0.876321	1	0.949203	1	0.832249	0.796363	0.816664	1	0.730006	0.808063	1	0.4141	0.826694	0.99181	0.747621	0.700605	0.965126	0.950691	0.934316	0.941106	1	0.97799	1	0.810236	0.99099	0.584274	0.973539	0.919497	0.687101	0.627482	0.926281	1	0.698039	0.988327	0.782527	0.807374	0.855603	0.936779	0.919153	0.733044	1	0.947318	0.781286	0.925486	0.904696
0.78	1	0.809341	0.981112	1	0.927846	0.987678	0.981899	0.999648	0.893351	0.895431	0.910183	0.998939	0.863095	0.888873	1	0.505964	0.925718	0.99183	0.849841	0.759939	0.999429	0.979927	0.970167	0.988654	0.996876	1	0.990616	0.873776	1	0.694958	1	0.974253	0.747507	0.747084	0.965262	0.997161	0.821268	0.997337	0.875338	0.869862	0.936883	0.973804	0.963352	0.8222	0.999534	0.982461	0.873198	0.965358	0.95375
0.845	0.971095	0.891034	1	0.978571	0.96683	0.924585	1	0.99123	0.942893	0.947571	0.967126	0.961	0.964834	0.944647	0.977056	0.625069	0.976593	1	0.928228	0.804258	1	1	0.996725	1	0.935489	0.987836	0.959115	0.929204	0.981837	0.803881	0.997792	1	0.801758	0.850717	0.993633	0.960176	0.9138	0.999555	0.932243	0.929291	0.979493	1	0.993174	0.915419	0.97577	1	0.938847	1	1
0.91	0.923049	0.954735	0.99889	0.906687	1	0.844564	0.987795	0.980189	0.985192	0.978918	0.993837	0.892052	1	0.986267	0.914501	0.729182	1	0.969567	0.979945	0.847491	1	0.99988	1	0.978867	0.847703	0.90998	0.905476	0.965066	0.923971	0.899695	0.977031	0.996974	0.852723	0.936499	1	0.901222	0.967866	1	0.973818	0.965449	1	0.99287	1	0.973844	0.922618	0.992082	0.98401	0.982253	0.984224
0.975	0.827858	0.986903	0.957535	0.803339	0.998317	0.74932	0.970422	0.958231	1	1	1	0.788629	0.974168	1	0.852431	0.838716	0.98691	0.906659	1	0.89929	1	0.974311	0.994025	0.925717	0.723365	0.824364	0.847938	0.994618	0.823231	0.968175	0.929429	0.951716	0.900981	0.989076	0.993934	0.797671	0.986773	0.975861	1	0.988994	0.995426	0.957393	0.979061	1	0.862739	0.960256	1	0.935285	0.961051
1.04	0.727961	1	0.904824	0.70704	0.982804	0.662839	0.879873	0.927939	0.987901	0.980839	0.988077	0.669588	0.915117	0.99283	0.746582	0.921378	0.919173	0.818346	0.997693	0.957931	0.999482	0.945846	0.984709	0.870521	0.592843	0.709196	0.764036	1	0.721165	1	0.855316	0.883661	0.941534	1	0.961612	0.687078	1	0.927794	0.987448	1	0.972215	0.888109	0.941487	0.990339	0.784016	0.903151	0.982429	0.866888	0.899642
1.105	0.617708	0.972955	0.846572	0.600783	0.941609	0.601548	0.767999	0.867387	0.923757	0.952414	0.950468	0.568651	0.840783	0.958795	0.656646	0.977339	0.815281	0.695955	0.964999	0.986819	0.975868	0.918252	0.943745	0.804546	0.480929	0.599802	0.69447	0.981386	0.623364	0.989057	0.763785	0.799173	0.973774	0.977413	0.920702	0.583219	0.993326	0.854899	0.942266	0.951651	0.936703	0.811917	0.875556	0.95892	0.694247	0.825683	0.923276	0.77626	0.829741
1.17	0.53343	0.919643	0.785384	0.514493	0.881346	0.552723	0.655107	0.804025	0.818389	0.893431	0.875879	0.49237	0.759829	0.91876	0.591814	1	0.707475	0.578602	0.90828	0.991182	0.894958	0.882128	0.880711	0.728287	0.39356	0.501008	0.635206	0.933777	0.521944	0.935717	0.668668	0.717293	0.990573	0.912631	0.868701	0.48879	0.955192	0.788772	0.873661	0.86162	0.889923	0.730199	0.81945	0.901369	0.600489	0.744104	0.836197	0.700219	0.750723
1.235	0.465604	0.855402	0.718666	0.450841	0.793415	0.514316	0.558127	0.74561	0.7	0.803179	0.78307	0.443687	0.707007	0.86548	0.522311	0.988689	0.603014	0.501529	0.826813	1	0.830129	0.836715	0.804676	0.663139	0.32742	0.415685	0.585348	0.850417	0.457951	0.842246	0.582242	0.632783	1	0.824495	0.780158	0.424523	0.871225	0.698317	0.779027	0.741733	0.821636	0.641971	0.745516	0.832824	0.507287	0.660363	0.726632	0.614137	0.67438
1.3	0.413211	0.775207	0.652416	0.401391	0.711609	0.489773	0.467816	0.685616	0.573419	0.67158	0.673348	0.410182	0.666659	0.800744	0.478009	0.95329	0.536572	0.445466	0.727133	0.957311	0.774481	0.7852	0.728346	0.594173	0.274305	0.364073	0.54972	0.748667	0.423751	0.742755	0.524693	0.560431	0.983064	0.726614	0.708548	0.371744	0.754452	0.626051	0.684538	0.61483	0.740065	0.563656	0.671249	0.740506	0.434948	0.584776	0.606737	0.539233	0.61295
1.365	0.369878	0.681434	0.610018	0.364908	0.636131	0.476597	0.418933	0.638411	0.475238	0.547034	0.576105	0.377798	0.620447	0.741567	0.433996	0.895589	0.467213	0.407578	0.632986	0.897009	0.728686	0.730803	0.660669	0.535349	0.238166	0.330747	0.523098	0.640189	0.396636	0.6316	0.463236	0.49841	0.969197	0.625683	0.640769	0.337075	0.632334	0.563648	0.583053	0.500175	0.669103	0.497156	0.62239	0.649397	0.378344	0.51603	0.504622	0.478819	0.566792
1.43	0.344982	0.613394	0.580129	0.34046	0.578469	0.46068	0.377228	0.587773	0.403243	0.424199	0.490959	0.357366	0.571401	0.690078	0.407813	0.818466	0.411616	0.385221	0.540203	0.817588	0.690021	0.673227	0.608271	0.486188	0.211926	0.301972	0.50496	0.547265	0.37471	0.538535	0.418819	0.448698	0.939593	0.542755	0.586909	0.305463	0.527559	0.503743	0.479106	0.404007	0.592005	0.440165	0.567699	0.56503	0.316468	0.459961	0.410187	0.438571	0.544481
1.495	0.32915	0.534534	0.553358	0.323221	0.53144	0	0.346106	0.534554	0.355588	0.34237	0.429704	0.336545	0.521422	0.641221	0.380586	0.730682	0.372718	0.374496	0.470592	0.744533	0.636715	0.614783	0.565815	0.447939	0.185669	0.281559	0.495458	0.463069	0.384011	0.466743	0.381282	0.41165	0.902723	0.477971	0.547272	0.276457	0.462216	0.463185	0.397272	0.332398	0.511184	0.406814	0.521634	0.487068	0.280815	0.412103	0.329679	0.410432	0.514805
1.56	0.313846	0.46796	0.526554	0.307819	0.494327	0	0.309799	0.48538	0.322444	0.277649	0.390129	0.314523	0.444831	0.609162	0.353598	0.66739	0.336884	0.364329	0.424147	0.688342	0.57365	0.573469	0.526183	0.412904	0.169376	0.270843	0.485008	0.407732	0.370385	0.388813	0.342761	0.378341	0.870231	0.420217	0.500002	0.26919	0.429635	0.435988	0.336371	0.285372	0.450874	0.371447	0.471023	0.423109	0	0.37606	0.269488	0.3935	0.496905
1.625	0.307019	0.416773	0.520726	0.287066	0.461099	0	0.290813	0.439598	0.291049	0.225141	0.365459	0.303135	0.381696	0.570221	0.334839	0.600736	0.312668	0.354673	0.380531	0.620255	0.508617	0.525698	0.490474	0.383803	0.155543	0.268427	0.473198	0.360832	0.35846	0.340473	0.324591	0.352139	0.829436	0.380455	0.467862	0.254033	0.424474	0.426184	0.282827	0.249382	0.399633	0.3415	0.447609	0.365327	0	0.352528	0.221628	0.374236	0.494756
1.69	0.29954	0.370914	0.498461	0.272487	0.430241	0	0.263202	0.395016	0.267413	0.205138	0.354058	0.293754	0.3419	0.549608	0.317816	0.536003	0.290944	0.347837	0.342342	0.580331	0.447054	0.502083	0.45418	0.362979	0.146811	0.251915	0.468947	0.322685	0.35475	0.3051	0.297548	0.329375	0.788699	0.343091	0.440775	0.24403	0.411185	0	0.251	0.228713	0.359879	0.316512	0.418618	0.317504	0	0.329954	0.185993	0.36013	0.4734
1.755	0.295382	0.32923	0.484382	0	0.405036	0	0.245698	0.355357	0.252376	0.187977	0.341836	0.289055	0.322536	0.513843	0.298621	0.496158	0.269702	0.344777	0.315289	0.52676	0.397498	0.47528	0.441053	0.338384	0	0	0.454539	0.290859	0.353923	0.272595	0.277934	0.312612	0.752532	0.31334	0.417077	0.245617	0.401529	0	0.223365	0.210387	0.320349	0.29506	0.392363	0.281679	0	0.310728	0.161677	0.348348	0.472851
1.82	0.293639	0.303758	0.461731	0	0.38895	0	0.232525	0.320316	0.23721	0.183345	0.331162	0.288585	0.307157	0.497835	0.285847	0.454429	0.252227	0.3422	0.287975	0.498415	0.35427	0.443408	0.425856	0.314192	0	0	0.439044	0.260425	0.341453	0.245259	0.26824	0.298216	0.710657	0.291495	0.400747	0.238614	0.362781	0	0.199831	0.202012	0.296612	0.280507	0.382018	0.249622	0	0.300429	0.143455	0.344177	0.468703
1.885	0.27382	0.278616	0.446189	0	0.372377	0	0.216641	0.286667	0.22111	0.178476	0.325986	0	0.301385	0.476006	0.277621	0.417503	0	0.345865	0.265099	0.474063	0.318296	0.412026	0.411738	0.295254	0	0	0.433037	0.237121	0.337923	0.225286	0.257621	0.282185	0.663371	0.266406	0.382121	0.232699	0.322088	0	0.180589	0.197073	0	0.260338	0.357386	0.224278	0	0.294094	0.130907	0.336467	0.459781
1.95	0.278979	0	0.434325	0	0.359183	0	0.212749	0	0.212022	0.175633	0.319429	0	0.310635	0.45425	0.265485	0.386044	0	0.342617	0.249905	0.436783	0.288875	0	0.399145	0.270459	0	0	0.422807	0.215712	0.331733	0.203176	0.245507	0.269564	0.637366	0.246581	0.359075	0.228439	0.283429	0	0.160934	0	0	0.250933	0.341277	0.202363	0	0.28836	0.121761	0	0.452357
2.015	0	0	0.418666	0	0.344943	0	0.199476	0	0.204541	0.174685	0	0	0.32646	0.437298	0.260216	0.351271	0	0.344958	0.235303	0.419099	0.262449	0	0.388441	0.249361	0	0	0.411337	0	0	0.188907	0	0.254542	0.619356	0	0.347331	0	0.252403	0	0.149785	0	0	0.246027	0.338007	0.18154	0	0.287713	0.112069	0	0.445222
2.08	0	0	0.398007	0	0.333614	0	0.188289	0	0.197687	0.17279	0	0	0.33664	0.420567	0.249594	0	0	0	0.220936	0.409872	0.236702	0	0	0	0	0	0.400301	0	0	0.1785	0	0.242929	0.592633	0	0.333031	0	0.235297	0	0.140667	0	0	0.234697	0	0.164962	0	0.282521	0.109898	0	0
2.145	0	0	0	0	0	0	0.17891	0	0.184794	0.175659	0	0	0	0	0.238787	0	0	0	0.207582	0.384337	0.211888	0	0	0	0	0	0	0	0	0.165571	0	0	0	0	0.320181	0	0.226541	0	0.125829	0	0	0	0	0.148475	0	0.279596	0.106793	0	0
2.21	0	0	0	0	0	0	0.177587	0	0.171605	0.168948	0	0	0	0	0.226983	0	0	0	0.194775	0	0.193689	0	0	0	0	0	0	0	0	0.151648	0	0	0	0	0.315564	0	0.222143	0	0.115416	0	0	0	0	0	0	0.276457	0.104283	0	0
2.275	0	0	0	0	0	0	0	0	0.159734	0	0	0	0	0	0	0	0	0	0.184052	0	0	0	0	0	0	0	0	0	0	0	0	0	0	0	0.310919	0	0.216467	0	0.10691	0	0	0	0	0	0	0.277167	0.101954	0	0
2.34	0	0	0	0	0	0	0	0	0	0	0	0	0	0	0	0	0	0	0	0	0	0	0	0	0	0	0	0	0	0	0	0	0	0	0.305586	0	0.217816	0	0.0973727	0	0	0	0	0	0	0	0	0	0
2.405	0	0	0	0	0	0	0	0	0	0	0	0	0	0	0	0	0	0	0	0	0	0	0	0	0	0	0	0	0	0	0	0	0	0	0	0	0.218803	0	0.092738	0	0	0	0	0	0	0	0	0	0
[truncated: 2 more columns]

## Sheet: Nup116_centered
																				0.088681													0.185498
																0.0787384				0.103887													0.215019
																0.0853176				0.123455													0.244714
		0.214653														0.0933229				0.148969								0.0722404		0.121049			0.278697	0.0946495			0.0641981			0.0793689
0		0.238355							0.055098	0.0710902	0.115992			0.141786		0.105008			0.121466	0.188029								0.0817832		0.132501			0.318273	0.109669			0.0723676		0.0896385	0.0863155				0.100568			0.0888501
0.065		0.258477			0.1505				0.0653224	0.0796442	0.12629		0.0800668	0.15931		0.119778	0.129249		0.13754	0.230635	0.210239		0.14029					0.0971538		0.151919			0.369663	0.126273	0.155459		0.0784795	0.184303	0.108013	0.102808	0.123951		0.181179	0.115025			0.102076
0.13		0.284596	0.214823		0.174093		0.107809		0.0767688	0.0940148	0.139416		0.0900601	0.184843		0.141787	0.141562	0.150913	0.160444	0.288877	0.237074	0.21586	0.160892	0.221497				0.113489		0.174915		0.18514	0.42244	0.144685	0.192812		0.0965833	0.215644	0.129869	0.119476	0.142888	0.179575	0.209177	0.136234		0.171522	0.127027	0.106761	0.130755
0.195	0.137489	0.31935	0.237278	0.113309	0.197211		0.133906		0.0870069	0.100805	0.155498		0.102527	0.219568		0.159135	0.152917	0.167039	0.182414	0.368886	0.271773	0.248195	0.180832	0.258416		0.137996		0.141249	0.168494	0.197331	0.159955	0.198545	0.450637	0.161918	0.242732		0.119135	0.25098	0.157552	0.13943	0.16668	0.207206	0.245037	0.163057		0.20107	0.156152	0.130783	0.163714
0.26	0.155257	0.359968	0.265743	0.133728	0.249735	0.105715	0.153878	0.206464	0.104732	0.121493	0.177544	0.172705	0.119963	0.265045	0.246586	0.190654	0.184521	0.176101	0.209431	0.462149	0.313117	0.29289	0.211246	0.307873	0.0887043	0.160682	0.154505	0.183435	0.181994	0.227424	0.183741	0.22186	0.514192	0.180648	0.299774	0.188051	0.146312	0.304939	0.191881	0.170983	0.195147	0.25342	0.29283	0.198168	0.345316	0.240464	0.19922	0.159689	0.204603
0.325	0.177003	0.407536	0.304012	0.166733	0.314444	0.125597	0.183668	0.27791	0.137063	0.159604	0.213264	0.207028	0.132596	0.315207	0.28886	0.220976	0.225063	0.208364	0.252264	0.553107	0.370531	0.355324	0.251503	0.3607	0.110616	0.185484	0.185648	0.251702	0.205464	0.254222	0.22279	0.251974	0.570871	0.207622	0.358925	0.234131	0.180856	0.376171	0.239544	0.22648	0.234165	0.308175	0.351201	0.23963	0.410439	0.280921	0.249379	0.204273	0.264045
0.39	0.20101	0.462548	0.363015	0.211287	0.404223	0.159956	0.236989	0.365002	0.198654	0.216666	0.262258	0.231054	0.14775	0.374901	0.353353	0.272787	0.272521	0.255821	0.303563	0.636325	0.434109	0.423241	0.303763	0.41394	0.140337	0.220416	0.229411	0.343691	0.231577	0.292102	0.282923	0.298128	0.629251	0.244783	0.441888	0.310298	0.236162	0.466353	0.294047	0.318459	0.28175	0.36775	0.422253	0.295031	0.485254	0.33602	0.313265	0.26944	0.339841
0.455	0.259	0.536404	0.433023	0.271611	0.491663	0.206219	0.331283	0.463499	0.297351	0.298547	0.337516	0.287062	0.17887	0.448444	0.434716	0.336167	0.336634	0.326194	0.365193	0.700605	0.511738	0.495684	0.380509	0.472212	0.185285	0.272842	0.298317	0.4633	0.269945	0.34233	0.357576	0.343867	0.687101	0.308523	0.540199	0.400401	0.308285	0.571677	0.377328	0.445219	0.34992	0.434441	0.498129	0.361011	0.56386	0.396765	0.393686	0.355779	0.42783
0.52	0.334847	0.60587	0.520985	0.359776	0.596355	0.279575	0.459174	0.567781	0.432866	0.41575	0.44071	0.349282	0.230046	0.5309	0.537942	0.4141	0.403584	0.432343	0.447948	0.759939	0.592951	0.577266	0.491128	0.53377	0.245975	0.345433	0.387079	0.592052	0.351248	0.405859	0.448499	0.412361	0.747507	0.395895	0.646603	0.523525	0.415284	0.693089	0.467706	0.584503	0.432485	0.510868	0.574736	0.442184	0.630807	0.485142	0.465702	0.449771	0.528054
0.585	0.437677	0.673576	0.620602	0.471087	0.679122	0.372385	0.609938	0.667731	0.580291	0.548797	0.56476	0.456527	0.301943	0.625057	0.6478	0.505964	0.479254	0.574797	0.533756	0.804258	0.674558	0.658958	0.625406	0.598718	0.337399	0.448085	0.486166	0.707502	0.447074	0.483515	0.541384	0.510527	0.801758	0.505871	0.733479	0.641941	0.556286	0.800408	0.578541	0.719584	0.542064	0.60823	0.666343	0.53233	0.703379	0.586049	0.571873	0.564754	0.612017
0.65	0.544427	0.735681	0.712758	0.594308	0.759869	0.493999	0.752638	0.760407	0.724441	0.674449	0.697033	0.58585	0.420444	0.722212	0.768085	0.625069	0.577372	0.714501	0.636434	0.847491	0.766892	0.742787	0.751047	0.689916	0.453998	0.574579	0.621811	0.810236	0.572046	0.584274	0.644363	0.614648	0.852723	0.627482	0.822819	0.747065	0.698039	0.88625	0.683717	0.807374	0.652334	0.69349	0.754237	0.623085	0.768992	0.687893	0.682124	0.670533	0.695818
0.715	0.684207	0.809341	0.80068	0.722046	0.824822	0.623795	0.87667	0.849456	0.832249	0.796363	0.816664	0.730258	0.569218	0.808063	0.868928	0.729182	0.697793	0.8352	0.747621	0.89929	0.859272	0.822754	0.859175	0.783196	0.588175	0.703057	0.729844	0.873776	0.704401	0.694958	0.745613	0.721546	0.900981	0.747084	0.88427	0.828934	0.821268	0.941627	0.782527	0.869862	0.761467	0.786407	0.852299	0.733044	0.819729	0.787689	0.781286	0.781051	0.776968
0.78	0.813469	0.891034	0.869429	0.841434	0.876321	0.765526	0.921321	0.909742	0.893351	0.895431	0.910183	0.854808	0.730006	0.888873	0.93929	0.838716	0.826694	0.935806	0.849841	0.957931	0.965126	0.894149	0.934316	0.866047	0.7264	0.818311	0.854438	0.929204	0.833747	0.803881	0.831027	0.841437	0.941534	0.850717	0.926281	0.903578	0.9138	0.988327	0.875338	0.929291	0.855603	0.885457	0.919153	0.8222	0.87986	0.87599	0.873198	0.868635	0.849068
0.845	0.887703	0.954735	0.94528	0.930525	0.927846	0.880438	0.949203	0.954258	0.942893	0.947571	0.967126	0.94246	0.863095	0.944647	0.992064	0.921378	0.925718	0.99181	0.928228	0.986819	0.999429	0.950691	0.970167	0.941106	0.851529	0.915532	0.938169	0.965066	0.934821	0.899695	0.910654	0.919497	0.973774	0.936499	0.965262	0.946425	0.967866	0.997337	0.932243	0.965449	0.936883	0.936779	0.963352	0.915419	0.929823	0.947318	0.938847	0.925486	0.904696
0.91	0.945406	0.986903	0.981112	0.994751	0.96683	0.964954	0.981899	0.980755	0.985192	0.978918	0.993837	0.975751	0.964834	0.986267	0.999864	0.977339	0.976593	0.99183	0.979945	0.991182	1	0.979927	0.996725	0.988654	0.949373	0.97799	0.98576	0.994618	0.99099	0.968175	0.973539	0.974253	0.990573	0.989076	0.993633	0.99789	0.986773	0.999555	0.973818	0.988994	0.979493	0.973804	0.993174	0.973844	0.96896	0.982461	0.98401	0.965358	0.95375
0.975	1	1	1	1	1	1	1	1	1	1	1	1	1	1	1	1	1	1	1	1	1	1	1	1	1	1	1	1	1	1	1	1	1	1	1	1	1	1	1	1	1	1	1	1	1	1	1	1	1
1.04	0.971095	0.972955	0.99889	0.978571	0.998317	0.987678	0.987795	0.999648	0.987901	0.980839	0.988077	0.998939	0.974168	0.99283	1	0.988689	0.98691	0.969567	0.997693	0.957311	1	0.99988	0.994025	0.978867	0.996876	0.987836	0.990616	0.981386	0.981837	0.989057	0.997792	0.996974	0.983064	0.977413	0.993934	0.997161	0.993326	0.975861	0.987448	0.951651	0.995426	0.99287	0.979061	0.990339	0.999534	0.992082	0.982429	0.982253	0.984224
1.105	0.923049	0.919643	0.957535	0.906687	0.982804	0.924585	0.970422	0.99123	0.923757	0.952414	0.950468	0.961	0.915117	0.958795	0.977056	0.95329	0.919173	0.906659	0.964999	0.897009	0.999482	0.974311	0.984709	0.925717	0.935489	0.90998	0.959115	0.933777	0.923971	0.935717	0.977031	0.951716	0.969197	0.912631	0.961612	0.960176	0.955192	0.927794	0.942266	0.86162	0.972215	0.957393	0.941487	0.95892	0.97577	0.960256	0.923276	0.935285	0.961051
1.17	0.827858	0.855402	0.904824	0.803339	0.941609	0.844564	0.879873	0.980189	0.818389	0.893431	0.875879	0.892052	0.840783	0.91876	0.914501	0.895589	0.815281	0.818346	0.90828	0.817588	0.975868	0.945846	0.943745	0.870521	0.847703	0.824364	0.905476	0.850417	0.823231	0.842246	0.929429	0.883661	0.939593	0.824495	0.920702	0.901222	0.871225	0.854899	0.873661	0.741733	0.936703	0.888109	0.875556	0.901369	0.922618	0.903151	0.836197	0.866888	0.899642
1.235	0.727961	0.775207	0.846572	0.70704	0.881346	0.74932	0.767999	0.958231	0.7	0.803179	0.78307	0.788629	0.759829	0.86548	0.852431	0.818466	0.707475	0.695955	0.826813	0.744533	0.894958	0.918252	0.880711	0.804546	0.723365	0.709196	0.847938	0.748667	0.721165	0.742755	0.855316	0.799173	0.902723	0.726614	0.868701	0.797671	0.754452	0.788772	0.779027	0.61483	0.889923	0.811917	0.81945	0.832824	0.862739	0.825683	0.726632	0.77626	0.829741
1.3	0.617708	0.681434	0.785384	0.600783	0.793415	0.662839	0.655107	0.927939	0.573419	0.67158	0.673348	0.669588	0.707007	0.800744	0.746582	0.730682	0.603014	0.578602	0.727133	0.688342	0.830129	0.882128	0.804676	0.728287	0.592843	0.599802	0.764036	0.640189	0.623364	0.6316	0.763785	0.717293	0.870231	0.625683	0.780158	0.687078	0.632334	0.698317	0.684538	0.500175	0.821636	0.730199	0.745516	0.740506	0.784016	0.744104	0.606737	0.700219	0.750723
1.365	0.53343	0.613394	0.718666	0.514493	0.711609	0.601548	0.558127	0.867387	0.475238	0.547034	0.576105	0.568651	0.666659	0.741567	0.656646	0.66739	0.536572	0.501529	0.632986	0.620255	0.774481	0.836715	0.728346	0.663139	0.480929	0.501008	0.69447	0.547265	0.521944	0.538535	0.668668	0.632783	0.829436	0.542755	0.708548	0.583219	0.527559	0.626051	0.583053	0.404007	0.740065	0.641971	0.671249	0.649397	0.694247	0.660363	0.504622	0.614137	0.67438
1.43	0.465604	0.534534	0.652416	0.450841	0.636131	0.552723	0.467816	0.804025	0.403243	0.424199	0.490959	0.49237	0.620447	0.690078	0.591814	0.600736	0.467213	0.445466	0.540203	0.580331	0.728686	0.7852	0.660669	0.594173	0.39356	0.415685	0.635206	0.463069	0.457951	0.466743	0.582242	0.560431	0.788699	0.477971	0.640769	0.48879	0.462216	0.563648	0.479106	0.332398	0.669103	0.563656	0.62239	0.56503	0.600489	0.584776	0.410187	0.539233	0.61295
1.495	0.413211	0.46796	0.610018	0.401391	0.578469	0.514316	0.418933	0.74561	0.355588	0.34237	0.429704	0.443687	0.571401	0.641221	0.522311	0.536003	0.411616	0.407578	0.470592	0.52676	0.690021	0.730803	0.608271	0.535349	0.32742	0.364073	0.585348	0.407732	0.423751	0.388813	0.524693	0.49841	0.752532	0.420217	0.586909	0.424523	0.429635	0.503743	0.397272	0.285372	0.592005	0.497156	0.567699	0.487068	0.507287	0.51603	0.329679	0.478819	0.566792
1.56	0.369878	0.416773	0.580129	0.364908	0.53144	0.489773	0.377228	0.685616	0.322444	0.277649	0.390129	0.410182	0.521422	0.609162	0.478009	0.496158	0.372718	0.385221	0.424147	0.498415	0.636715	0.673227	0.565815	0.486188	0.274305	0.330747	0.54972	0.360832	0.396636	0.340473	0.463236	0.448698	0.710657	0.380455	0.547272	0.371744	0.424474	0.463185	0.336371	0.249382	0.511184	0.440165	0.521634	0.423109	0.434948	0.459961	0.269488	0.438571	0.544481
1.625	0.344982	0.370914	0.553358	0.34046	0.494327	0.476597	0.346106	0.638411	0.291049	0.225141	0.365459	0.377798	0.444831	0.570221	0.433996	0.454429	0.336884	0.374496	0.380531	0.474063	0.57365	0.614783	0.526183	0.447939	0.238166	0.301972	0.523098	0.322685	0.37471	0.3051	0.418819	0.41165	0.663371	0.343091	0.500002	0.337075	0.411185	0.435988	0.282827	0.228713	0.450874	0.406814	0.471023	0.365327	0.378344	0.412103	0.221628	0.410432	0.514805
1.69	0.32915	0.32923	0.526554	0.323221	0.461099	0.46068	0.309799	0.587773	0.267413	0.205138	0.354058	0.357366	0.381696	0.549608	0.407813	0.417503	0.312668	0.364329	0.342342	0.436783	0.508617	0.573469	0.490474	0.412904	0.211926	0.281559	0.50496	0.290859	0.384011	0.272595	0.381282	0.378341	0.637366	0.31334	0.467862	0.305463	0.401529	0.426184	0.251	0.210387	0.399633	0.371447	0.447609	0.317504	0.316468	0.37606	0.185993	0.3935	0.496905
1.755	0.313846	0.303758	0.520726	0.307819	0.430241		0.290813	0.534554	0.252376	0.187977	0.341836	0.336545	0.3419	0.513843	0.380586	0.386044	0.290944	0.354673	0.315289	0.419099	0.447054	0.525698	0.45418	0.383803	0.185669	0.270843	0.495458	0.260425	0.370385	0.245259	0.342761	0.352139	0.619356	0.291495	0.440775	0.276457	0.362781		0.223365	0.202012	0.359879	0.3415	0.418618	0.281679	0.280815	0.352528	0.161677	0.374236	0.494756
1.82	0.307019	0.278616	0.498461	0.287066	0.405036		0.263202	0.48538	0.23721	0.183345	0.331162	0.314523	0.322536	0.497835	0.353598	0.351271	0.269702	0.347837	0.287975	0.409872	0.397498	0.502083	0.441053	0.362979	0.169376	0.268427	0.485008	0.237121	0.35846	0.225286	0.324591	0.329375	0.592633	0.266406	0.417077	0.26919	0.322088		0.199831	0.197073	0.320349	0.316512	0.392363	0.249622		0.329954	0.143455	0.36013	0.4734
1.885	0.29954		0.484382	0.272487	0.38895		0.245698	0.439598	0.22111	0.178476	0.325986	0.303135	0.307157	0.476006	0.334839		0.252227	0.344777	0.265099	0.384337	0.35427	0.47528	0.425856	0.338384	0.155543	0.251915	0.473198	0.215712	0.35475	0.203176	0.297548	0.312612		0.246581	0.400747	0.254033	0.283429		0.180589		0.296612	0.29506	0.382018	0.224278		0.310728	0.130907	0.348348	0.472851
1.95	0.295382		0.461731		0.372377		0.232525	0.395016	0.212022	0.175633	0.319429	0.293754	0.301385	0.45425	0.317816			0.3422	0.249905		0.318296	0.443408	0.411738	0.314192	0.146811		0.468947		0.353923	0.188907	0.277934	0.298216			0.382121	0.24403	0.252403		0.160934			0.280507	0.357386	0.202363		0.300429	0.121761	0.344177	0.468703
2.015	0.293639		0.446189		0.359183		0.216641	0.355357	0.204541	0.174685		0.289055	0.310635	0.437298	0.298621			0.345865	0.235303		0.288875	0.412026	0.399145	0.295254			0.454539		0.341453	0.1785	0.26824	0.282185			0.359075	0.245617	0.235297		0.149785			0.260338	0.341277	0.18154		0.294094	0.112069	0.336467	0.459781
2.08	0.27382		0.434325		0.344943		0.212749	0.320316	0.197687	0.17279		0.288585	0.32646	0.420567	0.285847			0.342617	0.220936		0.262449		0.388441	0.270459			0.439044		0.337923	0.165571	0.257621	0.269564			0.347331	0.238614	0.226541		0.140667			0.250933	0.338007	0.164962		0.28836	0.109898		0.452357
2.145	0.278979		0.418666		0.333614		0.199476	0.286667	0.184794	0.175659			0.33664		0.277621			0.344958	0.207582		0.236702			0.249361			0.433037		0.331733	0.151648	0.245507	0.254542			0.333031	0.232699	0.222143		0.125829			0.246027		0.148475		0.287713	0.106793		0.445222
2.21			0.398007				0.188289		0.171605	0.168948					0.265485				0.194775		0.211888						0.422807					0.242929			0.320181	0.228439	0.216467		0.115416			0.234697				0.282521	0.104283
2.275							0.17891		0.159734						0.260216				0.184052		0.193689						0.411337								0.315564		0.217816		0.10691							0.279596	0.101954
2.34							0.177587								0.249594												0.400301								0.310919		0.218803		0.0973727							0.276457
2.405															0.238787																				0.305586				0.092738							0.277167
															0.226983
																				0.445268													0.379626
																0.484465				0.405369													0.411413
																0.444475				0.41303													0.423391
		0.557813														0.51593				0.494913								0.409066		0.412304			0.423245	0.444295			0.359805			0.348967
0		0.530219							0.291062	0.503922	0.416846			0.450674		0.475562			0.428295	0.475812								0.382409		0.387454			0.439595	0.38046			0.370953		0.382094	0.373884				0.472091			0.463794
0.065		0.5386			0.357589				0.337791	0.490196	0.415596		0.452339	0.394937		0.459622	0.529182		0.465536	0.438365	0.36151		0.542524					0.422596		0.44146			0.447732	0.448813	0.287837		0.37533	0.595119	0.349061	0.369507	0.345052		0.402393	0.444216			0.503418
0.13		0.548586	0.459115		0.392888		0.38813		0.369239	0.45098	0.442628		0.477274	0.456214		0.462369	0.538987	0.471569	0.380895	0.52591	0.372318	0.389171	0.496462	0.438703				0.431425		0.451317		0.555445	0.412649	0.435401	0.323547		0.381024	0.553903	0.367185	0.395719	0.395437	0.4185	0.450048	0.482426		0.415304	0.480067	0.390165	0.315555
0.195	0.516936	0.566651	0.423719	0.440832	0.364674		0.437156		0.374914	0.545098	0.467192		0.495347	0.411449		0.451477	0.528835	0.479927	0.453713	0.519345	0.363227	0.361274	0.518185	0.440028		0.523047		0.430657	0.472901	0.430228	0.542907	0.602469	0.426957	0.391255	0.342947		0.437017	0.56846	0.388748	0.438667	0.418476	0.398982	0.453827	0.464525		0.378441	0.44021	0.418847	0.35751
0.26	0.510544	0.579217	0.414312	0.487029	0.432055	0.381416	0.472767	0.495779	0.384146	0.486275	0.458674	0.538852	0.506286	0.427821	0.41334	0.476494	0.504888	0.494533	0.415132	0.469656	0.347055	0.398377	0.516082	0.447547	0.395402	0.515894	0.401201	0.465147	0.544587	0.428842	0.541522	0.608672	0.49605	0.438222	0.371115	0.555429	0.438082	0.628578	0.418456	0.42811	0.383873	0.365807	0.448951	0.4379	0.714294	0.428184	0.491662	0.403554	0.343889
0.325	0.574712	0.591065	0.431388	0.497896	0.417955	0.464157	0.411939	0.512211	0.385367	0.496078	0.473053	0.5296	0.52911	0.438289	0.411728	0.470961	0.556378	0.514373	0.457081	0.526926	0.383052	0.403156	0.525555	0.43147	0.38845	0.48877	0.424319	0.479454	0.498809	0.473831	0.571589	0.594373	0.499829	0.437347	0.356505	0.552674	0.418296	0.590212	0.418073	0.421914	0.389826	0.430225	0.433392	0.455435	0.62779	0.425019	0.514411	0.417925	0.340942
0.39	0.564629	0.60217	0.456177	0.479353	0.410464	0.466602	0.414504	0.499263	0.383774	0.566667	0.469773	0.622929	0.561504	0.42426	0.433354	0.465091	0.58016	0.486712	0.477826	0.56661	0.405789	0.416518	0.550819	0.486751	0.409783	0.511103	0.464076	0.486368	0.525983	0.503419	0.598684	0.51398	0.496706	0.45046	0.370684	0.562093	0.418458	0.634351	0.410394	0.431363	0.374607	0.477733	0.488847	0.49963	0.677455	0.474235	0.554898	0.442015	0.374166
0.455	0.541739	0.656159	0.504392	0.470616	0.434839	0.480024	0.45514	0.534647	0.381889	0.580392	0.474577	0.66486	0.512293	0.427893	0.478166	0.544117	0.545186	0.505509	0.498877	0.59236	0.423282	0.430939	0.559503	0.485255	0.408135	0.534136	0.453363	0.512624	0.506877	0.548882	0.639797	0.577349	0.513335	0.500651	0.382253	0.56468	0.454019	0.629433	0.417722	0.457978	0.423451	0.409694	0.468999	0.453052	0.67278	0.473371	0.548985	0.419386	0.398284
0.52	0.626753	0.610179	0.552023	0.547888	0.454008	0.469324	0.43066	0.492324	0.391551	0.603922	0.516167	0.619763	0.5163	0.483929	0.472334	0.504349	0.595365	0.538999	0.493003	0.631059	0.471337	0.476699	0.561476	0.535748	0.44693	0.546075	0.46641	0.5166	0.520584	0.499386	0.668166	0.6459	0.56313	0.484731	0.4031	0.576219	0.449886	0.626475	0.367017	0.496605	0.419643	0.416951	0.494276	0.526626	0.648954	0.419086	0.542257	0.421047	0.375047
0.585	0.566944	0.639292	0.531803	0.641589	0.488784	0.455368	0.521488	0.548401	0.422798	0.609804	0.534418	0.619282	0.514256	0.550055	0.497909	0.575612	0.614217	0.58353	0.521894	0.52886	0.479688	0.501278	0.557246	0.523605	0.472518	0.592483	0.532751	0.52281	0.549754	0.494761	0.599022	0.645254	0.567585	0.482071	0.415364	0.544391	0.456623	0.633668	0.410235	0.5147	0.445822	0.454529	0.468676	0.562239	0.653602	0.441729	0.578539	0.468747	0.443843
0.65	0.595183	0.667511	0.522743	0.592978	0.499456	0.465082	0.52662	0.574516	0.418851	0.670588	0.533633	0.635734	0.562984	0.512837	0.474762	0.572845	0.582424	0.549278	0.513164	0.529891	0.441322	0.505677	0.548419	0.534062	0.498601	0.586536	0.48406	0.536366	0.576547	0.524826	0.613802	0.604778	0.568627	0.534558	0.425087	0.560592	0.493442	0.701244	0.451627	0.473012	0.460761	0.388938	0.541303	0.562431	0.667683	0.439765	0.576191	0.469537	0.401853
0.715	0.623988	0.668521	0.543594	0.65603	0.503507	0.502139	0.572815	0.57785	0.467248	0.64902	0.522472	0.569513	0.558272	0.579446	0.510853	0.523237	0.59291	0.54888	0.561809	0.592968	0.516765	0.546063	0.55566	0.531612	0.488419	0.580951	0.572617	0.549093	0.553479	0.51532	0.622739	0.647618	0.654441	0.578135	0.460018	0.533736	0.518435	0.711755	0.469694	0.54886	0.452329	0.444713	0.554947	0.583705	0.69582	0.455227	0.616885	0.516455	0.411674
0.78	0.642546	0.723933	0.532212	0.630096	0.523937	0.521131	0.557946	0.583489	0.532914	0.664706	0.549381	0.635062	0.595903	0.586396	0.578657	0.580348	0.601191	0.577247	0.595662	0.545993	0.567725	0.559382	0.62021	0.568944	0.495125	0.636468	0.630898	0.586168	0.54171	0.554725	0.69743	0.713334	0.719066	0.577447	0.47593	0.629262	0.563018	0.773266	0.519145	0.5432	0.474552	0.481211	0.52931	0.547512	0.690636	0.467152	0.66239	0.504217	0.431762
0.845	0.660194	0.725916	0.591699	0.638167	0.59805	0.52211	0.65152	0.623692	0.526566	0.647059	0.627296	0.676556	0.62798	0.616284	0.563041	0.655147	0.594841	0.605466	0.569658	0.601119	0.614343	0.661254	0.620954	0.593012	0.495493	0.659678	0.67974	0.568998	0.550443	0.560993	0.729541	0.738629	0.752764	0.567416	0.452267	0.639139	0.572957	0.786355	0.534952	0.560848	0.49709	0.48152	0.56081	0.581492	0.755533	0.486828	0.710021	0.517952	0.478917
0.91	0.694076	0.742503	0.598248	0.679265	0.590903	0.582301	0.730875	0.638204	0.525869	0.666667	0.626417	0.674991	0.648307	0.673442	0.650291	0.705088	0.619619	0.645775	0.636533	0.71438	0.724282	0.613384	0.670002	0.609913	0.533639	0.657528	0.677235	0.554732	0.604147	0.598647	0.754061	0.70048	0.869317	0.643042	0.498933	0.535268	0.613495	0.725713	0.535888	0.648402	0.536044	0.487667	0.580581	0.638258	0.821335	0.526931	0.728105	0.546995	0.514578
0.975	0.664197	0.833361	0.712924	0.6997	0.645724	0.644956	0.791378	0.705307	0.594646	0.629412	0.623069	0.689524	0.737668	0.723926	0.621497	0.717135	0.760927	0.68809	0.729903	0.708699	0.793523	0.712031	0.615304	0.633322	0.58765	0.710647	0.642668	0.560764	0.639355	0.649903	0.739523	0.771944	0.969519	0.643256	0.506832	0.581711	0.5779	0.751003	0.54682	0.601697	0.548535	0.565152	0.521812	0.680183	0.753587	0.542752	0.766023	0.565882	0.615965
1.04	0.748575	0.920386	0.752753	0.766477	0.636311	0.696475	0.783446	0.74216	0.662976	0.703922	0.71432	0.737444	0.768974	0.86521	0.592617	0.796479	0.788766	0.768958	0.769854	0.686249	0.948067	0.817358	0.56826	0.662272	0.667749	0.723712	0.756869	0.652937	0.720476	0.706513	0.733298	0.876629	1	0.683028	0.575302	0.658441	0.578033	0.750746	0.588347	0.775022	0.565926	0.64695	0.606273	0.713641	0.913536	0.533028	0.840929	0.605094	0.639288
1.105	0.807825	0.998959	0.694859	0.776794	0.693827	0.742468	0.814095	0.730811	0.767659	0.711765	0.7753	0.754854	0.908633	0.914077	0.708224	0.920805	0.78379	0.868032	0.793612	0.854577	0.983208	0.890449	0.673689	0.697964	0.775069	0.853151	0.820289	0.81604	0.82205	0.74364	0.757225	0.93919	0.956196	0.782128	0.59702	0.65312	0.688388	0.909176	0.665399	0.887185	0.58733	0.758478	0.658207	0.776684	0.947164	0.548338	0.925381	0.639717	0.665515
1.17	0.805536	1	0.876183	0.846251	0.709165	0.85381	0.880041	0.777459	0.855391	0.731373	0.894945	0.756453	0.959879	1	0.624912	0.978621	0.889662	0.903601	0.830204	0.934614	1	0.982236	0.691801	0.723281	0.898321	0.906681	0.856434	0.938997	0.935123	0.768403	0.801375	0.967974	0.867268	0.840601	0.680186	0.720112	0.818332	1	0.792863	0.964825	0.67132	0.851381	0.658326	0.862008	0.946345	0.624564	1	0.646372	0.763995
1.235	0.848078	0.96666	0.955351	0.940728	0.811213	0.928487	0.893338	0.789042	0.970671	0.880392	0.963615	0.833682	1	0.994881	0.738666	0.966531	0.974625	0.926601	0.920069	0.967211	0.964551	1	0.769727	0.839536	1	0.962599	0.91441	1	0.998628	0.877342	0.806296	1	0.864437	0.901903	0.798072	0.726334	0.868793	0.968249	0.907988	1	0.771874	0.958396	0.784226	0.954515	1	0.69611	0.99228	0.751462	0.846283
1.3	0.902624	0.892697	1	1	0.941966	1	1	0.839673	1	0.85098	1	0.83218	0.877539	0.914328	0.829383	1	1	1	0.959211	0.997206	0.90741	0.932104	0.866182	0.92923	0.964369	0.996478	1	0.953052	1	0.941262	0.858161	0.970527	0.816126	0.922284	0.990718	0.878587	0.954062	0.945875	0.877404	0.948682	0.870228	1	0.860412	1	0.998691	0.725174	0.932876	0.847646	1
1.365	0.956287	0.873107	0.939533	0.902943	1	0.98567	0.931831	0.84094	0.962637	1	0.967539	0.902253	0.8252	0.818412	0.836788	0.948091	0.930297	0.938655	1	0.984597	0.775495	0.880878	0.968563	0.973846	0.920042	1	0.931006	0.867909	0.943652	1	0.925687	0.908943	0.78492	1	1	0.857821	1	0.875744	1	0.867485	0.976646	0.909205	1	0.953387	0.912089	0.77254	0.866252	0.927154	0.976787
1.43	0.927306	0.922988	0.875439	0.899375	0.989853	0.934437	0.975665	0.942636	0.861271	0.856863	0.93902	1	0.810545	0.754427	0.886424	0.894631	0.859508	0.872684	0.992578	1	0.769291	0.809663	1	1	0.837053	0.843665	0.980578	0.777212	0.862563	0.969857	0.900807	0.872248	0.754933	0.927497	0.96539	0.940905	0.97047	0.806262	0.913828	0.745139	1	0.829704	0.992423	0.886594	0.814136	0.788877	0.713228	1	0.981849
1.495	1	0.873356	0.797463	0.828847	0.921776	0.887747	0.84734	0.947041	0.86199	0.903922	0.893383	0.974455	0.784104	0.708976	1	0.830587	0.805853	0.769874	0.941479	0.952826	0.751187	0.757885	0.918707	0.978175	0.766798	0.788347	0.982677	0.684255	0.835898	0.899411	1	0.868065	0.784761	0.860988	0.88533	1	0.950577	0.838518	0.824893	0.746874	0.975636	0.748562	0.93597	0.845199	0.805882	0.880306	0.670363	0.904809	0.88011
1.56	0.840348	0.723786	0.706326	0.799403	0.875462	0.886954	0.823152	1	0.808942	0.915686	0.837741	0.978345	0.66988	0.70126	0.987889	0.774623	0.761306	0.703135	0.845936	0.930584	0.636102	0.725018	0.863377	0.855178	0.725756	0.752081	0.964257	0.630006	0.783684	0.800332	0.965376	0.817316	0.808023	0.81608	0.717486	0.96229	0.923519	0.837925	0.773472	0.72869	0.922875	0.675255	0.857857	0.829231	0.847758	1	0.614968	0.860022	0.844566
1.625	0.832649	0.723786	0.799516	0.721447	0.803755	0.780844	0.748138	0.996968	0.876901	0.792157	0.835339	0.897268	0.71784	0.729178	0.876103	0.751534	0.807449	0.634375	0.757473	0.811454	0.610728	0.684342	0.930865	0.871757	0.730377	0.75851	0.844206	0.640305	0.797827	0.695962	0.801935	0.800641	0.755536	0.794613	0.680905	0.805208	0.838539	0.848535	0.707943	0.658815	0.79745	0.668672	0.81735	0.760246	0.846491	0.910082	0.642594	0.820281	0.751256
1.69	0.870689	0.736741	0.752079	0.686928	0.796484	0.773685	0.737361	0.927697	0.707968	0.823529	0.709091	0.865265	0.7007	0.76178	0.838005	0.69041	0.753355	0.612985	0.702864	0.80954	0.618028	0.655583	0.830629	0.853158	0.62362	0.754733	0.800466	0.621828	0.778527	0.655592	0.835296	0.790974	0.756569	0.713837	0.634272	0.761009	0.793315	0.744873	0.634365	0.656452	0.686528	0.625392	0.798082	0.736171	0.808913	0.827991	0.659099	0.753233	0.73288
1.755	0.795578	0.678463	0.728614	0.728466	0.789761		0.679347	0.887849	0.678472	0.815686	0.702061	0.797952	0.714672	0.699643	0.786046	0.69349	0.706572	0.629864	0.704809	0.860875	0.534573	0.691517	0.808692	0.820655	0.715029	0.75129	0.810157	0.657588	0.749769	0.620263	0.835103	0.784763	0.741468	0.710852	0.610772	0.747507	0.72075		0.640288	0.624222	0.646483	0.634863	0.778223	0.715482	0.826457	0.726536	0.681729	0.753848	0.713583
1.82	0.792025	0.683093	0.674779	0.749585	0.734836		0.688548	0.827009	0.636324	0.735294	0.661081	0.785941	0.692997	0.699882	0.789236	0.706541	0.705277	0.65158	0.708409	0.820768	0.540865	0.662776	0.801808	0.69447	0.674019	0.762673	0.786591	0.613579	0.758412	0.658788	0.759102	0.777771	0.726622	0.684407	0.65199	0.755852	0.643023		0.625163	0.618194	0.614629	0.583304	0.765871	0.676849		0.710112	0.647729	0.74718	0.764107
1.885	0.770992		0.720823	0.731379	0.783229		0.646706	0.801419	0.623207	0.801961	0.650431	0.759213	0.726091	0.679473	0.742305		0.744618	0.6338	0.660817	0.747603	0.577836	0.605791	0.803287	0.677347	0.66226	0.729958	0.764901	0.622242	0.760674	0.613471	0.734586	0.777153		0.665885	0.617712	0.716047	0.627602		0.584042		0.644641	0.594558	0.70015	0.66215		0.719266	0.618398	0.68401	0.732153
1.95	0.789213		0.707183		0.725484		0.58624	0.763714	0.649623	0.747059	0.651203	0.727804	0.722779	0.671118	0.718707			0.605124	0.649133		0.537268	0.571908	0.821083	0.688165	0.698416		0.782497		0.65801	0.621421	0.746336	0.769158			0.64431	0.66376	0.603901		0.508259			0.608401	0.732463	0.689744		0.698225	0.605586	0.673499	0.678531
2.015	0.762582		0.736368		0.726428		0.582705	0.758084	0.623429	0.737255		0.766333	0.691078	0.647576	0.771933			0.56096	0.69725		0.55514	0.606029	0.774435	0.704589			0.823669		0.633108	0.581595	0.773608	0.794213			0.596589	0.711825	0.611932		0.503455			0.609858	0.743697	0.664025		0.678729	0.614325	0.622273	0.654695
2.08	0.763849		0.683745		0.689986		0.611078	0.687633	0.59272	0.778431		0.760551	0.702601	0.644475	0.686544			0.602823	0.678605		0.545042		0.782214	0.696181			0.774147		0.699306	0.590477	0.758425	0.775874			0.610653	0.713139	0.617383		0.546132			0.541215	0.710472	0.616442		0.670352	0.63436		0.687599
2.145	0.693307		0.631556		0.66333		0.577876	0.626628	0.610148	0.715686			0.694931		0.711552			0.651392	0.648921		0.561475			0.6682			0.728978		0.66844	0.623421	0.768561	0.756683			0.59701	0.633117	0.612978		0.538262			0.515994		0.620255		0.65252	0.630291		0.660785
2.21			0.613652				0.607527		0.612965	0.721569					0.7084				0.653707		0.570766						0.774072					0.817668			0.587865	0.647165	0.600708		0.543915			0.553353				0.595553	0.59175
2.275							0.580467		0.586277						0.651543				0.590556		0.538045						0.8466								0.579136		0.598808		0.546203							0.58409	0.581267
2.34							0.55443								0.691097												0.772788								0.565642		0.567475		0.474462							0.599058
2.405															0.6786																				0.551379				0.494783							0.619663
															0.699686
[truncated: 5 more columns]

## Sheet: Nup133_raw
	WellL04_PointL04_0000_ChannelBF,GFP_BP_dual,mCherrydual_Seq0115.nd2_1_x	WellL04_PointL04_0000_ChannelBF,GFP_BP_dual,mCherrydual_Seq0115.nd2_1_I_GFP	WellL04_PointL04_0000_ChannelBF,GFP_BP_dual,mCherrydual_Seq0115.nd2_1_I_mCh	WellL04_PointL04_0000_ChannelBF,GFP_BP_dual,mCherrydual_Seq0115.nd2_2_x	WellL04_PointL04_0000_ChannelBF,GFP_BP_dual,mCherrydual_Seq0115.nd2_2_I_GFP	WellL04_PointL04_0000_ChannelBF,GFP_BP_dual,mCherrydual_Seq0115.nd2_2_I_mCh	WellL04_PointL04_0000_ChannelBF,GFP_BP_dual,mCherrydual_Seq0115.nd2_3_x	WellL04_PointL04_0000_ChannelBF,GFP_BP_dual,mCherrydual_Seq0115.nd2_3_I_GFP	WellL04_PointL04_0000_ChannelBF,GFP_BP_dual,mCherrydual_Seq0115.nd2_3_I_mCh	WellL04_PointL04_0000_ChannelBF,GFP_BP_dual,mCherrydual_Seq0115.nd2_4_x	WellL04_PointL04_0000_ChannelBF,GFP_BP_dual,mCherrydual_Seq0115.nd2_4_I_GFP	WellL04_PointL04_0000_ChannelBF,GFP_BP_dual,mCherrydual_Seq0115.nd2_4_I_mCh	WellL04_PointL04_0000_ChannelBF,GFP_BP_dual,mCherrydual_Seq0115.nd2_5_x	WellL04_PointL04_0000_ChannelBF,GFP_BP_dual,mCherrydual_Seq0115.nd2_5_I_GFP	WellL04_PointL04_0000_ChannelBF,GFP_BP_dual,mCherrydual_Seq0115.nd2_5_I_mCh	WellL04_PointL04_0000_ChannelBF,GFP_BP_dual,mCherrydual_Seq0115.nd2_6_x	WellL04_PointL04_0000_ChannelBF,GFP_BP_dual,mCherrydual_Seq0115.nd2_6_I_GFP	WellL04_PointL04_0000_ChannelBF,GFP_BP_dual,mCherrydual_Seq0115.nd2_6_I_mCh	WellL04_PointL04_0000_ChannelBF,GFP_BP_dual,mCherrydual_Seq0115.nd2_7_x	WellL04_PointL04_0000_ChannelBF,GFP_BP_dual,mCherrydual_Seq0115.nd2_7_I_GFP	WellL04_PointL04_0000_ChannelBF,GFP_BP_dual,mCherrydual_Seq0115.nd2_7_I_mCh	WellL04_PointL04_0000_ChannelBF,GFP_BP_dual,mCherrydual_Seq0115.nd2_8_x	WellL04_PointL04_0000_ChannelBF,GFP_BP_dual,mCherrydual_Seq0115.nd2_8_I_GFP	WellL04_PointL04_0000_ChannelBF,GFP_BP_dual,mCherrydual_Seq0115.nd2_8_I_mCh	WellL04_PointL04_0000_ChannelBF,GFP_BP_dual,mCherrydual_Seq0115.nd2_9_x	WellL04_PointL04_0000_ChannelBF,GFP_BP_dual,mCherrydual_Seq0115.nd2_9_I_GFP	WellL04_PointL04_0000_ChannelBF,GFP_BP_dual,mCherrydual_Seq0115.nd2_9_I_mCh	WellL04_PointL04_0000_ChannelBF,GFP_BP_dual,mCherrydual_Seq0115.nd2_10_x	WellL04_PointL04_0000_ChannelBF,GFP_BP_dual,mCherrydual_Seq0115.nd2_10_I_GFP	WellL04_PointL04_0000_ChannelBF,GFP_BP_dual,mCherrydual_Seq0115.nd2_10_I_mCh	WellL04_PointL04_0000_ChannelBF,GFP_BP_dual,mCherrydual_Seq0115.nd2_11_x	WellL04_PointL04_0000_ChannelBF,GFP_BP_dual,mCherrydual_Seq0115.nd2_11_I_GFP	WellL04_PointL04_0000_ChannelBF,GFP_BP_dual,mCherrydual_Seq0115.nd2_11_I_mCh	WellL04_PointL04_0000_ChannelBF,GFP_BP_dual,mCherrydual_Seq0115.nd2_12_x	WellL04_PointL04_0000_ChannelBF,GFP_BP_dual,mCherrydual_Seq0115.nd2_12_I_GFP	WellL04_PointL04_0000_ChannelBF,GFP_BP_dual,mCherrydual_Seq0115.nd2_12_I_mCh	WellL04_PointL04_0000_ChannelBF,GFP_BP_dual,mCherrydual_Seq0115.nd2_13_x	WellL04_PointL04_0000_ChannelBF,GFP_BP_dual,mCherrydual_Seq0115.nd2_13_I_GFP	WellL04_PointL04_0000_ChannelBF,GFP_BP_dual,mCherrydual_Seq0115.nd2_13_I_mCh	WellL04_PointL04_0000_ChannelBF,GFP_BP_dual,mCherrydual_Seq0115.nd2_14_x	WellL04_PointL04_0000_ChannelBF,GFP_BP_dual,mCherrydual_Seq0115.nd2_14_I_GFP	WellL04_PointL04_0000_ChannelBF,GFP_BP_dual,mCherrydual_Seq0115.nd2_14_I_mCh	WellL04_PointL04_0000_ChannelBF,GFP_BP_dual,mCherrydual_Seq0115.nd2_15_x	WellL04_PointL04_0000_ChannelBF,GFP_BP_dual,mCherrydual_Seq0115.nd2_15_I_GFP	WellL04_PointL04_0000_ChannelBF,GFP_BP_dual,mCherrydual_Seq0115.nd2_15_I_mCh	WellL04_PointL04_0000_ChannelBF,GFP_BP_dual,mCherrydual_Seq0115.nd2_16_x	WellL04_PointL04_0000_ChannelBF,GFP_BP_dual,mCherrydual_Seq0115.nd2_16_I_GFP	WellL04_PointL04_0000_ChannelBF,GFP_BP_dual,mCherrydual_Seq0115.nd2_16_I_mCh	WellL04_PointL04_0000_ChannelBF,GFP_BP_dual,mCherrydual_Seq0115.nd2_17_x
1	0	259	4107	0	313	5301	0	254	2550	0	250	2598	0	271	4534	0	273	4505	0	308	8419	0	323	2978	0	298	2369	0	281	3153	0	224	1145	0	272	2924	0	335	5668	0	259	2305	0	305	4525	0	300	5355	0
2	0.065	224	4699	0.065	280.567	6214.84	0.065	243.087	2909.2	0.065	246.072	2948.19	0.065	302.604	5170.4	0.065	274.717	4780.74	0.065	263.38	9714.07	0.065	322.02	3137.78	0.065	283.338	2359.7	0.065	304.034	3397.57	0.065	222.192	1491	0.065	282.23	3057.98	0.065	301.054	6131.1	0.065	227.418	2187.85	0.065	298.8	4730.27	0.065	274.755	5910.05	0.065
3	0.13	240	5535	0.13	275.478	7534.54	0.13	261.394	3382.24	0.13	258.931	3492.02	0.13	275.476	5941.96	0.13	314.513	5301.05	0.13	305.941	11556.2	0.13	296.258	3425.6	0.13	263.258	2517.48	0.13	292.795	3672.78	0.13	226.064	1894.17	0.13	317.603	3304.16	0.13	304.655	6505.94	0.13	236.032	2385.46	0.13	297.721	4538.36	0.13	285.041	6294.97	0.13
4	0.195	259	6439	0.195	287.211	9479.17	0.195	262.307	3938.13	0.195	289.106	4225.11	0.195	267.551	6635.58	0.195	285.067	5848.66	0.195	288.686	14185.3	0.195	304.399	3684.64	0.195	270.087	2629.59	0.195	285.204	4160.82	0.195	220.385	2571.63	0.195	263.986	3396.82	0.195	305.52	6834.56	0.195	232.682	2638.83	0.195	282.978	4771.98	0.195	281.544	7009.98	0.195
5	0.26	257	7588	0.26	291.915	11570.4	0.26	293.44	4757.02	0.26	258.562	5255.11	0.26	286.528	7592.42	0.26	281.744	6601.48	0.26	285.797	18206.8	0.26	316.605	4274.03	0.26	266.514	2773.75	0.26	282.895	4941.14	0.26	232.685	3523.45	0.26	302.441	3489.51	0.26	330.896	7073.08	0.26	233.836	2915.92	0.26	293.752	4878.53	0.26	258.695	7735.83	0.26
6	0.325	277	9122	0.325	295.012	14419.4	0.325	283.869	5943.21	0.325	269.213	6534.18	0.325	284.081	8645.2	0.325	303.238	7388.36	0.325	315.803	23922.9	0.325	314.987	4881	0.325	277.926	3161.86	0.325	308.745	6251.05	0.325	243.24	5130.57	0.325	284.532	3665.36	0.325	372.111	7263.14	0.325	236.762	3413.3	0.325	285.442	5132.45	0.325	297.053	8700.18	0.325
7	0.39	298	11314	0.39	283.013	17528.3	0.39	264.184	7759.1	0.39	277.73	7937.12	0.39	283.421	9898.36	0.39	310.709	8442.05	0.39	282.059	31692.5	0.39	302.815	5727.97	0.39	291.326	3749.34	0.39	314.628	8118.84	0.39	249.492	7706.57	0.39	292.56	3624.92	0.39	307.449	7347.77	0.39	228.93	3975.95	0.39	264.026	5149.12	0.39	298.042	9731	0.39
8	0.455	281	14398	0.455	288.289	20598.1	0.455	273.191	10235.8	0.455	276.697	10200.2	0.455	295.175	12070.3	0.455	326.341	10057.3	0.455	303.958	38297.7	0.455	306.637	7245.31	0.455	271.538	4848.92	0.455	289.365	10192.8	0.455	252.585	10859.8	0.455	269.936	4141.1	0.455	300.021	7790.6	0.455	261.022	4907.47	0.455	274.14	5351.02	0.455	276.947	11000.1	0.455
9	0.52	262	18864	0.52	316.603	23493.9	0.52	273.763	13087.5	0.52	284.781	12735	0.52	298.646	14172.7	0.52	301.338	12307.4	0.52	308.736	43363.1	0.52	307.521	8857.11	0.52	271.682	6535.31	0.52	304.301	13039.4	0.52	239.028	14505	0.52	272.873	4283.66	0.52	331.655	8524.7	0.52	256.306	6560.37	0.52	312.595	6161.74	0.52	310.124	12830.7	0.52
10	0.585	314	23920	0.585	316.593	25330.8	0.585	285.173	16727.8	0.585	314.087	15424.3	0.585	321.528	17367	0.585	298.046	15740.2	0.585	281.044	47361.5	0.585	332.034	10333.2	0.585	274.084	9377.24	0.585	313.882	15863.3	0.585	259.833	18590.7	0.585	285.484	4529.88	0.585	345.879	10322.5	0.585	247.315	8511.2	0.585	313.016	7203.66	0.585	311.594	14530.7	0.585
11	0.65	320	28745	0.65	295.243	26368.1	0.65	312.815	20674.1	0.65	293.183	18067.1	0.65	337.828	20761.3	0.65	343.466	19100.1	0.65	318.887	50254.6	0.65	310.084	12140.6	0.65	313.39	12924.5	0.65	331.148	18456	0.65	247.723	22304.5	0.65	285.863	4921.6	0.65	325.693	12985.1	0.65	263.552	11571.6	0.65	327.917	8607.08	0.65	297.258	16642.2	0.65
12	0.715	304	32907	0.715	284.424	26438.7	0.715	320.714	24339.8	0.715	312.833	20027.4	0.715	343.763	24088.7	0.715	405.944	22691.1	0.715	325.15	51027.8	0.715	309.548	13745.8	0.715	312.742	17094.4	0.715	342.254	19908.5	0.715	266.805	26102.3	0.715	285.689	5178.98	0.715	326.394	16653.6	0.715	261.754	15733.8	0.715	345.312	10506.2	0.715	297.94	19827.6	0.715
13	0.78	349	35527	0.78	293.145	25127.7	0.78	334.791	27761.2	0.78	335.833	21654.8	0.78	325.496	27707.6	0.78	361.816	26436	0.78	391.452	50640.9	0.78	316.284	14963.4	0.78	316.391	21584.2	0.78	344.697	20845.6	0.78	271.829	28208.7	0.78	304.152	5659.07	0.78	326.822	20652.9	0.78	287.253	20983.9	0.78	336.056	13029.9	0.78	310.928	23130.8	0.78
14	0.845	352	37317	0.845	324.57	23071.4	0.845	360.159	29831	0.845	322.425	22442	0.845	336.269	30116.6	0.845	364.221	28723.6	0.845	425.013	48057.3	0.845	349.178	16018.9	0.845	304.12	25722.1	0.845	347.694	20332.6	0.845	277.885	29647.3	0.845	329.869	6134.47	0.845	353.987	24234.6	0.845	274.097	26772.3	0.845	360.281	15156.6	0.845	317.512	26288.9	0.845
15	0.91	333	38005	0.91	329.524	20356.7	0.91	365.646	30524.8	0.91	337.132	22331.3	0.91	373.714	31704.9	0.91	341.29	30228.5	0.91	433.371	42932.8	0.91	322.018	15706.9	0.91	274.473	29120.8	0.91	363.836	18899.1	0.91	295.745	29827.8	0.91	334.765	7002.19	0.91	344.54	27006.8	0.91	269.101	31889.2	0.91	351.143	17309.5	0.91	344.932	29375.8	0.91
16	0.975	398	36183	0.975	364.794	17545.9	0.975	386.167	30611.7	0.975	360.166	21924.4	0.975	408.827	31988.6	0.975	360.352	30420.5	0.975	488.842	35698.4	0.975	352.398	14940.9	0.975	326.984	31521.3	0.975	347.993	16400.3	0.975	287.387	28884	0.975	323.352	8627.33	0.975	355.934	28686.7	0.975	301.359	35421.4	0.975	360.929	19390.5	0.975	322.89	31747.2	0.975
17	1.04	423	33247	1.04	380.694	14571.2	1.04	414.487	28626.5	1.04	438.285	19786.5	1.04	488.082	30686.3	1.04	377.875	29690.7	1.04	499.18	28038.6	1.04	367.347	14207.5	1.04	337.302	33177.4	1.04	352.767	13754.5	1.04	318.927	26476.1	1.04	300.24	10370.8	1.04	375.266	28843.7	1.04	351.878	37412.9	1.04	380.894	20805.4	1.04	329.78	33316.2	1.04
18	1.105	474	29472	1.105	358.394	11789.6	1.105	501.589	25672.2	1.105	475.265	18261.5	1.105	557.787	28948	1.105	400.24	28193.8	1.105	457.761	21522.4	1.105	421.975	12616.9	1.105	349.555	33297.6	1.105	359.148	11383.2	1.105	342.032	23378.5	1.105	325.442	12677.6	1.105	410.899	28016.8	1.105	334.152	37216.8	1.105	376.883	21660.8	1.105	353.846	34144.6	1.105
19	1.17	526	26319	1.17	372.037	9684.8	1.17	549.197	21965.6	1.17	518.869	16357.9	1.17	564.465	26249.2	1.17	433.379	25609.5	1.17	411.984	16873.3	1.17	401.855	10929.6	1.17	359.778	32896.7	1.17	369.279	9595.73	1.17	386.166	19427.1	1.17	380.065	14955.9	1.17	409.309	25711.8	1.17	404.666	34897.9	1.17	400.327	21911.1	1.17	370.724	33943.2	1.17
20	1.235	550	23116	1.235	383.913	8238	1.235	565.334	18785.9	1.235	518.312	14474.2	1.235	615.018	23581.8	1.235	410.314	23133.4	1.235	413.531	13429.3	1.235	422.806	9318.49	1.235	353.611	31481.8	1.235	357.275	8279.48	1.235	454.684	15358.6	1.235	381.311	17210.6	1.235	506.086	22513.9	1.235	512.845	31502.9	1.235	429.578	21151.4	1.235	388.444	32802.5	1.235
21	1.3	497	20671	1.3	380.57	7089.29	1.3	495.857	15989.1	1.3	488.981	12826.8	1.3	622.12	20065.4	1.3	466.437	20980	1.3	370.324	11168.5	1.3	398.649	7883.73	1.3	335.616	29225.9	1.3	349.152	7354.17	1.3	488.832	12003.7	1.3	366.28	19517	1.3	523.586	19179	1.3	534.514	27234.5	1.3	487.331	20069.6	1.3	439.908	31116.4	1.3
22	1.365	495	18260	1.365	354.173	6100.31	1.365	461.253	13624.7	1.365	452.76	11667.7	1.365	673.638	17285.4	1.365	448.77	18525.5	1.365	387.352	9508.11	1.365	401.765	6591.23	1.365	350.005	25914.5	1.365	352.015	6641.03	1.365	474.59	9284.86	1.365	360.234	21790.7	1.365	506.878	15282.3	1.365	568.771	23526.1	1.365	513.051	18444.8	1.365	509.97	28658.9	1.365
23	1.43	470	16103	1.43	378.884	5489.89	1.43	426.868	12081.3	1.43	446.02	10420.4	1.43	604.192	15032.8	1.43	436.352	16974	1.43	388.414	8365.6	1.43	406.108	5497.44	1.43	345.547	21943.9	1.43	380.166	6061.03	1.43	450.57	7311.46	1.43	345.839	22466	1.43	507.627	12607.3	1.43	544.852	20772.2	1.43	539.403	16502.7	1.43	511.452	26566.4	1.43
24	1.495	481	14278	1.495	370.961	5178.14	1.495	427.597	10871.3	1.495	446.139	9536.64	1.495	548.162	12999.3	1.495	432.956	15442.2	1.495	378.915	7409.87	1.495	413.725	4772.73	1.495	385.418	18625.7	1.495	364.427	5608.05	1.495	430.172	6088.3	1.495	390.944	23618	1.495	494.55	10931.6	1.495	472.454	18326.6	1.495	542.837	14544.4	1.495	512.219	24428.5	1.495
25	1.56	492	12584	1.56	342.972	4954.15	1.56	426.66	9865.84	1.56	447.916	8904.06	1.56	503.415	11759.7	1.56	407.723	13836.9	0	0	0	1.56	384.974	4201.81	1.56	426.08	15419.8	1.56	351.878	5100.25	1.56	407.869	5276.46	1.56	386.088	23820.6	1.56	424.608	9894.81	1.56	418.793	16161.5	1.56	457.893	13016	1.56	459.149	22778.5	1.56
26	1.625	418	11294	0	0	0	1.625	380.379	9105.5	1.625	403.446	8247.62	1.625	502.319	10937.4	1.625	384.616	12652.1	0	0	0	1.625	370.957	3973.23	1.625	456.854	12652.1	1.625	369.493	4851.33	1.625	374.941	4669.57	1.625	377.491	23070.2	1.625	437.906	9448.8	1.625	375.484	14638.8	1.625	425.793	11656	1.625	469.226	21325.8	1.625
27	1.69	419	10224	0	0	0	1.69	398.806	8419.62	1.69	403.485	7776.56	1.69	425.467	10091.7	1.69	385.298	11762.9	0	0	0	1.69	369.336	3736.12	1.69	466.741	10432.9	0	0	0	1.69	374.054	4182.37	1.69	442.265	21585.8	1.69	421.891	9052.2	1.69	421.514	13302.3	1.69	458.83	10589.5	1.69	431.656	20227.2	1.69
28	1.755	482	9351	0	0	0	1.755	391.164	7890.3	1.755	382.378	7302.26	1.755	393.934	9181.79	1.755	413.365	10904.5	0	0	0	1.755	379.068	3534.73	1.755	433.828	8998.33	0	0	0	1.755	367.599	3864.27	1.755	427.525	20021.7	1.755	437.034	8826.86	1.755	402.239	11981.3	1.755	430.367	9693.46	1.755	404.351	19217	1.755
29	1.82	408	8733	0	0	0	0	0	0	1.82	370.026	7085.43	1.82	383.393	8990.3	1.82	374.948	10245.3	0	0	0	1.82	355.51	3338.53	1.82	445.429	7967.89	0	0	0	1.82	359.001	3695.16	1.82	435.534	17754.2	1.82	425.685	8552.49	1.82	355.801	10976.7	1.82	401.055	9016.96	1.82	395.229	18309.2	1.82
30	1.885	406	7907	0	0	0	0	0	0	1.885	378.08	6865.01	1.885	375.083	8638.37	1.885	398.188	9536.34	0	0	0	1.885	328.174	3210.99	1.885	416.102	7245	0	0	0	1.885	350.542	3476.54	1.885	441.2	15837.5	1.885	466.043	8403.91	1.885	350.47	10004.5	1.885	431.473	8250.77	1.885	392.319	17708.8	1.885
31	0	0	0	0	0	0	0	0	0	0	0	0	1.95	373.083	8235.85	1.95	392.081	9173.49	0	0	0	1.95	333.618	3179.63	1.95	387.212	6780.48	0	0	0	1.95	357.113	3322.04	1.95	431.02	13903.6	1.95	429.395	8424.23	0	0	0	1.95	421.88	7514	1.95	396.051	17060.2	1.95
32	0	0	0	0	0	0	0	0	0	0	0	0	2.015	398.761	7963.06	2.015	380.139	8525.08	0	0	0	2.015	367.917	3064.32	2.015	407.63	6206.43	0	0	0	2.015	327.779	3263.95	2.015	384.234	12759	2.015	430.871	8022.7	0	0	0	2.015	393.356	7060.75	2.015	409.493	16222.1	2.015
33	0	0	0	0	0	0	0	0	0	0	0	0	2.08	358.595	7588.48	2.08	366.498	8165.47	0	0	0	0	0	0	2.08	402.601	5924.56	0	0	0	0	0	0	2.08	386.65	11618.5	2.08	423.241	7797.54	0	0	0	2.08	410.541	6589.74	2.08	373.947	15408	2.08
34	0	0	0	0	0	0	0	0	0	0	0	0	2.145	385.092	7344.25	0	0	0	0	0	0	0	0	0	2.145	422.427	5648.31	0	0	0	0	0	0	2.145	372.211	10915.1	0	0	0	0	0	0	2.145	433.594	6153.72	2.145	392.33	14859.5	2.145
35	0	0	0	0	0	0	0	0	0	0	0	0	2.21	367.361	7069.06	0	0	0	0	0	0	0	0	0	2.21	423.852	5473.82	0	0	0	0	0	0	2.21	372.927	10217.5	0	0	0	0	0	0	2.21	396.29	5686.02	2.21	385.737	14305.4	2.21
36	0	0	0	0	0	0	0	0	0	0	0	0	2.275	351.134	6650.5	0	0	0	0	0	0	0	0	0	2.275	419.048	5144.88	0	0	0	0	0	0	2.275	361.12	9800.24	0	0	0	0	0	0	2.275	365.725	5311.46	2.275	400.697	13810.9	2.275
37	0	0	0	0	0	0	0	0	0	0	0	0	2.34	342.778	6596.72	0	0	0	0	0	0	0	0	0	2.34	371.609	5017.83	0	0	0	0	0	0	2.34	360.283	9425.11	0	0	0	0	0	0	2.34	387.877	5007.55	2.34	364.675	13075.3	2.34
38	0	0	0	0	0	0	0	0	0	0	0	0	0	0	0	0	0	0	0	0	0	0	0	0	2.405	377.143	4681.51	0	0	0	0	0	0	2.405	368.294	9377.32	0	0	0	0	0	0	2.405	379.672	4661.13	2.405	399.981	12573.5	2.405
39	0	0	0	0	0	0	0	0	0	0	0	0	0	0	0	0	0	0	0	0	0	0	0	0	2.47	361.286	4458.62	0	0	0	0	0	0	2.47	353.84	8714.51	0	0	0	0	0	0	2.47	383.075	4520.56	2.47	378.43	12177	0
40	0	0	0	0	0	0	0	0	0	0	0	0	0	0	0	0	0	0	0	0	0	0	0	0	0	0	0	0	0	0	0	0	0	2.535	344.204	8795.36	0	0	0	0	0	0	0	0	0	2.535	400.029	12059.6	0
41	0	0	0	0	0	0	0	0	0	0	0	0	0	0	0	0	0	0	0	0	0	0	0	0	0	0	0	0	0	0	0	0	0	2.6	401.501	8528.37	0	0	0	0	0	0	0	0	0	0	0	0	0
42	0	0	0	0	0	0	0	0	0	0	0	0	0	0	0	0	0	0	0	0	0	0	0	0	0	0	0	0	0	0	0	0	0	2.665	357.56	8412.92	0	0	0	0	0	0	0	0	0	0	0	0	0
[truncated: 104 more columns]

[truncated: 5 more sheets: Nup133_normalized, Nup133_centered, Nup170_raw, Nup170_normalized, Nup170_centered]
